# Supplementary material for: Metabolomics Study of the Effect of Transcription Factor NOR-like1 on Flavonoids in Tomato at Different Stages of Maturity Using UPLC-MS/MS
Source: MDPI journal article supplement (doi:10.3390/foods12244445), 2023-12-11

**Compound name: Astilbin (449.1 / 285.0)**

| Sample Name           | Sample Type     | Area (cps) | Is Area (cps) | RT (min) | S/N  | Target Conc | Calculated Conc.() |
|-----------------------|-----------------|------------|---------------|----------|------|-------------|--------------------|
| STD_0.5nM             | Standard        | 1.04e3     | N/A           | 2.90     | 9.1  | 0.5000      | 3.075874e-1        |
| STD_1nM               | Standard        | 3.81e3     | N/A           | 2.88     | 14.2 | 1.0000      | 1.014366e0         |
| STD_5nM               | Standard        | 2.66e4     | N/A           | 2.88     | 37.4 | 5.0000      | 6.816256e0         |
| STD_10nM              | Standard        | 3.89e4     | N/A           | 2.89     | 39.6 | 10.0000     | 9.940285e0         |
| STD_20nM              | Standard        | 8.07e4     | N/A           | 2.88     | 38.1 | 20.0000     | 2.060403e1         |
| STD_50nM              | Standard        | 1.98e5     | N/A           | 2.89     | 62.0 | 50.0000     | 5.048030e1         |
| STD_100nM             | Standard        | 3.82e5     | N/A           | 2.89     | 48.4 | 100.0000    | 9.733717e1         |
| STD_200nM             | Standard        | N/A        | N/A           | N/A      | N/A  | 200.0000    | N/A                |
| STD_500nM             | Standard        | N/A        | N/A           | N/A      | N/A  | 500.0000    | N/A                |
| STD_1000nM            | Standard        | N/A        | N/A           | N/A      | N/A  | 1000.0000   | N/A                |
| STD_2000nM            | Standard        | N/A        | N/A           | N/A      | N/A  | 2000.0000   | N/A                |
| V1.0_MW_RQC1_20211018 | Quality Control | N/A        | N/A           | N/A      | N/A  | 0.0000      | N/A                |
| Blank                 | Unknown         | N/A        | N/A           | N/A      | N/A  | N/A         | N/A                |
| V1.0_MWMS_20211021_1  | Unknown         | 6.27e5     | N/A           | 2.89     | 50.4 | N/A         | 1.596504e2         |
| MWXS212101D3_R1       | Quality Control | 6.81e5     | N/A           | 2.89     | 50.6 | 0.0000      | 1.733673e2         |
| MWXS212101D3_R2       | Quality Control | 6.33e5     | N/A           | 2.89     | 48.2 | 0.0000      | 1.612760e2         |
| MWXS212101D3_R3       | Quality Control | 6.47e5     | N/A           | 2.89     | 48.9 | 0.0000      | 1.648422e2         |
| A21233250b_b          | Unknown         | 5.19e3     | N/A           | 2.94     | 15.4 | N/A         | 1.364767e0         |
| A21233251b_b          | Unknown         | 5.54e3     | N/A           | 2.93     | 16.2 | N/A         | 1.455099e0         |
| A21233252b_b          | Unknown         | 1.03e4     | N/A           | 2.94     | 20.1 | N/A         | 2.653501e0         |
| A21233253b_b          | Unknown         | 6.07e3     | N/A           | 2.93     | 13.0 | N/A         | 1.588932e0         |
| A21233254b_b          | Unknown         | 5.03e3     | N/A           | 2.93     | 9.3  | N/A         | 1.324983e0         |
| A21233255b_b          | Unknown         | 7.10e3     | N/A           | 2.93     | 15.3 | N/A         | 1.850203e0         |
| A21233256b_b          | Unknown         | 3.23e3     | N/A           | 2.92     | 5.9  | N/A         | 8.651257e-1        |
| A21233257b_b          | Unknown         | 5.67e3     | N/A           | 2.94     | 7.6  | N/A         | 1.486291e0         |
| A21233258b_b          | Unknown         | 4.39e3     | N/A           | 2.93     | 5.5  | N/A         | 1.159875e0         |
| A21233259b_b          | Unknown         | 7.52e3     | N/A           | 2.93     | 17.7 | N/A         | 1.957969e0         |
| A21233260b_b          | Unknown         | 1.19e4     | N/A           | 2.93     | 20.3 | N/A         | 3.074219e0         |
| A21233261b_b          | Unknown         | 1.46e4     | N/A           | 2.93     | 16.5 | N/A         | 3.753957e0         |
| A21233262b_b          | Unknown         | 9.53e3     | N/A           | 2.94     | 18.2 | N/A         | 2.471183e0         |
| A21233263b_b          | Unknown         | 7.27e3     | N/A           | 2.93     | 15.2 | N/A         | 1.893518e0         |
| A21233264b_b          | Unknown         | 7.38e3     | N/A           | 2.93     | 10.3 | N/A         | 1.923572e0         |
| A21233265b_b          | Unknown         | 5.36e3     | N/A           | 2.93     | 6.7  | N/A         | 1.408908e0         |
| A21233266b_b          | Unknown         | 8.54e3     | N/A           | 2.93     | 12.8 | N/A         | 2.216755e0         |
| A21233267b_b          | Unknown         | 8.26e3     | N/A           | 2.94     | 12.5 | N/A         | 2.145825e0         |

Compound name: Astilbin

Regression Equation:  $y = 3926.68587x + -169.27244$  ( $r = 0.99760$ ) (weighting:  $1/x$ )

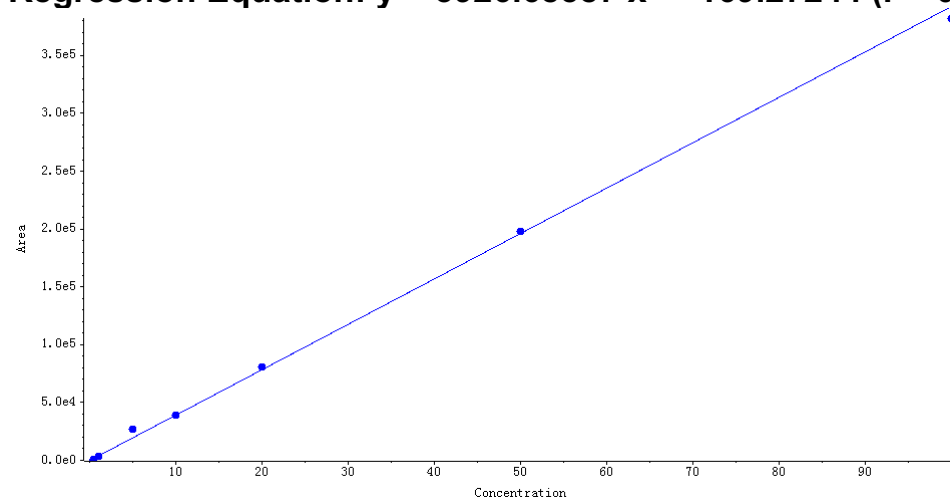

## Peak Review

**V1.0\_MWMS\_20211021\_1**

Astilbin AREA:6.27e5 S/N:50.4

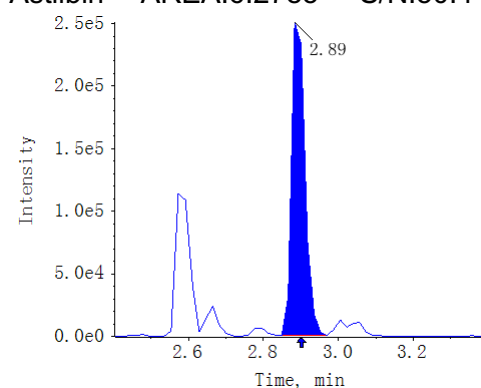

**A21233250b\_b**

Astilbin AREA:5.19e3 S/N:15.4

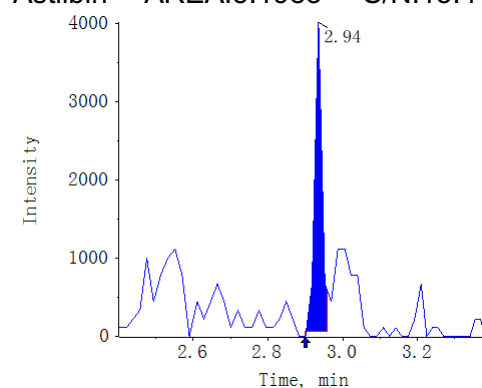

**A21233251b\_b**

Astilbin AREA:5.54e3 S/N:16.2

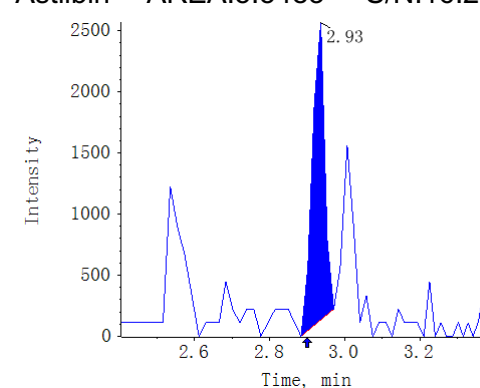

**A21233252b\_b**

Astilbin AREA:1.03e4 S/N:20.1

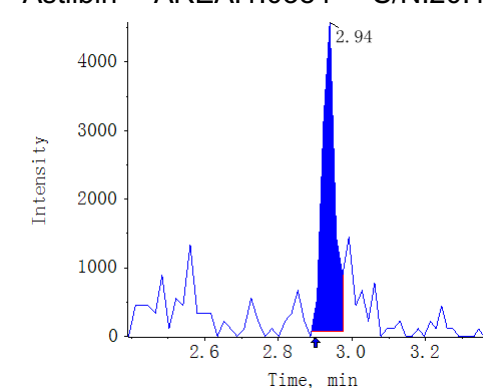

**A21233253b\_b**

Astilbin AREA:6.07e3 S/N:13.0

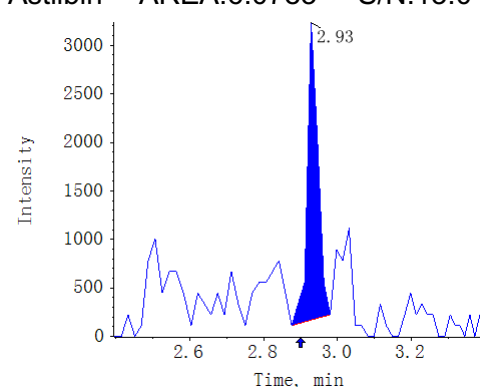

**A21233254b\_b**

Astilbin AREA:5.03e3 S/N:9.3

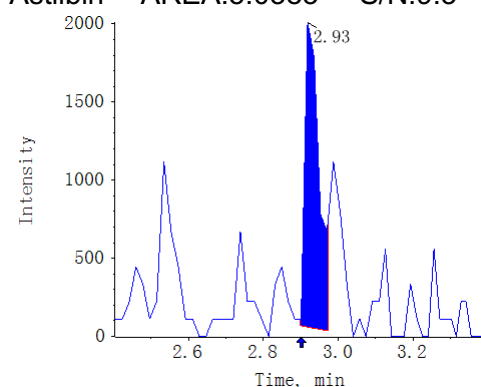

**A21233255b\_b**

Astilbin AREA:7.10e3 S/N:15.3

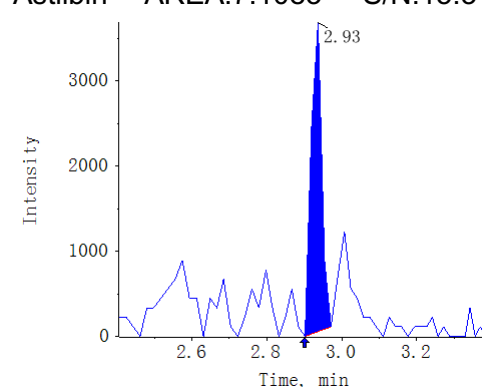

**A21233256b\_b**

Astilbin AREA:3.23e3 S/N:5.9

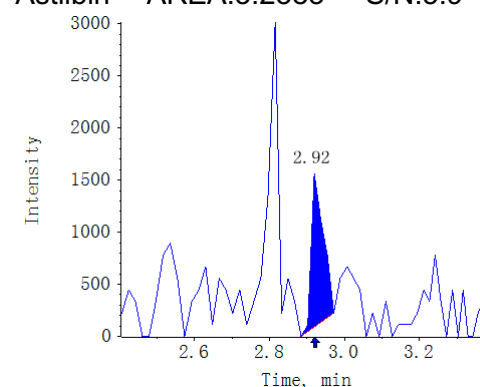

**A21233257b\_b**

Astilbin AREA:5.67e3 S/N:7.6

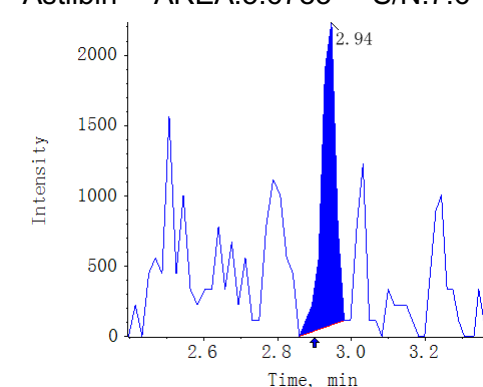

**A21233258b\_b**

Astilbin AREA:4.39e3 S/N:5.5

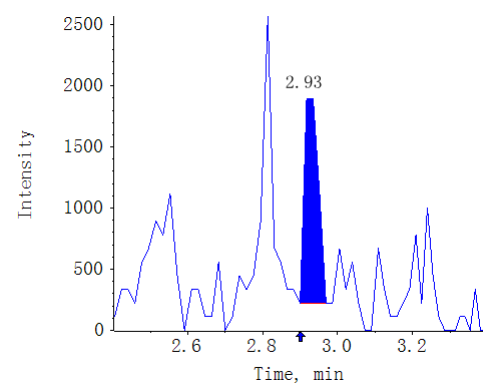

**A21233259b\_b**

Astilbin AREA:7.52e3 S/N:17.7

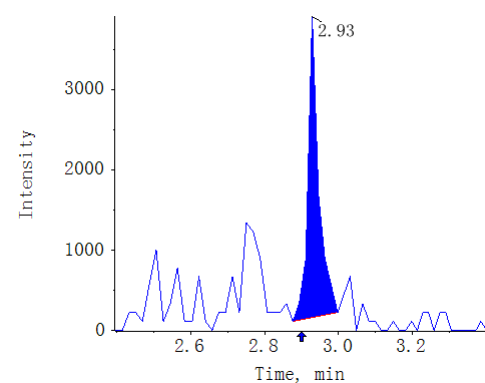

**A21233260b\_b**

Astilbin AREA:1.19e4 S/N:20.3

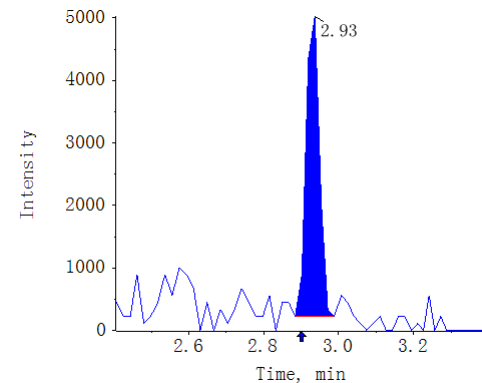

**A21233261b\_b**

Astilbin AREA:1.46e4 S/N:16.5

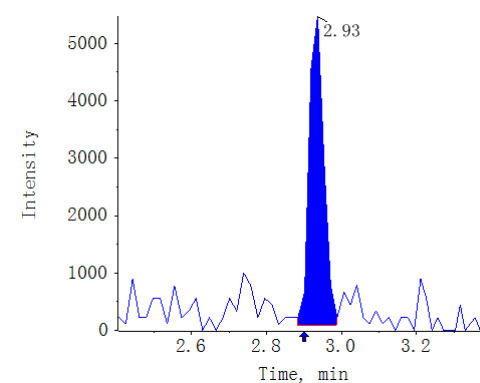

**A21233262b\_b**

Astilbin AREA:9.53e3 S/N:18.2

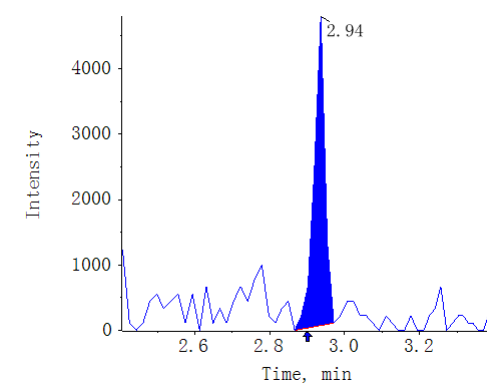

**A21233263b\_b**

Astilbin AREA:7.27e3 S/N:15.2

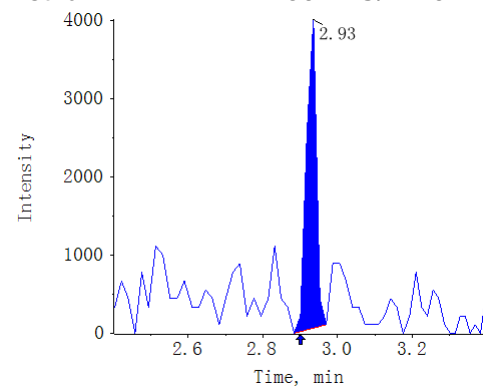

**A21233264b\_b**

Astilbin AREA:7.38e3 S/N:10.3

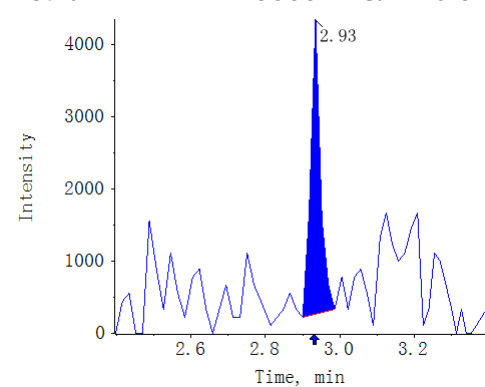

**A21233265b\_b**

Astilbin AREA:5.36e3 S/N:6.7

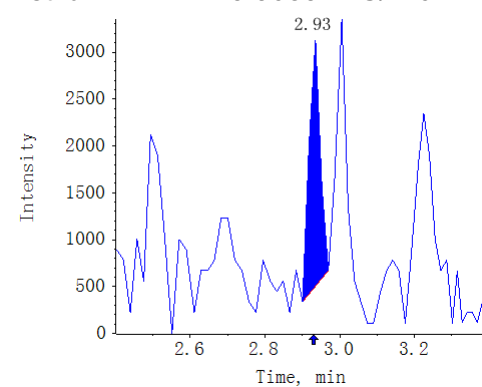

**A21233266b\_b**

Astilbin AREA:8.54e3 S/N:12.8

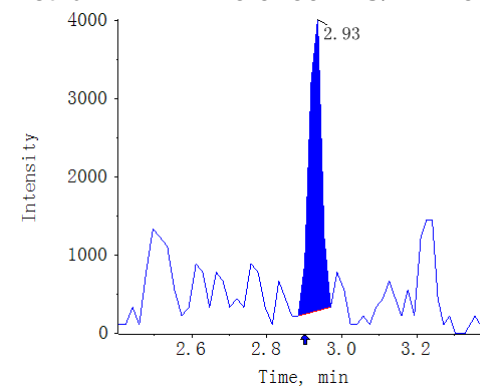

**A21233267b\_b**

Astilbin AREA:8.26e3 S/N:12.5

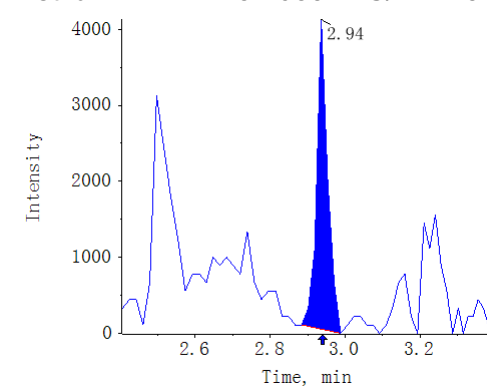

|                    |                                                    |                 |                      |
|--------------------|----------------------------------------------------|-----------------|----------------------|
| Result Table       | MWXS-21-2101D-3_18_WH6500-5_A20-3_V1.0_TY_20211028 | Algorithm Used  | MQ4                  |
| Acquisition Method | Flavonoids_V1.0_WH6500-5_LT_20211025.dam           | Instrument Name | QTRAP 6500+ Low Mass |
| Project            | N/A                                                | Analytes QTY    | 204:31               |

**Compound name: Nicotiflorin (593.2 / 285.1)**

| Sample Name           | Sample Type     | Area (cps) | Is Area (cps) | RT (min) | S/N   | Target Conc | Calculated Conc.() |
|-----------------------|-----------------|------------|---------------|----------|-------|-------------|--------------------|
| STD_0.5nM             | Standard        | 3.80e3     | N/A           | 2.83     | 27.4  | 0.5000      | 3.339511e-1        |
| STD_1nM               | Standard        | 8.30e3     | N/A           | 2.83     | 23.8  | 1.0000      | 1.041180e0         |
| STD_5nM               | Standard        | 4.77e4     | N/A           | 2.83     | 124.4 | 5.0000      | 7.228634e0         |
| STD_10nM              | Standard        | 6.38e4     | N/A           | 2.82     | 94.4  | 10.0000     | 9.761422e0         |
| STD_20nM              | Standard        | 1.16e5     | N/A           | 2.82     | 83.7  | 20.0000     | 1.801543e1         |
| STD_50nM              | Standard        | 3.07e5     | N/A           | 2.83     | 107.6 | 50.0000     | 4.800850e1         |
| STD_100nM             | Standard        | 6.35e5     | N/A           | 2.83     | 119.8 | 100.0000    | 9.951060e1         |
| STD_200nM             | Standard        | 1.29e6     | N/A           | 2.82     | 114.9 | 200.0000    | 2.026003e2         |
| STD_500nM             | Standard        | N/A        | N/A           | N/A      | N/A   | 500.0000    | N/A                |
| STD_1000nM            | Standard        | N/A        | N/A           | N/A      | N/A   | 1000.0000   | N/A                |
| STD_2000nM            | Standard        | N/A        | N/A           | N/A      | N/A   | 2000.0000   | N/A                |
| V1.0_MW_RQC1_20211018 | Quality Control | 1.49e5     | N/A           | 2.82     | 1.9   | 0.0000      | 2.318610e1         |
| Blank                 | Unknown         | N/A        | N/A           | N/A      | N/A   | N/A         | N/A                |
| V1.0_MWMS_20211021_1  | Unknown         | 1.17e6     | N/A           | 2.83     | 132.5 | N/A         | 1.836913e2         |
| MWXS212101D3_R1       | Quality Control | 1.17e6     | N/A           | 2.83     | 132.2 | 0.0000      | 1.830834e2         |
| MWXS212101D3_R2       | Quality Control | 1.17e6     | N/A           | 2.83     | 138.5 | 0.0000      | 1.836526e2         |
| MWXS212101D3_R3       | Quality Control | 1.16e6     | N/A           | 2.83     | 145.3 | 0.0000      | 1.813327e2         |
| A21233250b_b          | Unknown         | 5.11e7     | N/A           | 2.83     | 420.6 | N/A         | 8.026956e3         |
| A21233251b_b          | Unknown         | 4.24e7     | N/A           | 2.83     | 347.4 | N/A         | 6.656387e3         |
| A21233252b_b          | Unknown         | 3.75e7     | N/A           | 2.83     | 449.4 | N/A         | 5.894246e3         |
| A21233253b_b          | Unknown         | 2.46e7     | N/A           | 2.83     | 421.1 | N/A         | 3.862287e3         |
| A21233254b_b          | Unknown         | 1.93e7     | N/A           | 2.83     | 448.1 | N/A         | 3.029318e3         |
| A21233255b_b          | Unknown         | 4.08e7     | N/A           | 2.83     | 441.7 | N/A         | 6.404210e3         |
| A21233256b_b          | Unknown         | 2.22e7     | N/A           | 2.83     | 341.5 | N/A         | 3.485179e3         |
| A21233257b_b          | Unknown         | 2.89e7     | N/A           | 2.84     | 465.3 | N/A         | 4.541700e3         |
| A21233258b_b          | Unknown         | 1.86e7     | N/A           | 2.83     | 299.6 | N/A         | 2.913671e3         |
| A21233259b_b          | Unknown         | 1.06e7     | N/A           | 2.83     | 375.8 | N/A         | 1.661897e3         |
| A21233260b_b          | Unknown         | 4.84e7     | N/A           | 2.82     | 393.3 | N/A         | 7.594609e3         |
| A21233261b_b          | Unknown         | 2.69e7     | N/A           | 2.83     | 343.4 | N/A         | 4.217960e3         |
| A21233262b_b          | Unknown         | 2.40e7     | N/A           | 2.83     | 330.1 | N/A         | 3.771207e3         |
| A21233263b_b          | Unknown         | 2.25e7     | N/A           | 2.82     | 465.5 | N/A         | 3.535343e3         |
| A21233264b_b          | Unknown         | 1.30e7     | N/A           | 2.83     | 431.0 | N/A         | 2.038142e3         |
| A21233265b_b          | Unknown         | 3.64e7     | N/A           | 2.83     | 451.8 | N/A         | 5.717229e3         |
| A21233266b_b          | Unknown         | 1.86e7     | N/A           | 2.82     | 410.5 | N/A         | 2.919524e3         |
| A21233267b_b          | Unknown         | 2.11e7     | N/A           | 2.84     | 390.4 | N/A         | 3.308238e3         |

Compound name: Nicotiflorin

Regression Equation:  $y = 6368.48298x + 1672.21495$  ( $r = 0.99814$ ) (weighting:  $1/x$ )

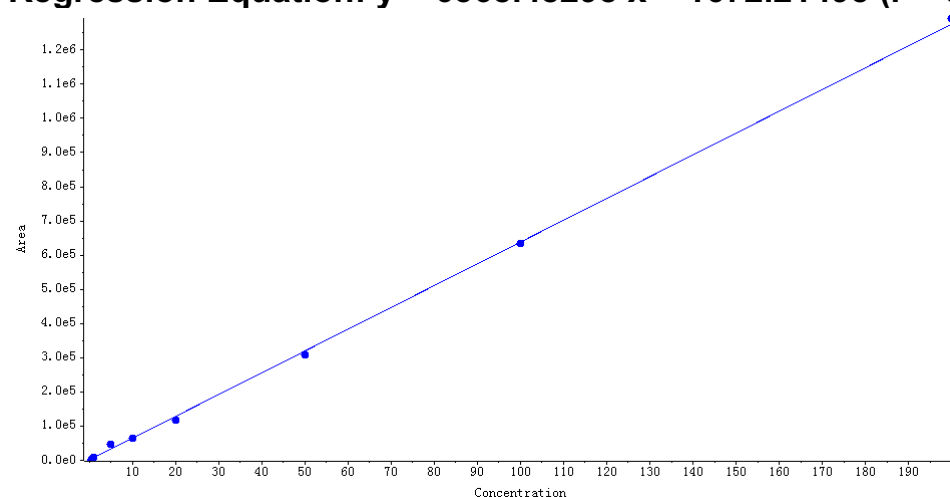

## Peak Review

Blank

Nicotiflorin AREA:N/A S/N:N/A

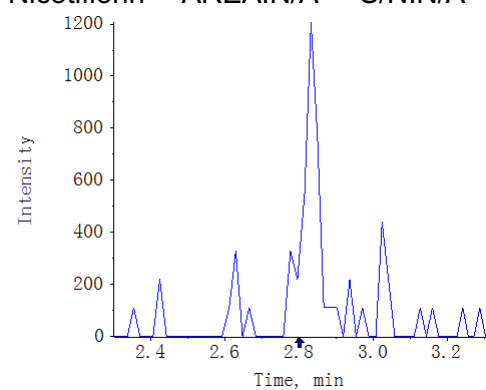

V1.0\_MWMS\_20211021\_1

Nicotiflorin AREA:1.17e6  
S/N:132.5

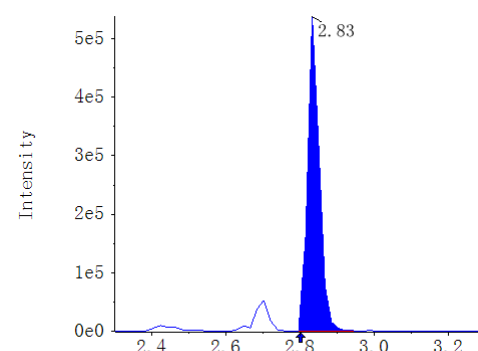

A21233250b\_b

Nicotiflorin AREA:5.11e7  
S/N:420.6

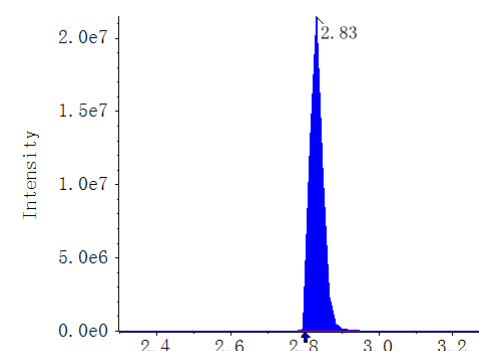

A21233251b\_b

Nicotiflorin AREA:4.24e7  
S/N:347.4

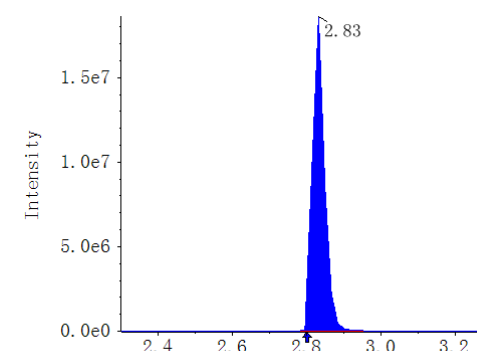

A21233252b\_b

Nicotiflorin AREA:3.75e7  
S/N:449.4

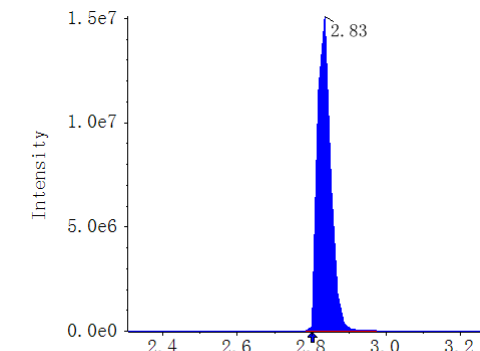

A21233253b\_b

Nicotiflorin AREA:2.46e7  
S/N:421.1

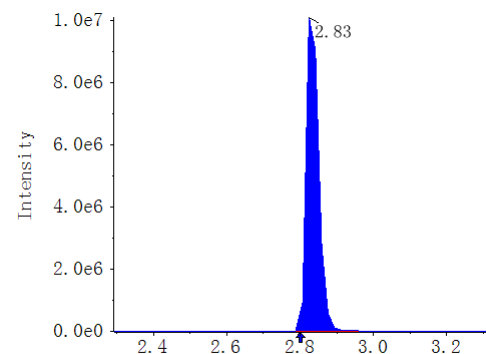

A21233254b\_b

Nicotiflorin AREA:1.93e7  
S/N:448.1

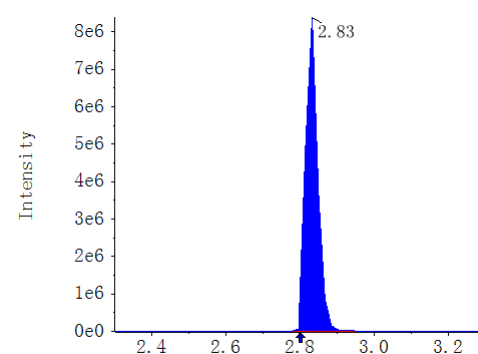

A21233255b\_b

Nicotiflorin AREA:4.08e7  
S/N:441.7

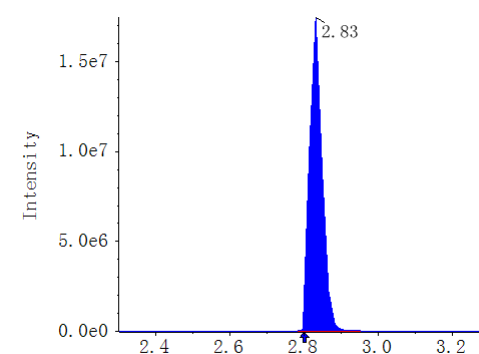

A21233256b\_b

Nicotiflorin AREA:2.22e7  
S/N:341.5

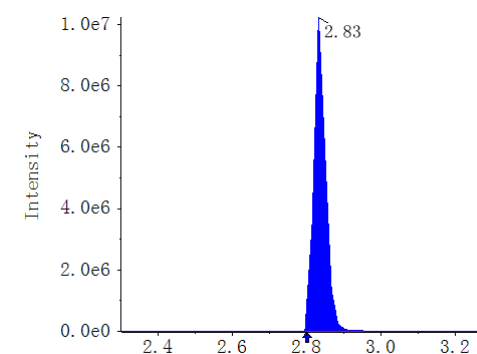

A21233257b\_b

Nicotiflorin AREA:2.89e7  
S/N:465.3

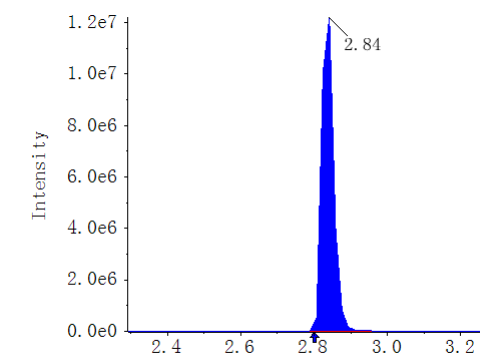

**A21233258b\_b**  
Nicotiflorin AREA:1.86e7  
S/N:299.6

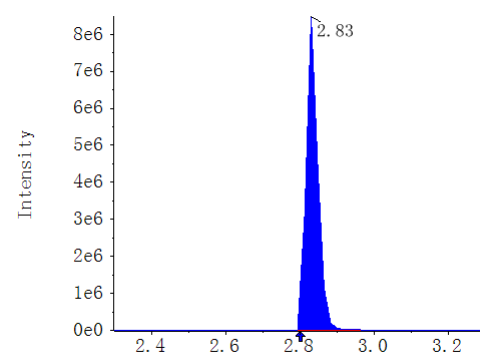

**A21233259b\_b**  
Nicotiflorin AREA:1.06e7  
S/N:375.8

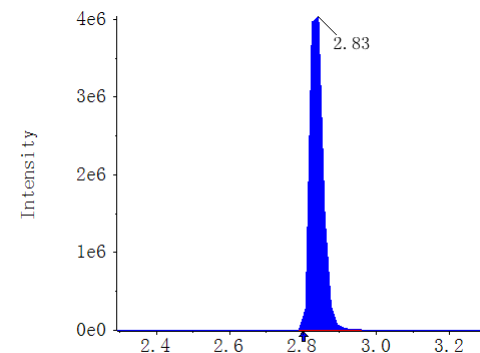

**A21233260b\_b**  
Nicotiflorin AREA:4.84e7  
S/N:393.3

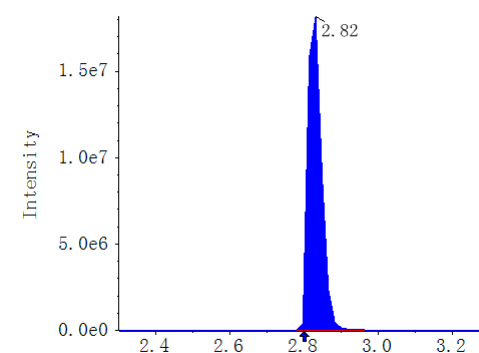

**A21233261b\_b**  
Nicotiflorin AREA:2.69e7  
S/N:343.4

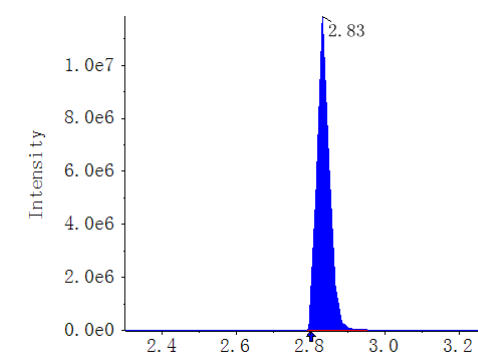

**A21233262b\_b**  
Nicotiflorin AREA:2.40e7  
S/N:330.1

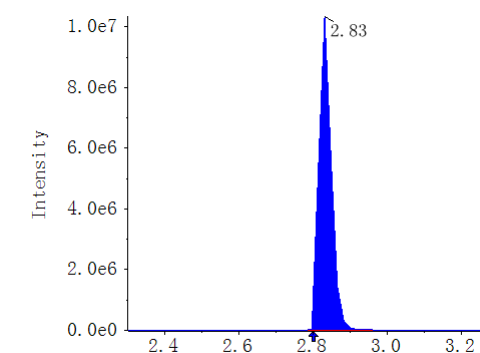

**A21233263b\_b**  
Nicotiflorin AREA:2.25e7  
S/N:465.5

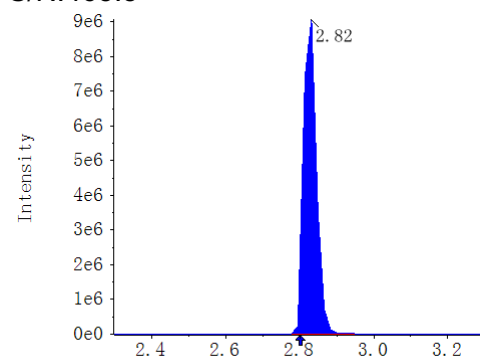

**A21233264b\_b**  
Nicotiflorin AREA:1.30e7  
S/N:431.0

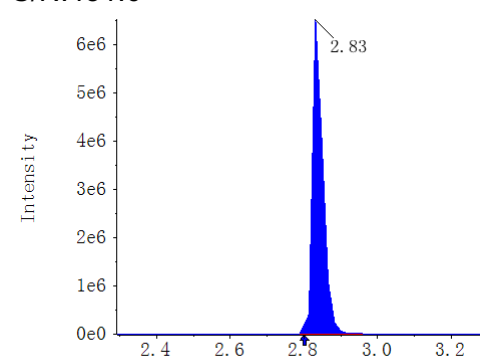

**A21233265b\_b**  
Nicotiflorin AREA:3.64e7  
S/N:451.8

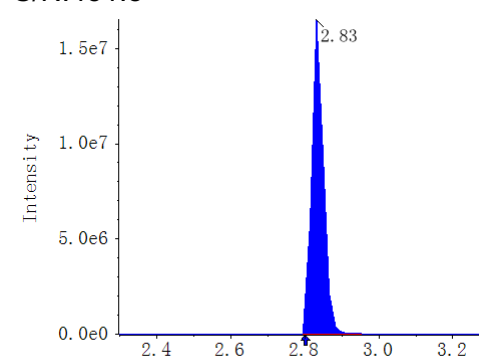

**A21233266b\_b**  
Nicotiflorin AREA:1.86e7  
S/N:410.5

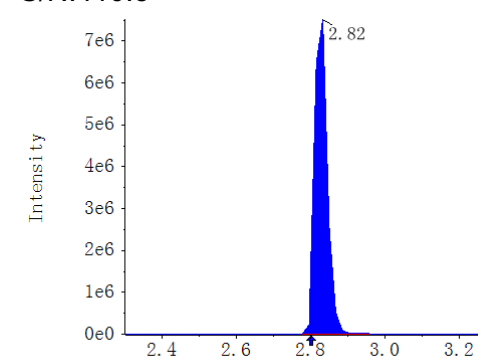

**A21233267b\_b**  
Nicotiflorin AREA:2.11e7  
S/N:390.4

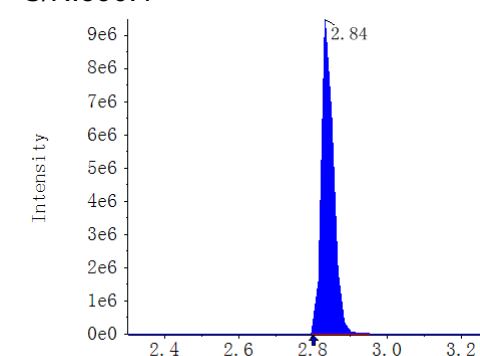

|                    |                                                    |                 |                      |
|--------------------|----------------------------------------------------|-----------------|----------------------|
| Result Table       | MWXS-21-2101D-3_18_WH6500-5_A20-3_V1.0_TY_20211028 | Algorithm Used  | MQ4                  |
| Acquisition Method | Flavonoids_V1.0_WH6500-5_LT_20211025.dam           | Instrument Name | QTRAP 6500+ Low Mass |
| Project            | N/A                                                | Analytes QTY    | 204:45               |

**Compound name: Rutin (609.1 / 300.0)**

| Sample Name           | Sample Type     | Area (cps) | Is Area (cps) | RT (min) | S/N   | Target Conc | Calculated Conc.() |
|-----------------------|-----------------|------------|---------------|----------|-------|-------------|--------------------|
| STD_0.5nM             | Standard        | 3.92e4     | N/A           | 2.64     | 58.1  | 0.5000      | 4.615796e-1        |
| STD_1nM               | Standard        | 4.42e4     | N/A           | 2.63     | 68.4  | 1.0000      | 8.993578e-1        |
| STD_5nM               | Standard        | 1.09e5     | N/A           | 2.63     | 97.8  | 5.0000      | 6.573130e0         |
| STD_10nM              | Standard        | 1.41e5     | N/A           | 2.63     | 143.8 | 10.0000     | 9.385678e0         |
| STD_20nM              | Standard        | 2.52e5     | N/A           | 2.63     | 141.8 | 20.0000     | 1.910764e1         |
| STD_50nM              | Standard        | 5.88e5     | N/A           | 2.63     | 187.0 | 50.0000     | 4.867384e1         |
| STD_100nM             | Standard        | 1.15e6     | N/A           | 2.64     | 212.0 | 100.0000    | 9.768732e1         |
| STD_200nM             | Standard        | 2.35e6     | N/A           | 2.63     | 200.6 | 200.0000    | 2.037115e2         |
| STD_500nM             | Standard        | N/A        | N/A           | N/A      | N/A   | 500.0000    | N/A                |
| STD_1000nM            | Standard        | N/A        | N/A           | N/A      | N/A   | 1000.0000   | N/A                |
| STD_2000nM            | Standard        | N/A        | N/A           | N/A      | N/A   | 2000.0000   | N/A                |
| V1.0_MW_RQC1_20211018 | Quality Control | 8.20e5     | N/A           | 2.63     | 137.7 | 0.0000      | 6.901856e1         |
| Blank                 | Unknown         | N/A        | N/A           | N/A      | N/A   | N/A         | N/A                |
| V1.0_MWMS_20211021_1  | Unknown         | 1.97e6     | N/A           | 2.64     | 219.5 | N/A         | 1.700358e2         |
| MWXS212101D3_R1       | Quality Control | 1.92e6     | N/A           | 2.63     | 225.7 | 0.0000      | 1.657062e2         |
| MWXS212101D3_R2       | Quality Control | 1.86e6     | N/A           | 2.64     | 239.2 | 0.0000      | 1.604887e2         |
| MWXS212101D3_R3       | Quality Control | 1.98e6     | N/A           | 2.63     | 257.7 | 0.0000      | 1.708168e2         |
| A21233250b_b          | Unknown         | 9.53e7     | N/A           | 2.63     | 401.0 | N/A         | 8.366871e3         |
| A21233251b_b          | Unknown         | 1.54e8     | N/A           | 2.64     | 379.4 | N/A         | 1.353091e4         |
| A21233252b_b          | Unknown         | 1.38e8     | N/A           | 2.64     | 348.9 | N/A         | 1.211033e4         |
| A21233253b_b          | Unknown         | 1.39e8     | N/A           | 2.64     | 320.4 | N/A         | 1.217566e4         |
| A21233254b_b          | Unknown         | 1.21e8     | N/A           | 2.63     | 339.7 | N/A         | 1.058986e4         |
| A21233255b_b          | Unknown         | 1.17e8     | N/A           | 2.64     | 382.7 | N/A         | 1.025373e4         |
| A21233256b_b          | Unknown         | 1.13e8     | N/A           | 2.64     | 378.7 | N/A         | 9.909270e3         |
| A21233257b_b          | Unknown         | 1.23e8     | N/A           | 2.64     | 346.9 | N/A         | 1.081551e4         |
| A21233258b_b          | Unknown         | 9.90e7     | N/A           | 2.64     | 371.4 | N/A         | 8.687132e3         |
| A21233259b_b          | Unknown         | 3.74e7     | N/A           | 2.64     | 401.6 | N/A         | 3.282487e3         |
| A21233260b_b          | Unknown         | 1.05e8     | N/A           | 2.64     | 396.0 | N/A         | 9.225258e3         |
| A21233261b_b          | Unknown         | 7.87e7     | N/A           | 2.64     | 384.3 | N/A         | 6.908030e3         |
| A21233262b_b          | Unknown         | 6.94e7     | N/A           | 2.64     | 374.3 | N/A         | 6.090564e3         |
| A21233263b_b          | Unknown         | 1.19e8     | N/A           | 2.63     | 386.0 | N/A         | 1.045570e4         |
| A21233264b_b          | Unknown         | 9.22e7     | N/A           | 2.64     | 366.4 | N/A         | 8.090494e3         |
| A21233265b_b          | Unknown         | 1.19e8     | N/A           | 2.64     | 331.0 | N/A         | 1.044263e4         |
| A21233266b_b          | Unknown         | 1.02e8     | N/A           | 2.63     | 356.4 | N/A         | 8.911181e3         |
| A21233267b_b          | Unknown         | 9.83e7     | N/A           | 2.64     | 367.3 | N/A         | 8.629191e3         |

Compound name: Rutin

Regression Equation:  $y = 11389.72468x + 3.39152e4$  ( $r = 0.99899$ ) (weighting:  $1/x$ )

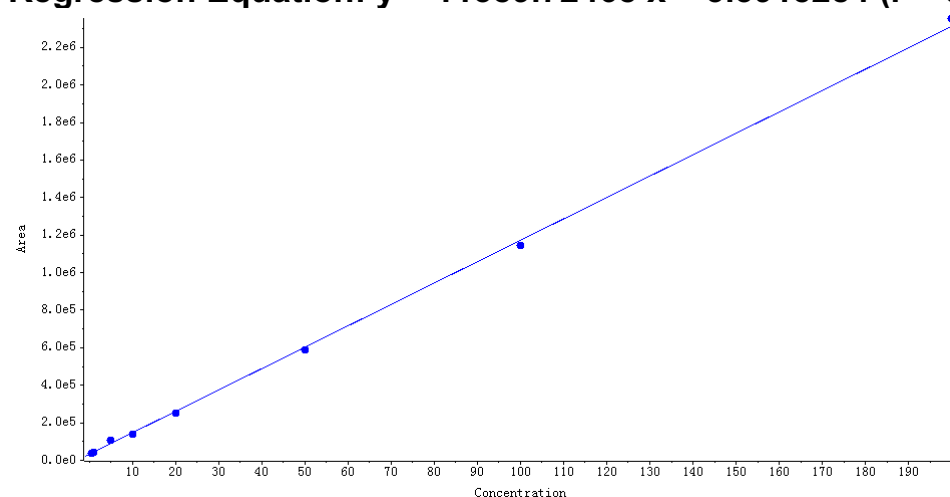

## Peak Review

Blank

Rutin AREA:N/A S/N:N/A

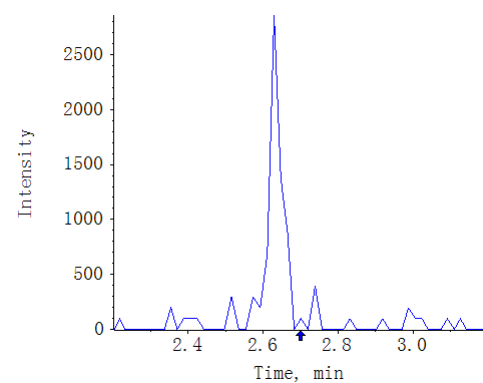

V1.0\_MWMS\_20211021\_1

Rutin AREA:1.97e6 S/N:219.5

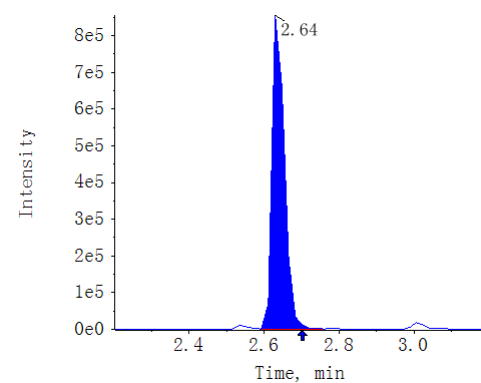

A21233250b\_b

Rutin AREA:9.53e7 S/N:401.0

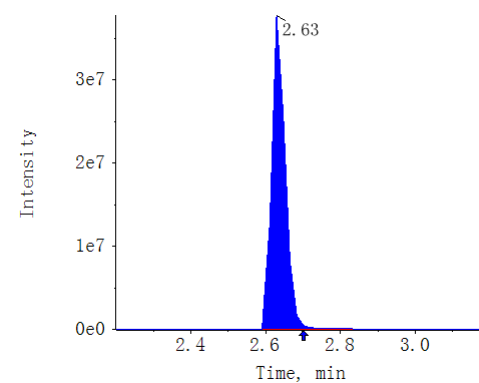

A21233251b\_b

Rutin AREA:1.54e8 S/N:379.4

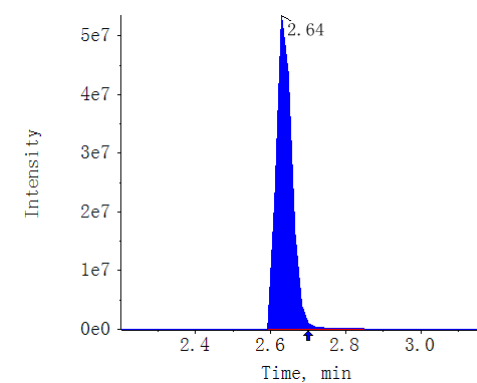

A21233252b\_b

Rutin AREA:1.38e8 S/N:348.9

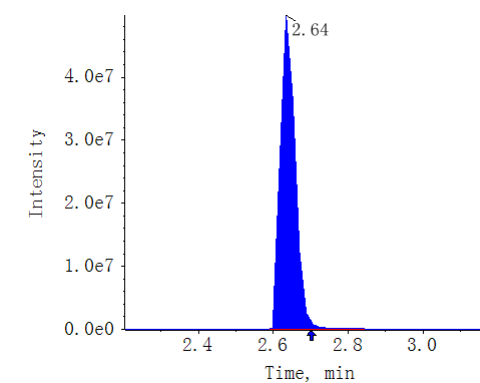

A21233253b\_b

Rutin AREA:1.39e8 S/N:320.4

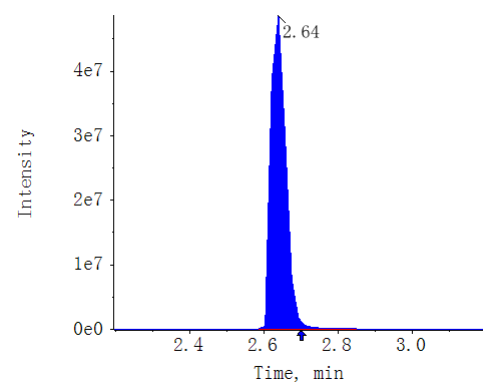

A21233254b\_b

Rutin AREA:1.21e8 S/N:339.7

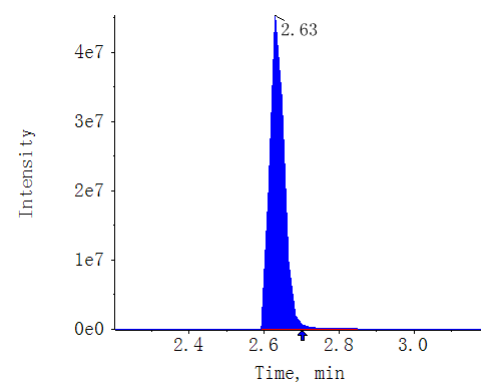

A21233255b\_b

Rutin AREA:1.17e8 S/N:382.7

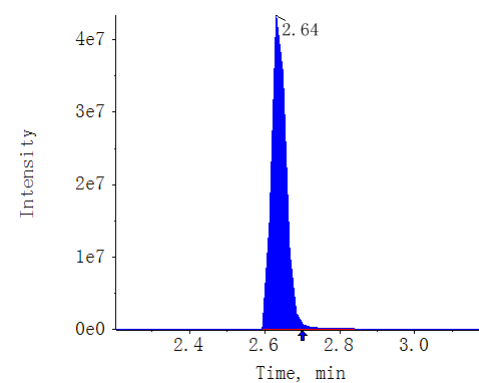

A21233256b\_b

Rutin AREA:1.13e8 S/N:378.7

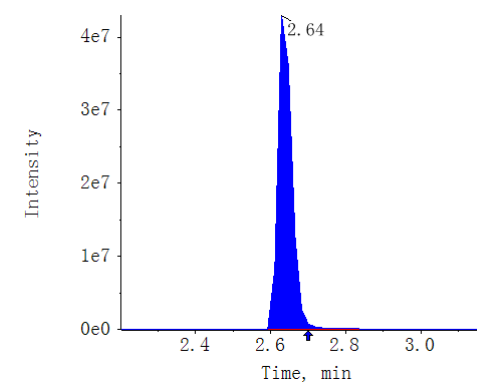

A21233257b\_b

Rutin AREA:1.23e8 S/N:346.9

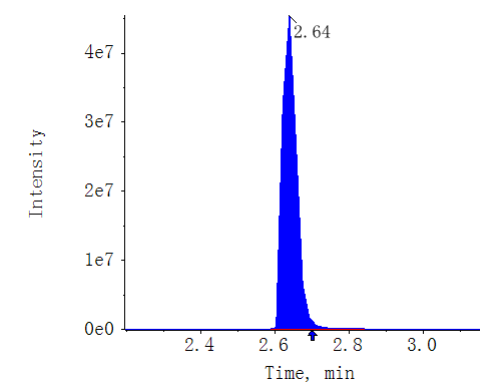

**A21233258b\_b**  
Rutin AREA:9.90e7 S/N:371.4

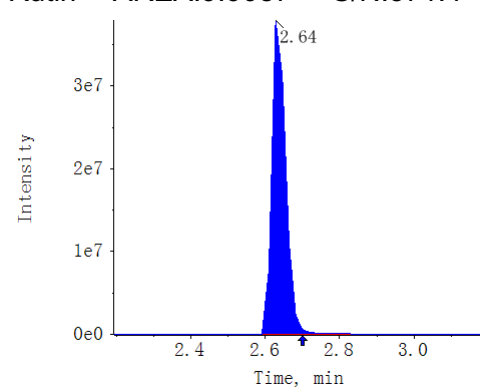

**A21233259b\_b**  
Rutin AREA:3.74e7 S/N:401.6

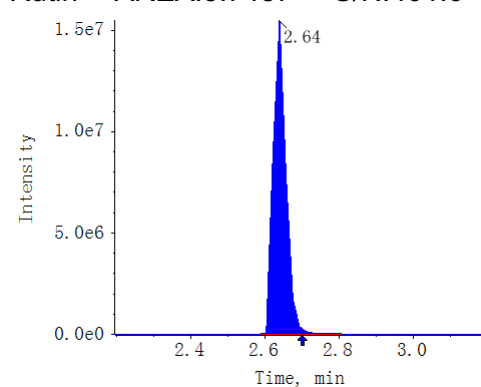

**A21233260b\_b**  
Rutin AREA:1.05e8 S/N:396.0

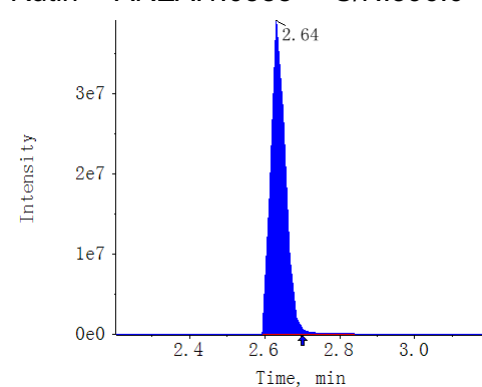

**A21233261b\_b**  
Rutin AREA:7.87e7 S/N:384.3

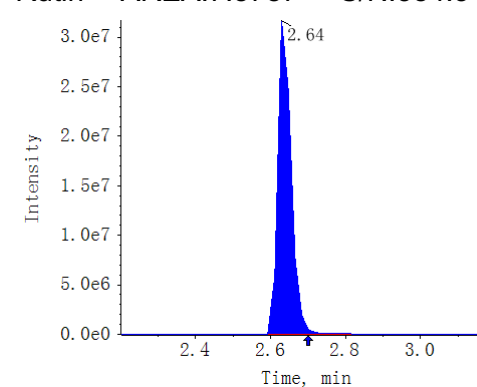

**A21233262b\_b**  
Rutin AREA:6.94e7 S/N:374.3

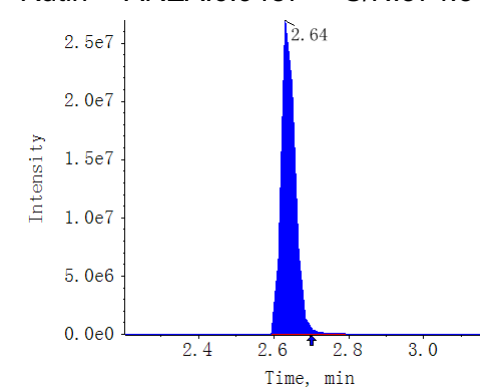

**A21233263b\_b**  
Rutin AREA:1.19e8 S/N:386.0

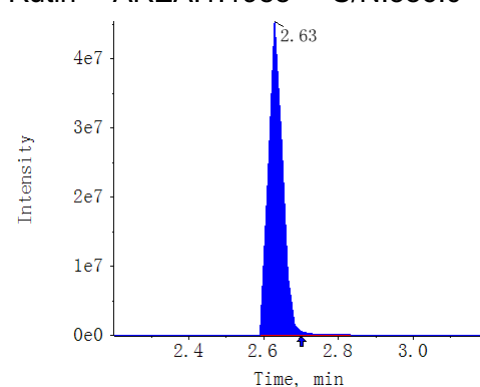

**A21233264b\_b**  
Rutin AREA:9.22e7 S/N:366.4

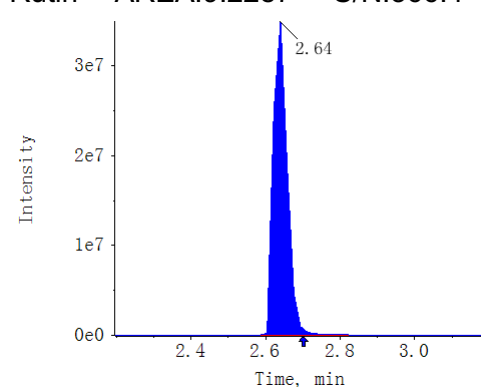

**A21233265b\_b**  
Rutin AREA:1.19e8 S/N:331.0

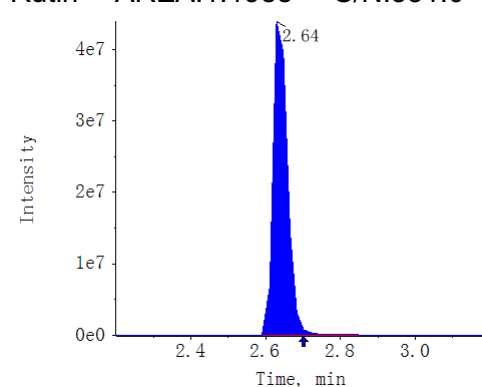

**A21233266b\_b**  
Rutin AREA:1.02e8 S/N:356.4

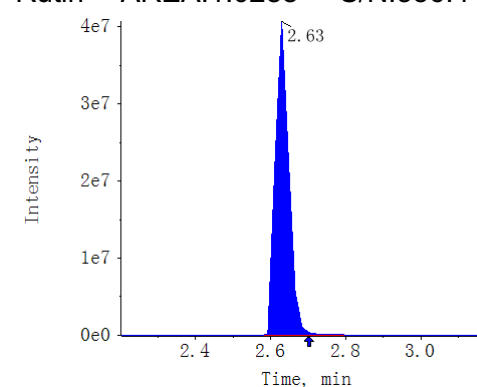

**A21233267b\_b**  
Rutin AREA:9.83e7 S/N:367.3

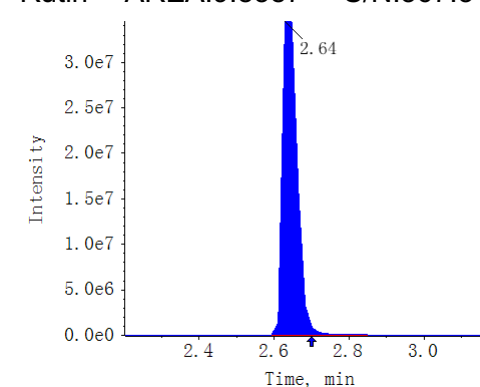

|                    |                                                    |                 |                      |
|--------------------|----------------------------------------------------|-----------------|----------------------|
| Result Table       | MWXS-21-2101D-3_18_WH6500-5_A20-3_V1.0_TY_20211028 | Algorithm Used  | MQ4                  |
| Acquisition Method | Flavonoids_V1.0_WH6500-5_LT_20211025.dam           | Instrument Name | QTRAP 6500+ Low Mass |
| Project            | N/A                                                | Analytes QTY    | 204:53               |

**Compound name: Phlorizin (435.1 / 273.1)**

| Sample Name           | Sample Type     | Area (cps) | Is Area (cps) | RT (min) | S/N   | Target Conc | Calculated Conc.() |
|-----------------------|-----------------|------------|---------------|----------|-------|-------------|--------------------|
| STD_0.5nM             | Standard        | 7.41e3     | N/A           | 3.27     | 34.4  | 0.5000      | 3.382499e-1        |
| STD_1nM               | Standard        | 1.61e4     | N/A           | 3.27     | 44.4  | 1.0000      | 8.166601e-1        |
| STD_5nM               | Standard        | 1.36e5     | N/A           | 3.27     | 88.4  | 5.0000      | 7.411817e0         |
| STD_10nM              | Standard        | 1.82e5     | N/A           | 3.27     | 150.0 | 10.0000     | 9.953311e0         |
| STD_20nM              | Standard        | 3.76e5     | N/A           | 3.26     | 161.3 | 20.0000     | 2.063693e1         |
| STD_50nM              | Standard        | 9.29e5     | N/A           | 3.27     | 208.7 | 50.0000     | 5.105564e1         |
| STD_100nM             | Standard        | 1.80e6     | N/A           | 3.28     | 157.6 | 100.0000    | 9.894983e1         |
| STD_200nM             | Standard        | 3.59e6     | N/A           | 3.27     | 144.7 | 200.0000    | 1.973376e2         |
| STD_500nM             | Standard        | N/A        | N/A           | N/A      | N/A   | 500.0000    | N/A                |
| STD_1000nM            | Standard        | N/A        | N/A           | N/A      | N/A   | 1000.0000   | N/A                |
| STD_2000nM            | Standard        | N/A        | N/A           | N/A      | N/A   | 2000.0000   | N/A                |
| V1.0_MW_RQC1_20211018 | Quality Control | 1.71e4     | N/A           | 3.27     | 4.4   | 0.0000      | 8.733864e-1        |
| Blank                 | Unknown         | N/A        | N/A           | N/A      | N/A   | N/A         | N/A                |
| V1.0_MWMS_20211021_1  | Unknown         | 3.00e6     | N/A           | 3.28     | 210.4 | N/A         | 1.648067e2         |
| MWXS212101D3_R1       | Quality Control | 3.14e6     | N/A           | 3.28     | 181.0 | 0.0000      | 1.725797e2         |
| MWXS212101D3_R2       | Quality Control | 3.08e6     | N/A           | 3.28     | 176.4 | 0.0000      | 1.694434e2         |
| MWXS212101D3_R3       | Quality Control | 2.94e6     | N/A           | 3.28     | 193.6 | 0.0000      | 1.618024e2         |
| A21233250b_b          | Unknown         | 1.30e4     | N/A           | 3.28     | 5.3   | N/A         | 6.469493e-1        |
| A21233251b_b          | Unknown         | 1.87e4     | N/A           | 3.28     | 10.5  | N/A         | 9.590136e-1        |
| A21233252b_b          | Unknown         | 3.33e4     | N/A           | 3.28     | 15.8  | N/A         | 1.764722e0         |
| A21233253b_b          | Unknown         | 9.72e4     | N/A           | 3.28     | 10.5  | N/A         | 5.276954e0         |
| A21233254b_b          | Unknown         | 7.11e4     | N/A           | 3.28     | 9.4   | N/A         | 3.844152e0         |
| A21233255b_b          | Unknown         | 9.11e4     | N/A           | 3.28     | 10.3  | N/A         | 4.944571e0         |
| A21233256b_b          | Unknown         | 1.73e5     | N/A           | 3.28     | 9.7   | N/A         | 9.429290e0         |
| A21233257b_b          | Unknown         | 1.89e5     | N/A           | 3.28     | 8.2   | N/A         | 1.034601e1         |
| A21233258b_b          | Unknown         | 1.77e5     | N/A           | 3.28     | 10.8  | N/A         | 9.692834e0         |
| A21233259b_b          | Unknown         | 6.27e3     | N/A           | 3.28     | 3.8   | N/A         | 2.754643e-1        |
| A21233260b_b          | Unknown         | 1.14e4     | N/A           | 3.28     | 8.4   | N/A         | 5.555841e-1        |
| A21233261b_b          | Unknown         | 6.17e3     | N/A           | 3.28     | 3.0   | N/A         | 2.700232e-1        |
| A21233262b_b          | Unknown         | 2.22e4     | N/A           | 3.28     | 6.8   | N/A         | 1.151978e0         |
| A21233263b_b          | Unknown         | 9.88e4     | N/A           | 3.28     | 8.5   | N/A         | 5.367983e0         |
| A21233264b_b          | Unknown         | 6.87e4     | N/A           | 3.28     | 9.7   | N/A         | 3.708383e0         |
| A21233265b_b          | Unknown         | 2.13e5     | N/A           | 3.28     | 9.6   | N/A         | 1.164980e1         |
| A21233266b_b          | Unknown         | 1.84e5     | N/A           | 3.27     | 11.0  | N/A         | 1.005688e1         |
| A21233267b_b          | Unknown         | 2.62e5     | N/A           | 3.29     | 12.7  | N/A         | 1.432242e1         |

Compound name: Phlorizin  
Regression Equation:  $y = 18173.36711x + 1265.23169$  ( $r = 0.99818$ ) (weighting:  $1/x$ )

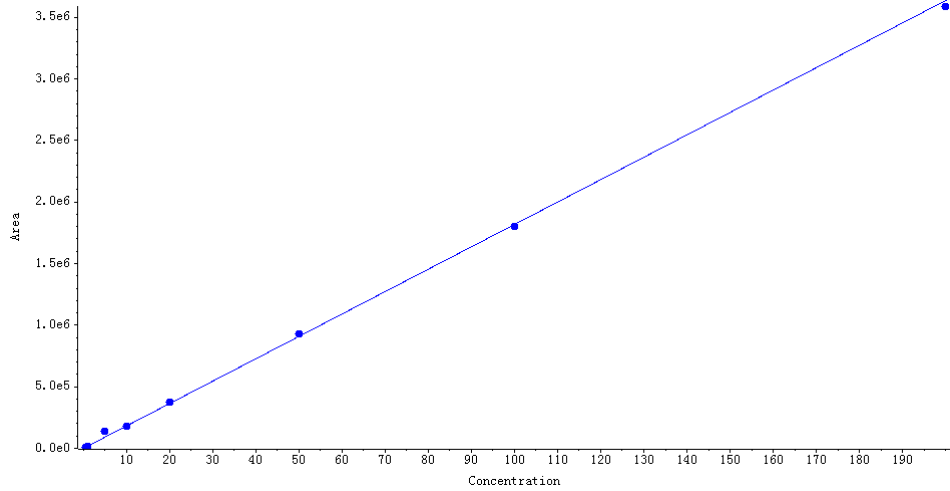

Peak Review

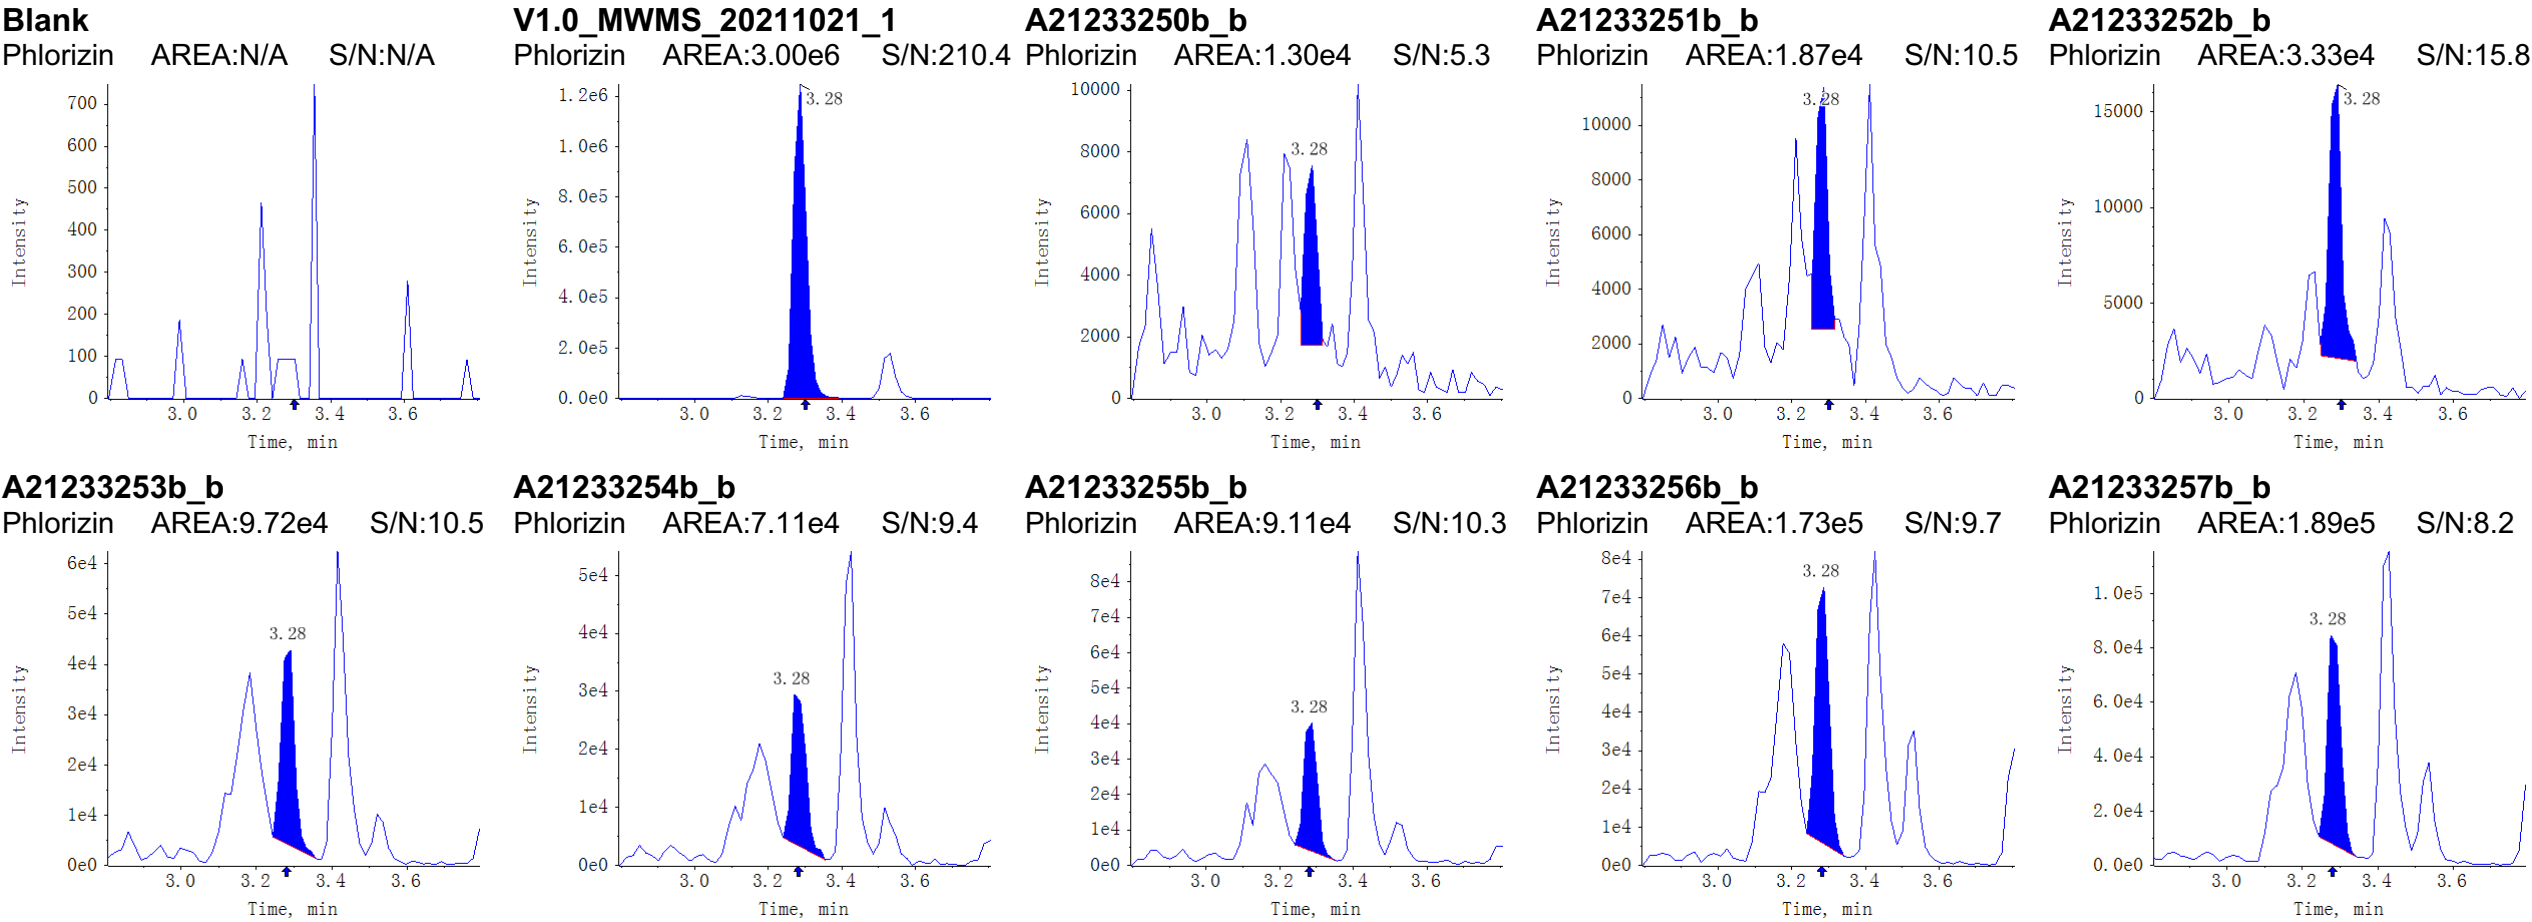

**A21233258b\_b**

Phlorizin AREA:1.77e5 S/N:10.8

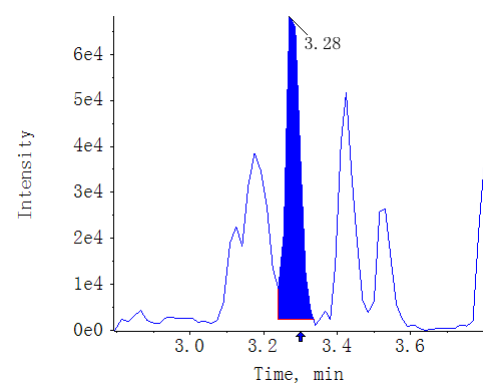

**A21233259b\_b**

Phlorizin AREA:6.27e3 S/N:3.8

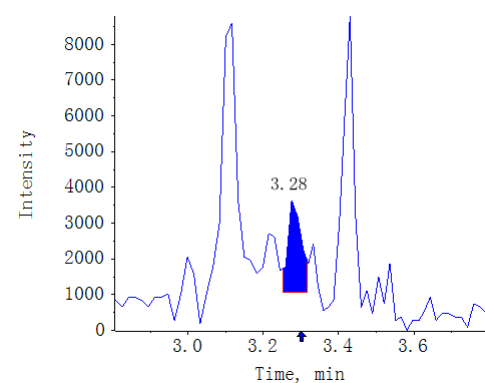

**A21233260b\_b**

Phlorizin AREA:1.14e4 S/N:8.4

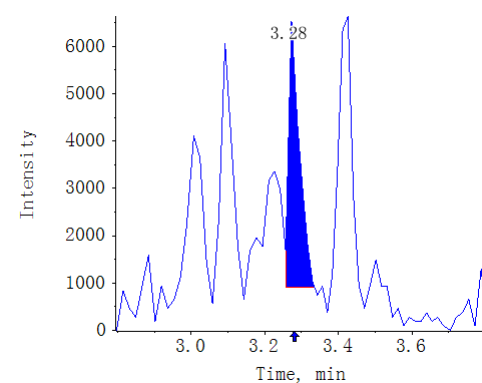

**A21233261b\_b**

Phlorizin AREA:6.17e3 S/N:3.0

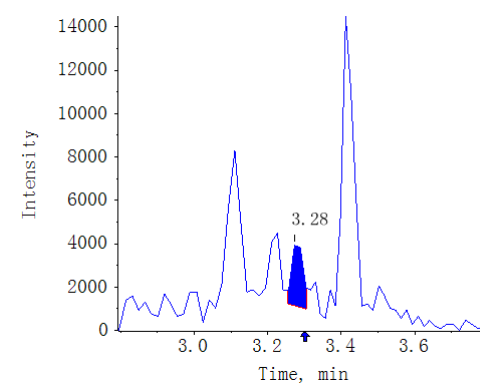

**A21233262b\_b**

Phlorizin AREA:2.22e4 S/N:6.8

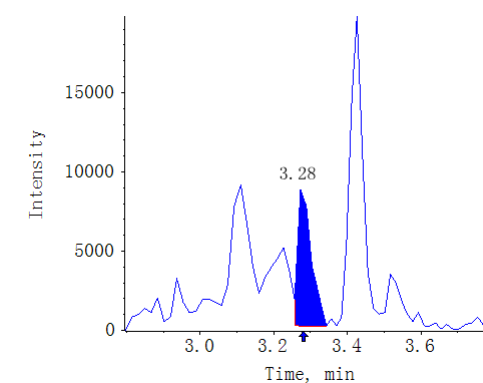

**A21233263b\_b**

Phlorizin AREA:9.88e4 S/N:8.5

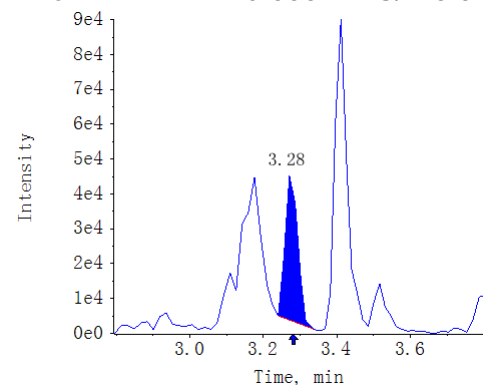

**A21233264b\_b**

Phlorizin AREA:6.87e4 S/N:9.7

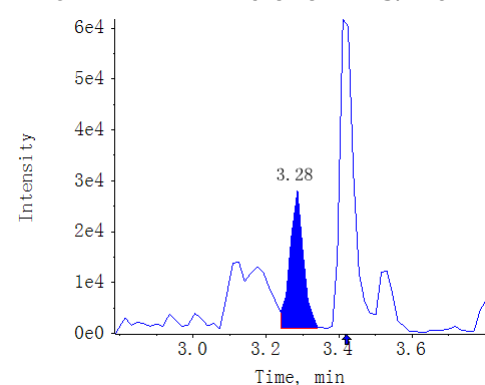

**A21233265b\_b**

Phlorizin AREA:2.13e5 S/N:9.6

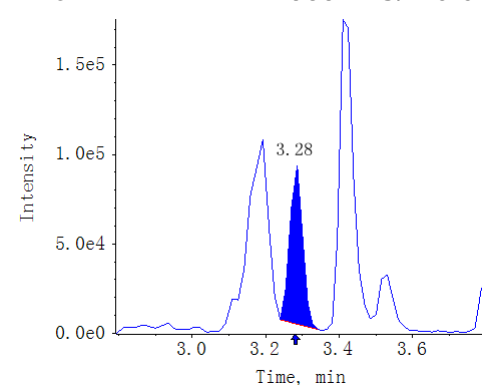

**A21233266b\_b**

Phlorizin AREA:1.84e5 S/N:11.0

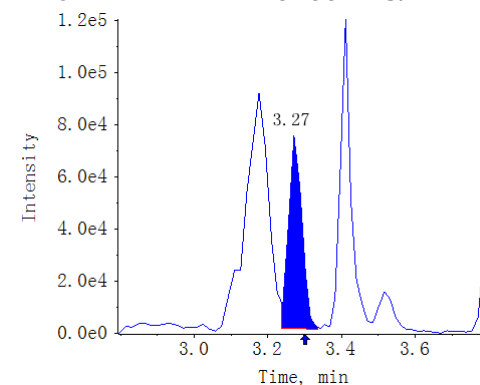

**A21233267b\_b**

Phlorizin AREA:2.62e5 S/N:12.7

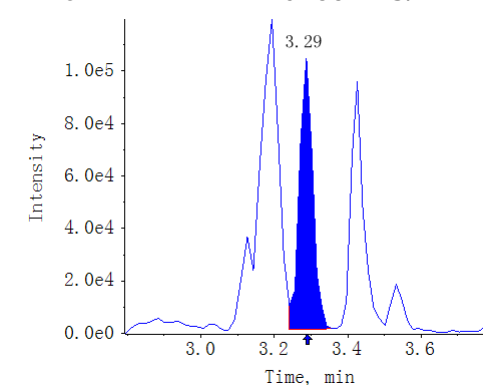

|                    |                                                    |                 |                      |
|--------------------|----------------------------------------------------|-----------------|----------------------|
| Result Table       | MWXS-21-2101D-3_18_WH6500-5_A20-3_V1.0_TY_20211028 | Algorithm Used  | MQ4                  |
| Acquisition Method | Flavonoids_V1.0_WH6500-5_LT_20211025.dam           | Instrument Name | QTRAP 6500+ Low Mass |
| Project            | N/A                                                | Analytes QTY    | 204:57               |

**Compound name: Liquiritin (417.1 / 255.1)**

| Sample Name           | Sample Type     | Area (cps) | Is Area (cps) | RT (min) | S/N   | Target Conc | Calculated Conc.() |
|-----------------------|-----------------|------------|---------------|----------|-------|-------------|--------------------|
| STD_0.5nM             | Standard        | 1.01e4     | N/A           | 2.79     | 43.6  | 0.5000      | 4.429427e-1        |
| STD_1nM               | Standard        | 1.37e4     | N/A           | 2.78     | 51.7  | 1.0000      | 6.563204e-1        |
| STD_5nM               | Standard        | 1.20e5     | N/A           | 2.79     | 150.4 | 5.0000      | 7.066923e0         |
| STD_10nM              | Standard        | 1.71e5     | N/A           | 2.79     | 231.7 | 10.0000     | 1.015961e1         |
| STD_20nM              | Standard        | 3.37e5     | N/A           | 2.79     | 312.9 | 20.0000     | 2.016430e1         |
| STD_50nM              | Standard        | 8.75e5     | N/A           | 2.79     | 342.9 | 50.0000     | 5.269262e1         |
| STD_100nM             | Standard        | 1.62e6     | N/A           | 2.79     | 496.8 | 100.0000    | 9.795901e1         |
| STD_200nM             | Standard        | 3.27e6     | N/A           | 2.78     | 487.7 | 200.0000    | 1.973583e2         |
| STD_500nM             | Standard        | N/A        | N/A           | N/A      | N/A   | 500.0000    | N/A                |
| STD_1000nM            | Standard        | N/A        | N/A           | N/A      | N/A   | 1000.0000   | N/A                |
| STD_2000nM            | Standard        | N/A        | N/A           | N/A      | N/A   | 2000.0000   | N/A                |
| V1.0_MW_RQC1_20211018 | Quality Control | N/A        | N/A           | N/A      | N/A   | 0.0000      | N/A                |
| Blank                 | Unknown         | N/A        | N/A           | N/A      | N/A   | N/A         | N/A                |
| V1.0_MWMS_20211021_1  | Unknown         | 2.68e6     | N/A           | 2.80     | 463.7 | N/A         | 1.615042e2         |
| MWXS212101D3_R1       | Quality Control | 2.76e6     | N/A           | 2.79     | 503.3 | 0.0000      | 1.663836e2         |
| MWXS212101D3_R2       | Quality Control | 2.67e6     | N/A           | 2.80     | 430.3 | 0.0000      | 1.609183e2         |
| MWXS212101D3_R3       | Quality Control | 2.61e6     | N/A           | 2.79     | 386.9 | 0.0000      | 1.572545e2         |
| A21233250b_b          | Unknown         | 1.32e4     | N/A           | 2.72     | 8.1   | N/A         | 6.307933e-1        |
| A21233251b_b          | Unknown         | 6.24e3     | N/A           | 2.72     | 5.5   | N/A         | 2.076943e-1        |
| A21233252b_b          | Unknown         | 8.05e3     | N/A           | 2.72     | 5.3   | N/A         | 3.172114e-1        |
| A21233253b_b          | Unknown         | 2.02e4     | N/A           | 2.71     | 8.9   | N/A         | 1.052724e0         |
| A21233254b_b          | Unknown         | 1.88e4     | N/A           | 2.72     | 8.7   | N/A         | 9.670657e-1        |
| A21233255b_b          | Unknown         | 2.34e4     | N/A           | 2.71     | 10.0  | N/A         | 1.245643e0         |
| A21233256b_b          | Unknown         | 2.14e4     | N/A           | 2.72     | 4.5   | N/A         | 1.125849e0         |
| A21233257b_b          | Unknown         | 3.18e4     | N/A           | 2.73     | 3.4   | N/A         | 1.749890e0         |
| A21233258b_b          | Unknown         | 1.48e4     | N/A           | 2.72     | 1.8   | N/A         | 7.259021e-1        |
| A21233259b_b          | Unknown         | 7.09e3     | N/A           | 2.73     | 5.1   | N/A         | 2.592523e-1        |
| A21233260b_b          | Unknown         | 8.31e3     | N/A           | 2.70     | 8.6   | N/A         | 3.328778e-1        |
| A21233261b_b          | Unknown         | 1.04e4     | N/A           | 2.72     | 8.1   | N/A         | 4.568581e-1        |
| A21233262b_b          | Unknown         | 1.46e4     | N/A           | 2.72     | 9.1   | N/A         | 7.111704e-1        |
| A21233263b_b          | Unknown         | 2.06e4     | N/A           | 2.71     | 9.5   | N/A         | 1.072169e0         |
| A21233264b_b          | Unknown         | 1.92e4     | N/A           | 2.71     | 7.7   | N/A         | 9.874053e-1        |
| A21233265b_b          | Unknown         | 2.44e4     | N/A           | 2.71     | 5.7   | N/A         | 1.304340e0         |
| A21233266b_b          | Unknown         | 2.14e4     | N/A           | 2.71     | 6.0   | N/A         | 1.120571e0         |
| A21233267b_b          | Unknown         | 2.47e4     | N/A           | 2.71     | 3.5   | N/A         | 1.323846e0         |

Compound name: Liquiritin

Regression Equation:  $y = 16559.77809x + 2799.66502$  ( $r = 0.99837$ ) (weighting:  $1/x$ )

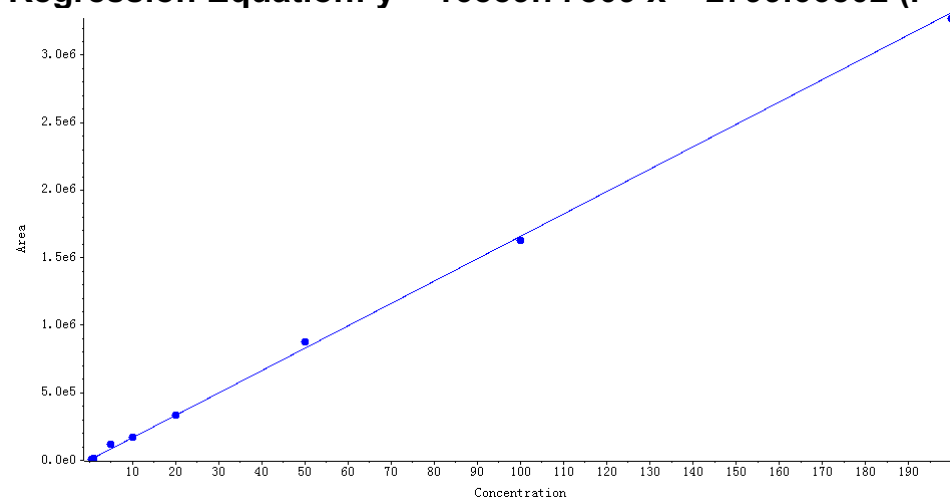

### Peak Review

Blank

Liquiritin AREA:N/A S/N:N/A

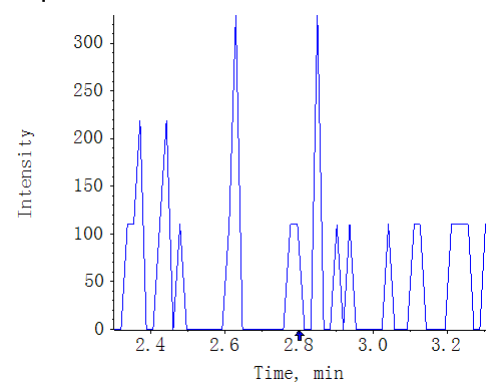

V1.0\_MWMS\_20211021\_1

Liquiritin AREA:2.68e6 S/N:463.7

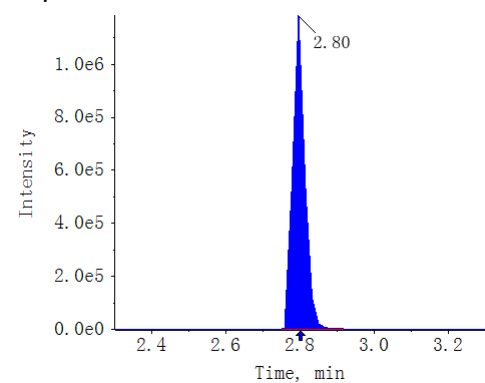

A21233250b\_b

Liquiritin AREA:1.32e4 S/N:8.1

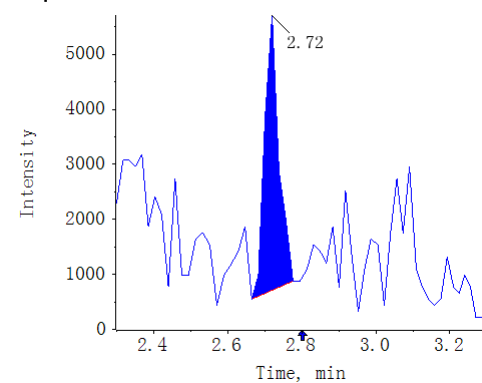

A21233251b\_b

Liquiritin AREA:6.24e3 S/N:5.5

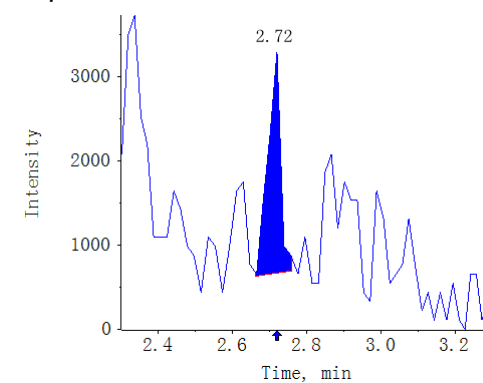

A21233252b\_b

Liquiritin AREA:8.05e3 S/N:5.3

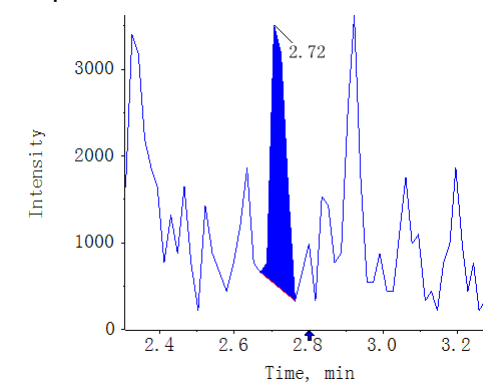

A21233253b\_b

Liquiritin AREA:2.02e4 S/N:8.9

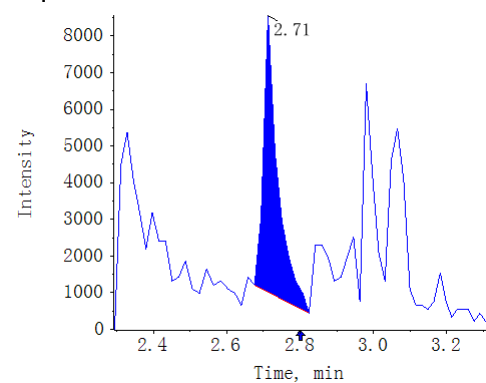

A21233254b\_b

Liquiritin AREA:1.88e4 S/N:8.7

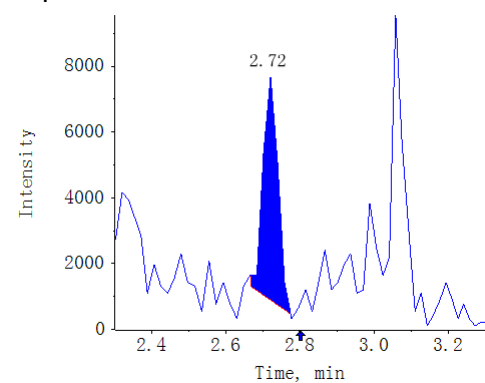

A21233255b\_b

Liquiritin AREA:2.34e4 S/N:10.0

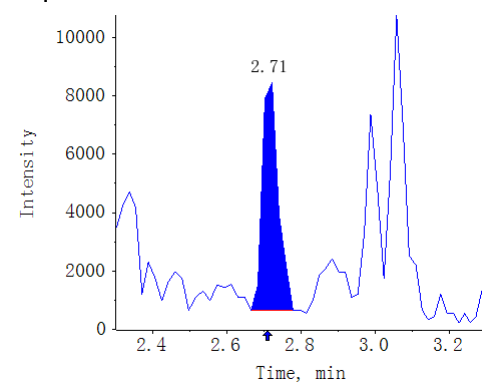

A21233256b\_b

Liquiritin AREA:2.14e4 S/N:4.5

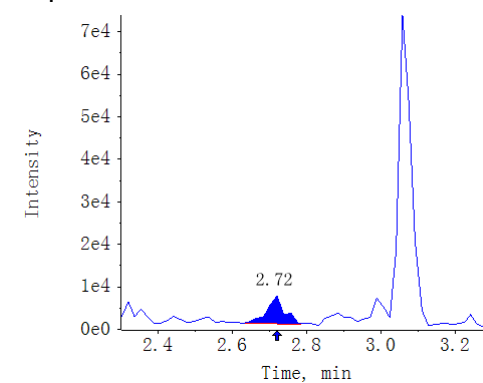

A21233257b\_b

Liquiritin AREA:3.18e4 S/N:3.4

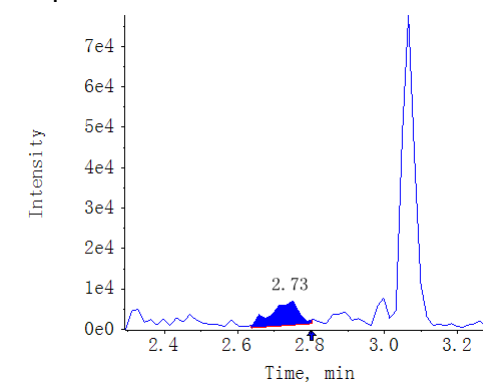

**A21233258b\_b**

Liquiritin AREA:1.48e4 S/N:1.8

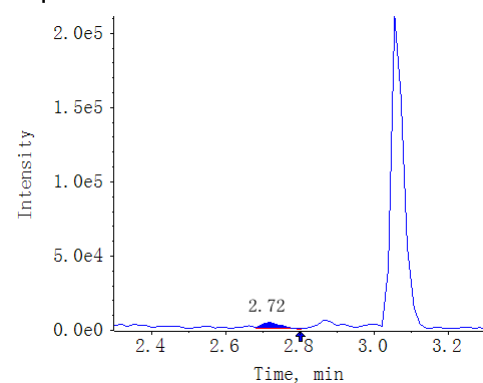

**A21233259b\_b**

Liquiritin AREA:7.09e3 S/N:5.1

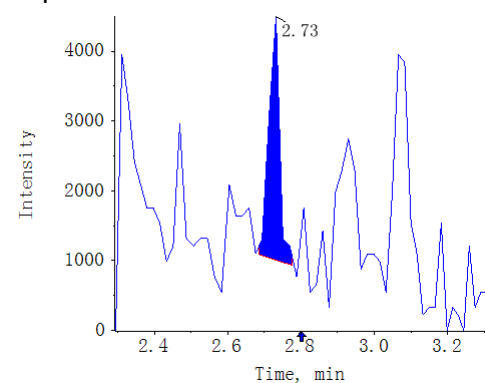

**A21233260b\_b**

Liquiritin AREA:8.31e3 S/N:8.6

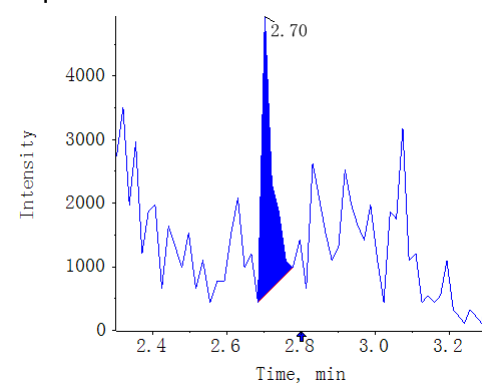

**A21233261b\_b**

Liquiritin AREA:1.04e4 S/N:8.1

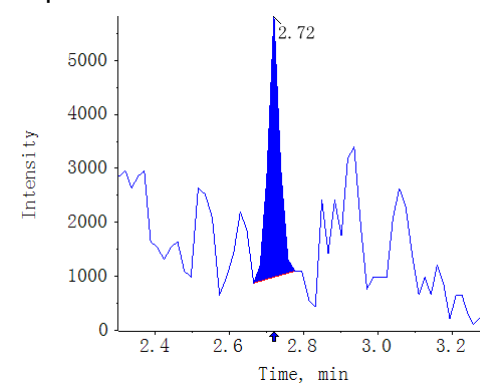

**A21233262b\_b**

Liquiritin AREA:1.46e4 S/N:9.1

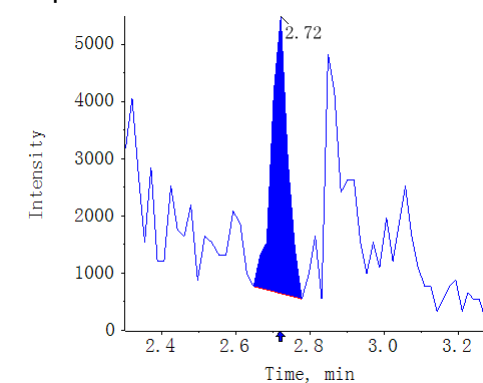

**A21233263b\_b**

Liquiritin AREA:2.06e4 S/N:9.5

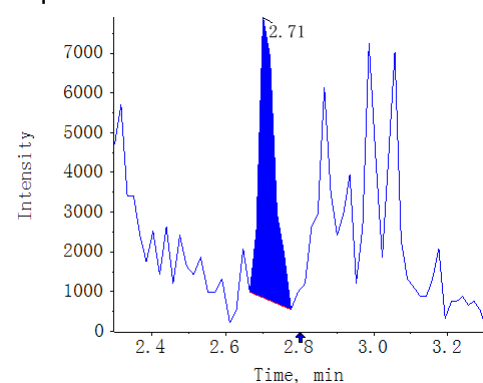

**A21233264b\_b**

Liquiritin AREA:1.92e4 S/N:7.7

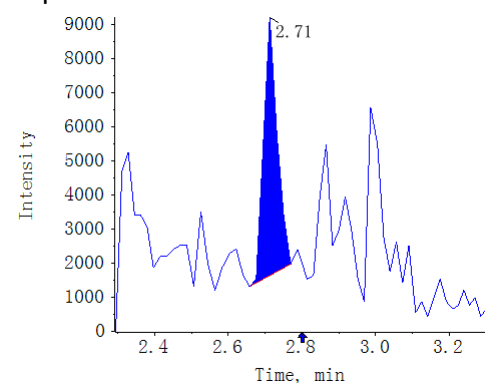

**A21233265b\_b**

Liquiritin AREA:2.44e4 S/N:5.7

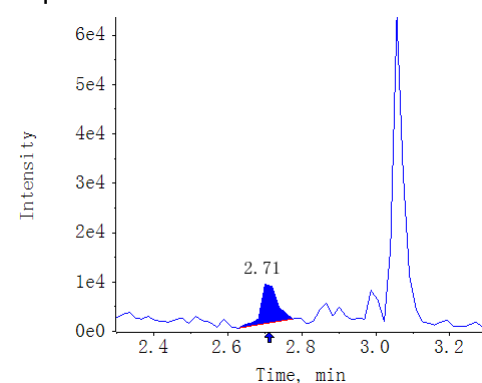

**A21233266b\_b**

Liquiritin AREA:2.14e4 S/N:6.0

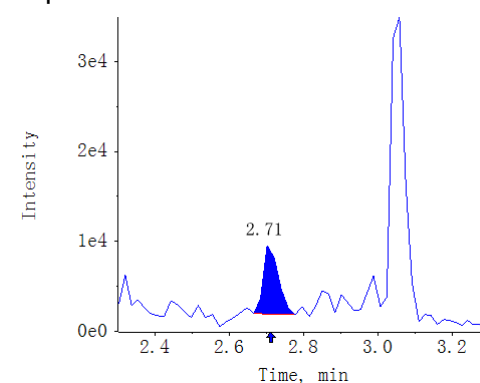

**A21233267b\_b**

Liquiritin AREA:2.47e4 S/N:3.5

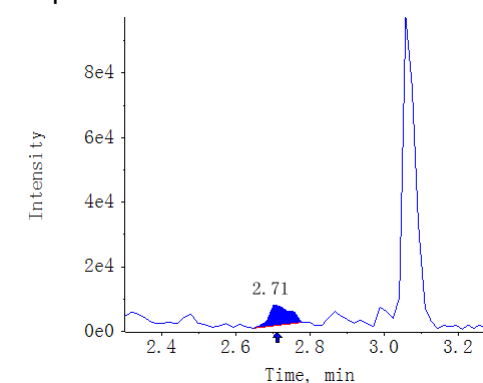

|                    |                                                    |                 |                      |
|--------------------|----------------------------------------------------|-----------------|----------------------|
| Result Table       | MWXS-21-2101D-3_18_WH6500-5_A20-3_V1.0_TY_20211028 | Algorithm Used  | MQ4                  |
| Acquisition Method | Flavonoids_V1.0_WH6500-5_LT_20211025.dam           | Instrument Name | QTRAP 6500+ Low Mass |
| Project            | N/A                                                | Analytes QTY    | 204:67               |

**Compound name: (-)-Gallocatechin gallate (457.1 / 169.0)**

| Sample Name           | Sample Type     | Area (cps) | Is Area (cps) | RT (min) | S/N   | Target Conc | Calculated Conc.() |
|-----------------------|-----------------|------------|---------------|----------|-------|-------------|--------------------|
| STD_0.5nM             | Standard        | 2.39e3     | N/A           | 2.48     | 16.3  | 0.5000      | 3.442252e-1        |
| STD_1nM               | Standard        | 6.07e3     | N/A           | 2.46     | 21.8  | 1.0000      | 1.172144e0         |
| STD_5nM               | Standard        | 3.20e4     | N/A           | 2.46     | 75.4  | 5.0000      | 7.003963e0         |
| STD_10nM              | Standard        | 3.57e4     | N/A           | 2.46     | 114.8 | 10.0000     | 7.841150e0         |
| STD_20nM              | Standard        | 8.03e4     | N/A           | 2.46     | 145.9 | 20.0000     | 1.786485e1         |
| STD_50nM              | Standard        | 2.43e5     | N/A           | 2.47     | 182.3 | 50.0000     | 5.436523e1         |
| STD_100nM             | Standard        | 4.32e5     | N/A           | 2.47     | 198.1 | 100.0000    | 9.688181e1         |
| STD_200nM             | Standard        | 8.95e5     | N/A           | 2.46     | 237.2 | 200.0000    | 2.010266e2         |
| STD_500nM             | Standard        | N/A        | N/A           | N/A      | N/A   | 500.0000    | N/A                |
| STD_1000nM            | Standard        | N/A        | N/A           | N/A      | N/A   | 1000.0000   | N/A                |
| STD_2000nM            | Standard        | N/A        | N/A           | N/A      | N/A   | 2000.0000   | N/A                |
| V1.0_MW_RQC1_20211018 | Quality Control | N/A        | N/A           | N/A      | N/A   | 0.0000      | N/A                |
| Blank                 | Unknown         | N/A        | N/A           | N/A      | N/A   | N/A         | N/A                |
| V1.0_MWMS_20211021_1  | Unknown         | 8.72e5     | N/A           | 2.47     | 257.2 | N/A         | 1.958754e2         |
| MWXS212101D3_R1       | Quality Control | 8.72e5     | N/A           | 2.46     | 242.7 | 0.0000      | 1.957943e2         |
| MWXS212101D3_R2       | Quality Control | 8.67e5     | N/A           | 2.47     | 206.4 | 0.0000      | 1.947021e2         |
| MWXS212101D3_R3       | Quality Control | 8.78e5     | N/A           | 2.47     | 227.7 | 0.0000      | 1.972904e2         |
| A21233250b_b          | Unknown         | 6.18e4     | N/A           | 2.40     | 82.4  | N/A         | 1.369487e1         |
| A21233251b_b          | Unknown         | 3.02e4     | N/A           | 2.40     | 44.1  | N/A         | 6.602019e0         |
| A21233252b_b          | Unknown         | 1.04e4     | N/A           | 2.40     | 17.7  | N/A         | 2.143998e0         |
| A21233253b_b          | Unknown         | 3.76e4     | N/A           | 2.40     | 45.1  | N/A         | 8.252535e0         |
| A21233254b_b          | Unknown         | 2.98e4     | N/A           | 2.40     | 40.3  | N/A         | 6.508010e0         |
| A21233255b_b          | Unknown         | 7.50e3     | N/A           | 2.39     | 8.1   | N/A         | 1.492935e0         |
| A21233256b_b          | Unknown         | 9.88e4     | N/A           | 2.41     | 73.4  | N/A         | 2.201878e1         |
| A21233257b_b          | Unknown         | 1.53e4     | N/A           | 2.41     | 20.0  | N/A         | 3.240187e0         |
| A21233258b_b          | Unknown         | 2.26e4     | N/A           | 2.41     | 22.8  | N/A         | 4.879153e0         |
| A21233259b_b          | Unknown         | 1.30e5     | N/A           | 2.40     | 110.7 | N/A         | 2.908768e1         |
| A21233260b_b          | Unknown         | 4.76e5     | N/A           | 2.40     | 205.2 | N/A         | 1.069284e2         |
| A21233261b_b          | Unknown         | 1.27e6     | N/A           | 2.40     | 278.9 | N/A         | 2.842444e2         |
| A21233262b_b          | Unknown         | 5.19e3     | N/A           | 2.40     | 11.9  | N/A         | 9.729736e-1        |
| A21233263b_b          | Unknown         | 4.33e4     | N/A           | 2.40     | 55.5  | N/A         | 9.541979e0         |
| A21233264b_b          | Unknown         | 1.44e5     | N/A           | 2.40     | 84.7  | N/A         | 3.216876e1         |
| A21233265b_b          | Unknown         | 1.69e4     | N/A           | 2.41     | 24.3  | N/A         | 3.603405e0         |
| A21233266b_b          | Unknown         | 3.11e4     | N/A           | 2.40     | 39.1  | N/A         | 6.800104e0         |
| A21233267b_b          | Unknown         | 1.98e4     | N/A           | 2.40     | 26.2  | N/A         | 4.248885e0         |

Compound name: (-)-Gallocatechin gallate

Regression Equation:  $y = 4447.50939x + 860.04244$  ( $r = 0.99721$ ) (weighting:  $1/x$ )

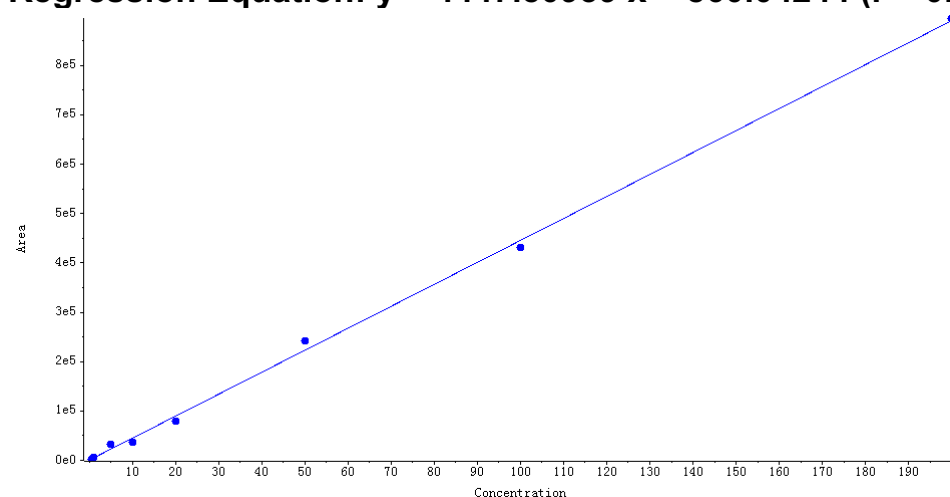

### Peak Review

#### Blank

(-)-Gallocatechin gallate AREA:N/A  
S/N:N/A

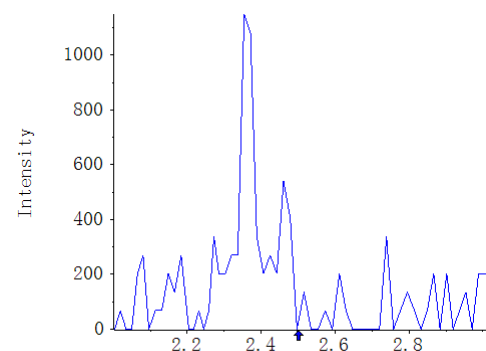

#### V1.0\_MWMS\_20211021\_1

(-)-Gallocatechin gallate AREA:8.72e5  
S/N:257.2

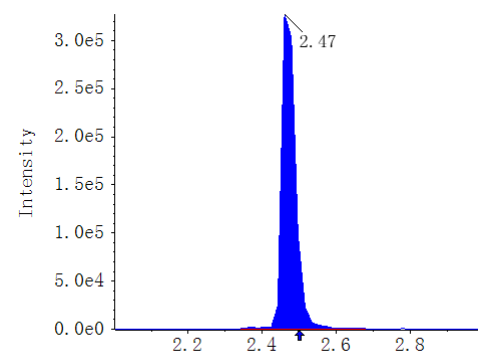

#### A21233250b\_b

(-)-Gallocatechin gallate AREA:6.18e4  
S/N:82.4

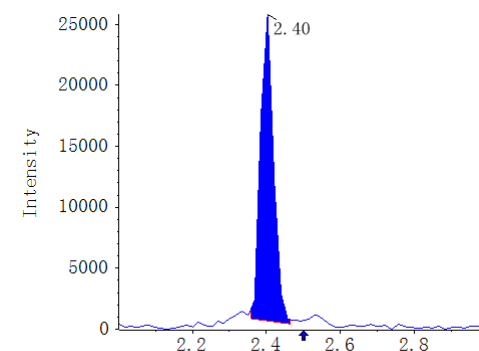

#### A21233251b\_b

(-)-Gallocatechin gallate AREA:3.02e4  
S/N:44.1

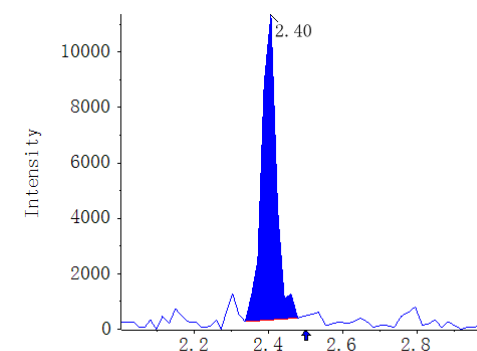

#### A21233252b\_b

(-)-Gallocatechin gallate AREA:1.04e4  
S/N:17.7

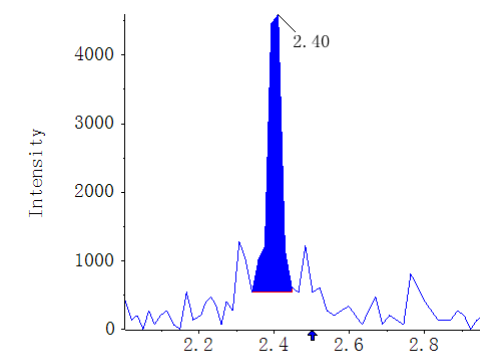

#### A21233253b\_b

(-)-Gallocatechin gallate AREA:3.76e4  
S/N:45.1

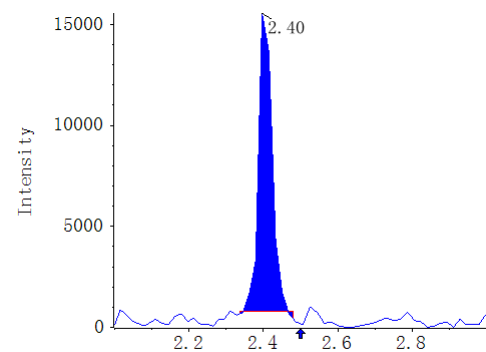

#### A21233254b\_b

(-)-Gallocatechin gallate AREA:2.98e4  
S/N:40.3

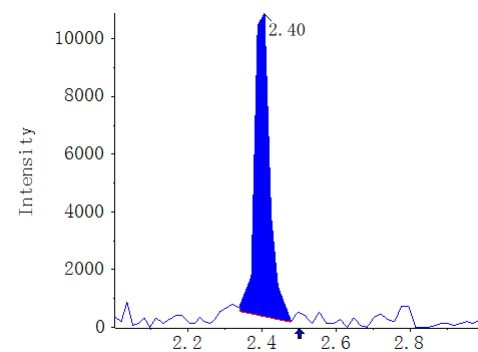

#### A21233255b\_b

(-)-Gallocatechin gallate AREA:7.50e3  
S/N:8.1

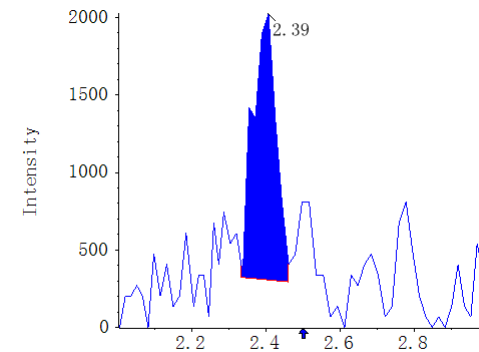

#### A21233256b\_b

(-)-Gallocatechin gallate AREA:9.88e4  
S/N:73.4

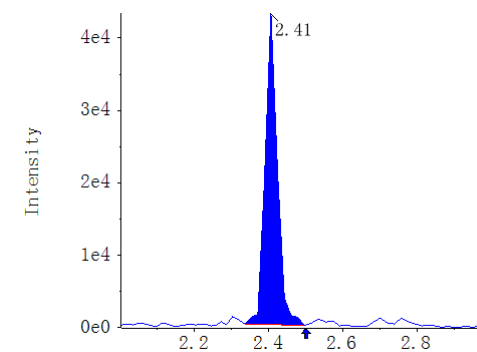

#### A21233257b\_b

(-)-Gallocatechin gallate AREA:1.53e4  
S/N:20.0

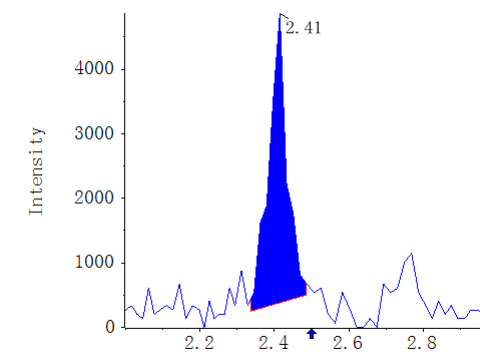

**A21233258b\_b**  
(-)-Gallocatechin gallate  
AREA:2.26e4 S/N:22.8

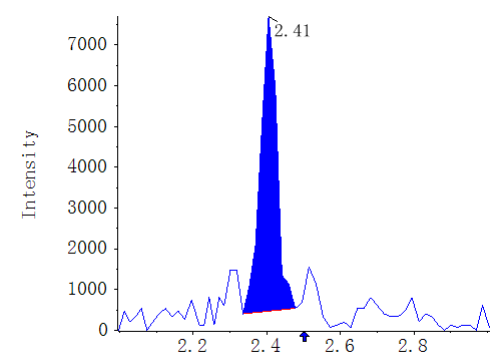

**A21233259b\_b**  
(-)-Gallocatechin gallate  
AREA:1.30e5 S/N:110.7

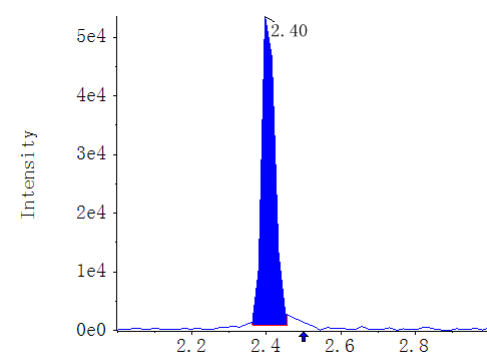

**A21233260b\_b**  
(-)-Gallocatechin gallate  
AREA:4.76e5 S/N:205.2

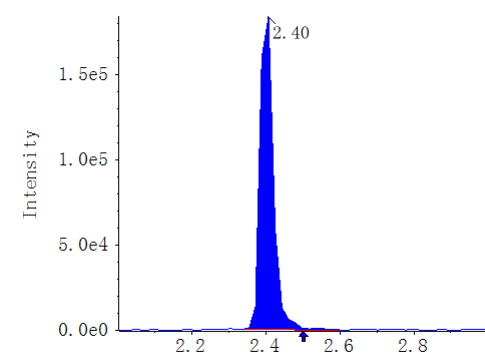

**A21233261b\_b**  
(-)-Gallocatechin gallate  
AREA:1.27e6 S/N:278.9

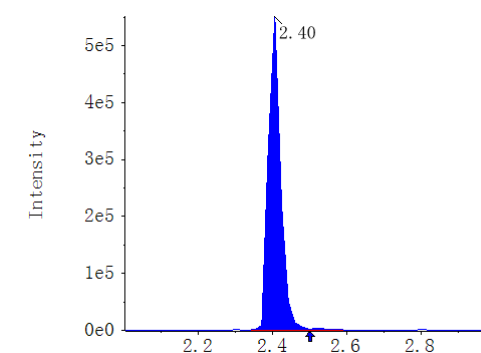

**A21233262b\_b**  
(-)-Gallocatechin gallate  
AREA:5.19e3 S/N:11.9

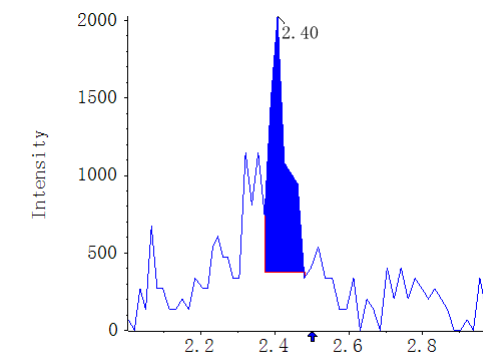

**A21233263b\_b**  
(-)-Gallocatechin gallate  
AREA:4.33e4 S/N:55.5

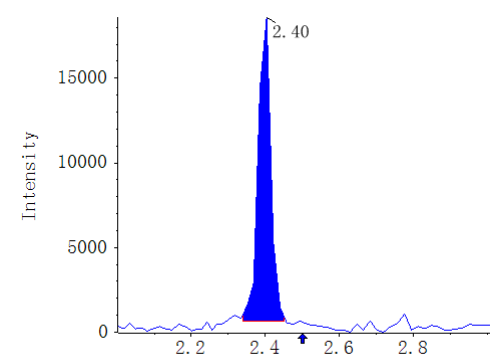

**A21233264b\_b**  
(-)-Gallocatechin gallate  
AREA:1.44e5 S/N:84.7

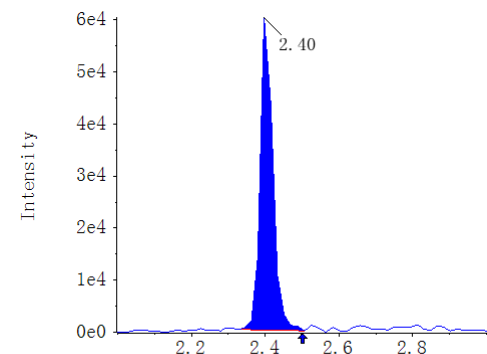

**A21233265b\_b**  
(-)-Gallocatechin gallate  
AREA:1.69e4 S/N:24.3

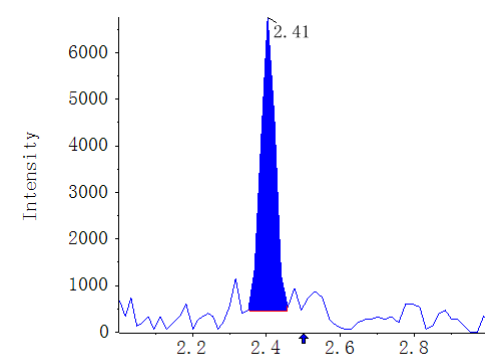

**A21233266b\_b**  
(-)-Gallocatechin gallate  
AREA:3.11e4 S/N:39.1

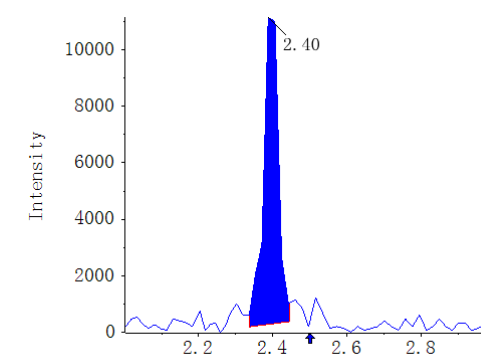

**A21233267b\_b**  
(-)-Gallocatechin gallate  
AREA:1.98e4 S/N:26.2

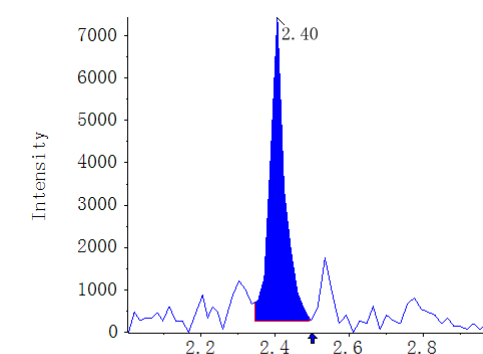

|                    |                                                    |                 |                      |
|--------------------|----------------------------------------------------|-----------------|----------------------|
| Result Table       | MWXS-21-2101D-3_18_WH6500-5_A20-3_V1.0_TY_20211028 | Algorithm Used  | MQ4                  |
| Acquisition Method | Flavonoids_V1.0_WH6500-5_LT_20211025.dam           | Instrument Name | QTRAP 6500+ Low Mass |
| Project            | N/A                                                | Analytes QTY    | 204:72               |

**Compound name: Cynaroside (447.1 / 285.0)**

| Sample Name           | Sample Type     | Area (cps) | Is Area (cps) | RT (min) | S/N  | Target Conc | Calculated Conc.() |
|-----------------------|-----------------|------------|---------------|----------|------|-------------|--------------------|
| STD_0.5nM             | Standard        | 5.42e3     | N/A           | 2.78     | 15.4 | 0.5000      | 3.679276e-1        |
| STD_1nM               | Standard        | 9.51e3     | N/A           | 2.76     | 31.1 | 1.0000      | 8.137083e-1        |
| STD_5nM               | Standard        | 6.75e4     | N/A           | 2.77     | 40.5 | 5.0000      | 7.143554e0         |
| STD_10nM              | Standard        | 9.83e4     | N/A           | 2.77     | 40.6 | 10.0000     | 1.049888e1         |
| STD_20nM              | Standard        | 1.81e5     | N/A           | 2.77     | 55.9 | 20.0000     | 1.952823e1         |
| STD_50nM              | Standard        | 4.59e5     | N/A           | 2.78     | 50.8 | 50.0000     | 4.991449e1         |
| STD_100nM             | Standard        | 9.29e5     | N/A           | 2.78     | 41.4 | 100.0000    | 1.011942e2         |
| STD_200nM             | Standard        | 1.81e6     | N/A           | 2.77     | 57.7 | 200.0000    | 1.970390e2         |
| STD_500nM             | Standard        | N/A        | N/A           | N/A      | N/A  | 500.0000    | N/A                |
| STD_1000nM            | Standard        | N/A        | N/A           | N/A      | N/A  | 1000.0000   | N/A                |
| STD_2000nM            | Standard        | N/A        | N/A           | N/A      | N/A  | 2000.0000   | N/A                |
| V1.0_MW_RQC1_20211018 | Quality Control | 9.96e7     | N/A           | 2.76     | 52.7 | 0.0000      | 1.087153e4         |
| Blank                 | Unknown         | N/A        | N/A           | N/A      | N/A  | N/A         | N/A                |
| V1.0_MWMS_20211021_1  | Unknown         | 1.51e6     | N/A           | 2.78     | 58.0 | N/A         | 1.647122e2         |
| MWXS212101D3_R1       | Quality Control | 1.53e6     | N/A           | 2.77     | 55.0 | 0.0000      | 1.668221e2         |
| MWXS212101D3_R2       | Quality Control | 1.54e6     | N/A           | 2.78     | 63.6 | 0.0000      | 1.676668e2         |
| MWXS212101D3_R3       | Quality Control | 1.54e6     | N/A           | 2.78     | 60.9 | 0.0000      | 1.678479e2         |
| A21233250b_b          | Unknown         | 1.26e5     | N/A           | 2.76     | 10.7 | N/A         | 1.352708e1         |
| A21233251b_b          | Unknown         | N/A        | N/A           | N/A      | N/A  | N/A         | N/A                |
| A21233252b_b          | Unknown         | N/A        | N/A           | N/A      | N/A  | N/A         | N/A                |
| A21233253b_b          | Unknown         | N/A        | N/A           | N/A      | N/A  | N/A         | N/A                |
| A21233254b_b          | Unknown         | N/A        | N/A           | N/A      | N/A  | N/A         | N/A                |
| A21233255b_b          | Unknown         | N/A        | N/A           | N/A      | N/A  | N/A         | N/A                |
| A21233256b_b          | Unknown         | N/A        | N/A           | N/A      | N/A  | N/A         | N/A                |
| A21233257b_b          | Unknown         | N/A        | N/A           | N/A      | N/A  | N/A         | N/A                |
| A21233258b_b          | Unknown         | N/A        | N/A           | N/A      | N/A  | N/A         | N/A                |
| A21233259b_b          | Unknown         | 1.52e5     | N/A           | 2.75     | 16.8 | N/A         | 1.631934e1         |
| A21233260b_b          | Unknown         | 1.10e5     | N/A           | 2.76     | 9.6  | N/A         | 1.173353e1         |
| A21233261b_b          | Unknown         | 1.42e5     | N/A           | 2.76     | 13.7 | N/A         | 1.528784e1         |
| A21233262b_b          | Unknown         | 7.32e4     | N/A           | 2.75     | 8.9  | N/A         | 7.759179e0         |
| A21233263b_b          | Unknown         | 7.49e4     | N/A           | 2.75     | 4.2  | N/A         | 7.951200e0         |
| A21233264b_b          | Unknown         | N/A        | N/A           | N/A      | N/A  | N/A         | N/A                |
| A21233265b_b          | Unknown         | N/A        | N/A           | N/A      | N/A  | N/A         | N/A                |
| A21233266b_b          | Unknown         | N/A        | N/A           | N/A      | N/A  | N/A         | N/A                |
| A21233267b_b          | Unknown         | N/A        | N/A           | N/A      | N/A  | N/A         | N/A                |

Compound name: Cynaroside  
Regression Equation:  $y = 9163.75687x + 2049.74881$  ( $r = 0.99853$ ) (weighting:  $1/x$ )

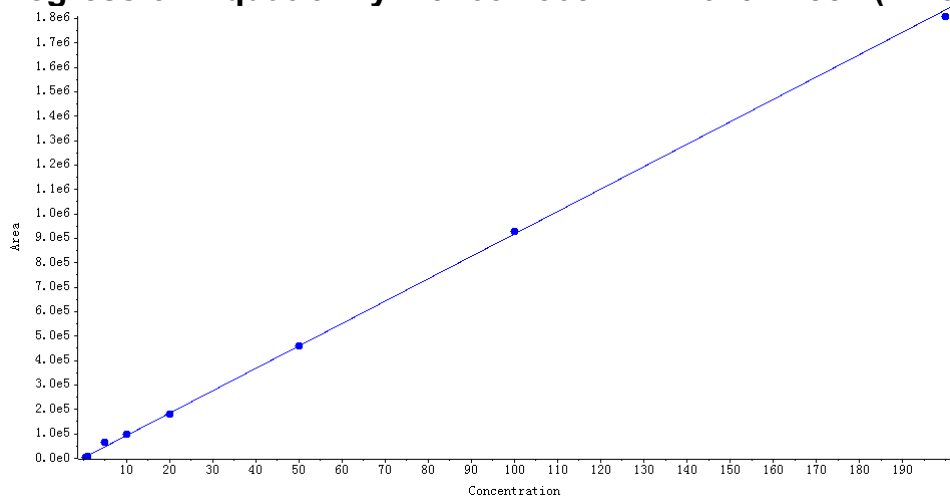

Peak Review

Blank

Cynaroside AREA:N/A S/N:N/A

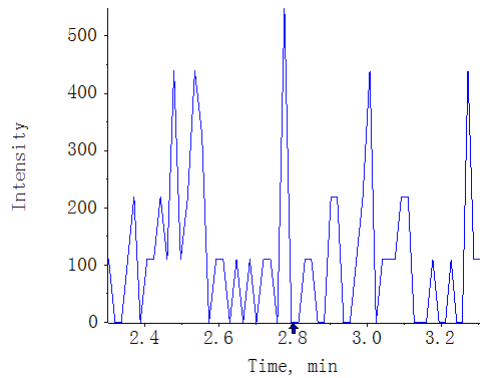

V1.0\_MWMS\_20211021\_1

Cynaroside AREA:1.51e6  
S/N:58.0

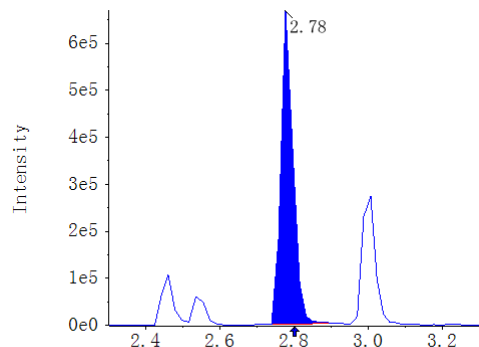

A21233250b\_b

Cynaroside AREA:1.26e5  
S/N:10.7

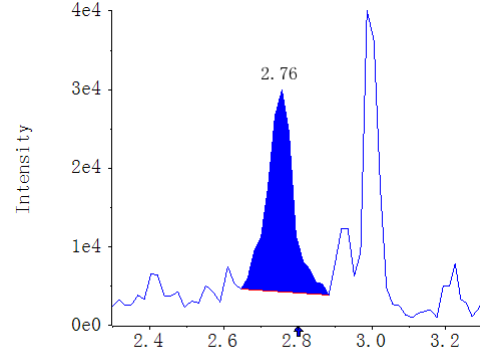

A21233251b\_b

Cynaroside AREA:N/A S/N:N/A

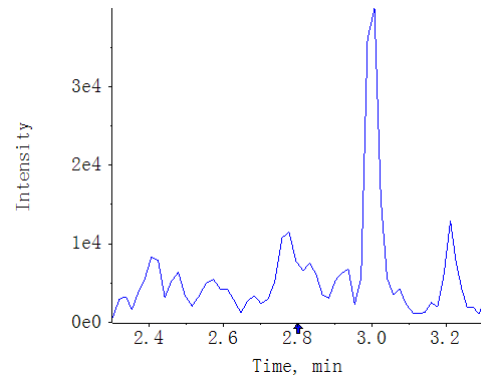

A21233252b\_b

Cynaroside AREA:N/A S/N:N/A

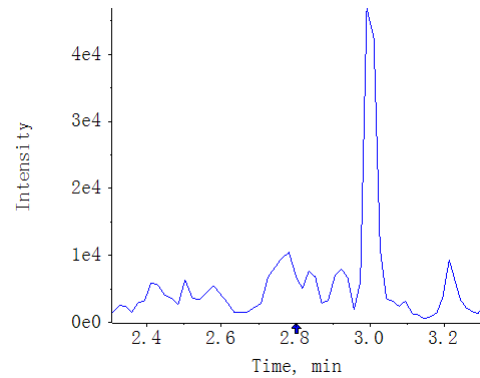

A21233253b\_b

Cynaroside AREA:N/A S/N:N/A

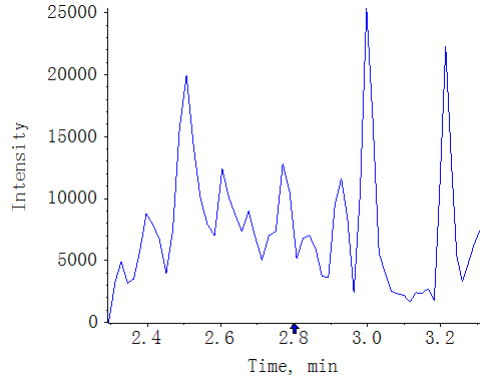

A21233254b\_b

Cynaroside AREA:N/A S/N:N/A

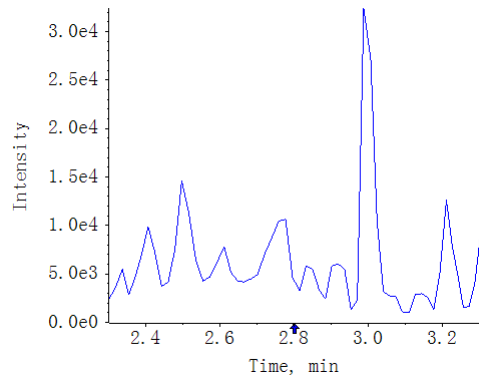

A21233255b\_b

Cynaroside AREA:N/A S/N:N/A

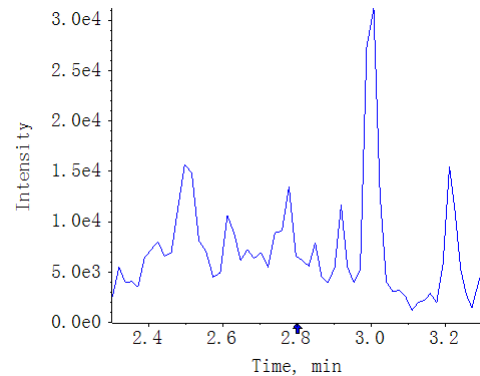

A21233256b\_b

Cynaroside AREA:N/A S/N:N/A

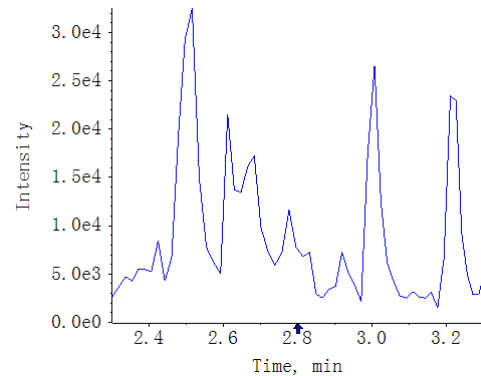

A21233257b\_b

Cynaroside AREA:N/A S/N:N/A

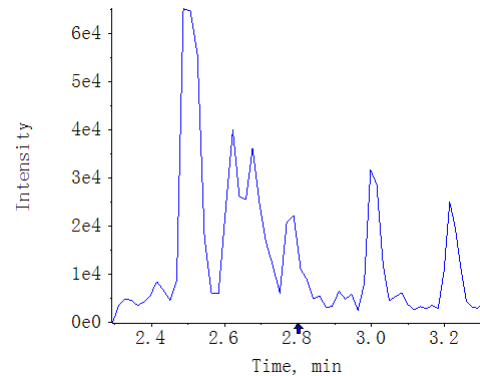

**A21233258b\_b**

Cynaroside AREA:N/A S/N:N/A

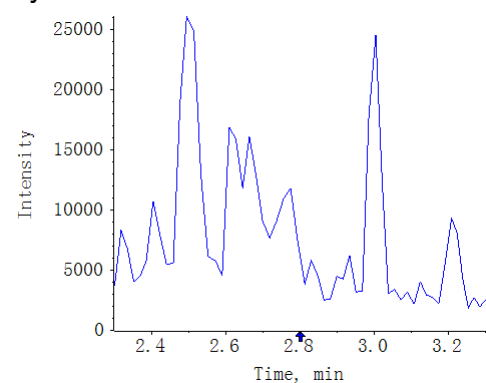

**A21233259b\_b**

Cynaroside AREA:1.52e5 S/N:16.8

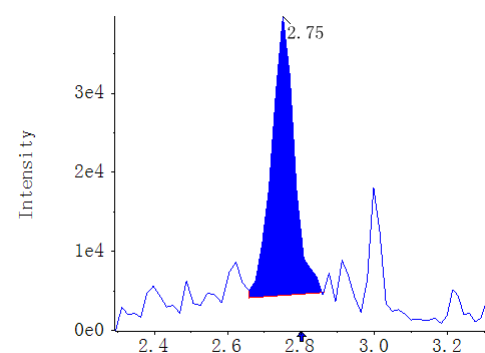

**A21233260b\_b**

Cynaroside AREA:1.10e5 S/N:9.6

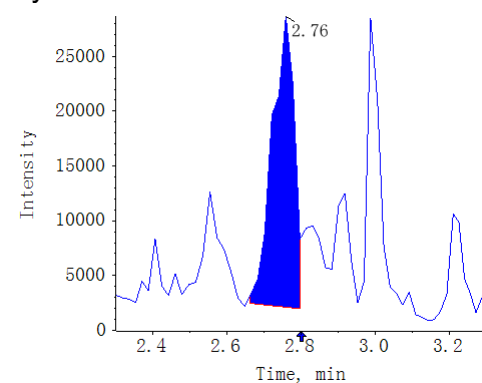

**A21233261b\_b**

Cynaroside AREA:1.42e5 S/N:13.7

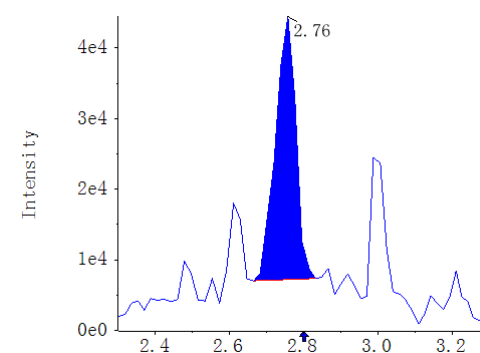

**A21233262b\_b**

Cynaroside AREA:7.32e4 S/N:8.9

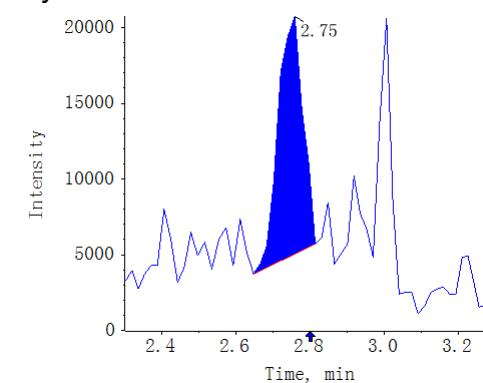

**A21233263b\_b**

Cynaroside AREA:7.49e4 S/N:4.2

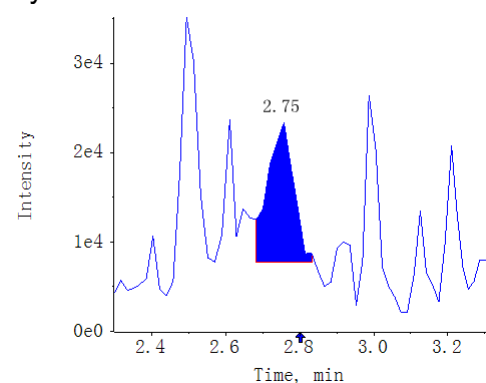

**A21233264b\_b**

Cynaroside AREA:N/A S/N:N/A

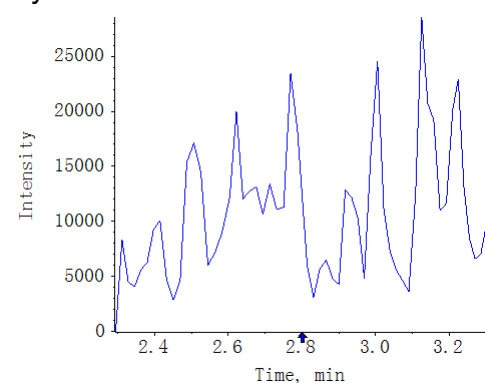

**A21233265b\_b**

Cynaroside AREA:N/A S/N:N/A

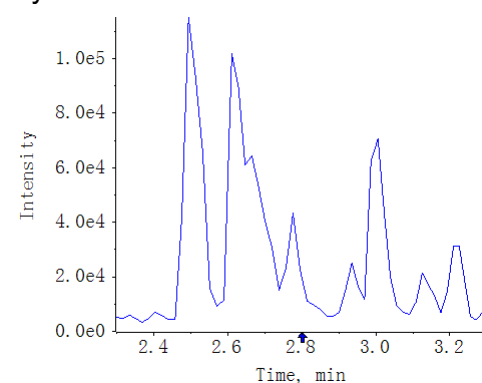

**A21233266b\_b**

Cynaroside AREA:N/A S/N:N/A

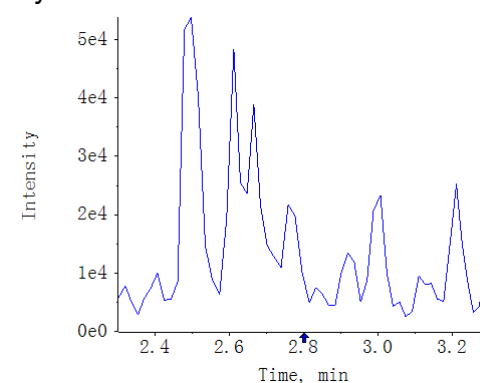

**A21233267b\_b**

Cynaroside AREA:N/A S/N:N/A

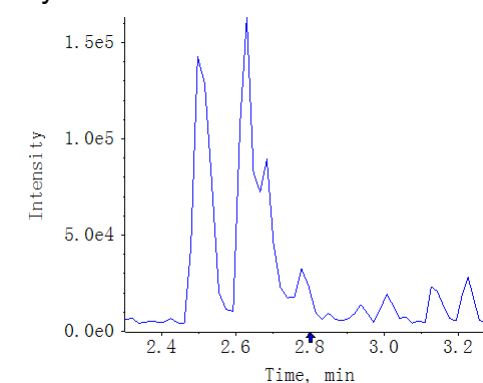

|                    |                                                    |                 |                      |
|--------------------|----------------------------------------------------|-----------------|----------------------|
| Result Table       | MWXS-21-2101D-3_18_WH6500-5_A20-3_V1.0_TY_20211028 | Algorithm Used  | MQ4                  |
| Acquisition Method | Flavonoids_V1.0_WH6500-5_LT_20211025.dam           | Instrument Name | QTRAP 6500+ Low Mass |
| Project            | N/A                                                | Analytes QTY    | 204:77               |

**Compound name: Calycosin-7-O- $\beta$ -D-glucoside (491.1 / 283.1)**

| Sample Name           | Sample Type     | Area (cps) | Is Area (cps) | RT (min) | S/N   | Target Conc | Calculated Conc.() |
|-----------------------|-----------------|------------|---------------|----------|-------|-------------|--------------------|
| STD_0.5nM             | Standard        | 1.97e3     | N/A           | 2.73     | 7.6   | 0.5000      | 3.033290e-1        |
| STD_1nM               | Standard        | 4.18e3     | N/A           | 2.71     | 12.7  | 1.0000      | 8.117155e-1        |
| STD_5nM               | Standard        | 3.28e4     | N/A           | 2.71     | 34.3  | 5.0000      | 7.402803e0         |
| STD_10nM              | Standard        | 4.23e4     | N/A           | 2.72     | 75.3  | 10.0000     | 9.596905e0         |
| STD_20nM              | Standard        | 9.55e4     | N/A           | 2.71     | 120.3 | 20.0000     | 2.187440e1         |
| STD_50nM              | Standard        | 2.47e5     | N/A           | 2.72     | 116.0 | 50.0000     | 5.681336e1         |
| STD_100nM             | Standard        | 4.02e5     | N/A           | 2.72     | 155.7 | 100.0000    | 9.258016e1         |
| STD_200nM             | Standard        | 8.56e5     | N/A           | 2.71     | 164.3 | 200.0000    | 1.971173e2         |
| STD_500nM             | Standard        | N/A        | N/A           | N/A      | N/A   | 500.0000    | N/A                |
| STD_1000nM            | Standard        | N/A        | N/A           | N/A      | N/A   | 1000.0000   | N/A                |
| STD_2000nM            | Standard        | N/A        | N/A           | N/A      | N/A   | 2000.0000   | N/A                |
| V1.0_MW_RQC1_20211018 | Quality Control | 7.02e3     | N/A           | 2.77     | 4.0   | 0.0000      | 1.467161e0         |
| Blank                 | Unknown         | N/A        | N/A           | N/A      | N/A   | N/A         | N/A                |
| V1.0_MWMS_20211021_1  | Unknown         | 6.75e5     | N/A           | 2.72     | 127.2 | N/A         | 1.555360e2         |
| MWXS212101D3_R1       | Quality Control | 6.46e5     | N/A           | 2.72     | 180.5 | 0.0000      | 1.487279e2         |
| MWXS212101D3_R2       | Quality Control | 6.94e5     | N/A           | 2.72     | 145.8 | 0.0000      | 1.599095e2         |
| MWXS212101D3_R3       | Quality Control | 6.42e5     | N/A           | 2.72     | 155.9 | 0.0000      | 1.479109e2         |
| A21233250b_b          | Unknown         | N/A        | N/A           | N/A      | N/A   | N/A         | N/A                |
| A21233251b_b          | Unknown         | N/A        | N/A           | N/A      | N/A   | N/A         | N/A                |
| A21233252b_b          | Unknown         | N/A        | N/A           | N/A      | N/A   | N/A         | N/A                |
| A21233253b_b          | Unknown         | 5.03e3     | N/A           | 2.73     | 4.5   | N/A         | 1.008405e0         |
| A21233254b_b          | Unknown         | N/A        | N/A           | N/A      | N/A   | N/A         | N/A                |
| A21233255b_b          | Unknown         | 6.02e3     | N/A           | 2.73     | 4.9   | N/A         | 1.236133e0         |
| A21233256b_b          | Unknown         | N/A        | N/A           | N/A      | N/A   | N/A         | N/A                |
| A21233257b_b          | Unknown         | N/A        | N/A           | N/A      | N/A   | N/A         | N/A                |
| A21233258b_b          | Unknown         | N/A        | N/A           | N/A      | N/A   | N/A         | N/A                |
| A21233259b_b          | Unknown         | 1.39e4     | N/A           | 2.73     | 11.0  | N/A         | 3.046213e0         |
| A21233260b_b          | Unknown         | 8.00e3     | N/A           | 2.72     | 8.7   | N/A         | 1.693446e0         |
| A21233261b_b          | Unknown         | 5.51e3     | N/A           | 2.72     | 2.8   | N/A         | 1.118137e0         |
| A21233262b_b          | Unknown         | 1.33e4     | N/A           | 2.73     | 5.4   | N/A         | 2.923231e0         |
| A21233263b_b          | Unknown         | 1.40e4     | N/A           | 2.72     | 6.5   | N/A         | 3.066686e0         |
| A21233264b_b          | Unknown         | N/A        | N/A           | N/A      | N/A   | N/A         | N/A                |
| A21233265b_b          | Unknown         | 1.29e4     | N/A           | 2.73     | 2.7   | N/A         | 2.820635e0         |
| A21233266b_b          | Unknown         | 1.20e4     | N/A           | 2.73     | 4.2   | N/A         | 2.616339e0         |
| A21233267b_b          | Unknown         | 1.26e4     | N/A           | 2.75     | 3.0   | N/A         | 2.744846e0         |

Compound name: Calycosin-7-O-β-D-glucoside  
Regression Equation:  $y = 4337.23759x + 657.66151$  ( $r = 0.99597$ ) (weighting:  $1/x$ )

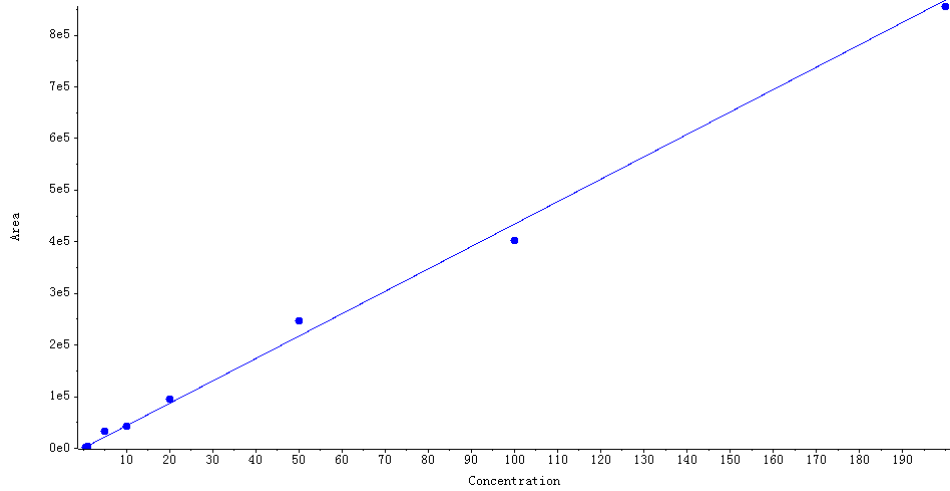

Peak Review

Blank  
Calycosin-7-O- β -D-glucoside  
AREA:N/A S/N:N/A

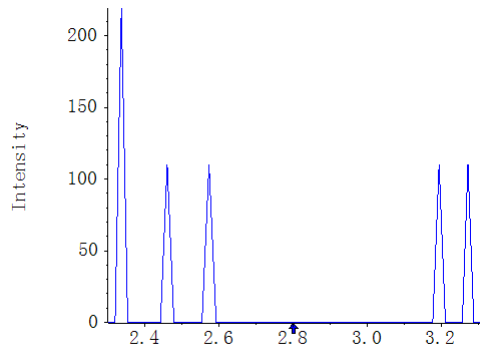

V1.0\_MWMS\_20211021\_1  
Calycosin-7-O- β -D-glucoside  
AREA:6.75e5 S/N:127.2

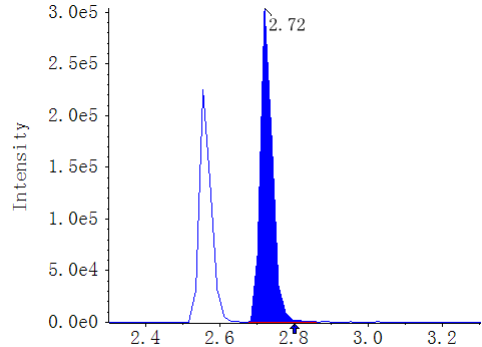

A21233250b\_b  
Calycosin-7-O- β -D-glucoside  
AREA:N/A S/N:N/A

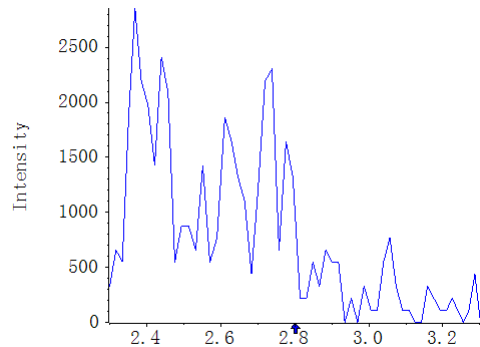

A21233251b\_b  
Calycosin-7-O- β -D-glucoside  
AREA:N/A S/N:N/A

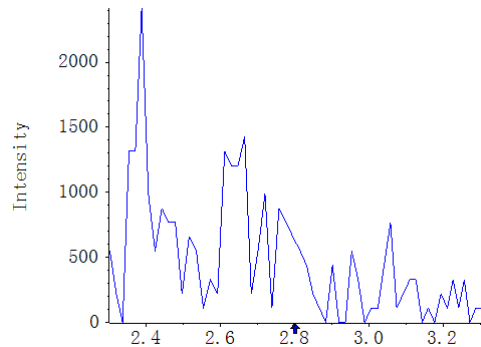

A21233252b\_b  
Calycosin-7-O- β -D-glucoside  
AREA:N/A S/N:N/A

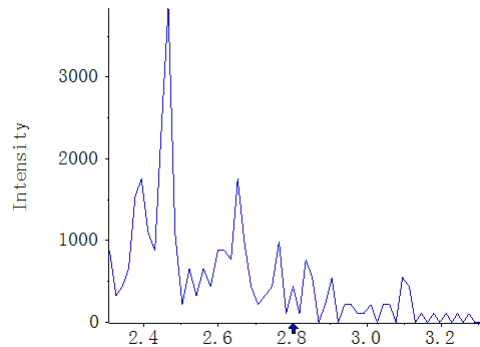

A21233253b\_b  
Calycosin-7-O- β -D-glucoside  
AREA:5.03e3 S/N:4.5

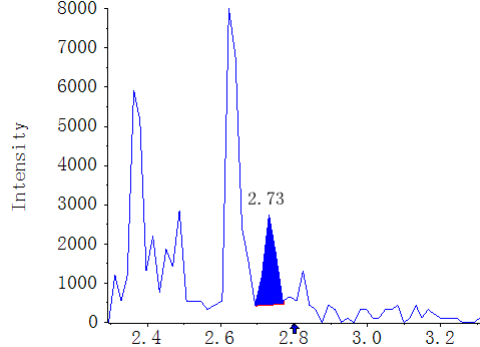

A21233254b\_b  
Calycosin-7-O- β -D-glucoside  
AREA:N/A S/N:N/A

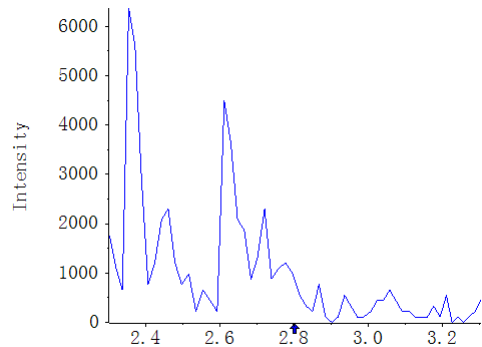

A21233255b\_b  
Calycosin-7-O- β -D-glucoside  
AREA:6.02e3 S/N:4.9

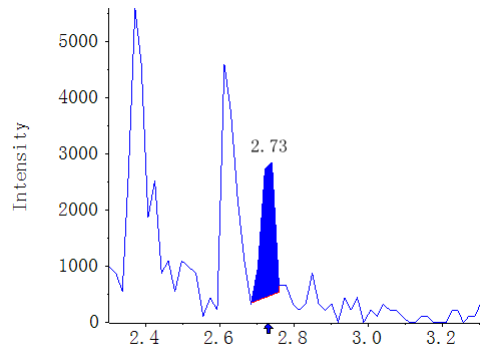

A21233256b\_b  
Calycosin-7-O- β -D-glucoside  
AREA:N/A S/N:N/A

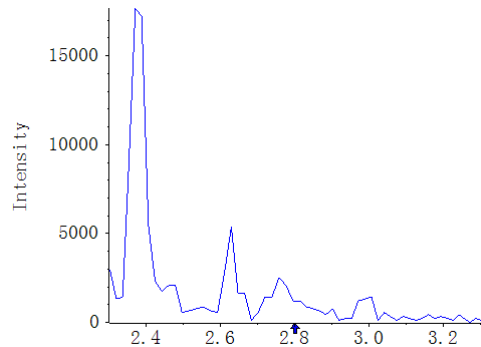

A21233257b\_b  
Calycosin-7-O- β -D-glucoside  
AREA:N/A S/N:N/A

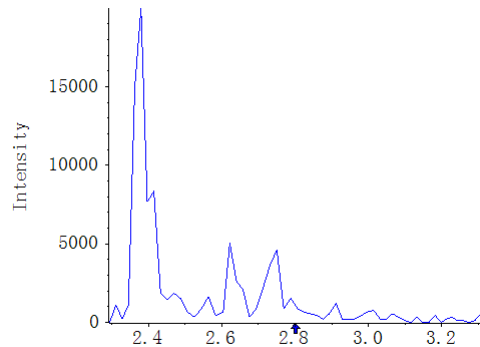

**A21233258b\_b**  
Calycosin-7-O-  $\beta$  -D-glucoside  
AREA:N/A S/N:N/A

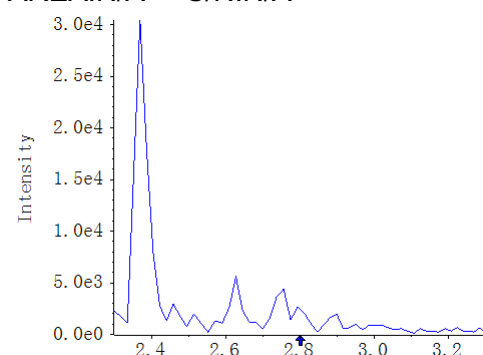

**A21233259b\_b**  
Calycosin-7-O-  $\beta$  -D-glucoside  
AREA:1.39e4 S/N:11.0

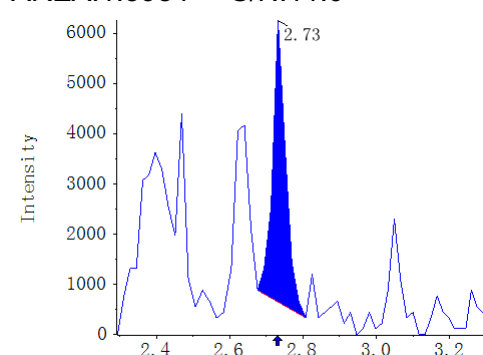

**A21233260b\_b**  
Calycosin-7-O-  $\beta$  -D-glucoside  
AREA:8.00e3 S/N:8.7

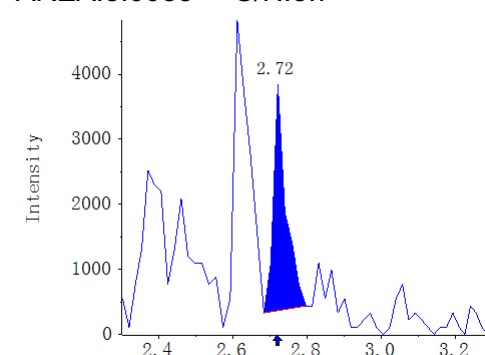

**A21233261b\_b**  
Calycosin-7-O-  $\beta$  -D-glucoside  
AREA:5.51e3 S/N:2.8

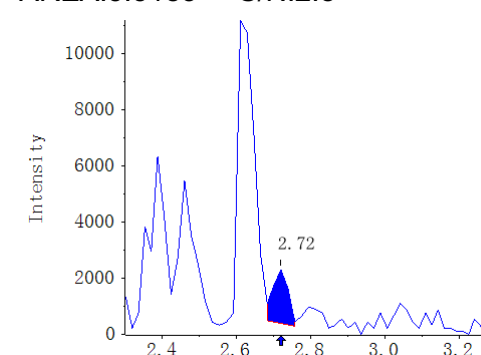

**A21233262b\_b**  
Calycosin-7-O-  $\beta$  -D-glucoside  
AREA:1.33e4 S/N:5.4

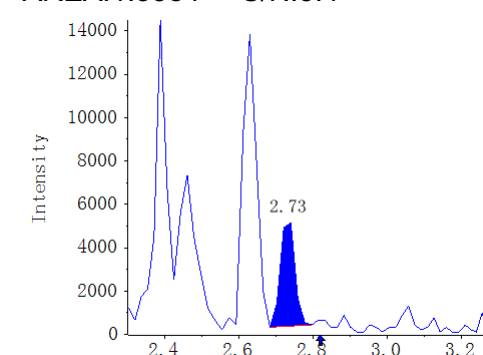

**A21233263b\_b**  
Calycosin-7-O-  $\beta$  -D-glucoside  
AREA:1.40e4 S/N:6.5

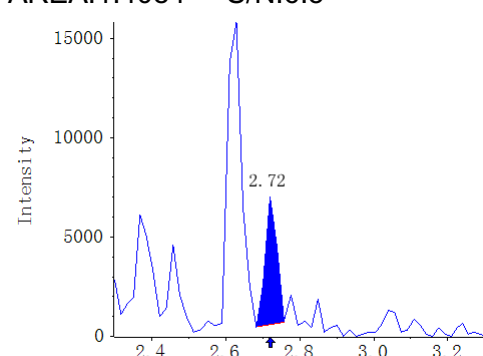

**A21233264b\_b**  
Calycosin-7-O-  $\beta$  -D-glucoside  
AREA:N/A S/N:N/A

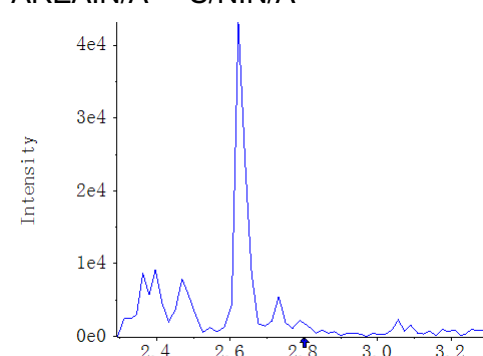

**A21233265b\_b**  
Calycosin-7-O-  $\beta$  -D-glucoside  
AREA:1.29e4 S/N:2.7

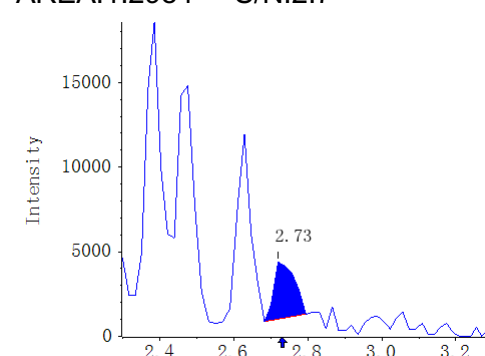

**A21233266b\_b**  
Calycosin-7-O-  $\beta$  -D-glucoside  
AREA:1.20e4 S/N:4.2

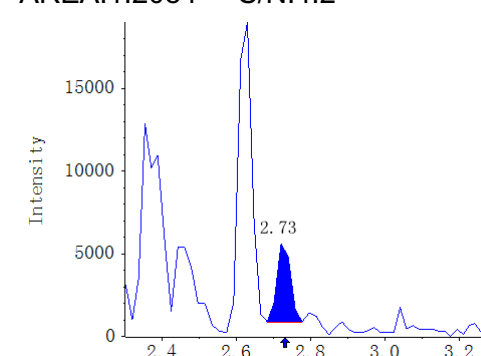

**A21233267b\_b**  
Calycosin-7-O-  $\beta$  -D-glucoside  
AREA:1.26e4 S/N:3.0

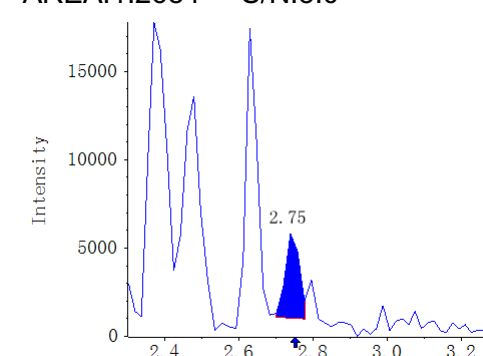

|                    |                                                    |                 |                      |
|--------------------|----------------------------------------------------|-----------------|----------------------|
| Result Table       | MWXS-21-2101D-3_18_WH6500-5_A20-3_V1.0_TY_20211028 | Algorithm Used  | MQ4                  |
| Acquisition Method | Flavonoids_V1.0_WH6500-5_LT_20211025.dam           | Instrument Name | QTRAP 6500+ Low Mass |
| Project            | N/A                                                | Analytes QTY    | 204:84               |

**Compound name: Typhaneoside (769.2 / 314.0)**

| Sample Name           | Sample Type     | Area (cps) | Is Area (cps) | RT (min) | S/N   | Target Conc | Calculated Conc.() |
|-----------------------|-----------------|------------|---------------|----------|-------|-------------|--------------------|
| STD_0.5nM             | Standard        | 1.27e3     | N/A           | 2.52     | 19.3  | 0.5000      | 3.953665e-1        |
| STD_1nM               | Standard        | 2.34e3     | N/A           | 2.52     | 31.2  | 1.0000      | 8.135263e-1        |
| STD_5nM               | Standard        | 1.84e4     | N/A           | 2.52     | 45.2  | 5.0000      | 7.098839e0         |
| STD_10nM              | Standard        | 2.66e4     | N/A           | 2.52     | 39.0  | 10.0000     | 1.030599e1         |
| STD_20nM              | Standard        | 4.88e4     | N/A           | 2.52     | 35.0  | 20.0000     | 1.897026e1         |
| STD_50nM              | Standard        | 1.27e5     | N/A           | 2.52     | 153.7 | 50.0000     | 4.937076e1         |
| STD_100nM             | Standard        | 2.62e5     | N/A           | 2.53     | 287.6 | 100.0000    | 1.023440e2         |
| STD_200nM             | Standard        | 5.05e5     | N/A           | 2.52     | 471.6 | 200.0000    | 1.972013e2         |
| STD_500nM             | Standard        | N/A        | N/A           | N/A      | N/A   | 500.0000    | N/A                |
| STD_1000nM            | Standard        | N/A        | N/A           | N/A      | N/A   | 1000.0000   | N/A                |
| STD_2000nM            | Standard        | N/A        | N/A           | N/A      | N/A   | 2000.0000   | N/A                |
| V1.0_MW_RQC1_20211018 | Quality Control | N/A        | N/A           | N/A      | N/A   | 0.0000      | N/A                |
| Blank                 | Unknown         | N/A        | N/A           | N/A      | N/A   | N/A         | N/A                |
| V1.0_MWMS_20211021_1  | Unknown         | 4.58e5     | N/A           | 2.53     | 513.2 | N/A         | 1.785616e2         |
| MWXS212101D3_R1       | Quality Control | 4.77e5     | N/A           | 2.53     | 276.9 | 0.0000      | 1.860908e2         |
| MWXS212101D3_R2       | Quality Control | 4.44e5     | N/A           | 2.53     | 416.2 | 0.0000      | 1.732765e2         |
| MWXS212101D3_R3       | Quality Control | 4.75e5     | N/A           | 2.53     | 337.2 | 0.0000      | 1.854157e2         |
| A21233250b_b          | Unknown         | N/A        | N/A           | N/A      | N/A   | N/A         | N/A                |
| A21233251b_b          | Unknown         | 3.91e3     | N/A           | 2.50     | 27.2  | N/A         | 1.428591e0         |
| A21233252b_b          | Unknown         | 1.45e3     | N/A           | 2.50     | 9.0   | N/A         | 4.657044e-1        |
| A21233253b_b          | Unknown         | 1.36e4     | N/A           | 2.50     | 33.8  | N/A         | 5.219735e0         |
| A21233254b_b          | Unknown         | 7.29e3     | N/A           | 2.51     | 25.7  | N/A         | 2.744944e0         |
| A21233255b_b          | Unknown         | 1.68e4     | N/A           | 2.51     | 27.8  | N/A         | 6.443453e0         |
| A21233256b_b          | Unknown         | 5.41e3     | N/A           | 2.50     | 19.5  | N/A         | 2.013626e0         |
| A21233257b_b          | Unknown         | N/A        | N/A           | N/A      | N/A   | N/A         | N/A                |
| A21233258b_b          | Unknown         | 7.67e3     | N/A           | 2.51     | 23.1  | N/A         | 2.894047e0         |
| A21233259b_b          | Unknown         | N/A        | N/A           | N/A      | N/A   | N/A         | N/A                |
| A21233260b_b          | Unknown         | 7.11e3     | N/A           | 2.50     | 26.2  | N/A         | 2.677355e0         |
| A21233261b_b          | Unknown         | N/A        | N/A           | N/A      | N/A   | N/A         | N/A                |
| A21233262b_b          | Unknown         | N/A        | N/A           | N/A      | N/A   | N/A         | N/A                |
| A21233263b_b          | Unknown         | 1.61e4     | N/A           | 2.50     | 23.0  | N/A         | 6.191469e0         |
| A21233264b_b          | Unknown         | N/A        | N/A           | N/A      | N/A   | N/A         | N/A                |
| A21233265b_b          | Unknown         | 3.11e3     | N/A           | 2.51     | 8.4   | N/A         | 1.115762e0         |
| A21233266b_b          | Unknown         | 2.56e3     | N/A           | 2.49     | 7.2   | N/A         | 8.978757e-1        |
| A21233267b_b          | Unknown         | 1.10e4     | N/A           | 2.50     | 22.5  | N/A         | 4.208072e0         |

Compound name: Typhaneoside

Regression Equation:  $y = 2560.71134x + 256.37551$  ( $r = 0.99850$ ) (weighting:  $1/x$ )

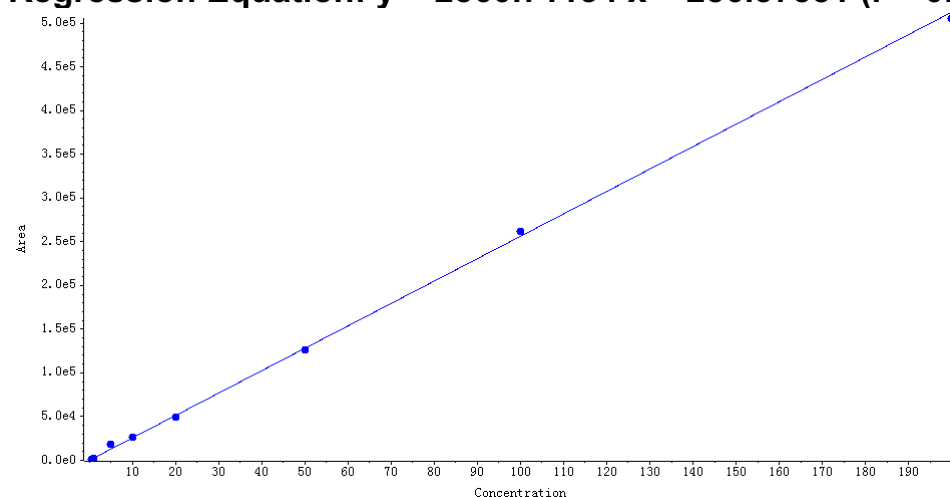

### Peak Review

Blank

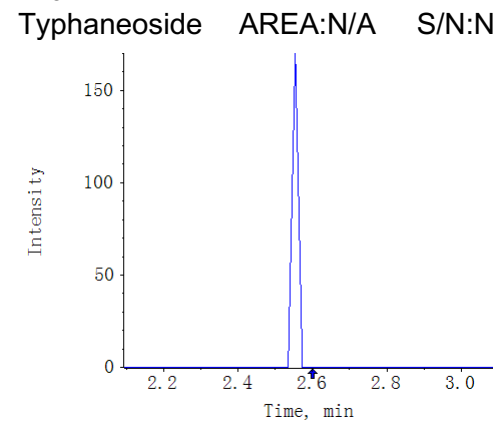

V1.0\_MWMS\_20211021\_1  
Typhaneoside AREA:4.58e5  
S/N:513.2

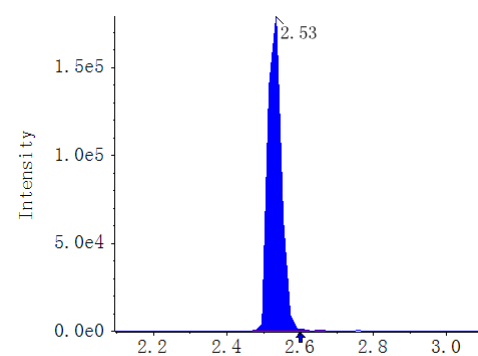

A21233250b\_b

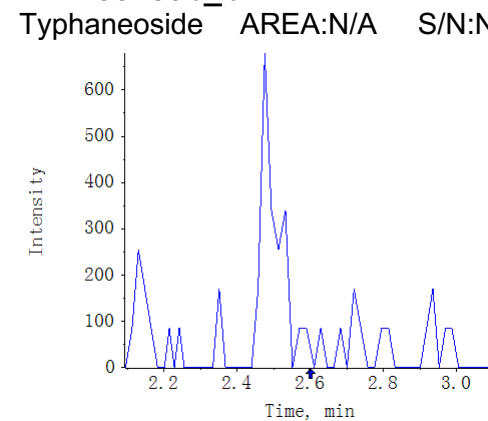

A21233251b\_b

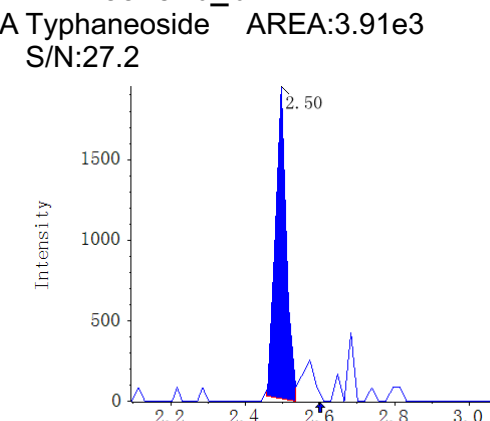

A21233252b\_b

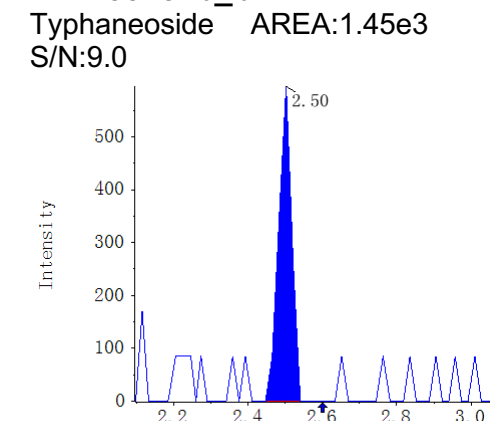

A21233253b\_b

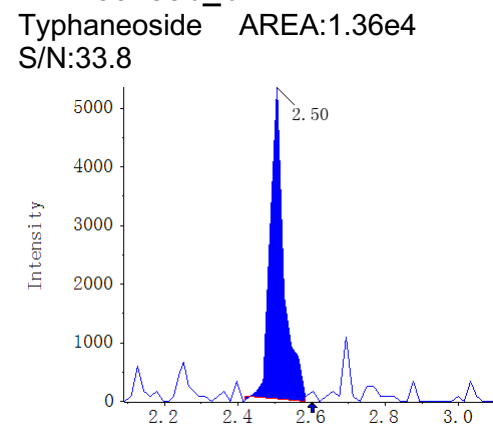

A21233254b\_b

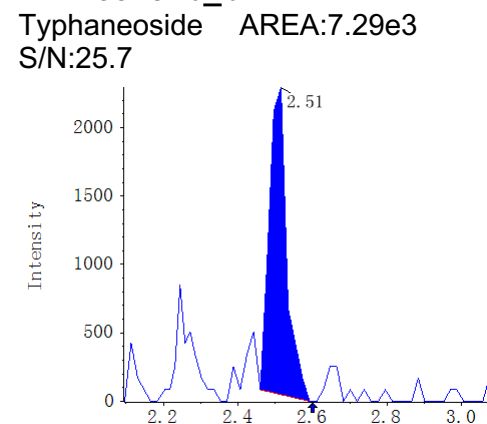

A21233255b\_b

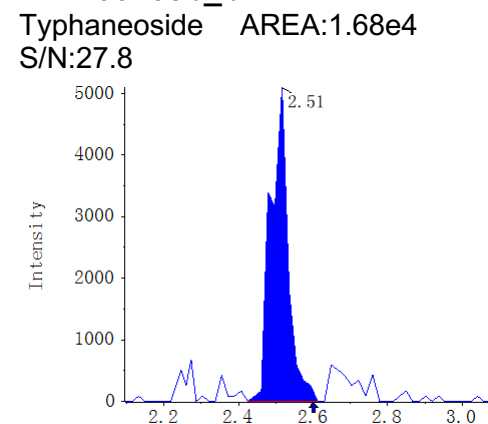

A21233256b\_b

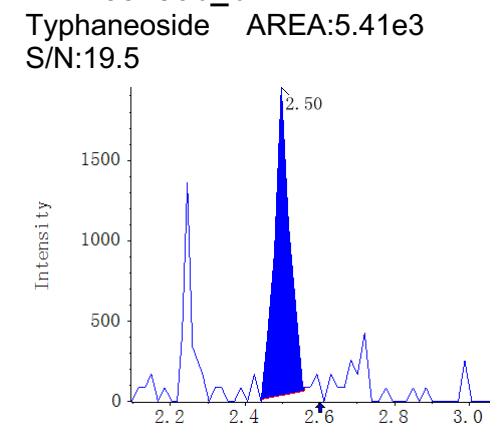

A21233257b\_b

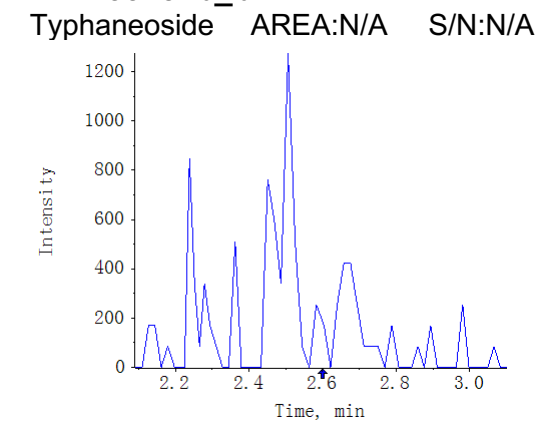

**A21233258b\_b**

Typhaneoside AREA:7.67e3  
S/N:23.1

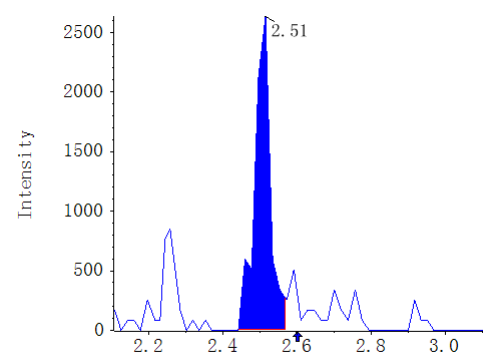

**A21233259b\_b**

Typhaneoside AREA:N/A S/N:N/A

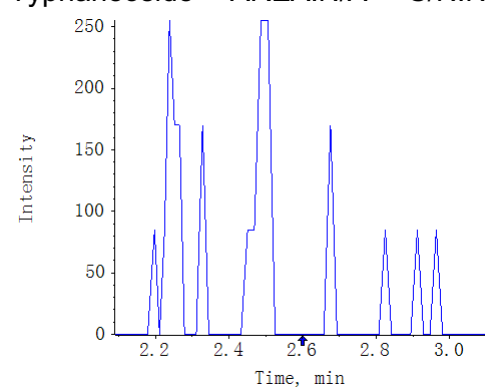

**A21233260b\_b**

Typhaneoside AREA:7.11e3  
S/N:26.2

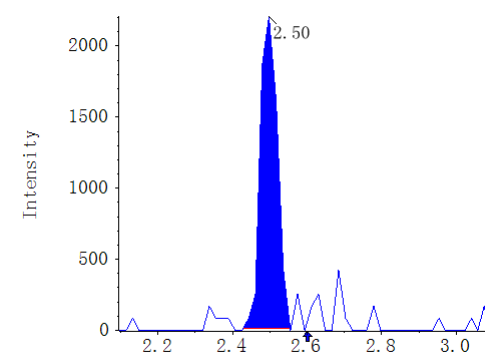

**A21233261b\_b**

Typhaneoside AREA:N/A S/N:N/A

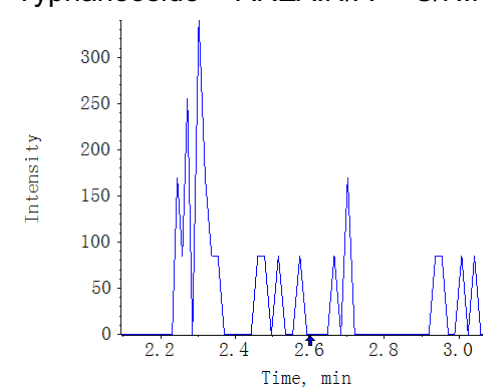

**A21233262b\_b**

Typhaneoside AREA:N/A S/N:N/A

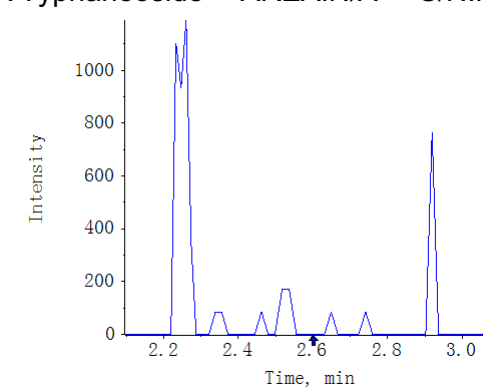

**A21233263b\_b**

Typhaneoside AREA:1.61e4  
S/N:23.0

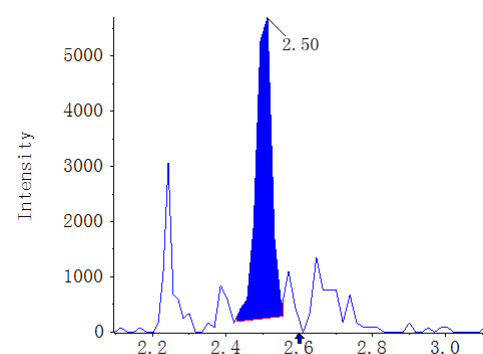

**A21233264b\_b**

Typhaneoside AREA:N/A S/N:N/A

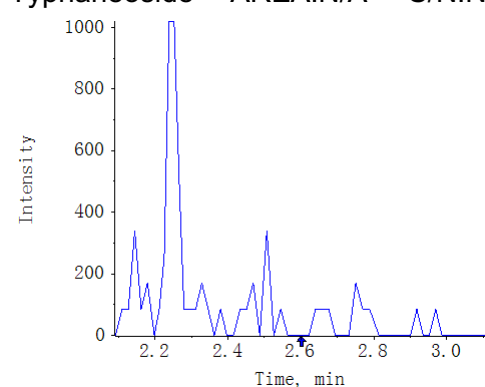

**A21233265b\_b**

Typhaneoside AREA:3.11e3  
S/N:8.4

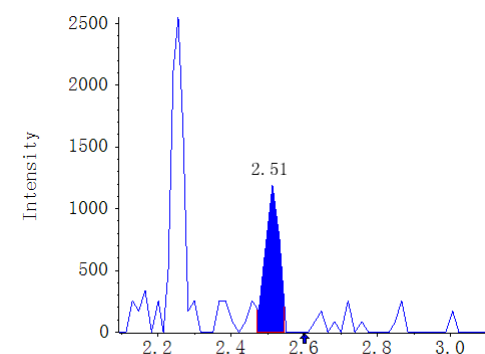

**A21233266b\_b**

Typhaneoside AREA:2.56e3  
S/N:7.2

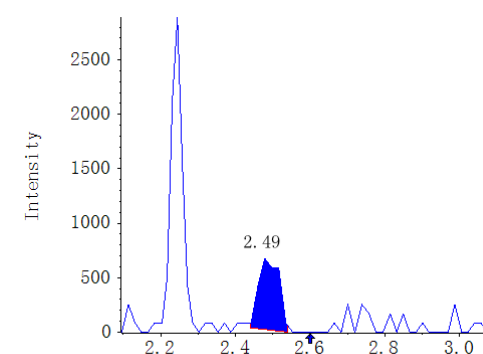

**A21233267b\_b**

Typhaneoside AREA:1.10e4  
S/N:22.5

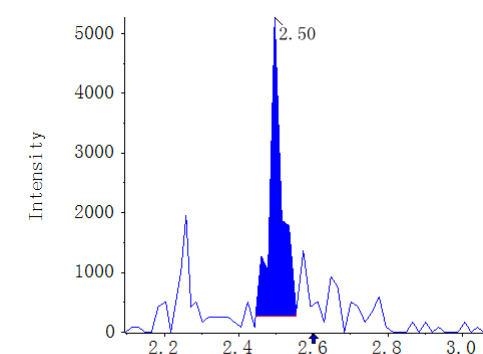

|                    |                                                    |                 |                      |
|--------------------|----------------------------------------------------|-----------------|----------------------|
| Result Table       | MWXS-21-2101D-3_18_WH6500-5_A20-3_V1.0_TY_20211028 | Algorithm Used  | MQ4                  |
| Acquisition Method | Flavonoids_V1.0_WH6500-5_LT_20211025.dam           | Instrument Name | QTRAP 6500+ Low Mass |
| Project            | N/A                                                | Analytes QTY    | 204:91               |

**Compound name: Quercitrin (447.1 / 300.0)**

| Sample Name           | Sample Type     | Area (cps) | Is Area (cps) | RT (min) | S/N   | Target Conc | Calculated Conc.() |
|-----------------------|-----------------|------------|---------------|----------|-------|-------------|--------------------|
| STD_0.5nM             | Standard        | 2.76e3     | N/A           | 3.04     | 23.1  | 0.5000      | 3.035567e-1        |
| STD_1nM               | Standard        | 7.40e3     | N/A           | 3.03     | 33.8  | 1.0000      | 1.117109e0         |
| STD_5nM               | Standard        | 3.64e4     | N/A           | 3.03     | 95.9  | 5.0000      | 6.199276e0         |
| STD_10nM              | Standard        | 6.26e4     | N/A           | 3.03     | 128.1 | 10.0000     | 1.079422e1         |
| STD_20nM              | Standard        | 1.09e5     | N/A           | 3.03     | 192.8 | 20.0000     | 1.898660e1         |
| STD_50nM              | Standard        | 2.95e5     | N/A           | 3.03     | 146.1 | 50.0000     | 5.151102e1         |
| STD_100nM             | Standard        | 5.59e5     | N/A           | 3.04     | 180.5 | 100.0000    | 9.780161e1         |
| STD_200nM             | Standard        | 1.14e6     | N/A           | 3.03     | 202.7 | 200.0000    | 1.997866e2         |
| STD_500nM             | Standard        | N/A        | N/A           | N/A      | N/A   | 500.0000    | N/A                |
| STD_1000nM            | Standard        | N/A        | N/A           | N/A      | N/A   | 1000.0000   | N/A                |
| STD_2000nM            | Standard        | N/A        | N/A           | N/A      | N/A   | 2000.0000   | N/A                |
| V1.0_MW_RQC1_20211018 | Quality Control | N/A        | N/A           | N/A      | N/A   | 0.0000      | N/A                |
| Blank                 | Unknown         | N/A        | N/A           | N/A      | N/A   | N/A         | N/A                |
| V1.0_MWMS_20211021_1  | Unknown         | 1.00e6     | N/A           | 3.05     | 238.9 | N/A         | 1.758412e2         |
| MWXS212101D3_R1       | Quality Control | 1.04e6     | N/A           | 3.04     | 229.0 | 0.0000      | 1.826871e2         |
| MWXS212101D3_R2       | Quality Control | 9.79e5     | N/A           | 3.05     | 210.5 | 0.0000      | 1.713469e2         |
| MWXS212101D3_R3       | Quality Control | 1.01e6     | N/A           | 3.05     | 205.6 | 0.0000      | 1.767022e2         |
| A21233250b_b          | Unknown         | 1.93e4     | N/A           | 3.04     | 67.9  | N/A         | 3.199920e0         |
| A21233251b_b          | Unknown         | 5.16e3     | N/A           | 3.05     | 15.0  | N/A         | 7.247634e-1        |
| A21233252b_b          | Unknown         | 1.39e3     | N/A           | 3.06     | 8.7   | N/A         | 6.286767e-2        |
| A21233253b_b          | Unknown         | 5.05e3     | N/A           | 3.04     | 20.3  | N/A         | 7.057488e-1        |
| A21233254b_b          | Unknown         | 2.13e3     | N/A           | 3.05     | 10.6  | N/A         | 1.931427e-1        |
| A21233255b_b          | Unknown         | N/A        | N/A           | N/A      | N/A   | N/A         | N/A                |
| A21233256b_b          | Unknown         | 3.18e3     | N/A           | 3.05     | 14.4  | N/A         | 3.773837e-1        |
| A21233257b_b          | Unknown         | 2.64e3     | N/A           | 3.05     | 16.6  | N/A         | 2.833795e-1        |
| A21233258b_b          | Unknown         | N/A        | N/A           | N/A      | N/A   | N/A         | N/A                |
| A21233259b_b          | Unknown         | 8.53e3     | N/A           | 3.05     | 23.5  | N/A         | 1.314393e0         |
| A21233260b_b          | Unknown         | 4.94e4     | N/A           | 3.04     | 94.4  | N/A         | 8.484925e0         |
| A21233261b_b          | Unknown         | 9.50e4     | N/A           | 3.05     | 115.5 | N/A         | 1.645880e1         |
| A21233262b_b          | Unknown         | N/A        | N/A           | N/A      | N/A   | N/A         | N/A                |
| A21233263b_b          | Unknown         | N/A        | N/A           | N/A      | N/A   | N/A         | N/A                |
| A21233264b_b          | Unknown         | 6.18e3     | N/A           | 3.04     | 14.6  | N/A         | 9.025556e-1        |
| A21233265b_b          | Unknown         | N/A        | N/A           | N/A      | N/A   | N/A         | N/A                |
| A21233266b_b          | Unknown         | N/A        | N/A           | N/A      | N/A   | N/A         | N/A                |
| A21233267b_b          | Unknown         | 9.66e3     | N/A           | 3.06     | 44.8  | N/A         | 1.512393e0         |

Compound name: Quercitrin  
Regression Equation:  $y = 5706.55627x + 1027.38360$  ( $r = 0.99920$ ) (weighting:  $1/x$ )

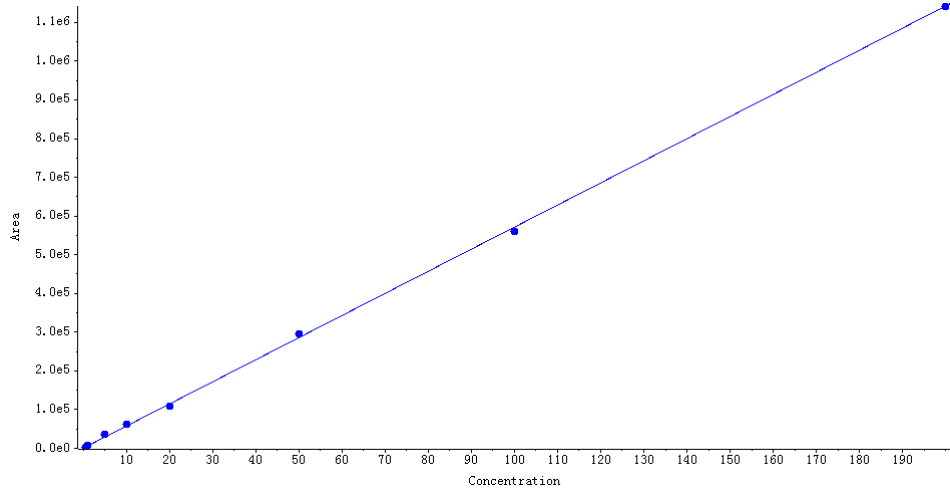

Peak Review

Blank

Quercitrin AREA:N/A S/N:N/A

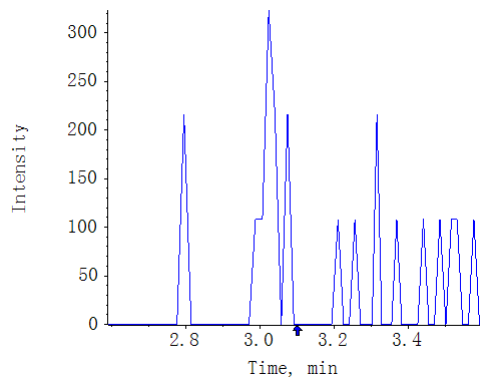

V1.0\_MWMS\_20211021\_1

Quercitrin AREA:1.00e6 S/N:238.9

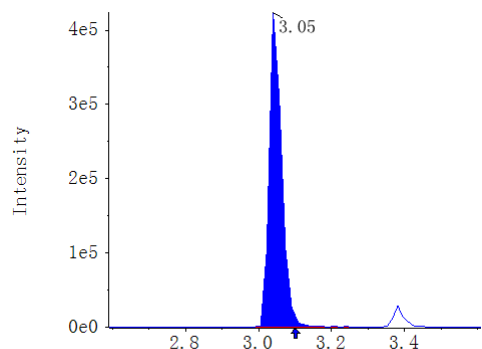

A21233250b\_b

Quercitrin AREA:1.93e4 S/N:67.9

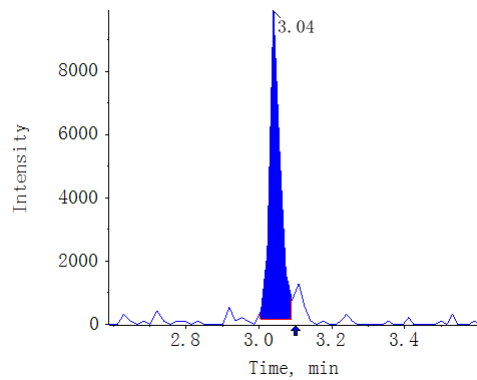

A21233251b\_b

Quercitrin AREA:5.16e3 S/N:15.0

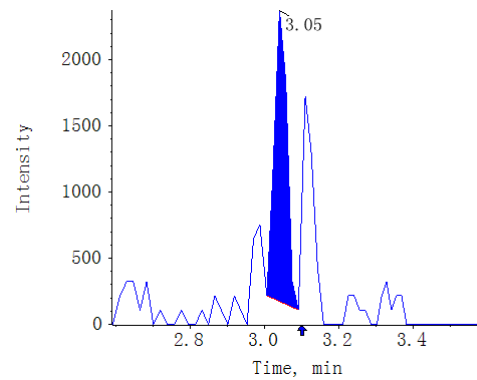

A21233252b\_b

Quercitrin AREA:1.39e3 S/N:8.7

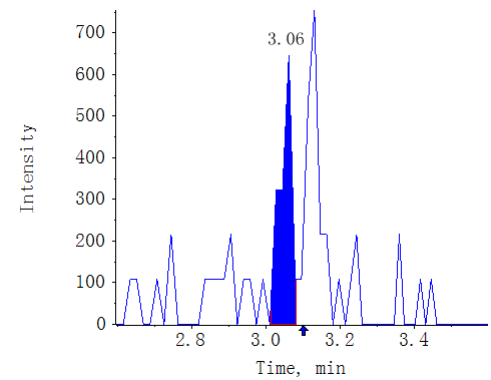

A21233253b\_b

Quercitrin AREA:5.05e3 S/N:20.3

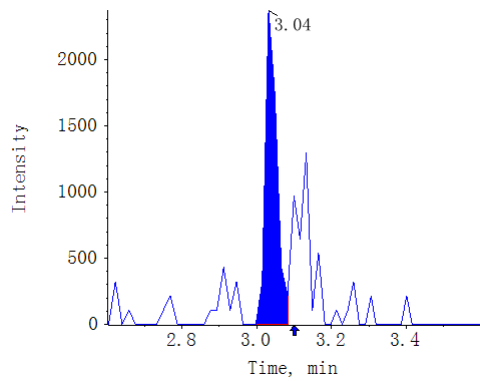

A21233254b\_b

Quercitrin AREA:2.13e3 S/N:10.6

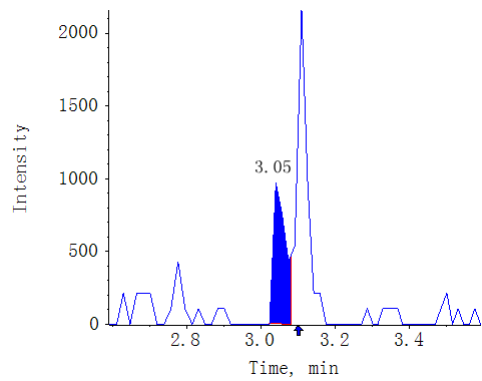

A21233255b\_b

Quercitrin AREA:N/A S/N:N/A

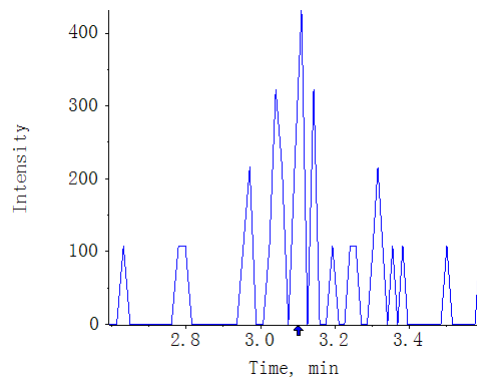

A21233256b\_b

Quercitrin AREA:3.18e3 S/N:14.4

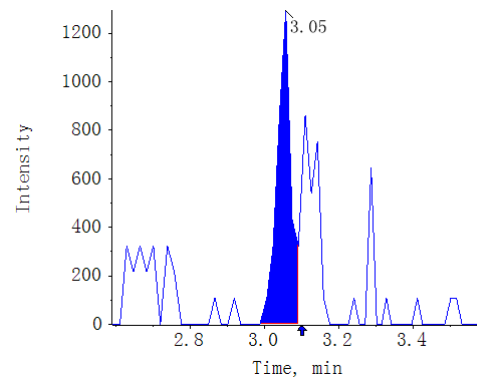

A21233257b\_b

Quercitrin AREA:2.64e3 S/N:16.6

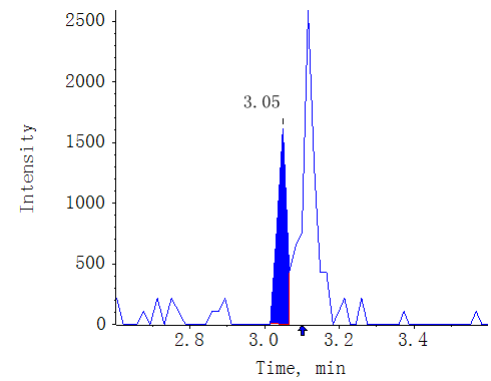

**A21233258b\_b**

Quercitrin AREA:N/A S/N:N/A

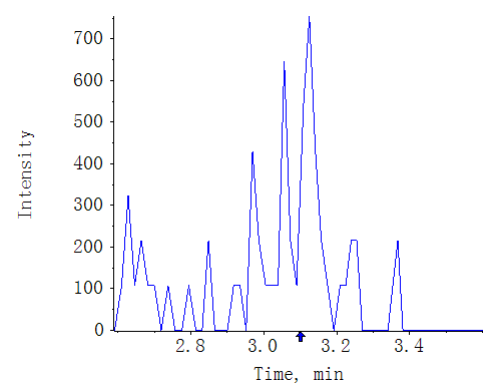

**A21233259b\_b**

Quercitrin AREA:8.53e3 S/N:23.5

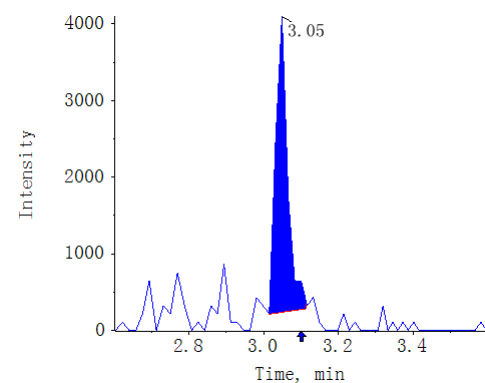

**A21233260b\_b**

Quercitrin AREA:4.94e4 S/N:94.4

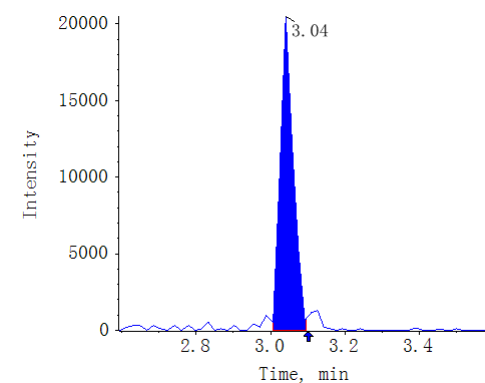

**A21233261b\_b**

Quercitrin AREA:9.50e4 S/N:115.5

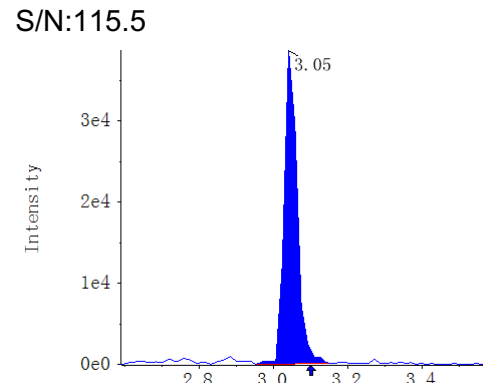

**A21233262b\_b**

Quercitrin AREA:N/A S/N:N/A

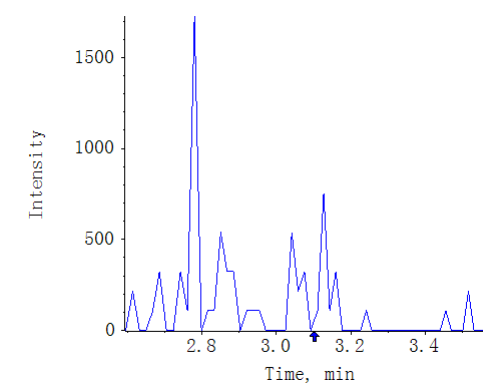

**A21233263b\_b**

Quercitrin AREA:N/A S/N:N/A

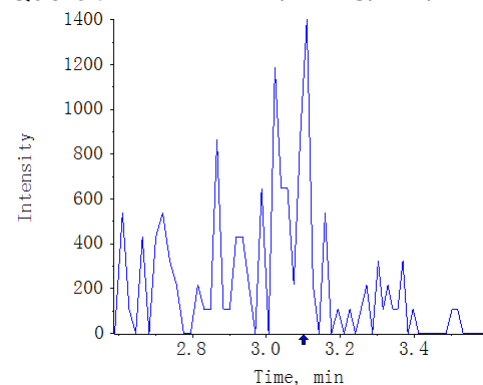

**A21233264b\_b**

Quercitrin AREA:6.18e3 S/N:14.6

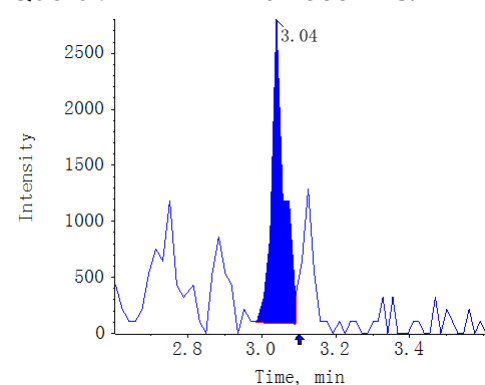

**A21233265b\_b**

Quercitrin AREA:N/A S/N:N/A

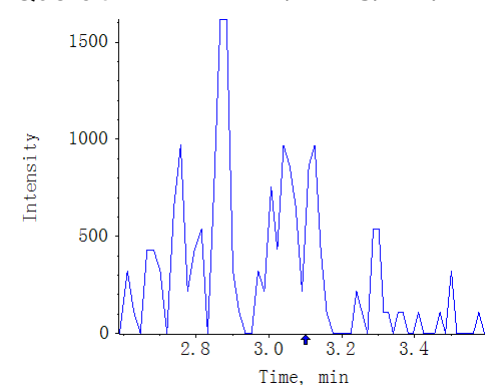

**A21233266b\_b**

Quercitrin AREA:N/A S/N:N/A

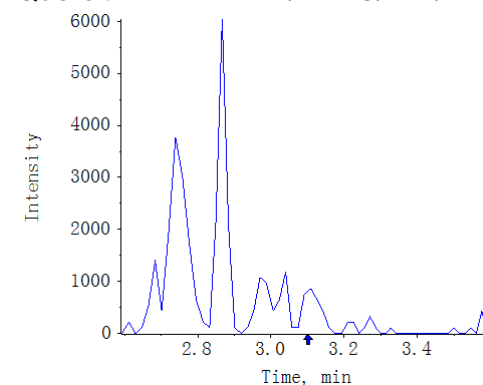

**A21233267b\_b**

Quercitrin AREA:9.66e3 S/N:44.8

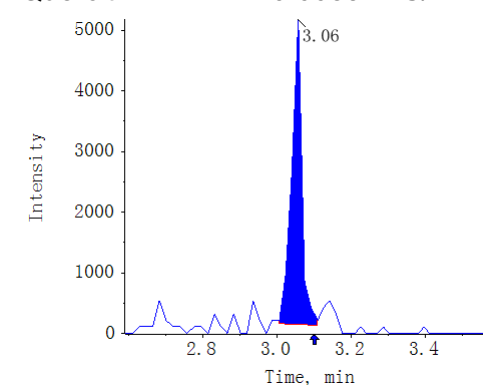

|                    |                                                    |                 |                      |
|--------------------|----------------------------------------------------|-----------------|----------------------|
| Result Table       | MWXS-21-2101D-3_18_WH6500-5_A20-3_V1.0_TY_20211028 | Algorithm Used  | MQ4                  |
| Acquisition Method | Flavonoids_V1.0_WH6500-5_LT_20211025.dam           | Instrument Name | QTRAP 6500+ Low Mass |
| Project            | N/A                                                | Analytes QTY    | 204:93               |

**Compound name: Engeletin (433.1 / 269.0)**

| Sample Name           | Sample Type     | Area (cps) | Is Area (cps) | RT (min) | S/N   | Target Conc | Calculated Conc.() |
|-----------------------|-----------------|------------|---------------|----------|-------|-------------|--------------------|
| STD_0.5nM             | Standard        | N/A        | N/A           | N/A      | N/A   | 0.5000      | N/A                |
| STD_1nM               | Standard        | N/A        | N/A           | N/A      | N/A   | 1.0000      | N/A                |
| STD_5nM               | Standard        | 2.30e4     | N/A           | 3.16     | 78.7  | 5.0000      | 6.057708e0         |
| STD_10nM              | Standard        | 3.08e4     | N/A           | 3.16     | 58.4  | 10.0000     | 8.909377e0         |
| STD_20nM              | Standard        | 5.55e4     | N/A           | 3.16     | 78.4  | 20.0000     | 1.789671e1         |
| STD_50nM              | Standard        | 1.42e5     | N/A           | 3.17     | 95.2  | 50.0000     | 4.944071e1         |
| STD_100nM             | Standard        | 2.82e5     | N/A           | 3.17     | 133.3 | 100.0000    | 1.000787e2         |
| STD_200nM             | Standard        | 5.64e5     | N/A           | 3.16     | 100.5 | 200.0000    | 2.026168e2         |
| STD_500nM             | Standard        | N/A        | N/A           | N/A      | N/A   | 500.0000    | N/A                |
| STD_1000nM            | Standard        | N/A        | N/A           | N/A      | N/A   | 1000.0000   | N/A                |
| STD_2000nM            | Standard        | N/A        | N/A           | N/A      | N/A   | 2000.0000   | N/A                |
| V1.0_MW_RQC1_20211018 | Quality Control | N/A        | N/A           | N/A      | N/A   | 0.0000      | N/A                |
| Blank                 | Unknown         | N/A        | N/A           | N/A      | N/A   | N/A         | N/A                |
| V1.0_MWMS_20211021_1  | Unknown         | 5.21e5     | N/A           | 3.18     | 121.9 | N/A         | 1.872336e2         |
| MWXS212101D3_R1       | Quality Control | 4.73e5     | N/A           | 3.17     | 131.6 | 0.0000      | 1.696093e2         |
| MWXS212101D3_R2       | Quality Control | 4.77e5     | N/A           | 3.18     | 110.3 | 0.0000      | 1.712170e2         |
| MWXS212101D3_R3       | Quality Control | 4.68e5     | N/A           | 3.18     | 106.0 | 0.0000      | 1.676677e2         |
| A21233250b_b          | Unknown         | N/A        | N/A           | N/A      | N/A   | N/A         | N/A                |
| A21233251b_b          | Unknown         | N/A        | N/A           | N/A      | N/A   | N/A         | N/A                |
| A21233252b_b          | Unknown         | N/A        | N/A           | N/A      | N/A   | N/A         | N/A                |
| A21233253b_b          | Unknown         | 1.07e4     | N/A           | 3.15     | 6.6   | N/A         | 1.609031e0         |
| A21233254b_b          | Unknown         | 8.89e3     | N/A           | 3.14     | 11.5  | N/A         | 9.419230e-1        |
| A21233255b_b          | Unknown         | 1.14e4     | N/A           | 3.15     | 11.5  | N/A         | 1.850715e0         |
| A21233256b_b          | Unknown         | 8.11e3     | N/A           | 3.15     | 8.2   | N/A         | 6.607587e-1        |
| A21233257b_b          | Unknown         | 1.02e4     | N/A           | 3.15     | 7.8   | N/A         | 1.433898e0         |
| A21233258b_b          | Unknown         | 6.44e3     | N/A           | 3.15     | 7.3   | N/A         | 5.171781e-2        |
| A21233259b_b          | Unknown         | N/A        | N/A           | N/A      | N/A   | N/A         | N/A                |
| A21233260b_b          | Unknown         | N/A        | N/A           | N/A      | N/A   | N/A         | N/A                |
| A21233261b_b          | Unknown         | N/A        | N/A           | N/A      | N/A   | N/A         | N/A                |
| A21233262b_b          | Unknown         | N/A        | N/A           | N/A      | N/A   | N/A         | N/A                |
| A21233263b_b          | Unknown         | 1.18e4     | N/A           | 3.15     | 5.5   | N/A         | 2.015040e0         |
| A21233264b_b          | Unknown         | N/A        | N/A           | N/A      | N/A   | N/A         | N/A                |
| A21233265b_b          | Unknown         | 1.05e4     | N/A           | 3.16     | 3.8   | N/A         | 1.536654e0         |
| A21233266b_b          | Unknown         | 7.96e3     | N/A           | 3.15     | 4.6   | N/A         | 6.035617e-1        |
| A21233267b_b          | Unknown         | N/A        | N/A           | N/A      | N/A   | N/A         | N/A                |

Compound name: Engeletin  
Regression Equation:  $y = 2750.71378x + 6296.33056$  ( $r = 0.99896$ ) (weighting:  $1/x$ )

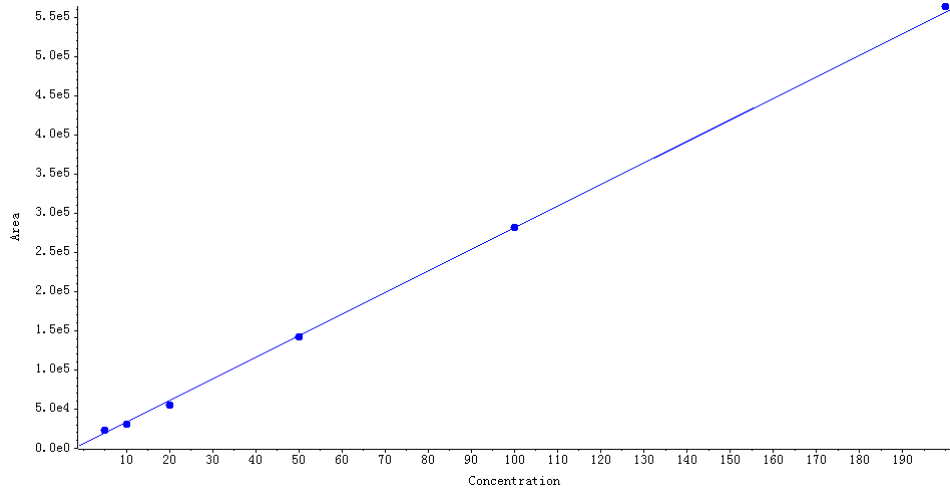

Peak Review

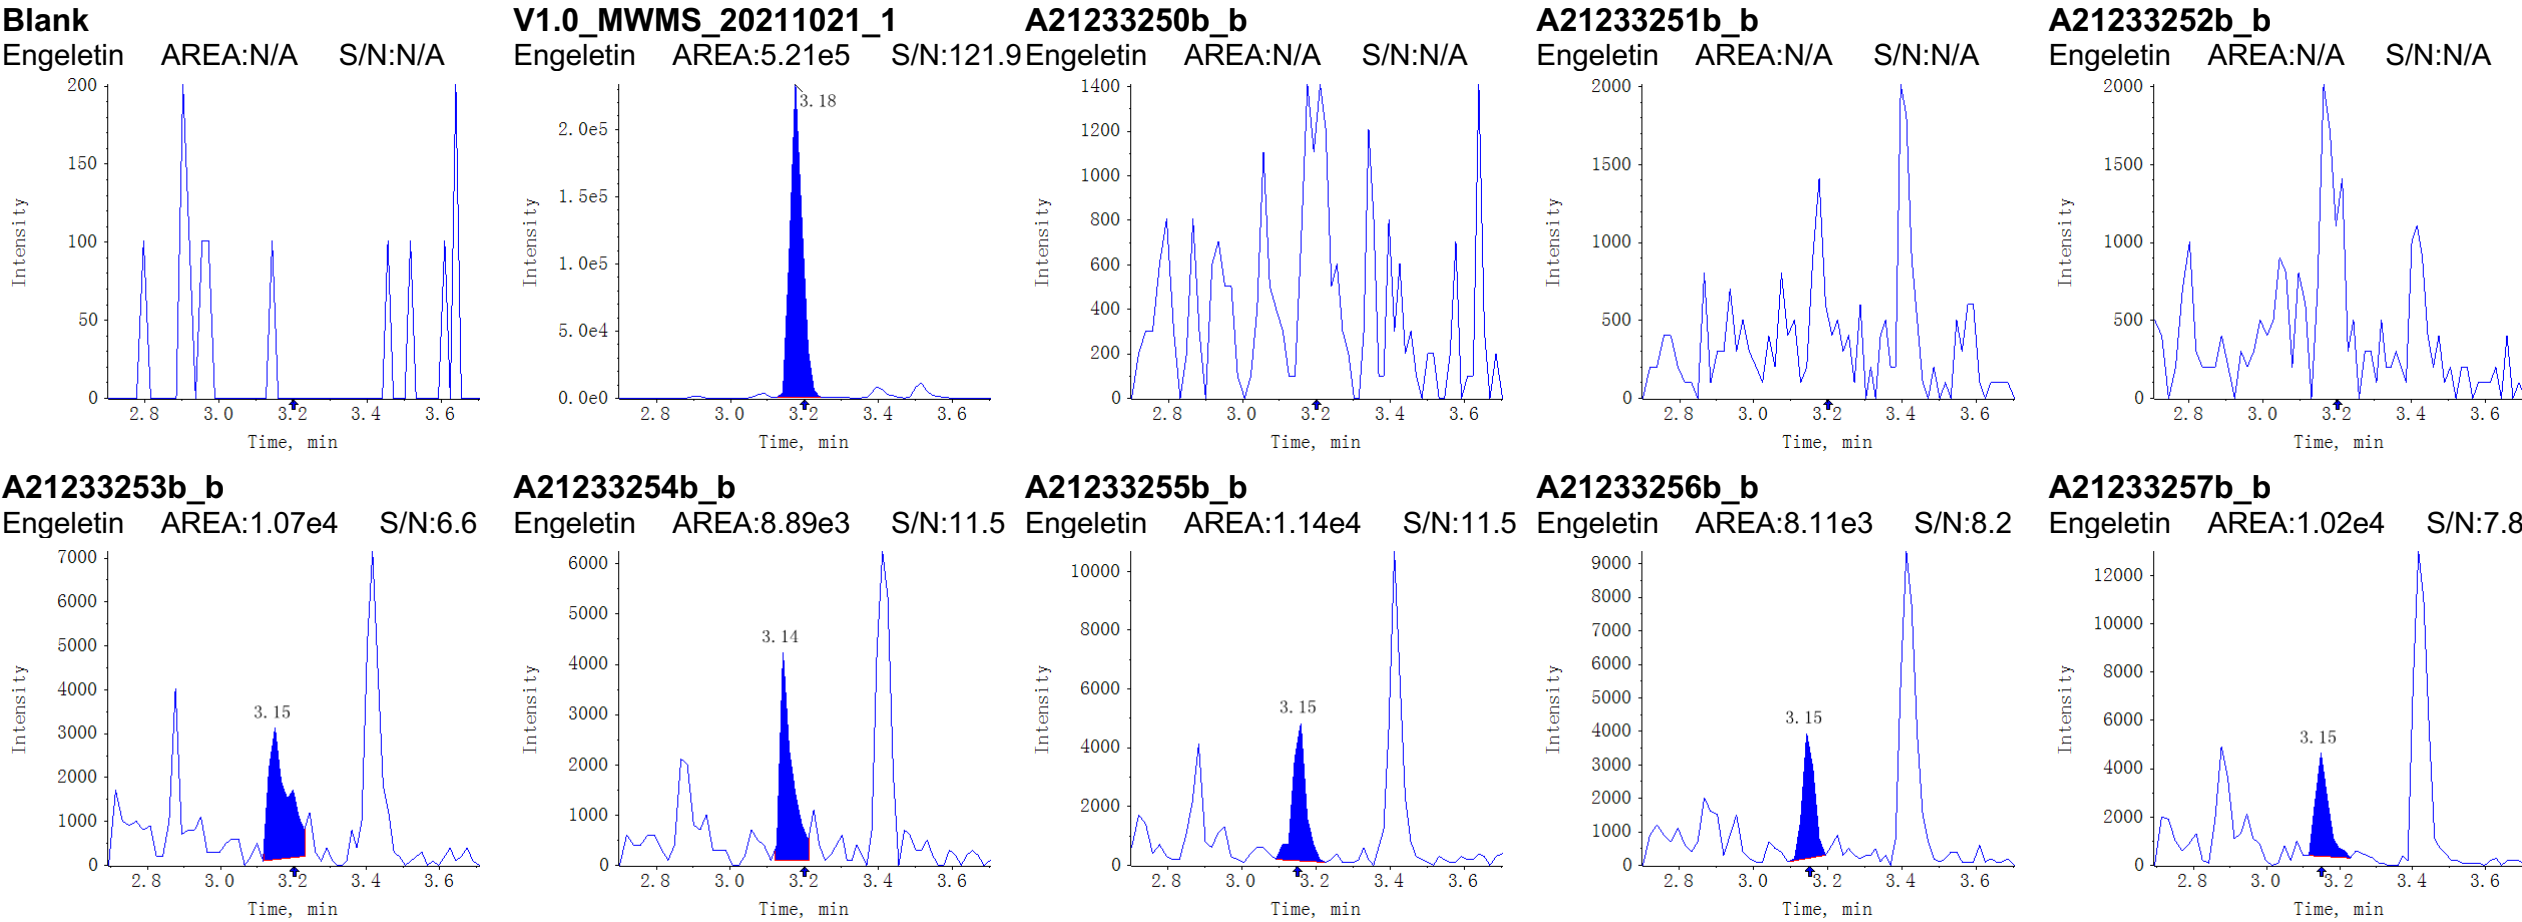

**A21233258b\_b**  
Engeletin AREA:6.44e3 S/N:7.3

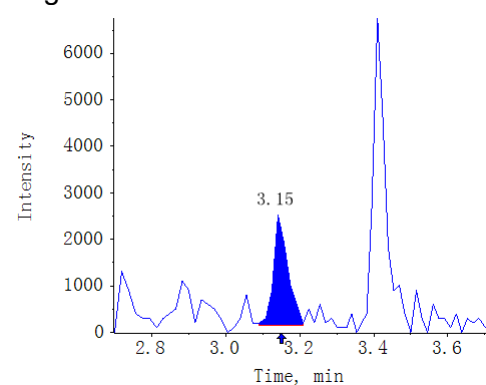

**A21233259b\_b**  
Engeletin AREA:N/A S/N:N/A

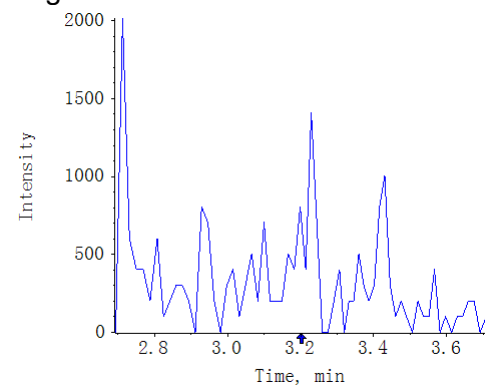

**A21233260b\_b**  
Engeletin AREA:N/A S/N:N/A

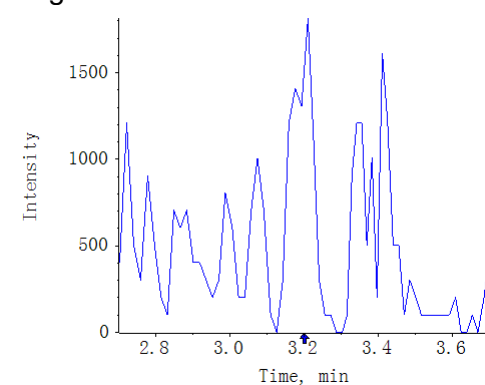

**A21233261b\_b**  
Engeletin AREA:N/A S/N:N/A

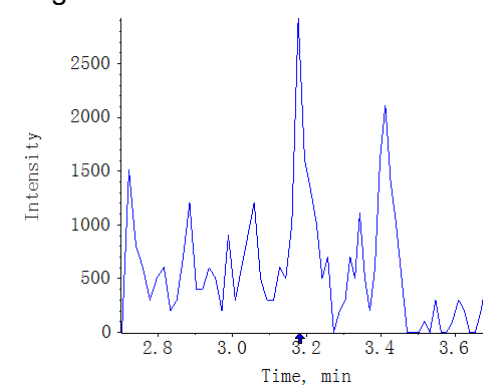

**A21233262b\_b**  
Engeletin AREA:N/A S/N:N/A

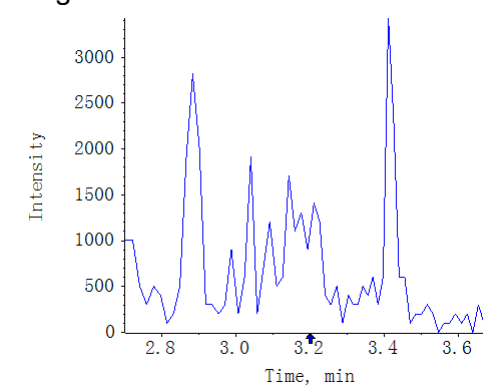

**A21233263b\_b**  
Engeletin AREA:1.18e4 S/N:5.5

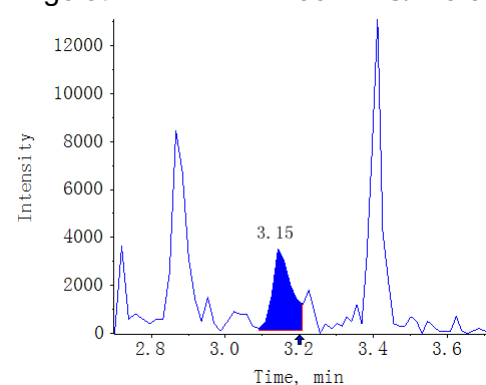

**A21233264b\_b**  
Engeletin AREA:N/A S/N:N/A

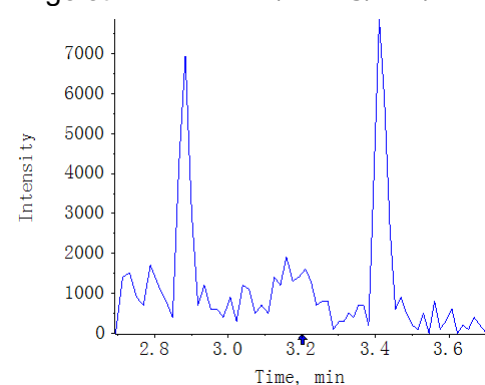

**A21233265b\_b**  
Engeletin AREA:1.05e4 S/N:3.8

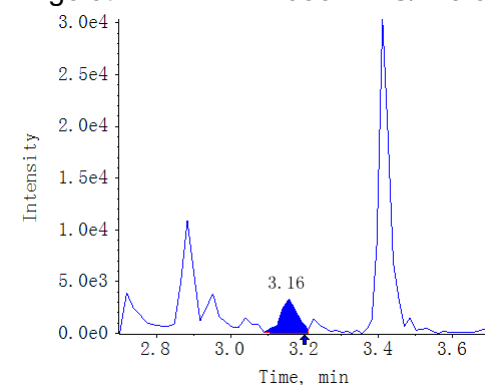

**A21233266b\_b**  
Engeletin AREA:7.96e3 S/N:4.6

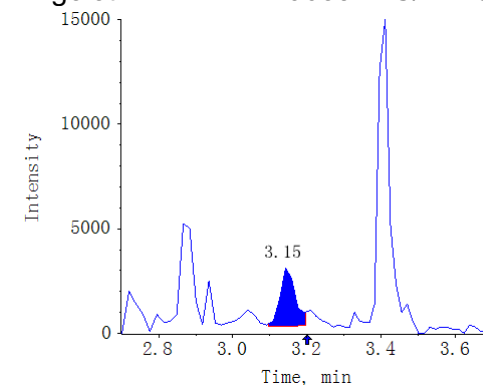

**A21233267b\_b**  
Engeletin AREA:N/A S/N:N/A

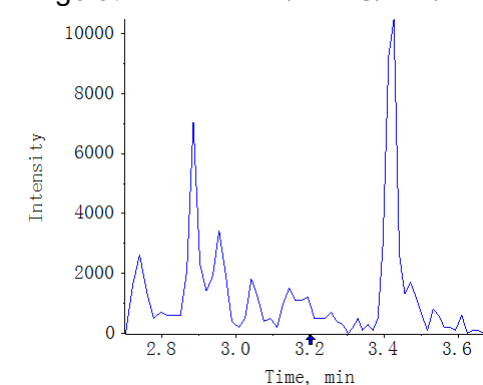

|                    |                                                    |                 |                      |
|--------------------|----------------------------------------------------|-----------------|----------------------|
| Result Table       | MWXS-21-2101D-3_18_WH6500-5_A20-3_V1.0_TY_20211028 | Algorithm Used  | MQ4                  |
| Acquisition Method | Flavonoids_V1.0_WH6500-5_LT_20211025.dam           | Instrument Name | QTRAP 6500+ Low Mass |
| Project            | N/A                                                | Analytes QTY    | 204:94               |

**Compound name: Narcissin (623.2 / 315.1)**

| Sample Name           | Sample Type     | Area (cps) | Is Area (cps) | RT (min) | S/N   | Target Conc | Calculated Conc.() |
|-----------------------|-----------------|------------|---------------|----------|-------|-------------|--------------------|
| STD_0.5nM             | Standard        | 3.35e3     | N/A           | 2.87     | 25.1  | 0.5000      | 5.836912e-1        |
| STD_1nM               | Standard        | 7.17e3     | N/A           | 2.86     | 21.7  | 1.0000      | 1.136665e0         |
| STD_5nM               | Standard        | 4.94e4     | N/A           | 2.86     | 123.9 | 5.0000      | 7.254035e0         |
| STD_10nM              | Standard        | 7.19e4     | N/A           | 2.86     | 120.1 | 10.0000     | 1.051355e1         |
| STD_20nM              | Standard        | 1.25e5     | N/A           | 2.86     | 105.9 | 20.0000     | 1.816957e1         |
| STD_50nM              | Standard        | 3.45e5     | N/A           | 2.86     | 154.2 | 50.0000     | 5.004327e1         |
| STD_100nM             | Standard        | 6.72e5     | N/A           | 2.87     | 143.0 | 100.0000    | 9.741983e1         |
| STD_200nM             | Standard        | 1.39e6     | N/A           | 2.86     | 171.7 | 200.0000    | 2.013794e2         |
| STD_500nM             | Standard        | N/A        | N/A           | N/A      | N/A   | 500.0000    | N/A                |
| STD_1000nM            | Standard        | N/A        | N/A           | N/A      | N/A   | 1000.0000   | N/A                |
| STD_2000nM            | Standard        | N/A        | N/A           | N/A      | N/A   | 2000.0000   | N/A                |
| V1.0_MW_RQC1_20211018 | Quality Control | 1.58e6     | N/A           | 2.85     | 150.3 | 0.0000      | 2.293237e2         |
| Blank                 | Unknown         | N/A        | N/A           | N/A      | N/A   | N/A         | N/A                |
| V1.0_MWMS_20211021_1  | Unknown         | 1.14e6     | N/A           | 2.87     | 199.2 | N/A         | 1.649882e2         |
| MWXS212101D3_R1       | Quality Control | 1.21e6     | N/A           | 2.87     | 154.3 | 0.0000      | 1.757288e2         |
| MWXS212101D3_R2       | Quality Control | 1.17e6     | N/A           | 2.87     | 165.0 | 0.0000      | 1.701694e2         |
| MWXS212101D3_R3       | Quality Control | 1.18e6     | N/A           | 2.87     | 201.3 | 0.0000      | 1.709834e2         |
| A21233250b_b          | Unknown         | 7.53e5     | N/A           | 2.87     | 253.2 | N/A         | 1.092459e2         |
| A21233251b_b          | Unknown         | 5.75e5     | N/A           | 2.87     | 219.6 | N/A         | 8.342214e1         |
| A21233252b_b          | Unknown         | 4.64e5     | N/A           | 2.87     | 240.6 | N/A         | 6.730327e1         |
| A21233253b_b          | Unknown         | 1.74e6     | N/A           | 2.87     | 345.8 | N/A         | 2.521510e2         |
| A21233254b_b          | Unknown         | 3.14e5     | N/A           | 2.87     | 162.8 | N/A         | 4.560505e1         |
| A21233255b_b          | Unknown         | 2.86e5     | N/A           | 2.87     | 174.2 | N/A         | 4.154211e1         |
| A21233256b_b          | Unknown         | 3.05e5     | N/A           | 2.87     | 169.5 | N/A         | 4.429247e1         |
| A21233257b_b          | Unknown         | 1.99e5     | N/A           | 2.87     | 160.6 | N/A         | 2.896388e1         |
| A21233258b_b          | Unknown         | 2.22e5     | N/A           | 2.87     | 168.5 | N/A         | 3.226761e1         |
| A21233259b_b          | Unknown         | 2.77e5     | N/A           | 2.87     | 208.5 | N/A         | 4.022332e1         |
| A21233260b_b          | Unknown         | 4.14e5     | N/A           | 2.87     | 202.0 | N/A         | 6.015648e1         |
| A21233261b_b          | Unknown         | 3.47e5     | N/A           | 2.87     | 214.2 | N/A         | 5.034762e1         |
| A21233262b_b          | Unknown         | 3.83e5     | N/A           | 2.87     | 246.5 | N/A         | 5.563878e1         |
| A21233263b_b          | Unknown         | 4.97e5     | N/A           | 2.86     | 222.8 | N/A         | 7.214726e1         |
| A21233264b_b          | Unknown         | 6.19e5     | N/A           | 2.87     | 266.6 | N/A         | 8.982567e1         |
| A21233265b_b          | Unknown         | 3.64e5     | N/A           | 2.87     | 238.3 | N/A         | 5.280559e1         |
| A21233266b_b          | Unknown         | 3.44e5     | N/A           | 2.86     | 281.7 | N/A         | 4.991199e1         |
| A21233267b_b          | Unknown         | 2.94e5     | N/A           | 2.88     | 155.9 | N/A         | 4.273172e1         |

Compound name: Narcissin

Regression Equation:  $y = 6901.58193x - 675.92267$  ( $r = 0.99975$ ) (weighting: None)

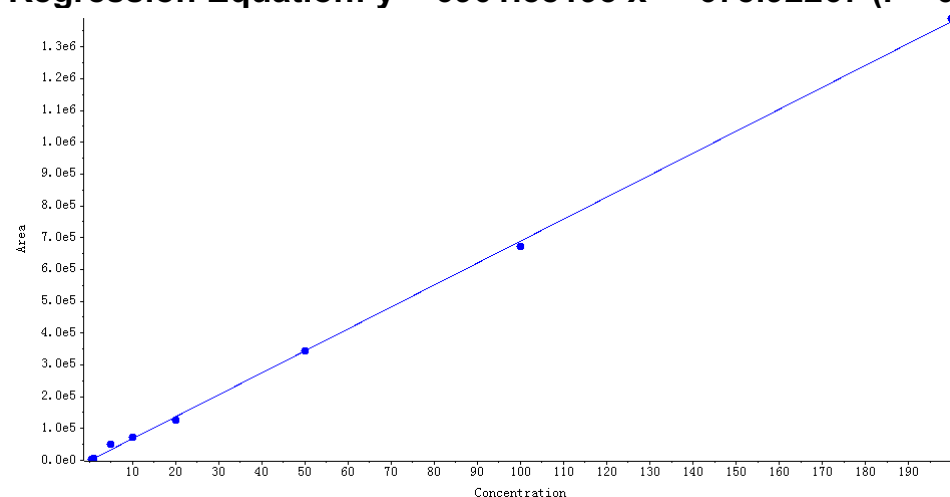

### Peak Review

| Blank                      | V1.0_MWMS_20211021_1            | A21233250b_b                    | A21233251b_b                    | A21233252b_b                    |
|----------------------------|---------------------------------|---------------------------------|---------------------------------|---------------------------------|
| Narcissin AREA:N/A S/N:N/A | Narcissin AREA:1.14e6 S/N:199.2 | Narcissin AREA:7.53e5 S/N:253.2 | Narcissin AREA:5.75e5 S/N:219.6 | Narcissin AREA:4.64e5 S/N:240.6 |

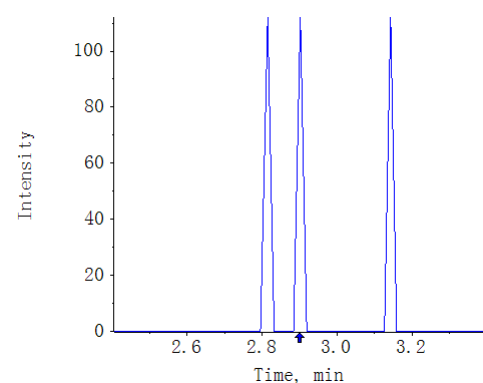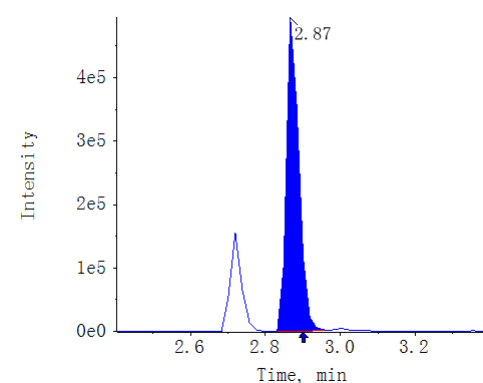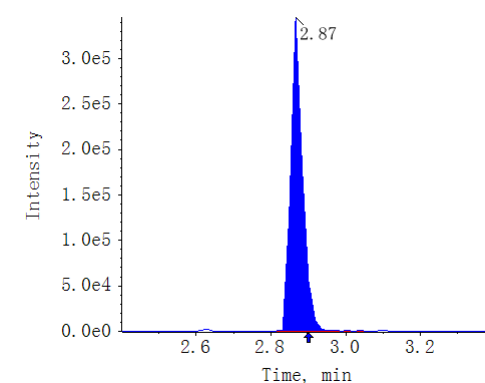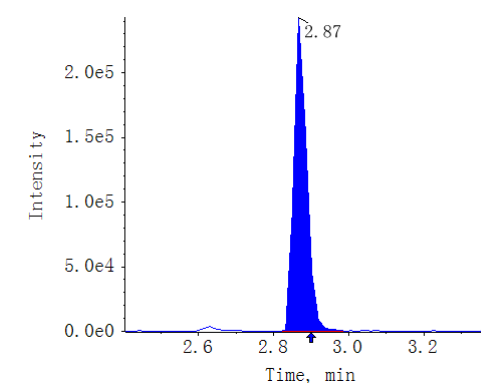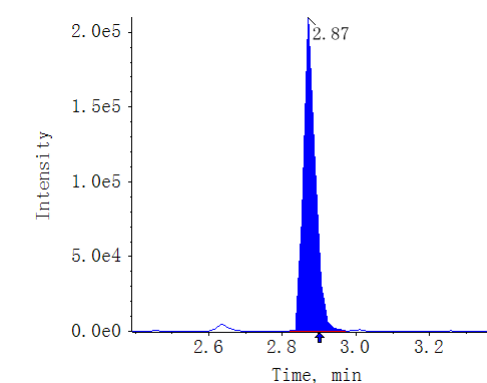

| A21233253b_b                    | A21233254b_b                    | A21233255b_b                    | A21233256b_b                    | A21233257b_b                    |
|---------------------------------|---------------------------------|---------------------------------|---------------------------------|---------------------------------|
| Narcissin AREA:1.74e6 S/N:345.8 | Narcissin AREA:3.14e5 S/N:162.8 | Narcissin AREA:2.86e5 S/N:174.2 | Narcissin AREA:3.05e5 S/N:169.5 | Narcissin AREA:1.99e5 S/N:160.6 |

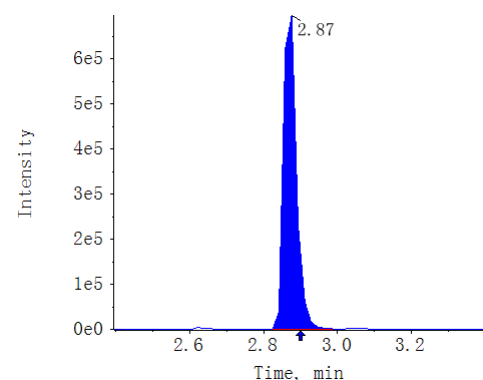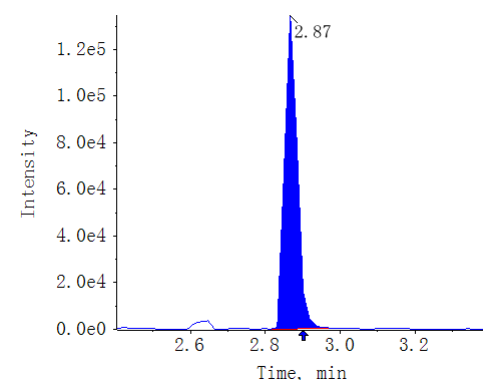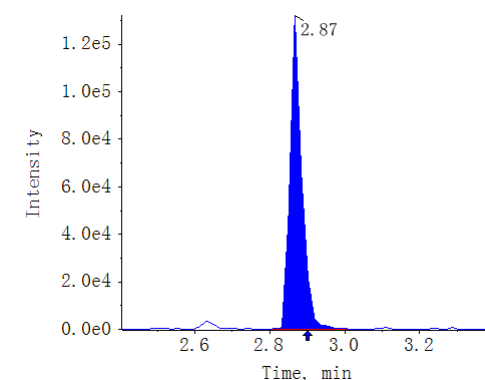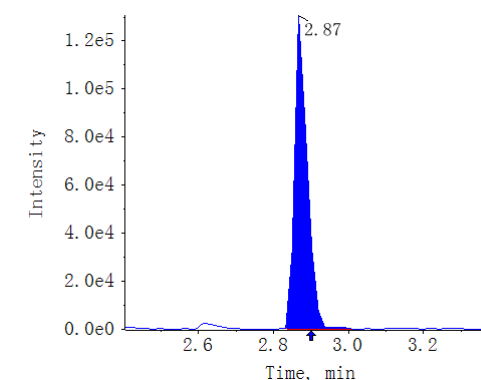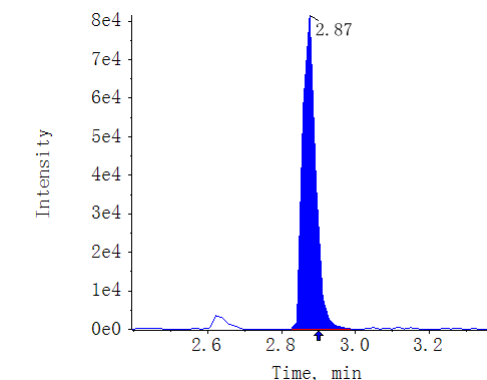

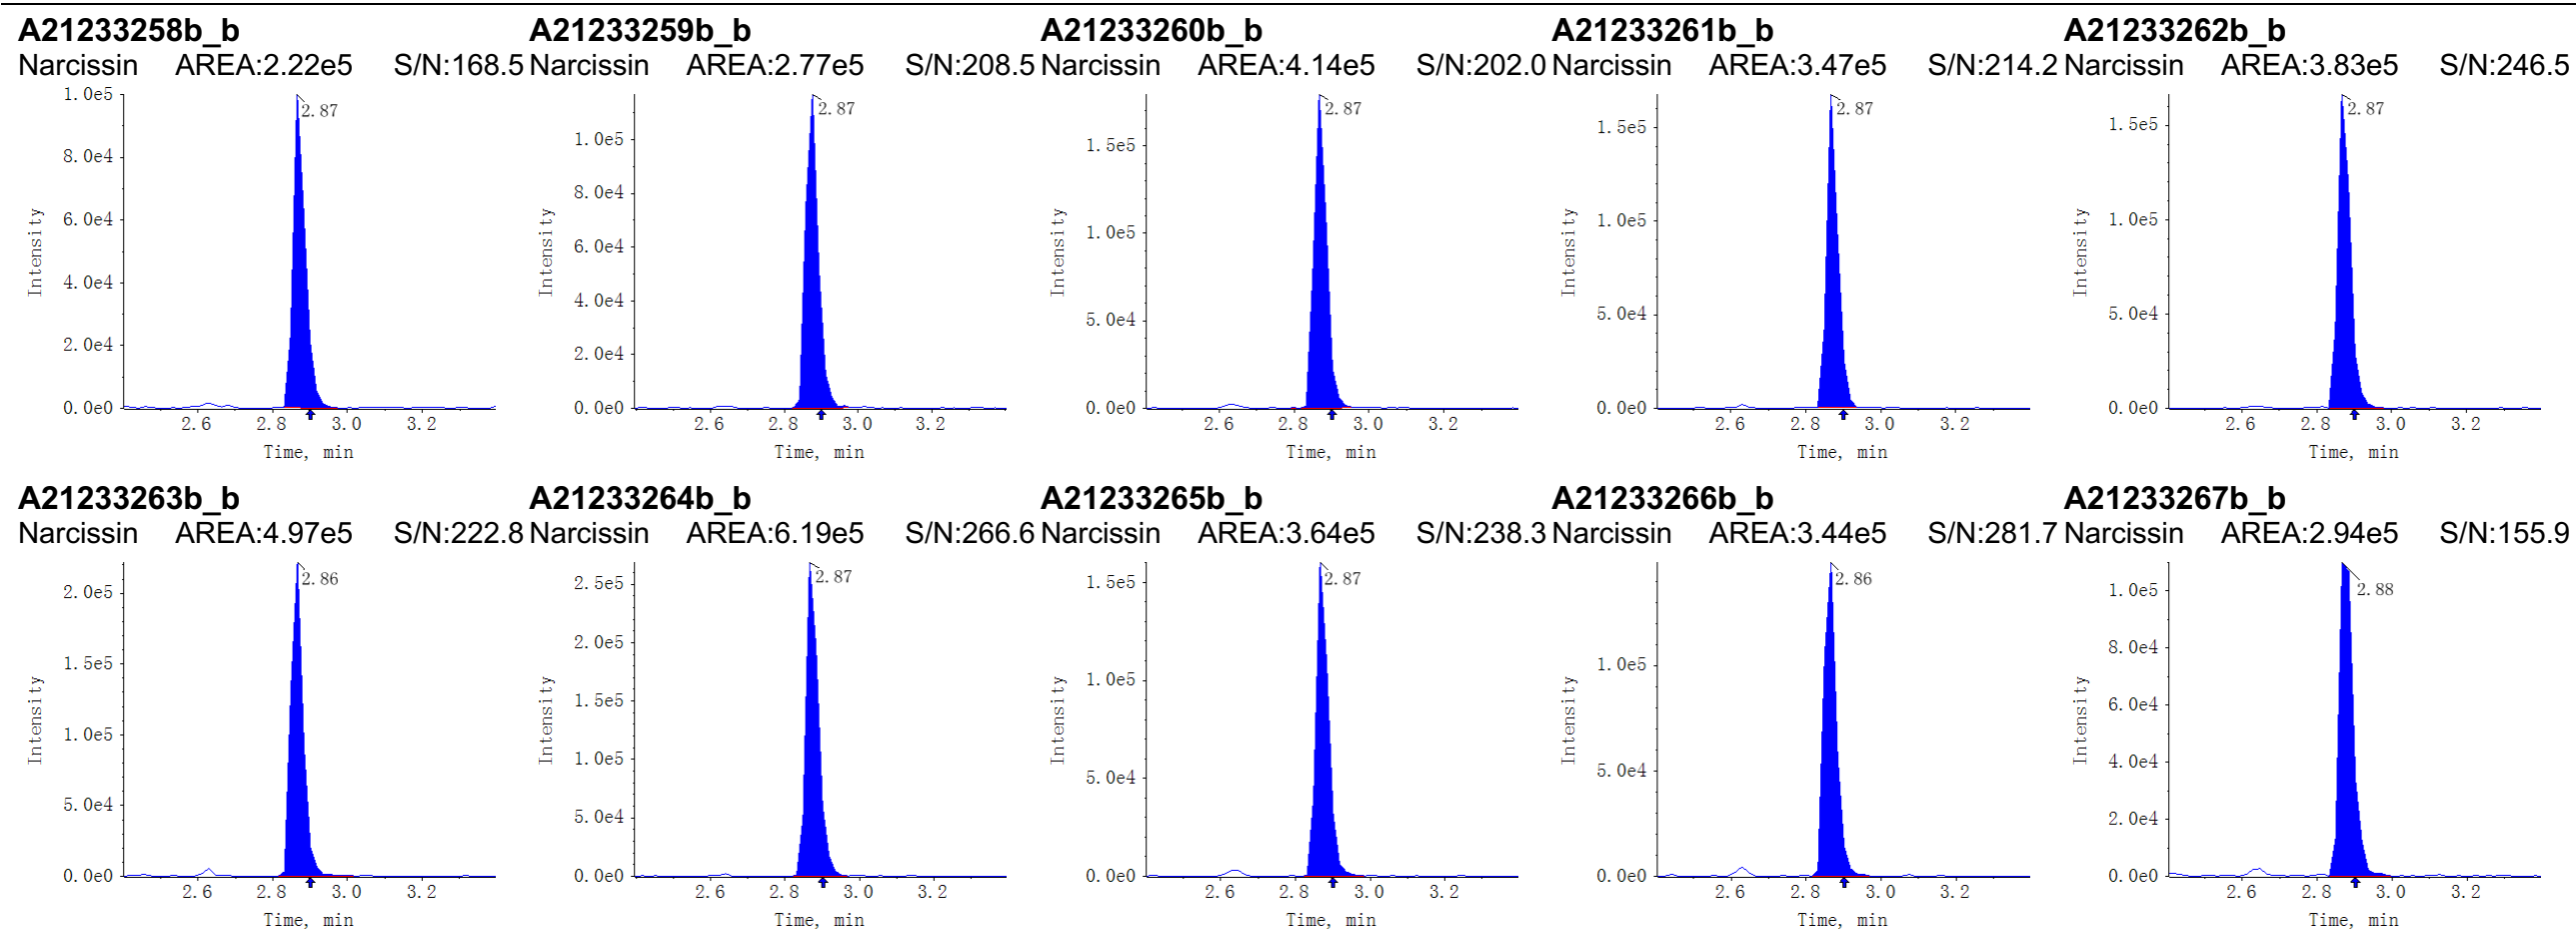

|                    |                                                    |                 |                      |
|--------------------|----------------------------------------------------|-----------------|----------------------|
| Result Table       | MWXS-21-2101D-3_18_WH6500-5_A20-3_V1.0_TY_20211028 | Algorithm Used  | MQ4                  |
| Acquisition Method | Flavonoids_V1.0_WH6500-5_LT_20211025.dam           | Instrument Name | QTRAP 6500+ Low Mass |
| Project            | N/A                                                | Analytes QTY    | 204:95               |

**Compound name: Astragalin (447.1 / 284.0)**

| Sample Name           | Sample Type     | Area (cps) | Is Area (cps) | RT (min) | S/N   | Target Conc | Calculated Conc.() |
|-----------------------|-----------------|------------|---------------|----------|-------|-------------|--------------------|
| STD_0.5nM             | Standard        | 6.36e3     | N/A           | 3.01     | 37.7  | 0.5000      | 4.115691e-1        |
| STD_1nM               | Standard        | 9.84e3     | N/A           | 2.98     | 43.5  | 1.0000      | 7.446589e-1        |
| STD_5nM               | Standard        | 7.48e4     | N/A           | 2.99     | 107.8 | 5.0000      | 6.963325e0         |
| STD_10nM              | Standard        | 1.08e5     | N/A           | 2.98     | 120.8 | 10.0000     | 1.016999e1         |
| STD_20nM              | Standard        | 2.14e5     | N/A           | 2.98     | 94.9  | 20.0000     | 2.028975e1         |
| STD_50nM              | Standard        | 5.43e5     | N/A           | 2.99     | 149.3 | 50.0000     | 5.186810e1         |
| STD_100nM             | Standard        | 1.03e6     | N/A           | 2.99     | 141.4 | 100.0000    | 9.808537e1         |
| STD_200nM             | Standard        | 2.07e6     | N/A           | 2.99     | 172.8 | 200.0000    | 1.979672e2         |
| STD_500nM             | Standard        | N/A        | N/A           | N/A      | N/A   | 500.0000    | N/A                |
| STD_1000nM            | Standard        | N/A        | N/A           | N/A      | N/A   | 1000.0000   | N/A                |
| STD_2000nM            | Standard        | N/A        | N/A           | N/A      | N/A   | 2000.0000   | N/A                |
| V1.0_MW_RQC1_20211018 | Quality Control | N/A        | N/A           | N/A      | N/A   | 0.0000      | N/A                |
| Blank                 | Unknown         | N/A        | N/A           | N/A      | N/A   | N/A         | N/A                |
| V1.0_MWMS_20211021_1  | Unknown         | 1.79e6     | N/A           | 3.00     | 140.7 | N/A         | 1.715397e2         |
| MWXS212101D3_R1       | Quality Control | 1.83e6     | N/A           | 2.99     | 168.5 | 0.0000      | 1.748287e2         |
| MWXS212101D3_R2       | Quality Control | 1.72e6     | N/A           | 3.00     | 145.7 | 0.0000      | 1.646547e2         |
| MWXS212101D3_R3       | Quality Control | 1.74e6     | N/A           | 3.00     | 132.1 | 0.0000      | 1.663075e2         |
| A21233250b_b          | Unknown         | 3.07e5     | N/A           | 2.99     | 55.5  | N/A         | 2.922150e1         |
| A21233251b_b          | Unknown         | 1.82e5     | N/A           | 2.99     | 54.5  | N/A         | 1.720590e1         |
| A21233252b_b          | Unknown         | 2.59e5     | N/A           | 3.00     | 72.4  | N/A         | 2.461874e1         |
| A21233253b_b          | Unknown         | 7.19e4     | N/A           | 3.00     | 32.3  | N/A         | 6.690672e0         |
| A21233254b_b          | Unknown         | 1.10e5     | N/A           | 2.99     | 44.4  | N/A         | 1.036509e1         |
| A21233255b_b          | Unknown         | 1.49e5     | N/A           | 3.00     | 40.5  | N/A         | 1.406952e1         |
| A21233256b_b          | Unknown         | 6.87e4     | N/A           | 3.00     | 30.5  | N/A         | 6.380573e0         |
| A21233257b_b          | Unknown         | 1.57e5     | N/A           | 3.00     | 38.7  | N/A         | 1.485250e1         |
| A21233258b_b          | Unknown         | 3.87e4     | N/A           | 3.00     | 18.1  | N/A         | 3.511016e0         |
| A21233259b_b          | Unknown         | 4.51e4     | N/A           | 3.00     | 19.8  | N/A         | 4.124700e0         |
| A21233260b_b          | Unknown         | 1.33e5     | N/A           | 3.00     | 34.9  | N/A         | 1.250321e1         |
| A21233261b_b          | Unknown         | 1.41e5     | N/A           | 3.00     | 29.4  | N/A         | 1.330817e1         |
| A21233262b_b          | Unknown         | 8.07e4     | N/A           | 3.00     | 31.4  | N/A         | 7.535651e0         |
| A21233263b_b          | Unknown         | 1.22e5     | N/A           | 2.99     | 43.0  | N/A         | 1.145482e1         |
| A21233264b_b          | Unknown         | 8.06e4     | N/A           | 3.00     | 25.8  | N/A         | 7.526193e0         |
| A21233265b_b          | Unknown         | 4.54e5     | N/A           | 3.00     | 43.2  | N/A         | 4.331828e1         |
| A21233266b_b          | Unknown         | 1.18e5     | N/A           | 2.99     | 26.7  | N/A         | 1.110618e1         |
| A21233267b_b          | Unknown         | 5.67e4     | N/A           | 3.00     | 10.2  | N/A         | 5.233165e0         |

Compound name: Astragalin

Regression Equation:  $y = 10438.36926x + 2065.53246$  ( $r = 0.99866$ ) (weighting:  $1/x$ )

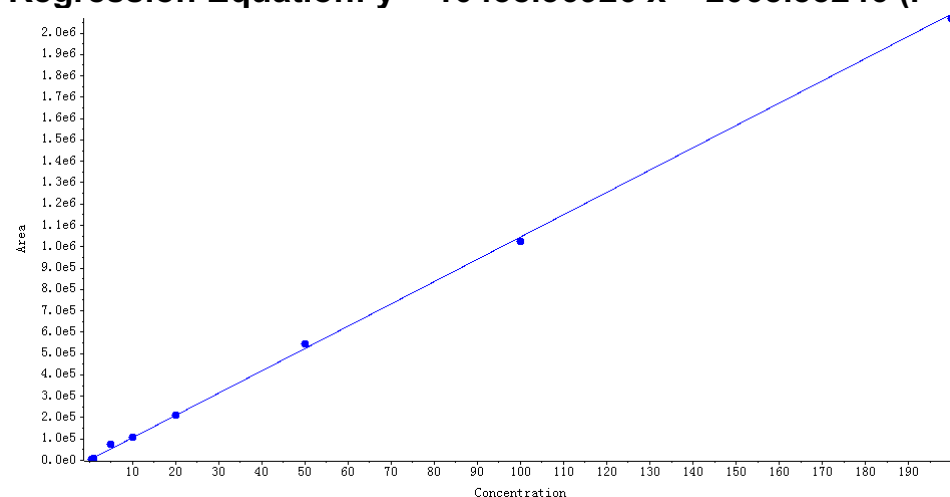

### Peak Review

Blank

Astragalin AREA:N/A S/N:N/A

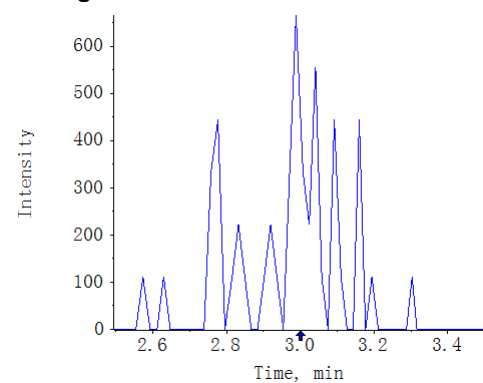

V1.0\_MWMS\_20211021\_1

Astragalin AREA:1.79e6 S/N:140.7

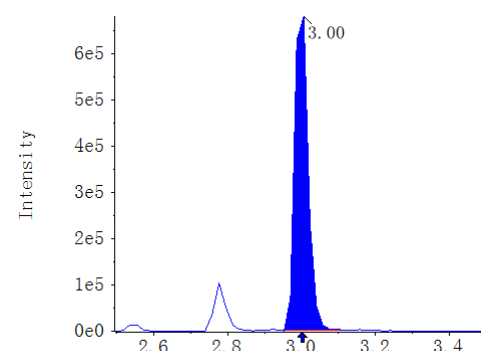

A21233250b\_b

Astragalin AREA:3.07e5 S/N:55.5

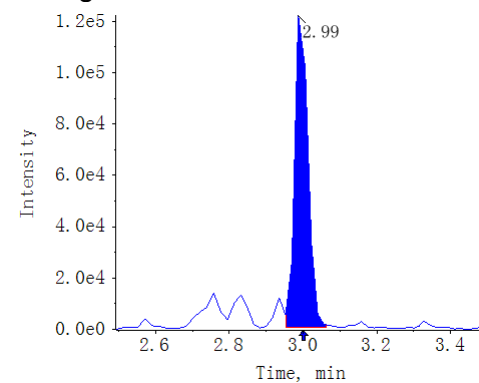

A21233251b\_b

Astragalin AREA:1.82e5 S/N:54.5

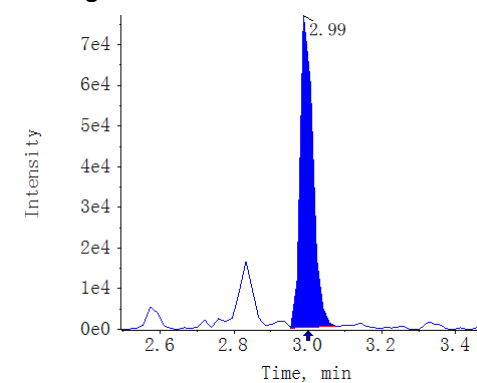

A21233252b\_b

Astragalin AREA:2.59e5 S/N:72.4

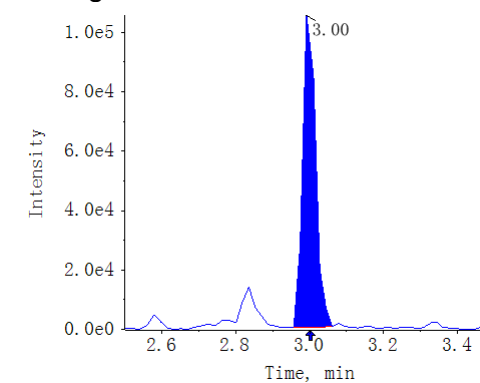

A21233253b\_b

Astragalin AREA:7.19e4 S/N:32.3

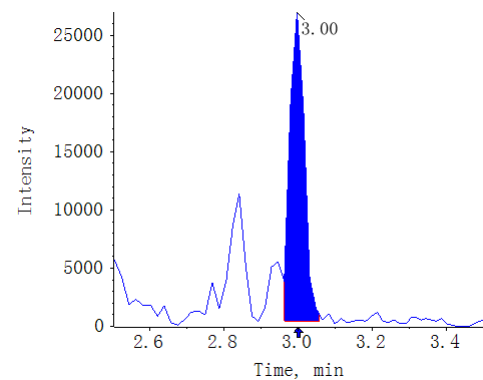

A21233254b\_b

Astragalin AREA:1.10e5 S/N:44.4

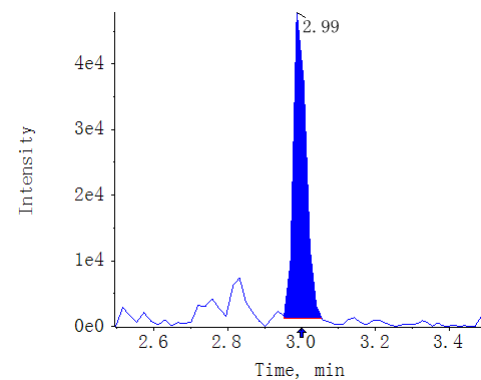

A21233255b\_b

Astragalin AREA:1.49e5 S/N:40.5

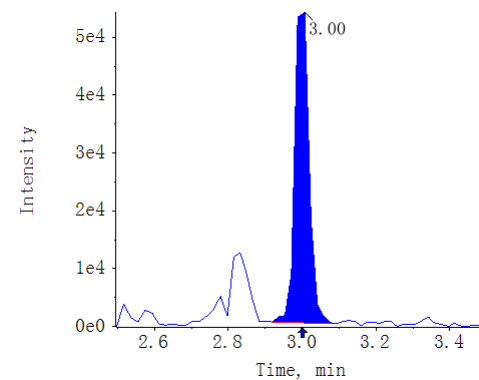

A21233256b\_b

Astragalin AREA:6.87e4 S/N:30.5

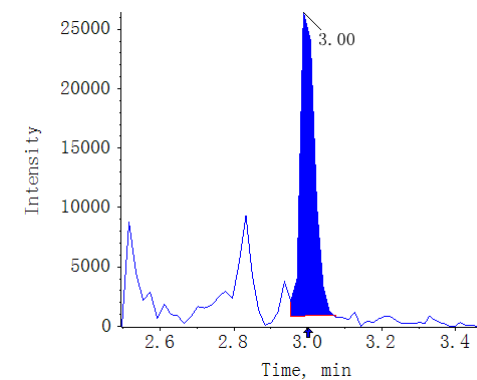

A21233257b\_b

Astragalin AREA:1.57e5 S/N:38.7

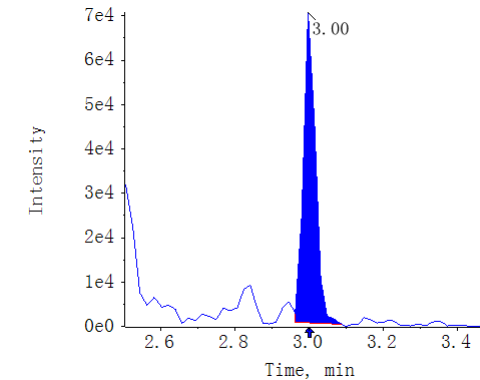

**A21233258b\_b**

Astragalin AREA:3.87e4 S/N:18.1

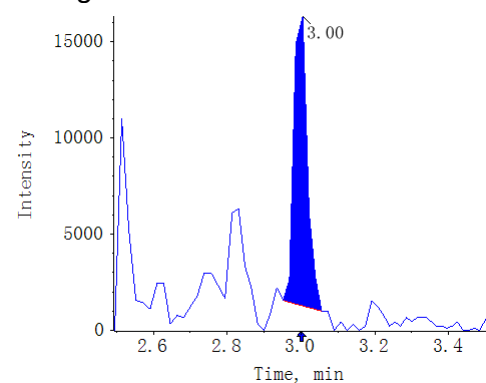

**A21233259b\_b**

Astragalin AREA:4.51e4 S/N:19.8

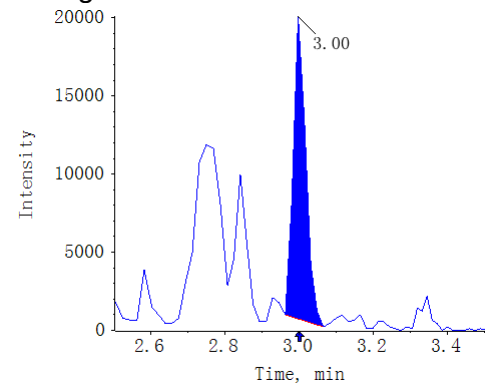

**A21233260b\_b**

Astragalin AREA:1.33e5 S/N:34.9

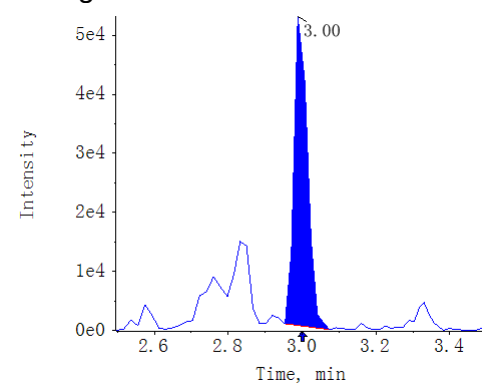

**A21233261b\_b**

Astragalin AREA:1.41e5 S/N:29.4

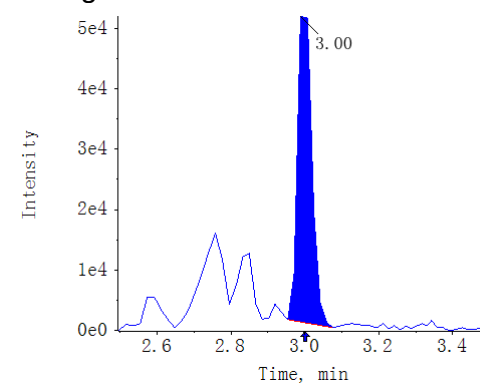

**A21233262b\_b**

Astragalin AREA:8.07e4 S/N:31.4

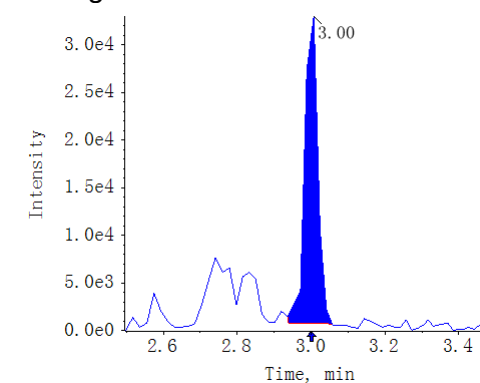

**A21233263b\_b**

Astragalin AREA:1.22e5 S/N:43.0

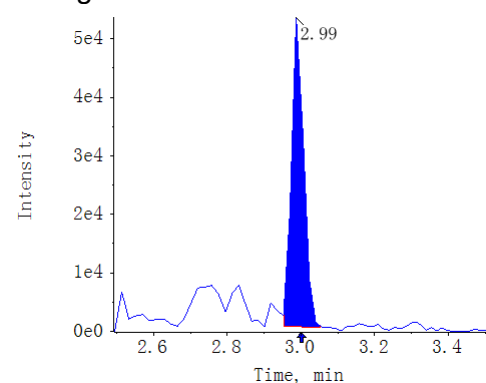

**A21233264b\_b**

Astragalin AREA:8.06e4 S/N:25.8

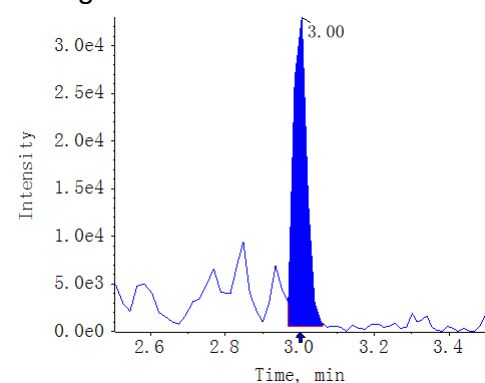

**A21233265b\_b**

Astragalin AREA:4.54e5 S/N:43.2

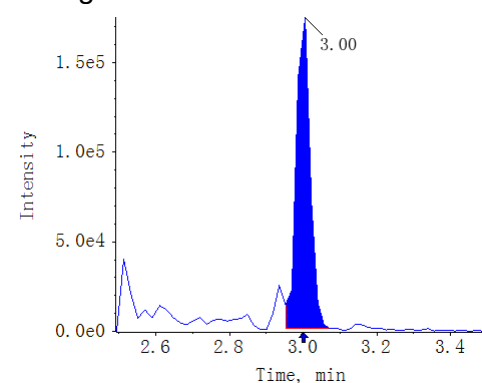

**A21233266b\_b**

Astragalin AREA:1.18e5 S/N:26.7

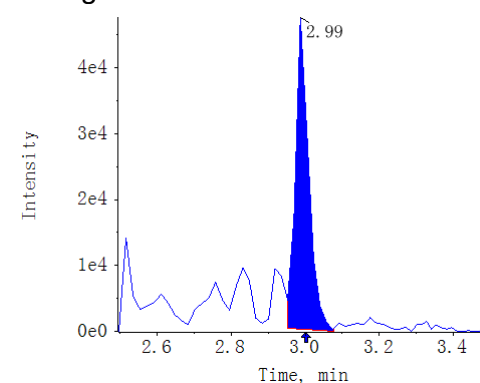

**A21233267b\_b**

Astragalin AREA:5.67e4 S/N:10.2

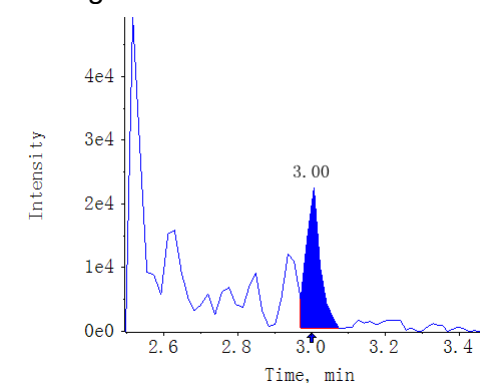

|                    |                                                    |                 |                      |
|--------------------|----------------------------------------------------|-----------------|----------------------|
| Result Table       | MWXS-21-2101D-3_18_WH6500-5_A20-3_V1.0_TY_20211028 | Algorithm Used  | MQ4                  |
| Acquisition Method | Flavonoids_V1.0_WH6500-5_LT_20211025.dam           | Instrument Name | QTRAP 6500+ Low Mass |
| Project            | N/A                                                | Analytes QTY    | 204:100              |

**Compound name: Silychristin (481.1 / 125.0)**

| Sample Name           | Sample Type     | Area (cps) | Is Area (cps) | RT (min) | S/N   | Target Conc | Calculated Conc.() |
|-----------------------|-----------------|------------|---------------|----------|-------|-------------|--------------------|
| STD_0.5nM             | Standard        | 1.64e3     | N/A           | 3.60     | 13.1  | 0.5000      | 3.200131e-1        |
| STD_1nM               | Standard        | 4.00e3     | N/A           | 3.59     | 25.1  | 1.0000      | 8.543609e-1        |
| STD_5nM               | Standard        | 3.26e4     | N/A           | 3.60     | 142.7 | 5.0000      | 7.350802e0         |
| STD_10nM              | Standard        | 4.84e4     | N/A           | 3.60     | 158.6 | 10.0000     | 1.093336e1         |
| STD_20nM              | Standard        | 8.30e4     | N/A           | 3.60     | 158.8 | 20.0000     | 1.877133e1         |
| STD_50nM              | Standard        | 2.30e5     | N/A           | 3.60     | 218.1 | 50.0000     | 5.200960e1         |
| STD_100nM             | Standard        | 4.25e5     | N/A           | 3.61     | 352.7 | 100.0000    | 9.641101e1         |
| STD_200nM             | Standard        | 8.81e5     | N/A           | 3.59     | 290.0 | 200.0000    | 1.998495e2         |
| STD_500nM             | Standard        | N/A        | N/A           | N/A      | N/A   | 500.0000    | N/A                |
| STD_1000nM            | Standard        | N/A        | N/A           | N/A      | N/A   | 1000.0000   | N/A                |
| STD_2000nM            | Standard        | N/A        | N/A           | N/A      | N/A   | 2000.0000   | N/A                |
| V1.0_MW_RQC1_20211018 | Quality Control | 4.55e4     | N/A           | 3.51     | 27.6  | 0.0000      | 1.027043e1         |
| Blank                 | Unknown         | N/A        | N/A           | N/A      | N/A   | N/A         | N/A                |
| V1.0_MWMS_20211021_1  | Unknown         | 7.43e5     | N/A           | 3.61     | 369.7 | N/A         | 1.684876e2         |
| MWXS212101D3_R1       | Quality Control | 7.65e5     | N/A           | 3.61     | 371.0 | 0.0000      | 1.734005e2         |
| MWXS212101D3_R2       | Quality Control | 7.68e5     | N/A           | 3.61     | 308.5 | 0.0000      | 1.741906e2         |
| MWXS212101D3_R3       | Quality Control | 7.36e5     | N/A           | 3.61     | 343.6 | 0.0000      | 1.669507e2         |
| A21233250b_b          | Unknown         | N/A        | N/A           | N/A      | N/A   | N/A         | N/A                |
| A21233251b_b          | Unknown         | N/A        | N/A           | N/A      | N/A   | N/A         | N/A                |
| A21233252b_b          | Unknown         | N/A        | N/A           | N/A      | N/A   | N/A         | N/A                |
| A21233253b_b          | Unknown         | N/A        | N/A           | N/A      | N/A   | N/A         | N/A                |
| A21233254b_b          | Unknown         | 8.69e3     | N/A           | 3.55     | 21.0  | N/A         | 1.918978e0         |
| A21233255b_b          | Unknown         | 6.59e3     | N/A           | 3.53     | 19.3  | N/A         | 1.442377e0         |
| A21233256b_b          | Unknown         | 1.16e4     | N/A           | 3.55     | 16.1  | N/A         | 2.579400e0         |
| A21233257b_b          | Unknown         | 1.71e4     | N/A           | 3.55     | 31.7  | N/A         | 3.831713e0         |
| A21233258b_b          | Unknown         | 7.15e3     | N/A           | 3.55     | 14.3  | N/A         | 1.570513e0         |
| A21233259b_b          | Unknown         | N/A        | N/A           | N/A      | N/A   | N/A         | N/A                |
| A21233260b_b          | Unknown         | N/A        | N/A           | N/A      | N/A   | N/A         | N/A                |
| A21233261b_b          | Unknown         | 3.76e3     | N/A           | 3.53     | 11.4  | N/A         | 8.002980e-1        |
| A21233262b_b          | Unknown         | 3.39e3     | N/A           | 3.54     | 8.6   | N/A         | 7.178951e-1        |
| A21233263b_b          | Unknown         | N/A        | N/A           | N/A      | N/A   | N/A         | N/A                |
| A21233264b_b          | Unknown         | N/A        | N/A           | N/A      | N/A   | N/A         | N/A                |
| A21233265b_b          | Unknown         | 1.33e4     | N/A           | 3.55     | 16.6  | N/A         | 2.961493e0         |
| A21233266b_b          | Unknown         | 5.08e3     | N/A           | 3.53     | 10.2  | N/A         | 1.100529e0         |
| A21233267b_b          | Unknown         | N/A        | N/A           | N/A      | N/A   | N/A         | N/A                |

Compound name: Silychristin  
Regression Equation:  $y = 4409.39289x + 227.96057$  ( $r = 0.99788$ ) (weighting:  $1/x$ )

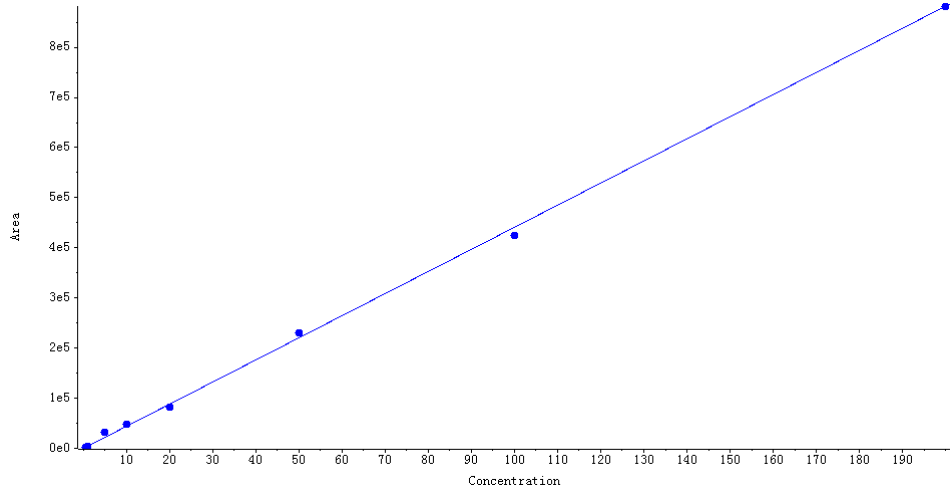

Peak Review

Blank  
Silychristin AREA:N/A S/N:N/A

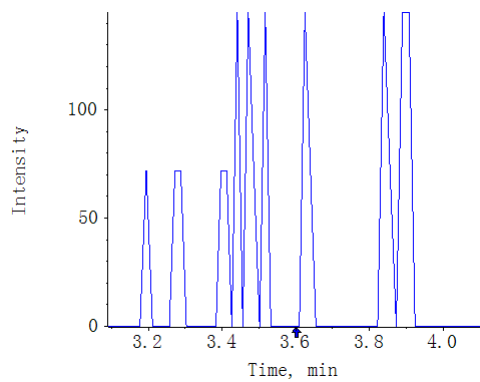

V1.0\_MWMS\_20211021\_1  
Silychristin AREA:7.43e5 S/N:369.7

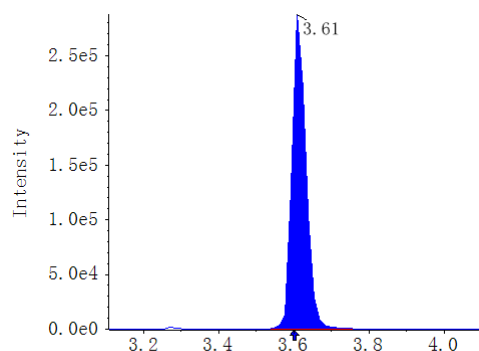

A21233250b\_b  
Silychristin AREA:N/A S/N:N/A

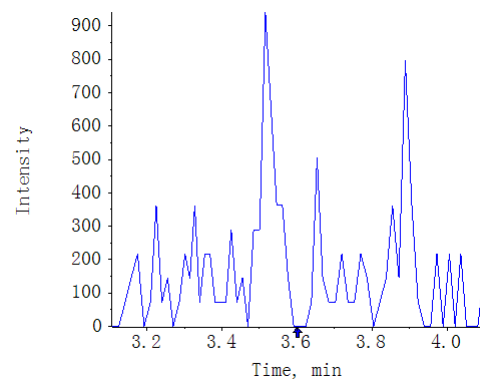

A21233251b\_b  
Silychristin AREA:N/A S/N:N/A

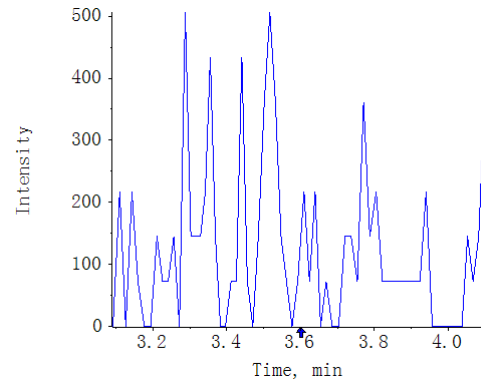

A21233252b\_b  
Silychristin AREA:N/A S/N:N/A

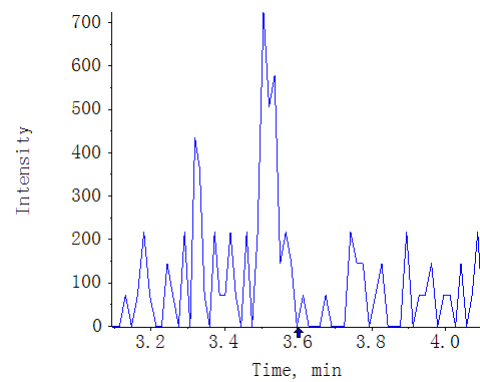

A21233253b\_b  
Silychristin AREA:N/A S/N:N/A

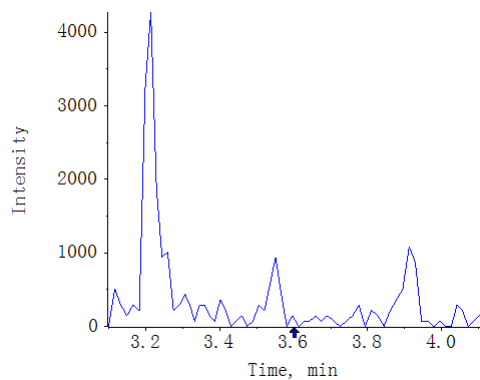

A21233254b\_b  
Silychristin AREA:8.69e3 S/N:21.0

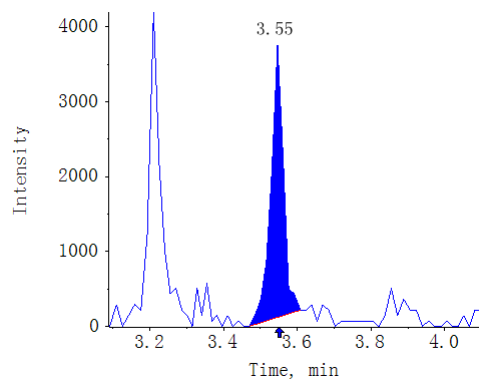

A21233255b\_b  
Silychristin AREA:6.59e3 S/N:19.3

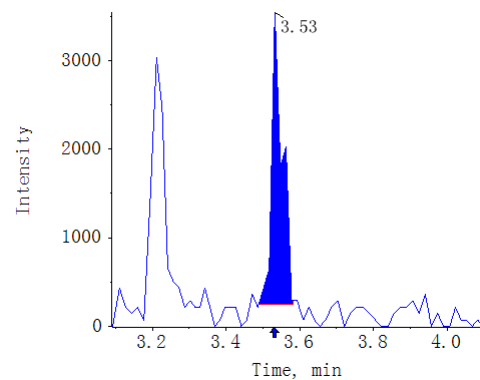

A21233256b\_b  
Silychristin AREA:1.16e4 S/N:16.1

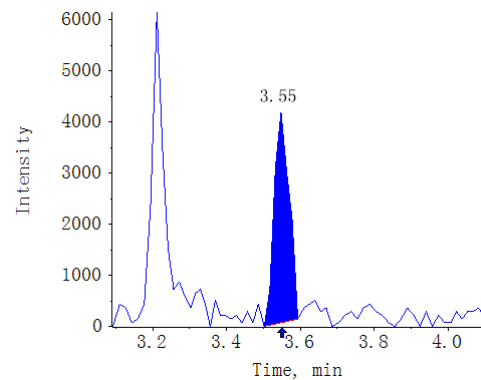

A21233257b\_b  
Silychristin AREA:1.71e4 S/N:31.7

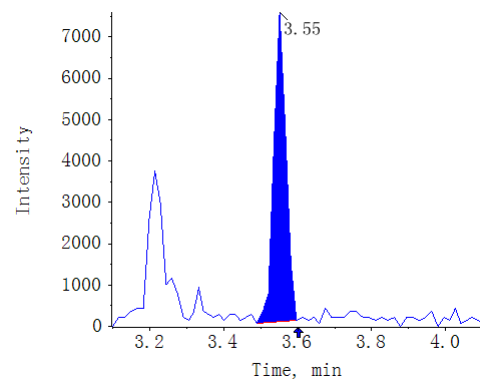

**A21233258b\_b**

Silychristin AREA:7.15e3 S/N:14.3

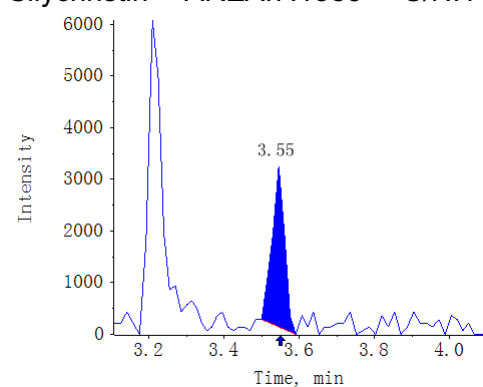

**A21233259b\_b**

Silychristin AREA:N/A S/N:N/A

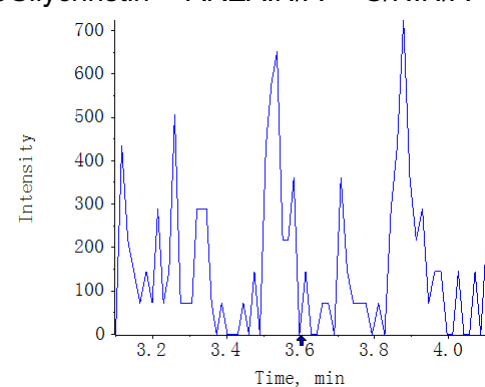

**A21233260b\_b**

Silychristin AREA:N/A S/N:N/A

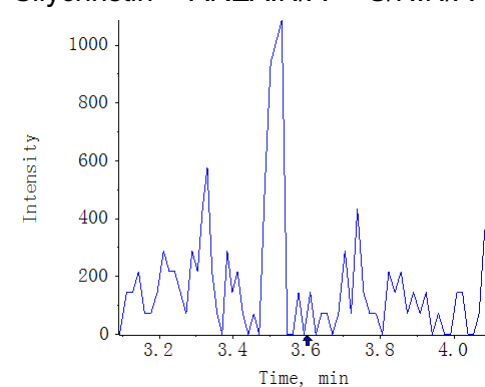

**A21233261b\_b**

Silychristin AREA:3.76e3 S/N:11.4

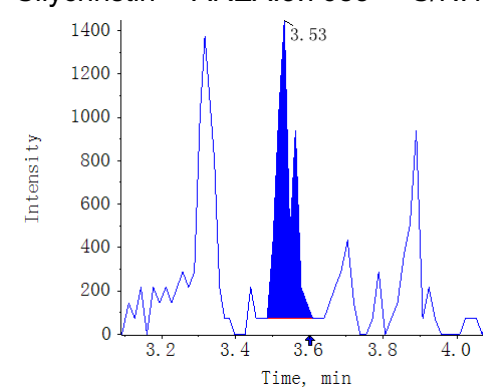

**A21233262b\_b**

Silychristin AREA:3.39e3 S/N:8.6

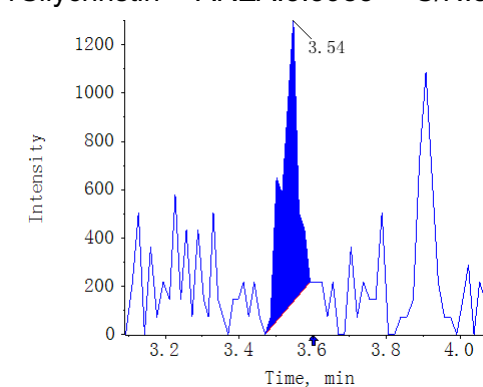

**A21233263b\_b**

Silychristin AREA:N/A S/N:N/A

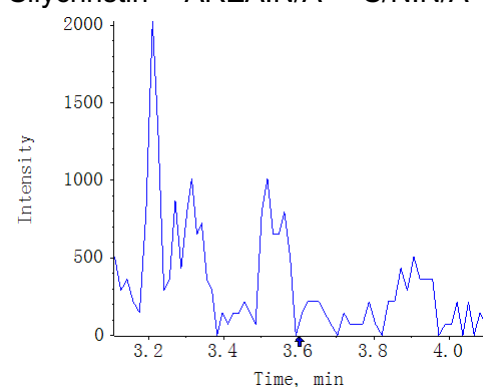

**A21233264b\_b**

Silychristin AREA:N/A S/N:N/A

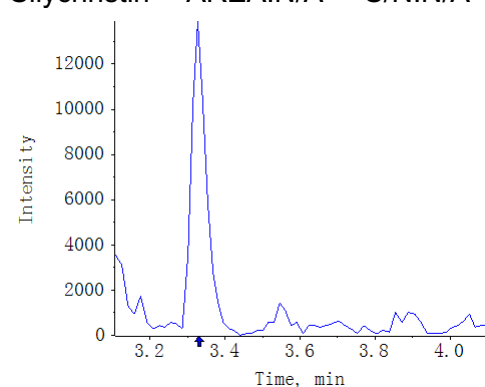

**A21233265b\_b**

Silychristin AREA:1.33e4 S/N:16.6

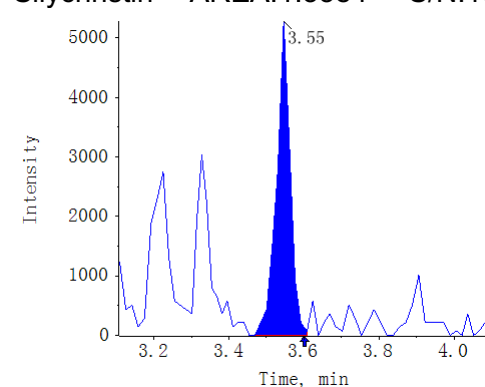

**A21233266b\_b**

Silychristin AREA:5.08e3 S/N:10.2

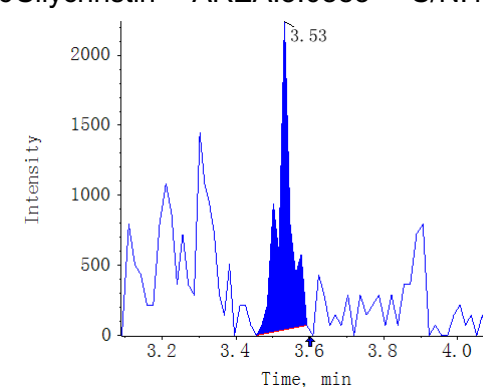

**A21233267b\_b**

Silychristin AREA:N/A S/N:N/A

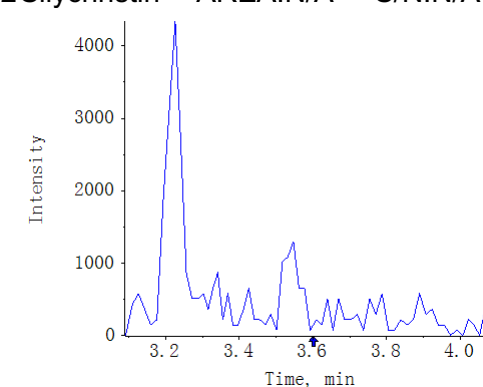

|                    |                                                    |                 |                      |
|--------------------|----------------------------------------------------|-----------------|----------------------|
| Result Table       | MWXS-21-2101D-3_18_WH6500-5_A20-3_V1.0_TY_20211028 | Algorithm Used  | MQ4                  |
| Acquisition Method | Flavonoids_V1.0_WH6500-5_LT_20211025.dam           | Instrument Name | QTRAP 6500+ Low Mass |
| Project            | N/A                                                | Analytes QTY    | 204:102              |

**Compound name: Eriodictyol (287.1 / 135.0)**

| Sample Name           | Sample Type     | Area (cps) | Is Area (cps) | RT (min) | S/N   | Target Conc | Calculated Conc.() |
|-----------------------|-----------------|------------|---------------|----------|-------|-------------|--------------------|
| STD_0.5nM             | Standard        | 2.16e3     | N/A           | 4.06     | 8.7   | 0.5000      | 5.023487e-1        |
| STD_1nM               | Standard        | 3.32e3     | N/A           | 4.04     | 14.9  | 1.0000      | 9.035317e-1        |
| STD_5nM               | Standard        | 2.09e4     | N/A           | 4.05     | 64.7  | 5.0000      | 6.960468e0         |
| STD_10nM              | Standard        | 2.66e4     | N/A           | 4.05     | 74.5  | 10.0000     | 8.937993e0         |
| STD_20nM              | Standard        | 5.42e4     | N/A           | 4.05     | 165.8 | 20.0000     | 1.844424e1         |
| STD_50nM              | Standard        | 1.44e5     | N/A           | 4.05     | 163.0 | 50.0000     | 4.937618e1         |
| STD_100nM             | Standard        | 2.97e5     | N/A           | 4.05     | 209.3 | 100.0000    | 1.021183e2         |
| STD_200nM             | Standard        | 5.79e5     | N/A           | 4.05     | 353.5 | 200.0000    | 1.992570e2         |
| STD_500nM             | Standard        | N/A        | N/A           | N/A      | N/A   | 500.0000    | N/A                |
| STD_1000nM            | Standard        | N/A        | N/A           | N/A      | N/A   | 1000.0000   | N/A                |
| STD_2000nM            | Standard        | N/A        | N/A           | N/A      | N/A   | 2000.0000   | N/A                |
| V1.0_MW_RQC1_20211018 | Quality Control | 1.93e5     | N/A           | 4.04     | 122.8 | 0.0000      | 6.639319e1         |
| Blank                 | Unknown         | N/A        | N/A           | N/A      | N/A   | N/A         | N/A                |
| V1.0_MWMS_20211021_1  | Unknown         | 4.45e5     | N/A           | 4.06     | 221.1 | N/A         | 1.529802e2         |
| MWXS212101D3_R1       | Quality Control | 4.47e5     | N/A           | 4.06     | 303.3 | 0.0000      | 1.536557e2         |
| MWXS212101D3_R2       | Quality Control | 4.30e5     | N/A           | 4.06     | 262.3 | 0.0000      | 1.477970e2         |
| MWXS212101D3_R3       | Quality Control | 4.34e5     | N/A           | 4.06     | 306.5 | 0.0000      | 1.494652e2         |
| A21233250b_b          | Unknown         | 5.64e3     | N/A           | 4.06     | 35.4  | N/A         | 1.702587e0         |
| A21233251b_b          | Unknown         | 8.49e3     | N/A           | 4.06     | 38.6  | N/A         | 2.685105e0         |
| A21233252b_b          | Unknown         | 7.29e3     | N/A           | 4.06     | 36.9  | N/A         | 2.271094e0         |
| A21233253b_b          | Unknown         | 1.38e6     | N/A           | 4.06     | 77.5  | N/A         | 4.742460e2         |
| A21233254b_b          | Unknown         | 1.48e6     | N/A           | 4.06     | 110.9 | N/A         | 5.111886e2         |
| A21233255b_b          | Unknown         | 3.05e6     | N/A           | 4.06     | 95.7  | N/A         | 1.051658e3         |
| A21233256b_b          | Unknown         | 1.87e6     | N/A           | 4.06     | 127.0 | N/A         | 6.450971e2         |
| A21233257b_b          | Unknown         | 2.90e6     | N/A           | 4.06     | 138.9 | N/A         | 1.000575e3         |
| A21233258b_b          | Unknown         | 9.13e5     | N/A           | 4.06     | 189.8 | N/A         | 3.142893e2         |
| A21233259b_b          | Unknown         | 4.50e4     | N/A           | 4.06     | 90.4  | N/A         | 1.528099e1         |
| A21233260b_b          | Unknown         | 4.37e3     | N/A           | 4.07     | 20.3  | N/A         | 1.266975e0         |
| A21233261b_b          | Unknown         | 4.90e4     | N/A           | 4.06     | 113.0 | N/A         | 1.664484e1         |
| A21233262b_b          | Unknown         | 5.01e5     | N/A           | 4.06     | 289.7 | N/A         | 1.724673e2         |
| A21233263b_b          | Unknown         | 4.51e6     | N/A           | 4.05     | 116.8 | N/A         | 1.554617e3         |
| A21233264b_b          | Unknown         | 3.74e6     | N/A           | 4.06     | 110.1 | N/A         | 1.286894e3         |
| A21233265b_b          | Unknown         | 5.50e6     | N/A           | 4.06     | 168.6 | N/A         | 1.894317e3         |
| A21233266b_b          | Unknown         | 3.32e6     | N/A           | 4.05     | 110.4 | N/A         | 1.142704e3         |
| A21233267b_b          | Unknown         | 5.24e6     | N/A           | 4.07     | 142.6 | N/A         | 1.806656e3         |

Compound name: Eriodictyol  
Regression Equation:  $y = 2901.87645x + 698.14968$  ( $r = 0.99981$ ) (weighting: None)

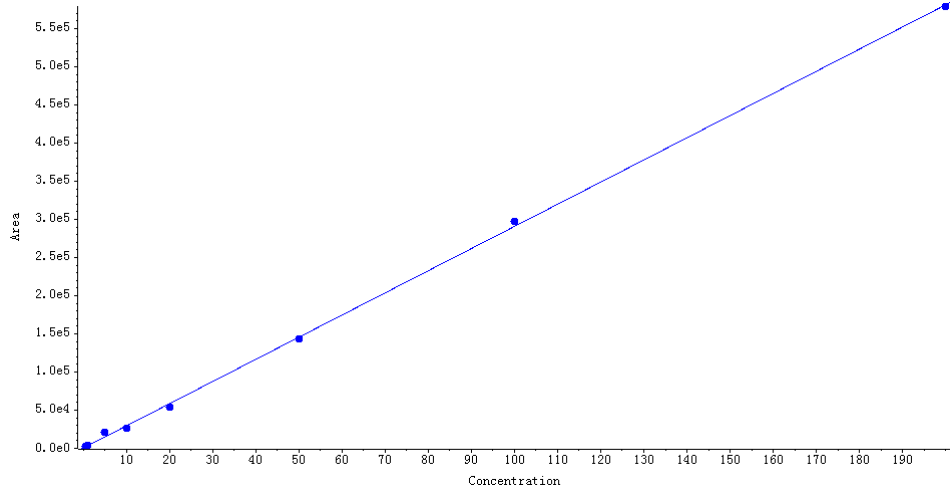

Peak Review

Blank  
Eriodictyol AREA:N/A S/N:N/A

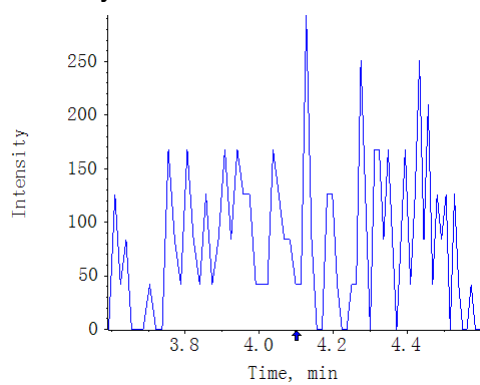

V1.0\_MWMS\_20211021\_1  
Eriodictyol AREA:4.45e5 S/N:221.1

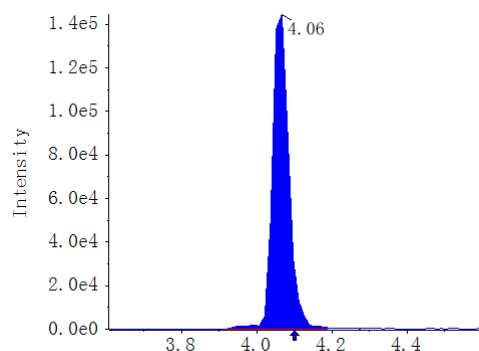

A21233250b\_b  
Eriodictyol AREA:5.64e3 S/N:35.4

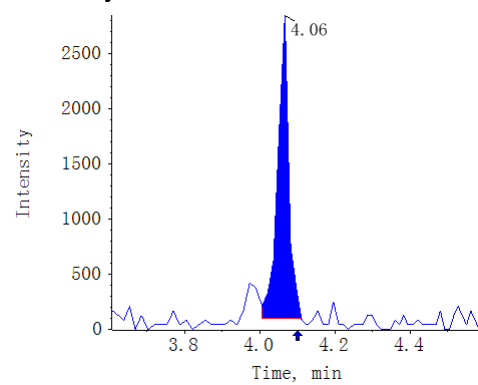

A21233251b\_b  
Eriodictyol AREA:8.49e3 S/N:38.6

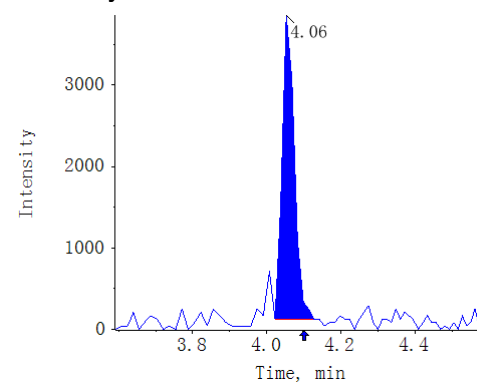

A21233252b\_b  
Eriodictyol AREA:7.29e3 S/N:36.9

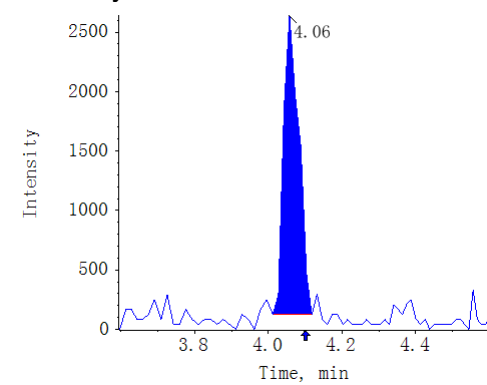

A21233253b\_b  
Eriodictyol AREA:1.38e6 S/N:77.5

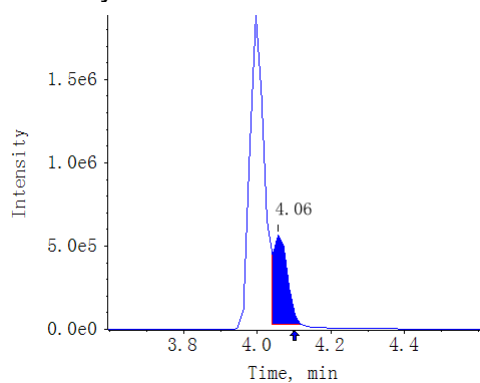

A21233254b\_b  
Eriodictyol AREA:1.48e6 S/N:110.9

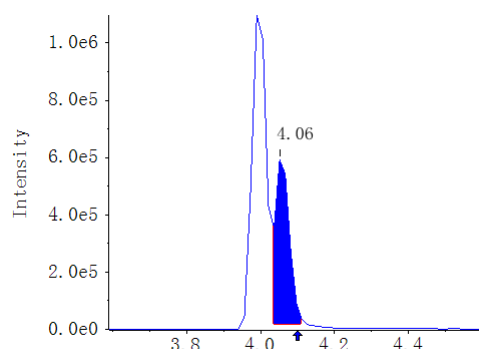

A21233255b\_b  
Eriodictyol AREA:3.05e6 S/N:95.7

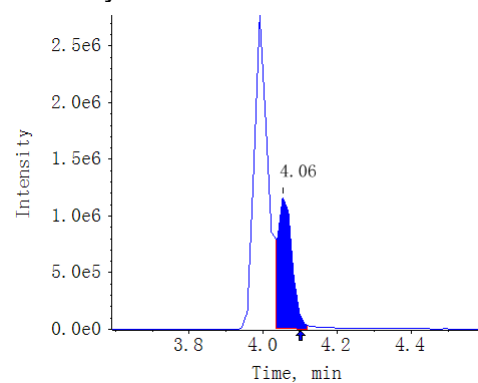

A21233256b\_b  
Eriodictyol AREA:1.87e6 S/N:127.0

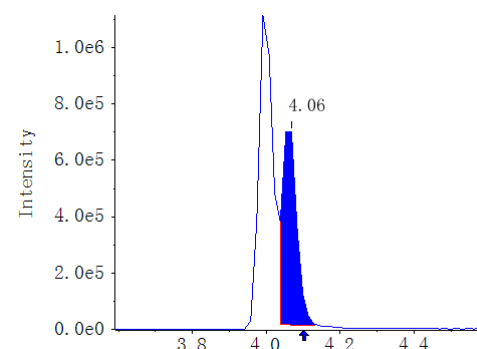

A21233257b\_b  
Eriodictyol AREA:2.90e6 S/N:138.9

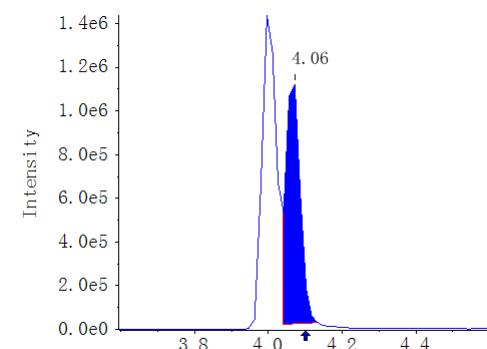

**A21233258b\_b**  
Eriodictyol AREA:9.13e5  
S/N:189.8

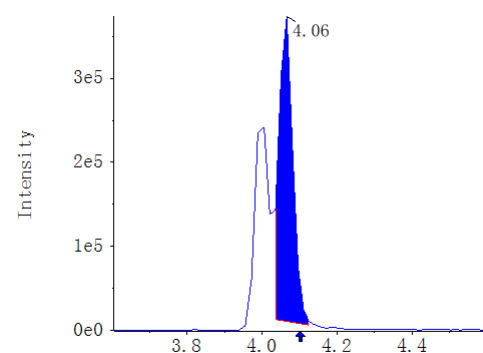

**A21233259b\_b**  
Eriodictyol AREA:4.50e4  
S/N:90.4

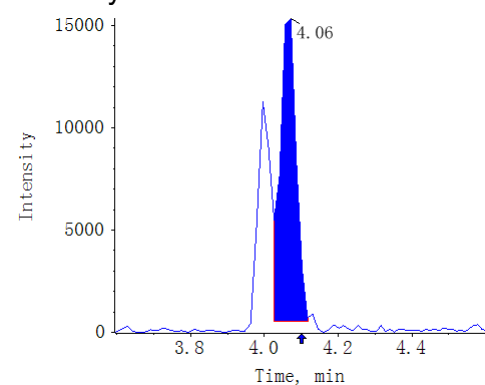

**A21233260b\_b**  
Eriodictyol AREA:4.37e3  
S/N:20.3

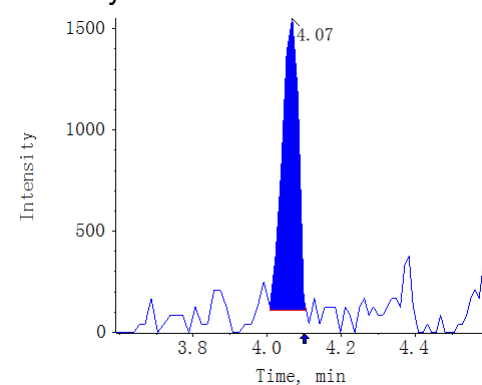

**A21233261b\_b**  
Eriodictyol AREA:4.90e4  
S/N:113.0

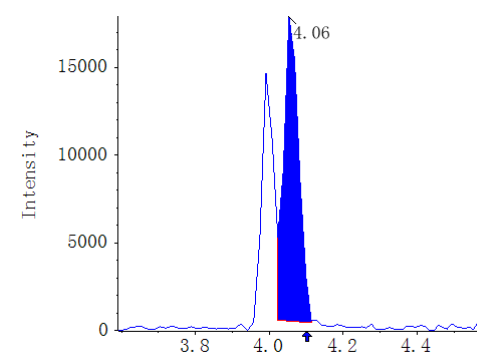

**A21233262b\_b**  
Eriodictyol AREA:5.01e5  
S/N:289.7

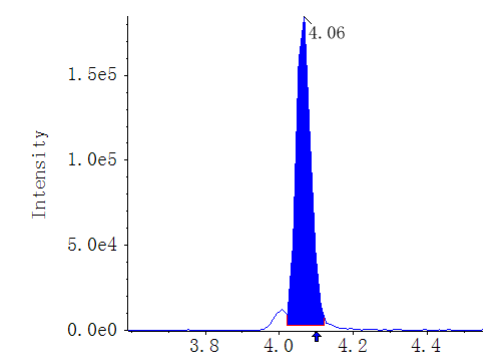

**A21233263b\_b**  
Eriodictyol AREA:4.51e6  
S/N:116.8

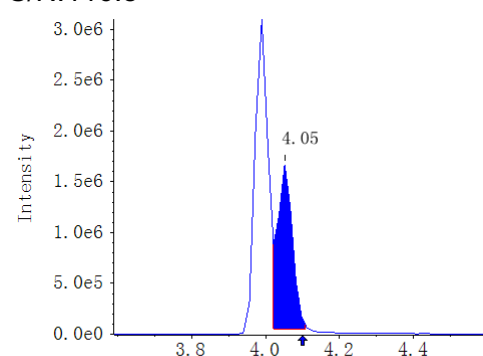

**A21233264b\_b**  
Eriodictyol AREA:3.74e6  
S/N:110.1

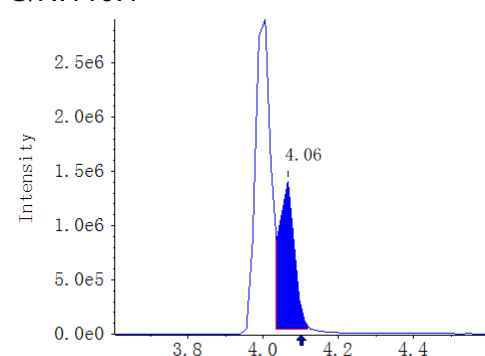

**A21233265b\_b**  
Eriodictyol AREA:5.50e6  
S/N:168.6

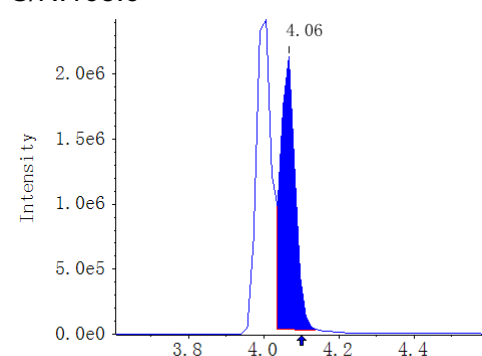

**A21233266b\_b**  
Eriodictyol AREA:3.32e6  
S/N:110.4

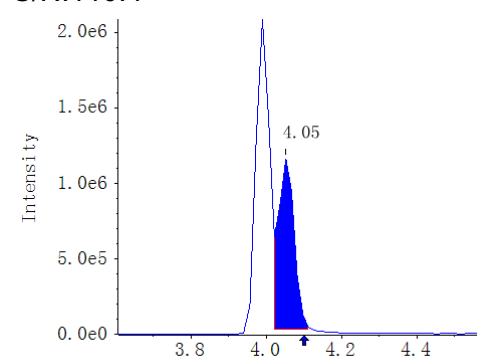

**A21233267b\_b**  
Eriodictyol AREA:5.24e6  
S/N:142.6

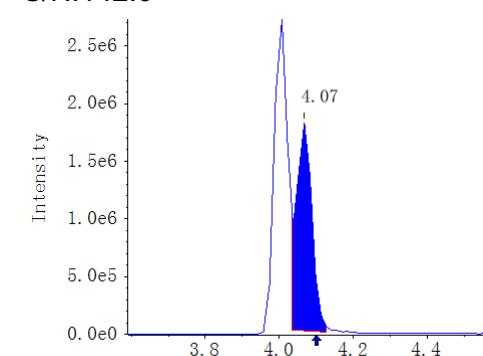

|                    |                                                    |                 |                      |
|--------------------|----------------------------------------------------|-----------------|----------------------|
| Result Table       | MWXS-21-2101D-3_18_WH6500-5_A20-3_V1.0_TY_20211028 | Algorithm Used  | MQ4                  |
| Acquisition Method | Flavonoids_V1.0_WH6500-5_LT_20211025.dam           | Instrument Name | QTRAP 6500+ Low Mass |
| Project            | N/A                                                | Analytes QTY    | 204:109              |

**Compound name: Theaflavin 3,3'-digallate (867.2 / 697.1)**

| Sample Name           | Sample Type     | Area (cps) | Is Area (cps) | RT (min) | S/N   | Target Conc | Calculated Conc.() |
|-----------------------|-----------------|------------|---------------|----------|-------|-------------|--------------------|
| STD_0.5nM             | Standard        | N/A        | N/A           | N/A      | N/A   | 0.5000      | N/A                |
| STD_1nM               | Standard        | N/A        | N/A           | N/A      | N/A   | 1.0000      | N/A                |
| STD_5nM               | Standard        | N/A        | N/A           | N/A      | N/A   | 5.0000      | N/A                |
| STD_10nM              | Standard        | 7.88e2     | N/A           | 3.79     | 10.1  | 10.0000     | 1.248717e1         |
| STD_20nM              | Standard        | 1.26e3     | N/A           | 3.76     | 21.6  | 20.0000     | 1.556886e1         |
| STD_50nM              | Standard        | 5.88e3     | N/A           | 3.78     | 47.6  | 50.0000     | 4.549660e1         |
| STD_100nM             | Standard        | 1.52e4     | N/A           | 3.78     | 67.5  | 100.0000    | 1.061341e2         |
| STD_200nM             | Standard        | 2.98e4     | N/A           | 3.77     | 97.3  | 200.0000    | 2.003133e2         |
| STD_500nM             | Standard        | N/A        | N/A           | N/A      | N/A   | 500.0000    | N/A                |
| STD_1000nM            | Standard        | N/A        | N/A           | N/A      | N/A   | 1000.0000   | N/A                |
| STD_2000nM            | Standard        | N/A        | N/A           | N/A      | N/A   | 2000.0000   | N/A                |
| V1.0_MW_RQC1_20211018 | Quality Control | N/A        | N/A           | N/A      | N/A   | 0.0000      | N/A                |
| Blank                 | Unknown         | N/A        | N/A           | N/A      | N/A   | N/A         | N/A                |
| V1.0_MWMS_20211021_1  | Unknown         | 4.87e4     | N/A           | 3.79     | 158.4 | N/A         | 3.228268e2         |
| MWXS212101D3_R1       | Quality Control | 4.94e4     | N/A           | 3.79     | 128.8 | 0.0000      | 3.279544e2         |
| MWXS212101D3_R2       | Quality Control | 5.14e4     | N/A           | 3.79     | 159.0 | 0.0000      | 3.407413e2         |
| MWXS212101D3_R3       | Quality Control | 5.27e4     | N/A           | 3.79     | 141.1 | 0.0000      | 3.492442e2         |
| A21233250b_b          | Unknown         | N/A        | N/A           | N/A      | N/A   | N/A         | N/A                |
| A21233251b_b          | Unknown         | N/A        | N/A           | N/A      | N/A   | N/A         | N/A                |
| A21233252b_b          | Unknown         | N/A        | N/A           | N/A      | N/A   | N/A         | N/A                |
| A21233253b_b          | Unknown         | -2.61e1    | N/A           | 3.70     | N/A   | N/A         | 7.208013e0         |
| A21233254b_b          | Unknown         | N/A        | N/A           | N/A      | N/A   | N/A         | N/A                |
| A21233255b_b          | Unknown         | N/A        | N/A           | N/A      | N/A   | N/A         | N/A                |
| A21233256b_b          | Unknown         | N/A        | N/A           | N/A      | N/A   | N/A         | N/A                |
| A21233257b_b          | Unknown         | N/A        | N/A           | N/A      | N/A   | N/A         | N/A                |
| A21233258b_b          | Unknown         | N/A        | N/A           | N/A      | N/A   | N/A         | N/A                |
| A21233259b_b          | Unknown         | N/A        | N/A           | N/A      | N/A   | N/A         | N/A                |
| A21233260b_b          | Unknown         | N/A        | N/A           | N/A      | N/A   | N/A         | N/A                |
| A21233261b_b          | Unknown         | N/A        | N/A           | N/A      | N/A   | N/A         | N/A                |
| A21233262b_b          | Unknown         | N/A        | N/A           | N/A      | N/A   | N/A         | N/A                |
| A21233263b_b          | Unknown         | N/A        | N/A           | N/A      | N/A   | N/A         | N/A                |
| A21233264b_b          | Unknown         | N/A        | N/A           | N/A      | N/A   | N/A         | N/A                |
| A21233265b_b          | Unknown         | N/A        | N/A           | N/A      | N/A   | N/A         | N/A                |
| A21233266b_b          | Unknown         | N/A        | N/A           | N/A      | N/A   | N/A         | N/A                |
| A21233267b_b          | Unknown         | N/A        | N/A           | N/A      | N/A   | N/A         | N/A                |

Compound name: Theaflavin 3,3'-digallate  
Regression Equation:  $y = 154.23305 x + -1137.78655$  ( $r = 0.99517$ ) (weighting:  $1 / x$ )

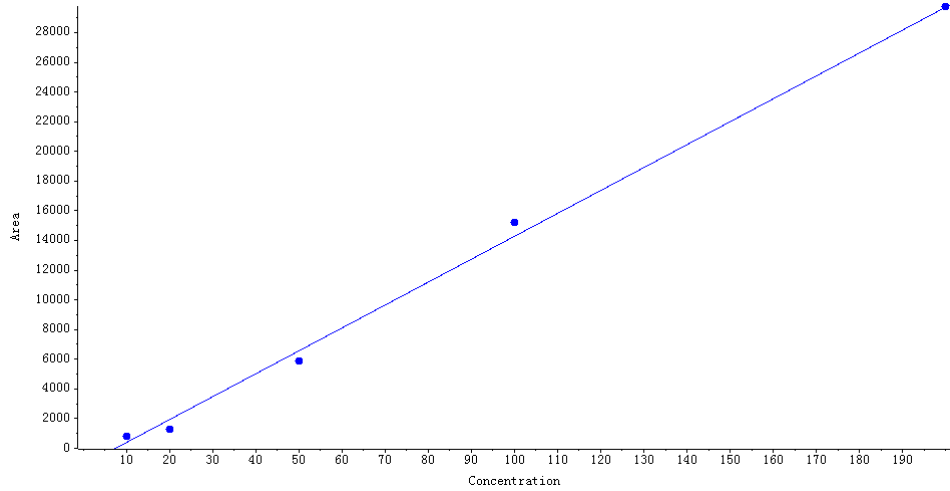

Peak Review

|                           |          |                             |             |                           |          |                           |          |                           |          |
|---------------------------|----------|-----------------------------|-------------|---------------------------|----------|---------------------------|----------|---------------------------|----------|
| <b>Blank</b>              |          | <b>V1.0_MWMS_20211021_1</b> |             | <b>A21233250b_b</b>       |          | <b>A21233251b_b</b>       |          | <b>A21233252b_b</b>       |          |
| Theaflavin 3,3'-digallate | AREA:N/A | Theaflavin 3,3'-digallate   | AREA:4.87e4 | Theaflavin 3,3'-digallate | AREA:N/A | Theaflavin 3,3'-digallate | AREA:N/A | Theaflavin 3,3'-digallate | AREA:N/A |
| S/N:N/A                   |          | S/N:158.4                   |             | S/N:N/A                   |          | S/N:N/A                   |          | S/N:N/A                   |          |

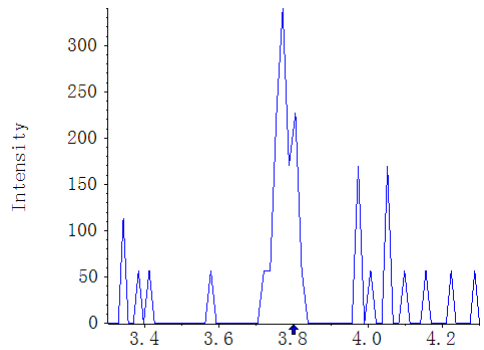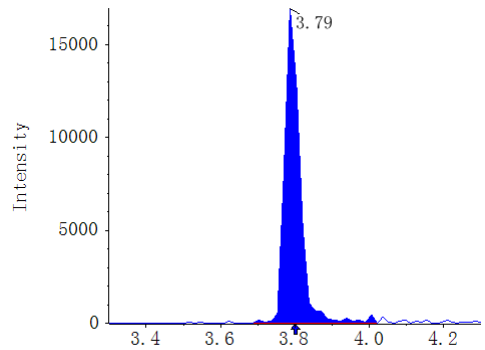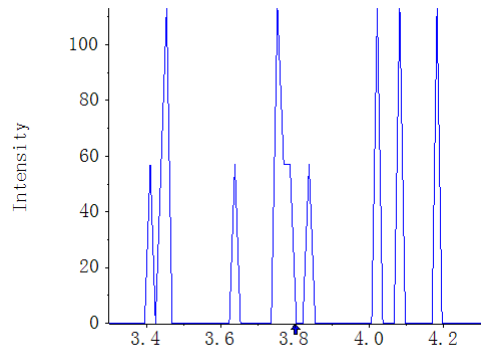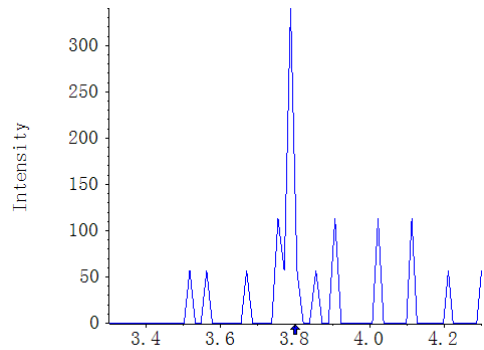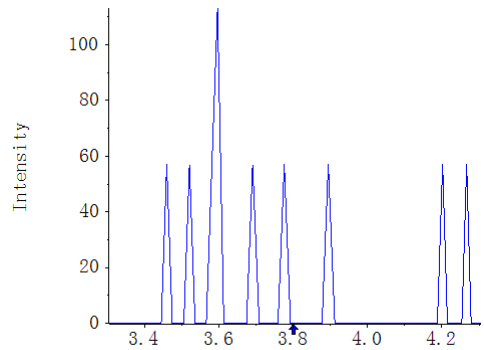

|                           |        |
|---------------------------|--------|
| <b>A21233253b_b</b>       |        |
| Theaflavin 3,3'-digallate | AREA:- |
| S/N:N/A                   |        |

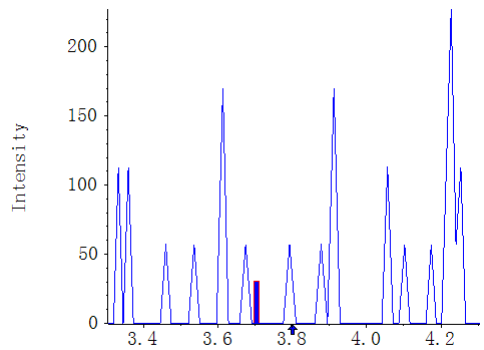

|                           |          |
|---------------------------|----------|
| <b>A21233254b_b</b>       |          |
| Theaflavin 3,3'-digallate | AREA:N/A |
| S/N:N/A                   |          |

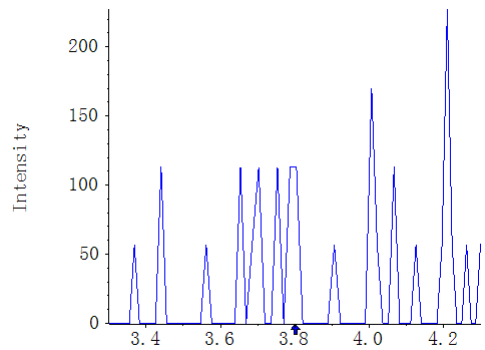

|                           |          |
|---------------------------|----------|
| <b>A21233255b_b</b>       |          |
| Theaflavin 3,3'-digallate | AREA:N/A |
| S/N:N/A                   |          |

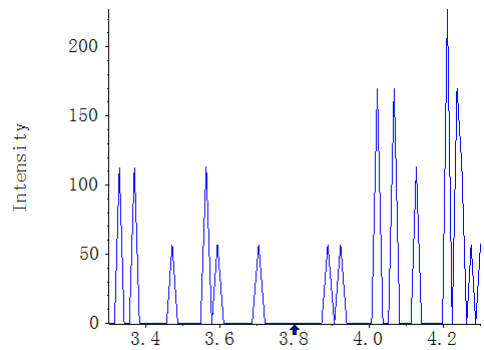

|                           |          |
|---------------------------|----------|
| <b>A21233256b_b</b>       |          |
| Theaflavin 3,3'-digallate | AREA:N/A |
| S/N:N/A                   |          |

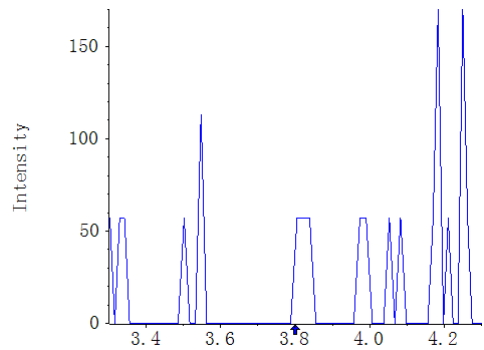

|                           |          |
|---------------------------|----------|
| <b>A21233257b_b</b>       |          |
| Theaflavin 3,3'-digallate | AREA:N/A |
| S/N:N/A                   |          |

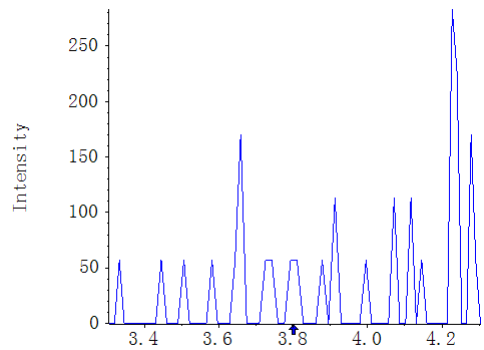

**A21233258b\_b**

Theaflavin 3,3'-digallate AREA:N/A  
S/N:N/A

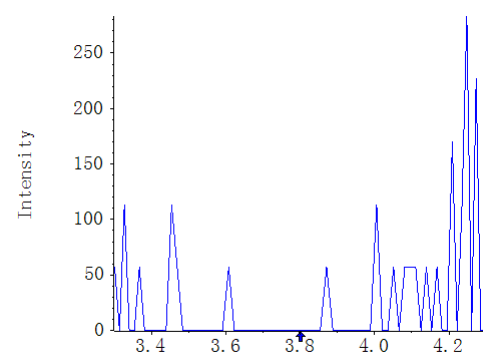

**A21233259b\_b**

Theaflavin 3,3'-digallate AREA:N/A  
S/N:N/A

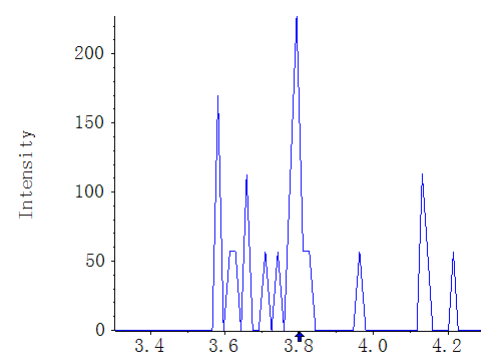

**A21233260b\_b**

Theaflavin 3,3'-digallate AREA:N/A  
S/N:N/A

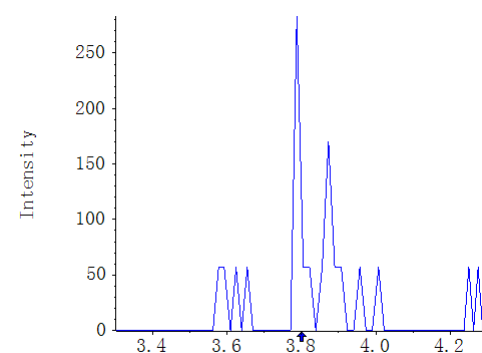

**A21233261b\_b**

Theaflavin 3,3'-digallate AREA:N/A  
S/N:N/A

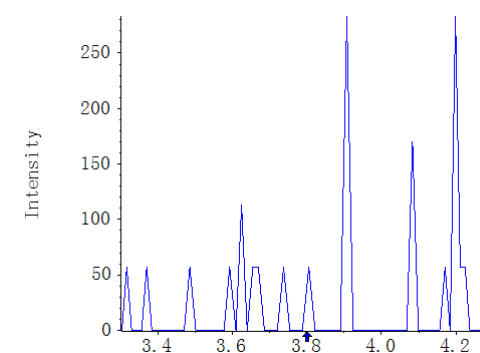

**A21233262b\_b**

Theaflavin 3,3'-digallate AREA:N/A  
S/N:N/A

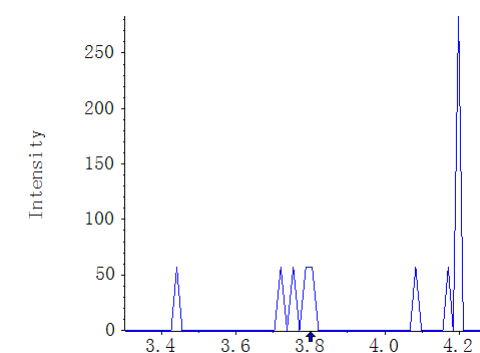

**A21233263b\_b**

Theaflavin 3,3'-digallate AREA:N/A  
S/N:N/A

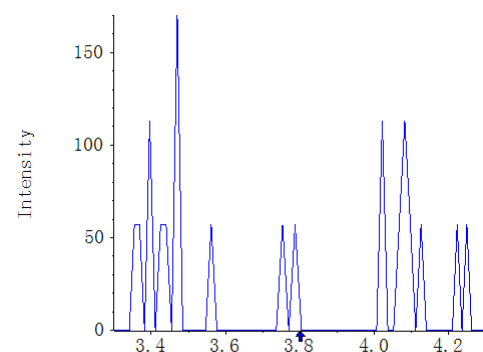

**A21233264b\_b**

Theaflavin 3,3'-digallate AREA:N/A  
S/N:N/A

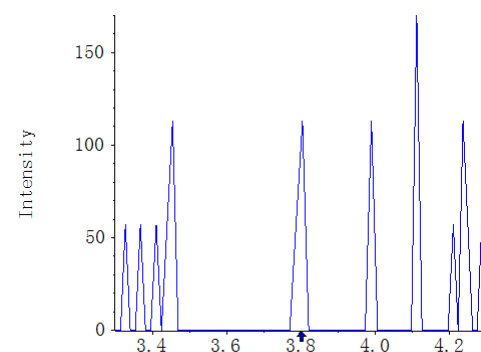

**A21233265b\_b**

Theaflavin 3,3'-digallate AREA:N/A  
S/N:N/A

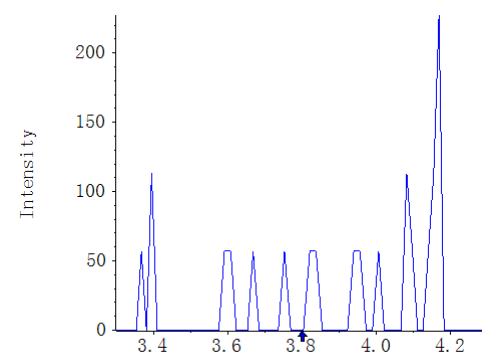

**A21233266b\_b**

Theaflavin 3,3'-digallate AREA:N/A  
S/N:N/A

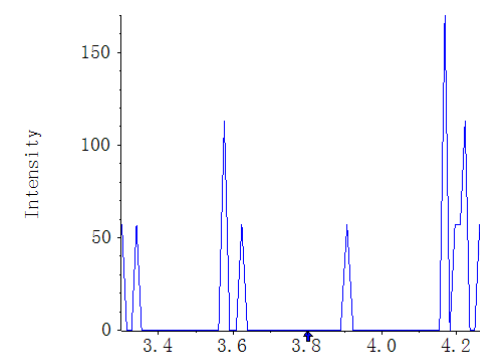

**A21233267b\_b**

Theaflavin 3,3'-digallate AREA:N/A  
S/N:N/A

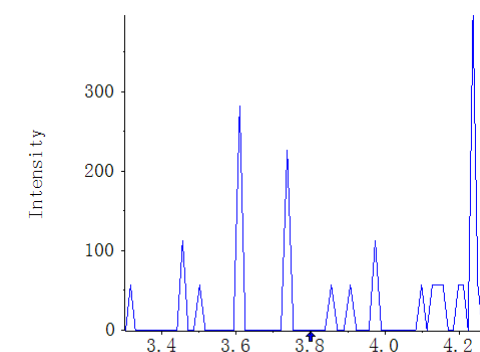

|                    |                                                    |                 |                      |
|--------------------|----------------------------------------------------|-----------------|----------------------|
| Result Table       | MWXS-21-2101D-3_18_WH6500-5_A20-3_V1.0_TY_20211028 | Algorithm Used  | MQ4                  |
| Acquisition Method | Flavonoids_V1.0_WH6500-5_LT_20211025.dam           | Instrument Name | QTRAP 6500+ Low Mass |
| Project            | N/A                                                | Analytes QTY    | 204:110              |

**Compound name: 6,2'-Dihydroxyflavone (253.1 / 117.0)**

| Sample Name           | Sample Type     | Area (cps) | Is Area (cps) | RT (min) | S/N   | Target Conc | Calculated Conc.() |
|-----------------------|-----------------|------------|---------------|----------|-------|-------------|--------------------|
| STD_0.5nM             | Standard        | 4.86e3     | N/A           | 4.69     | 5.8   | 0.5000      | 3.480938e-1        |
| STD_1nM               | Standard        | 1.10e4     | N/A           | 4.68     | 11.4  | 1.0000      | 1.077177e0         |
| STD_5nM               | Standard        | 5.38e4     | N/A           | 4.68     | 50.5  | 5.0000      | 6.197314e0         |
| STD_10nM              | Standard        | 8.45e4     | N/A           | 4.68     | 62.8  | 10.0000     | 9.874910e0         |
| STD_20nM              | Standard        | 1.67e5     | N/A           | 4.68     | 85.8  | 20.0000     | 1.971358e1         |
| STD_50nM              | Standard        | 4.37e5     | N/A           | 4.69     | 176.7 | 50.0000     | 5.200193e1         |
| STD_100nM             | Standard        | 8.17e5     | N/A           | 4.69     | 266.4 | 100.0000    | 9.750578e1         |
| STD_200nM             | Standard        | 1.67e6     | N/A           | 4.68     | 267.0 | 200.0000    | 1.997812e2         |
| STD_500nM             | Standard        | N/A        | N/A           | N/A      | N/A   | 500.0000    | N/A                |
| STD_1000nM            | Standard        | N/A        | N/A           | N/A      | N/A   | 1000.0000   | N/A                |
| STD_2000nM            | Standard        | N/A        | N/A           | N/A      | N/A   | 2000.0000   | N/A                |
| V1.0_MW_RQC1_20211018 | Quality Control | N/A        | N/A           | N/A      | N/A   | 0.0000      | N/A                |
| Blank                 | Unknown         | N/A        | N/A           | N/A      | N/A   | N/A         | N/A                |
| V1.0_MWMS_20211021_1  | Unknown         | 1.35e6     | N/A           | 4.70     | 338.3 | N/A         | 1.607538e2         |
| MWXS212101D3_R1       | Quality Control | 1.30e6     | N/A           | 4.69     | 311.2 | 0.0000      | 1.550935e2         |
| MWXS212101D3_R2       | Quality Control | 1.30e6     | N/A           | 4.70     | 252.1 | 0.0000      | 1.552890e2         |
| MWXS212101D3_R3       | Quality Control | 1.34e6     | N/A           | 4.69     | 257.0 | 0.0000      | 1.599191e2         |
| A21233250b_b          | Unknown         | N/A        | N/A           | N/A      | N/A   | N/A         | N/A                |
| A21233251b_b          | Unknown         | N/A        | N/A           | N/A      | N/A   | N/A         | N/A                |
| A21233252b_b          | Unknown         | N/A        | N/A           | N/A      | N/A   | N/A         | N/A                |
| A21233253b_b          | Unknown         | 2.61e4     | N/A           | 4.71     | 30.7  | N/A         | 2.886807e0         |
| A21233254b_b          | Unknown         | 2.56e4     | N/A           | 4.70     | 33.4  | N/A         | 2.828131e0         |
| A21233255b_b          | Unknown         | 2.81e4     | N/A           | 4.70     | 36.8  | N/A         | 3.127482e0         |
| A21233256b_b          | Unknown         | 1.38e4     | N/A           | 4.71     | 25.3  | N/A         | 1.414361e0         |
| A21233257b_b          | Unknown         | 1.53e4     | N/A           | 4.71     | 21.3  | N/A         | 1.600322e0         |
| A21233258b_b          | Unknown         | 5.52e3     | N/A           | 4.71     | 11.3  | N/A         | 4.277561e-1        |
| A21233259b_b          | Unknown         | N/A        | N/A           | N/A      | N/A   | N/A         | N/A                |
| A21233260b_b          | Unknown         | N/A        | N/A           | N/A      | N/A   | N/A         | N/A                |
| A21233261b_b          | Unknown         | N/A        | N/A           | N/A      | N/A   | N/A         | N/A                |
| A21233262b_b          | Unknown         | N/A        | N/A           | N/A      | N/A   | N/A         | N/A                |
| A21233263b_b          | Unknown         | 2.85e4     | N/A           | 4.70     | 29.7  | N/A         | 3.173571e0         |
| A21233264b_b          | Unknown         | 3.30e4     | N/A           | 4.71     | 43.4  | N/A         | 3.718846e0         |
| A21233265b_b          | Unknown         | 2.27e4     | N/A           | 4.70     | 31.0  | N/A         | 2.484993e0         |
| A21233266b_b          | Unknown         | 2.41e4     | N/A           | 4.70     | 29.2  | N/A         | 2.644343e0         |
| A21233267b_b          | Unknown         | 1.70e4     | N/A           | 4.71     | 23.8  | N/A         | 1.802653e0         |

Compound name: 6,2'-Dihydroxyflavone

Regression Equation:  $y = 8363.60692x + 1943.87321$  ( $r = 0.99934$ ) (weighting:  $1/x$ )

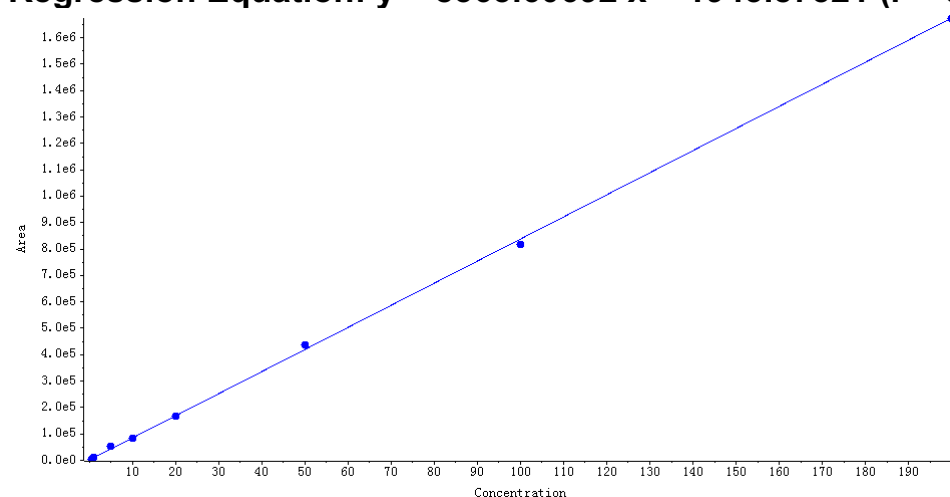

### Peak Review

#### Blank

6,2'-Dihydroxyflavone AREA:N/A  
S/N:N/A

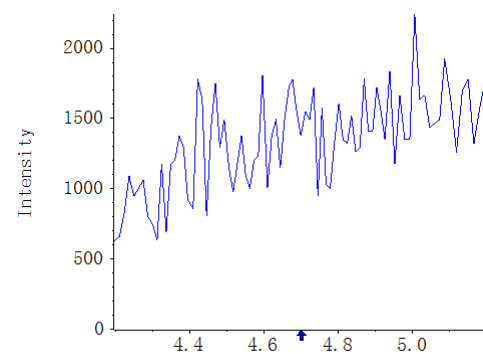

#### V1.0\_MWMS\_20211021\_1

6,2'-Dihydroxyflavone AREA:1.35e6  
S/N:338.3

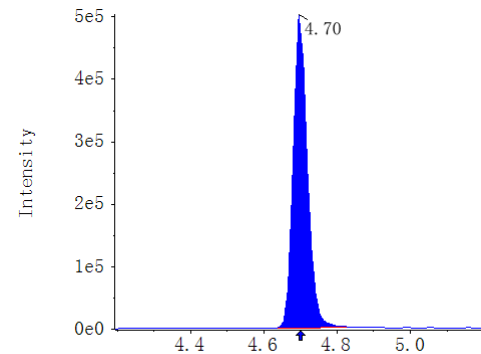

#### A21233250b\_b

6,2'-Dihydroxyflavone AREA:N/A  
S/N:N/A

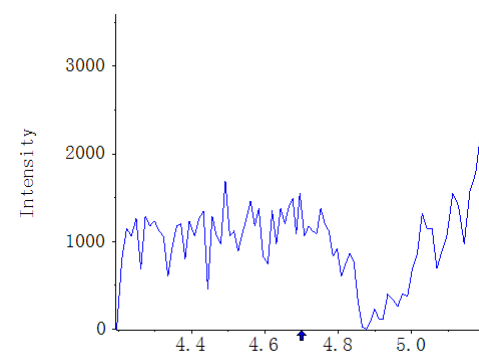

#### A21233251b\_b

6,2'-Dihydroxyflavone AREA:N/A  
S/N:N/A

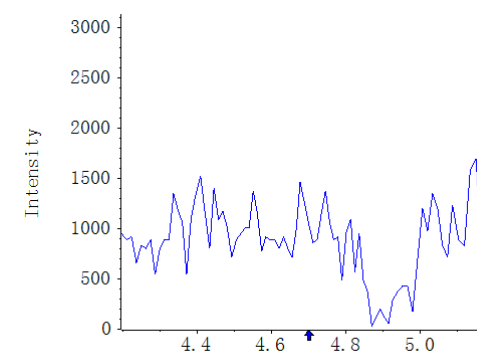

#### A21233252b\_b

6,2'-Dihydroxyflavone AREA:N/A  
S/N:N/A

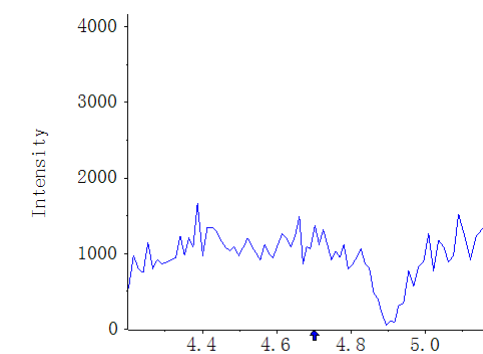

#### A21233253b\_b

6,2'-Dihydroxyflavone AREA:2.61e4  
S/N:30.7

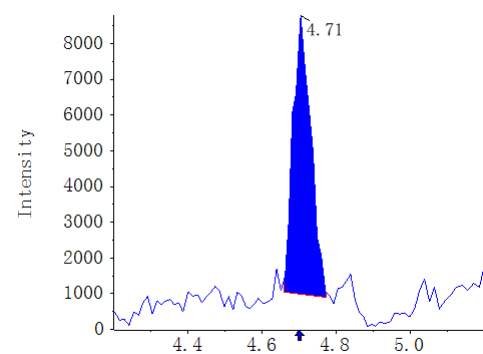

#### A21233254b\_b

6,2'-Dihydroxyflavone AREA:2.56e4  
S/N:33.4

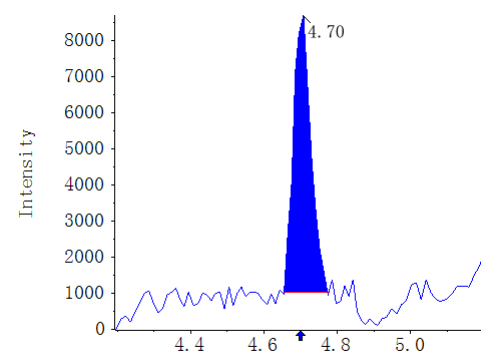

#### A21233255b\_b

6,2'-Dihydroxyflavone AREA:2.81e4  
S/N:36.8

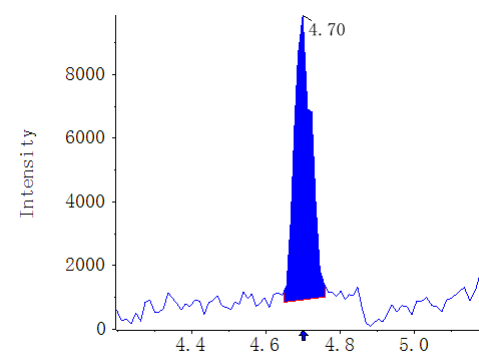

#### A21233256b\_b

6,2'-Dihydroxyflavone AREA:1.38e4  
S/N:25.3

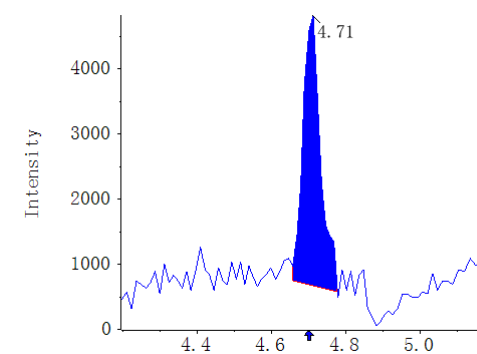

#### A21233257b\_b

6,2'-Dihydroxyflavone AREA:1.53e4  
S/N:21.3

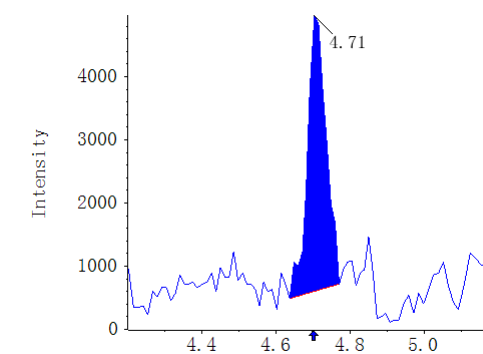

**A21233258b\_b**

6,2'-Dihydroxyflavone AREA:5.52e3  
S/N:11.3

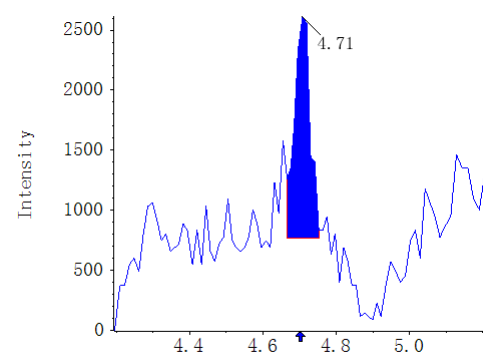

**A21233259b\_b**

6,2'-Dihydroxyflavone AREA:N/A  
S/N:N/A

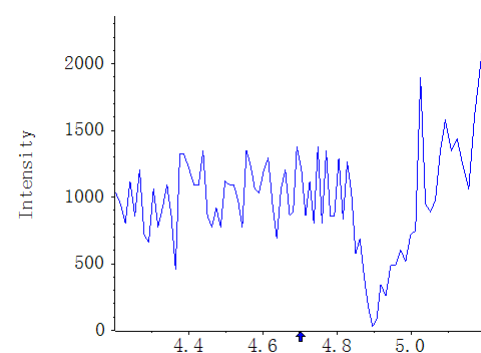

**A21233260b\_b**

6,2'-Dihydroxyflavone AREA:N/A  
S/N:N/A

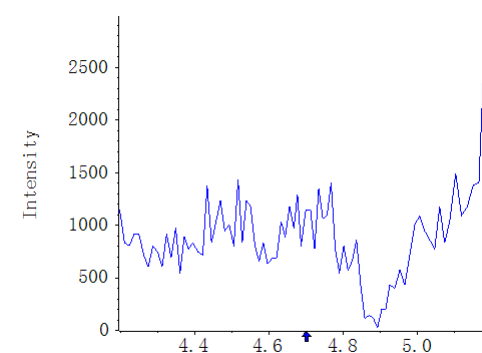

**A21233261b\_b**

6,2'-Dihydroxyflavone AREA:N/A  
S/N:N/A

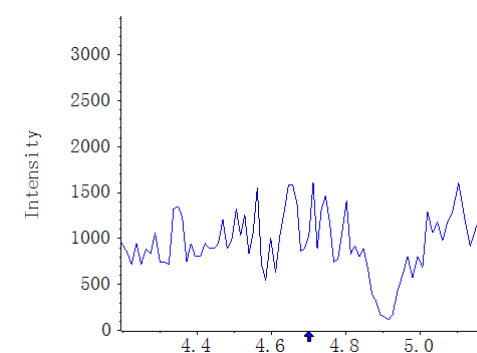

**A21233262b\_b**

6,2'-Dihydroxyflavone AREA:N/A  
S/N:N/A

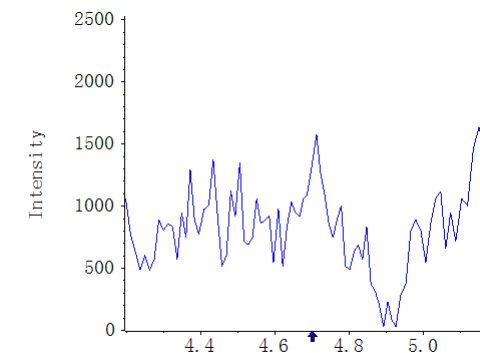

**A21233263b\_b**

6,2'-Dihydroxyflavone AREA:2.85e4  
S/N:29.7

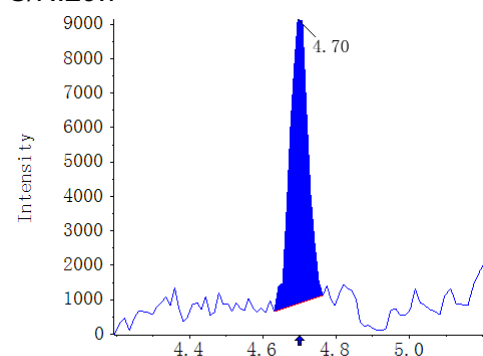

**A21233264b\_b**

6,2'-Dihydroxyflavone AREA:3.30e4  
S/N:43.4

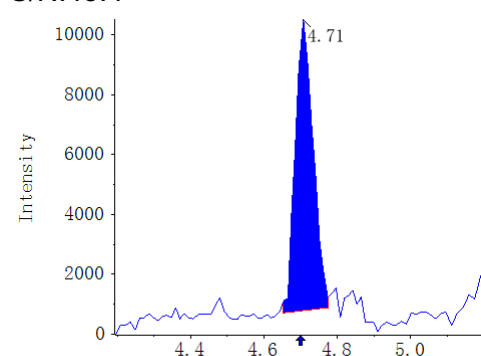

**A21233265b\_b**

6,2'-Dihydroxyflavone AREA:2.27e4  
S/N:31.0

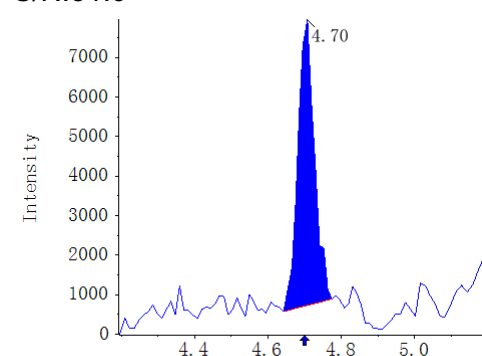

**A21233266b\_b**

6,2'-Dihydroxyflavone AREA:2.41e4  
S/N:29.2

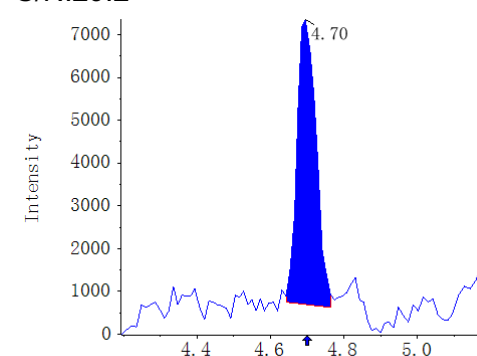

**A21233267b\_b**

6,2'-Dihydroxyflavone AREA:1.70e4  
S/N:23.8

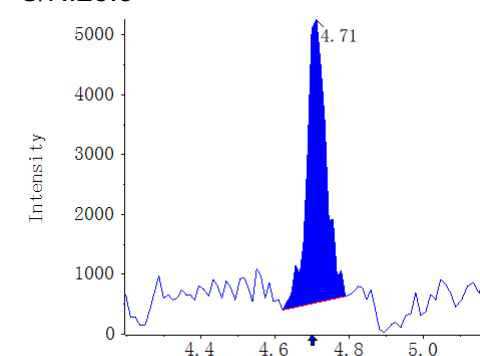

|                    |                                                    |                 |                      |
|--------------------|----------------------------------------------------|-----------------|----------------------|
| Result Table       | MWXS-21-2101D-3_18_WH6500-5_A20-3_V1.0_TY_20211028 | Algorithm Used  | MQ4                  |
| Acquisition Method | Flavonoids_V1.0_WH6500-5_LT_20211025.dam           | Instrument Name | QTRAP 6500+ Low Mass |
| Project            | N/A                                                | Analytes QTY    | 204:112              |

**Compound name: Baimaside (625.1 / 300.0)**

| Sample Name           | Sample Type     | Area (cps) | Is Area (cps) | RT (min) | S/N   | Target Conc | Calculated Conc.() |
|-----------------------|-----------------|------------|---------------|----------|-------|-------------|--------------------|
| STD_0.5nM             | Standard        | 3.06e3     | N/A           | 2.41     | 19.4  | 0.5000      | 3.314550e-1        |
| STD_1nM               | Standard        | 7.85e3     | N/A           | 2.40     | 29.1  | 1.0000      | 9.336469e-1        |
| STD_5nM               | Standard        | 5.92e4     | N/A           | 2.40     | 196.7 | 5.0000      | 7.375877e0         |
| STD_10nM              | Standard        | 7.57e4     | N/A           | 2.40     | 242.4 | 10.0000     | 9.458774e0         |
| STD_20nM              | Standard        | 1.53e5     | N/A           | 2.40     | 245.7 | 20.0000     | 1.922136e1         |
| STD_50nM              | Standard        | 4.15e5     | N/A           | 2.40     | 223.6 | 50.0000     | 5.204684e1         |
| STD_100nM             | Standard        | 7.88e5     | N/A           | 2.41     | 257.7 | 100.0000    | 9.894509e1         |
| STD_200nM             | Standard        | 1.58e6     | N/A           | 2.40     | 272.9 | 200.0000    | 1.981870e2         |
| STD_500nM             | Standard        | N/A        | N/A           | N/A      | N/A   | 500.0000    | N/A                |
| STD_1000nM            | Standard        | N/A        | N/A           | N/A      | N/A   | 1000.0000   | N/A                |
| STD_2000nM            | Standard        | N/A        | N/A           | N/A      | N/A   | 2000.0000   | N/A                |
| V1.0_MW_RQC1_20211018 | Quality Control | N/A        | N/A           | N/A      | N/A   | 0.0000      | N/A                |
| Blank                 | Unknown         | N/A        | N/A           | N/A      | N/A   | N/A         | N/A                |
| V1.0_MWMS_20211021_1  | Unknown         | 1.35e6     | N/A           | 2.41     | 270.4 | N/A         | 1.699094e2         |
| MWXS212101D3_R1       | Quality Control | 1.43e6     | N/A           | 2.40     | 295.0 | 0.0000      | 1.791701e2         |
| MWXS212101D3_R2       | Quality Control | 1.41e6     | N/A           | 2.41     | 292.8 | 0.0000      | 1.775556e2         |
| MWXS212101D3_R3       | Quality Control | 1.37e6     | N/A           | 2.40     | 289.8 | 0.0000      | 1.723093e2         |
| A21233250b_b          | Unknown         | 8.97e5     | N/A           | 2.40     | 217.6 | N/A         | 1.125780e2         |
| A21233251b_b          | Unknown         | 6.27e3     | N/A           | 2.40     | 10.6  | N/A         | 7.344108e-1        |
| A21233252b_b          | Unknown         | 4.81e3     | N/A           | 2.40     | 9.7   | N/A         | 5.509163e-1        |
| A21233253b_b          | Unknown         | 5.39e5     | N/A           | 2.41     | 168.1 | N/A         | 6.765729e1         |
| A21233254b_b          | Unknown         | 2.15e5     | N/A           | 2.40     | 155.4 | N/A         | 2.698091e1         |
| A21233255b_b          | Unknown         | 2.35e3     | N/A           | 2.41     | 4.9   | N/A         | 2.426046e-1        |
| A21233256b_b          | Unknown         | 3.66e3     | N/A           | 2.40     | 4.4   | N/A         | 4.065616e-1        |
| A21233257b_b          | Unknown         | 4.03e3     | N/A           | 2.40     | 6.0   | N/A         | 4.534945e-1        |
| A21233258b_b          | Unknown         | 2.38e3     | N/A           | 2.40     | 3.2   | N/A         | 2.456955e-1        |
| A21233259b_b          | Unknown         | 9.46e4     | N/A           | 2.41     | 94.6  | N/A         | 1.182572e1         |
| A21233260b_b          | Unknown         | 1.13e4     | N/A           | 2.39     | 21.9  | N/A         | 1.370307e0         |
| A21233261b_b          | Unknown         | 6.88e4     | N/A           | 2.41     | 71.7  | N/A         | 8.582343e0         |
| A21233262b_b          | Unknown         | 9.22e4     | N/A           | 2.41     | 111.5 | N/A         | 1.153048e1         |
| A21233263b_b          | Unknown         | 1.45e4     | N/A           | 2.40     | 18.6  | N/A         | 1.772319e0         |
| A21233264b_b          | Unknown         | 4.87e3     | N/A           | 2.40     | 8.8   | N/A         | 5.593477e-1        |
| A21233265b_b          | Unknown         | 2.41e3     | N/A           | 2.41     | 6.0   | N/A         | 2.502649e-1        |
| A21233266b_b          | Unknown         | 3.01e4     | N/A           | 2.40     | 39.0  | N/A         | 3.723679e0         |
| A21233267b_b          | Unknown         | 2.59e3     | N/A           | 2.40     | 4.6   | N/A         | 2.732563e-1        |

Compound name: Baimaside  
Regression Equation:  $y = 7962.77841x + 418.84858$  ( $r = 0.99815$ ) (weighting:  $1/x$ )

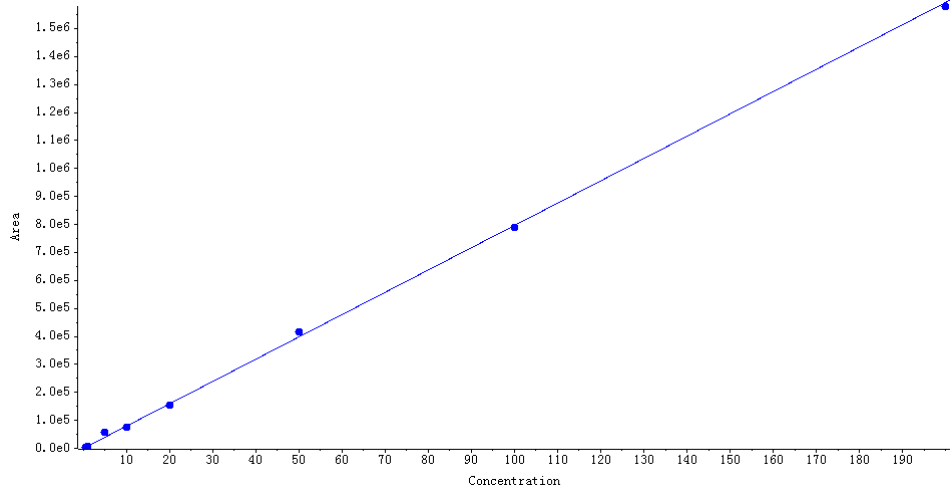

Peak Review

Blank  
Baimaside AREA:N/A S/N:N/A

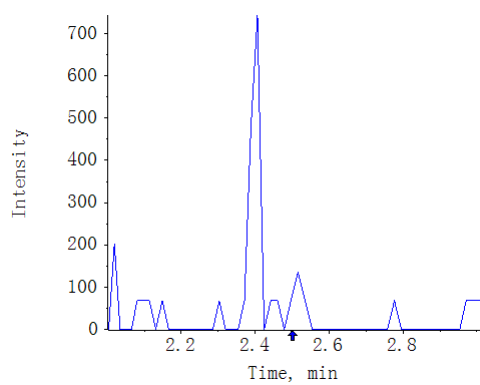

V1.0\_MWMS\_20211021\_1  
Baimaside AREA:1.35e6 S/N:270.4

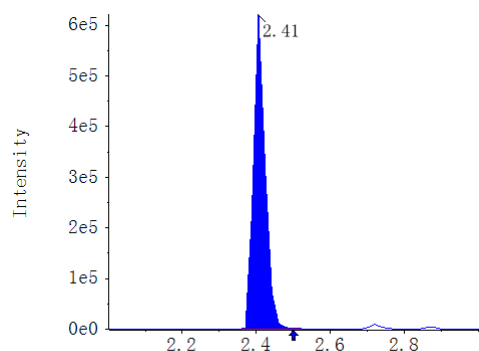

A21233250b\_b  
Baimaside AREA:8.97e5 S/N:217.6

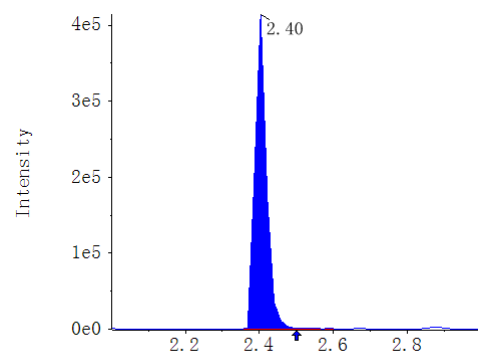

A21233251b\_b  
Baimaside AREA:6.27e3 S/N:10.6

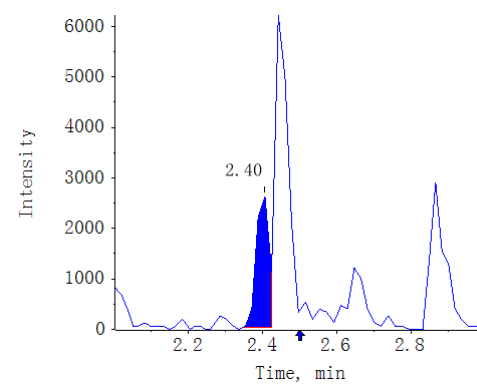

A21233252b\_b  
Baimaside AREA:4.81e3 S/N:9.7

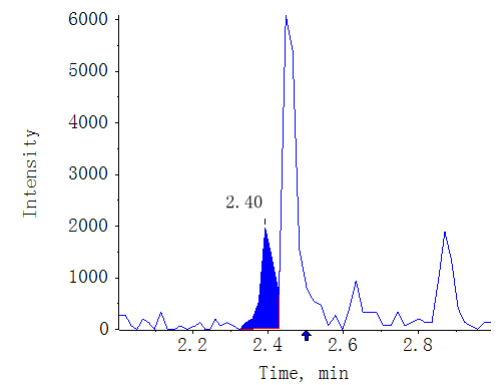

A21233253b\_b  
Baimaside AREA:5.39e5 S/N:168.1

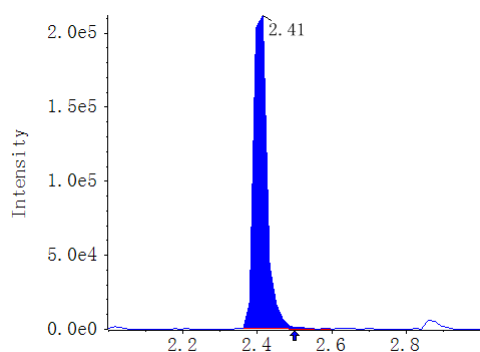

A21233254b\_b  
Baimaside AREA:2.15e5 S/N:155.4

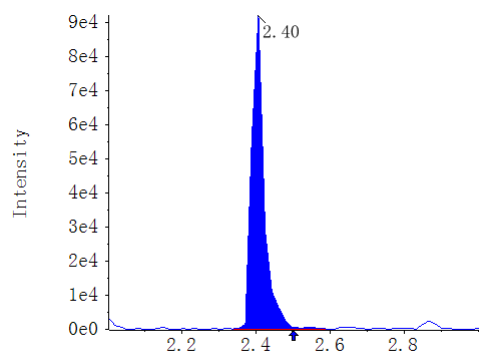

A21233255b\_b  
Baimaside AREA:2.35e3 S/N:4.9

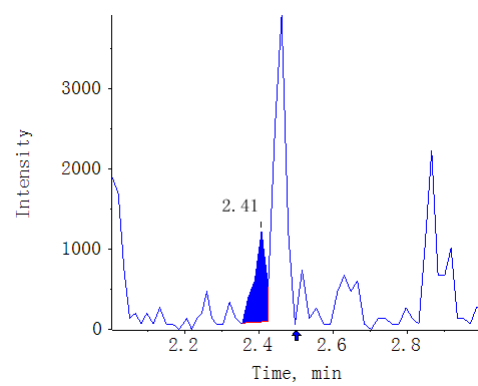

A21233256b\_b  
Baimaside AREA:3.66e3 S/N:4.4

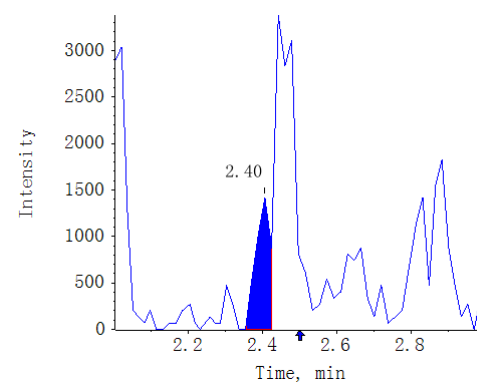

A21233257b\_b  
Baimaside AREA:4.03e3 S/N:6.0

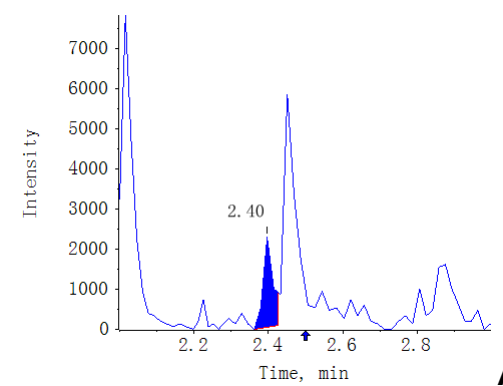

A

**A21233258b\_b**

Baimaside AREA:2.38e3 S/N:3.2

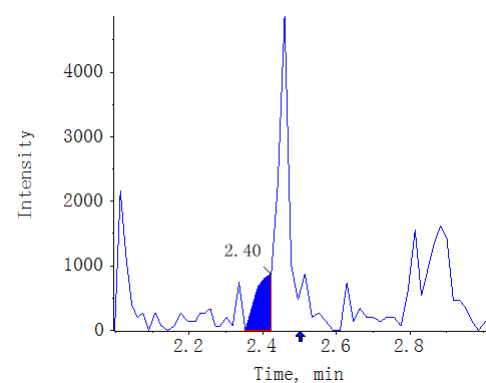

**A21233259b\_b**

Baimaside AREA:9.46e4 S/N:94.6

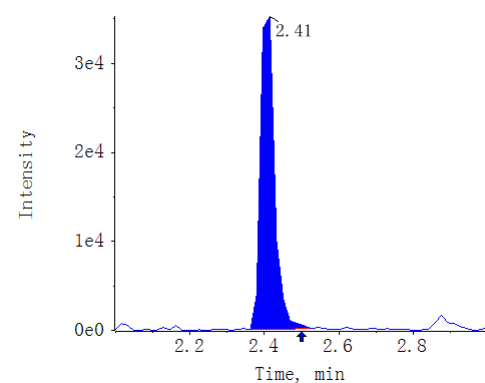

**A21233260b\_b**

Baimaside AREA:1.13e4 S/N:21.9

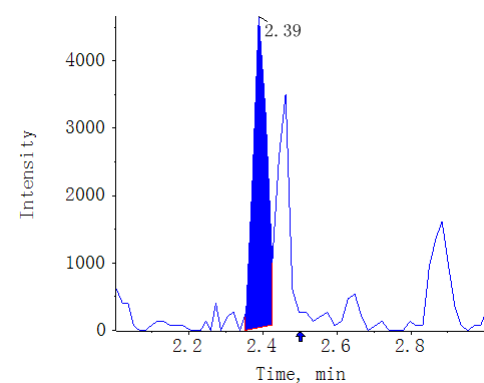

**A21233261b\_b**

Baimaside AREA:6.88e4 S/N:71.7

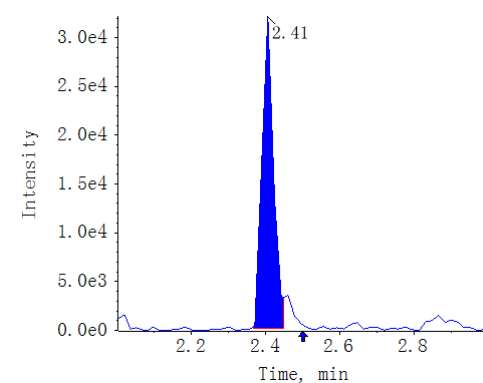

**A21233262b\_b**

Baimaside AREA:9.22e4 S/N:111.5

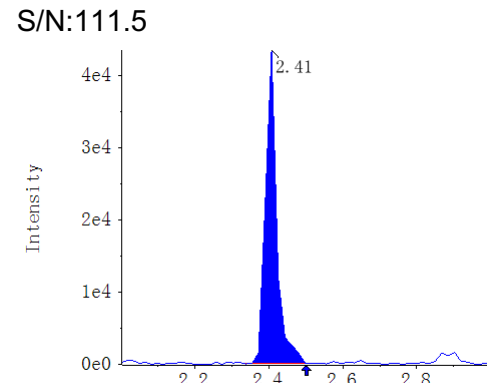

**A21233263b\_b**

Baimaside AREA:1.45e4 S/N:18.6

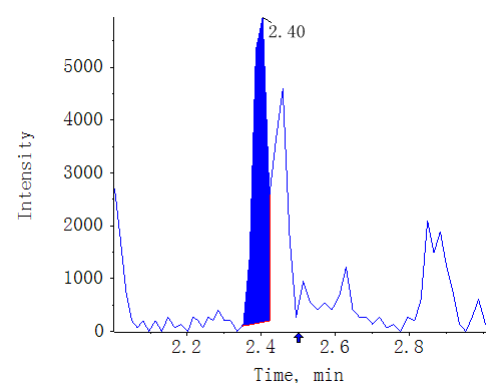

**A21233264b\_b**

Baimaside AREA:4.87e3 S/N:8.8

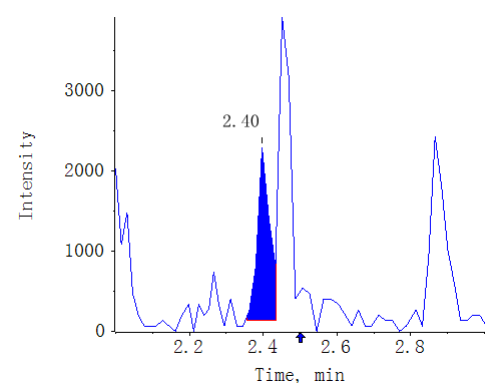

**A21233265b\_b**

Baimaside AREA:2.41e3 S/N:6.0

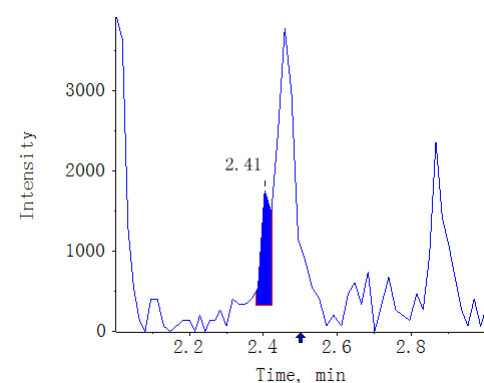

**A21233266b\_b**

Baimaside AREA:3.01e4 S/N:39.0

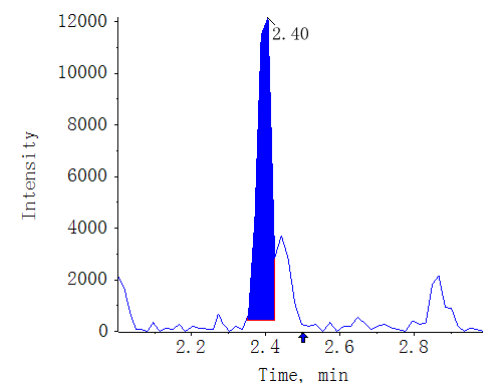

**A21233267b\_b**

Baimaside AREA:2.59e3 S/N:4.6

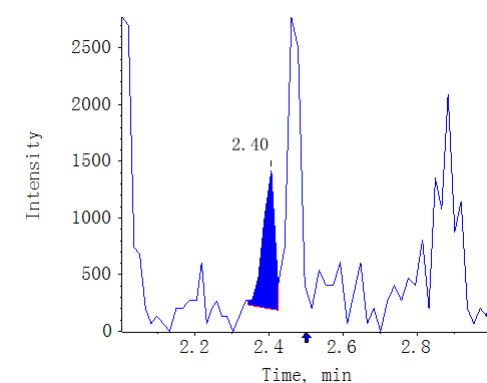

|                    |                                                    |                 |                      |
|--------------------|----------------------------------------------------|-----------------|----------------------|
| Result Table       | MWXS-21-2101D-3_18_WH6500-5_A20-3_V1.0_TY_20211028 | Algorithm Used  | MQ4                  |
| Acquisition Method | Flavonoids_V1.0_WH6500-5_LT_20211025.dam           | Instrument Name | QTRAP 6500+ Low Mass |
| Project            | N/A                                                | Analytes QTY    | 204:113              |

**Compound name: Dihydrokaempferol (287.1 / 125.0)**

| Sample Name           | Sample Type     | Area (cps) | Is Area (cps) | RT (min) | S/N   | Target Conc | Calculated Conc.() |
|-----------------------|-----------------|------------|---------------|----------|-------|-------------|--------------------|
| STD_0.5nM             | Standard        | 2.49e3     | N/A           | 3.53     | 5.6   | 0.5000      | 3.386008e-1        |
| STD_1nM               | Standard        | 6.35e3     | N/A           | 3.52     | 20.1  | 1.0000      | 8.328315e-1        |
| STD_5nM               | Standard        | 5.80e4     | N/A           | 3.53     | 93.0  | 5.0000      | 7.456397e0         |
| STD_10nM              | Standard        | 7.52e4     | N/A           | 3.53     | 105.8 | 10.0000     | 9.661809e0         |
| STD_20nM              | Standard        | 1.60e5     | N/A           | 3.52     | 158.1 | 20.0000     | 2.053584e1         |
| STD_50nM              | Standard        | 4.00e5     | N/A           | 3.53     | 151.6 | 50.0000     | 5.125116e1         |
| STD_100nM             | Standard        | 7.78e5     | N/A           | 3.53     | 202.6 | 100.0000    | 9.971496e1         |
| STD_200nM             | Standard        | 1.53e6     | N/A           | 3.52     | 207.8 | 200.0000    | 1.967084e2         |
| STD_500nM             | Standard        | N/A        | N/A           | N/A      | N/A   | 500.0000    | N/A                |
| STD_1000nM            | Standard        | N/A        | N/A           | N/A      | N/A   | 1000.0000   | N/A                |
| STD_2000nM            | Standard        | N/A        | N/A           | N/A      | N/A   | 2000.0000   | N/A                |
| V1.0_MW_RQC1_20211018 | Quality Control | 5.34e3     | N/A           | 3.52     | 7.0   | 0.0000      | 7.037668e-1        |
| Blank                 | Unknown         | N/A        | N/A           | N/A      | N/A   | N/A         | N/A                |
| V1.0_MWMS_20211021_1  | Unknown         | 1.17e6     | N/A           | 3.54     | 233.4 | N/A         | 1.497839e2         |
| MWXS212101D3_R1       | Quality Control | 1.20e6     | N/A           | 3.53     | 213.9 | 0.0000      | 1.536434e2         |
| MWXS212101D3_R2       | Quality Control | 1.24e6     | N/A           | 3.54     | 206.2 | 0.0000      | 1.588441e2         |
| MWXS212101D3_R3       | Quality Control | 1.22e6     | N/A           | 3.54     | 203.6 | 0.0000      | 1.565350e2         |
| A21233250b_b          | Unknown         | 4.95e3     | N/A           | 3.54     | 9.2   | N/A         | 6.533179e-1        |
| A21233251b_b          | Unknown         | 3.54e3     | N/A           | 3.55     | 4.2   | N/A         | 4.734929e-1        |
| A21233252b_b          | Unknown         | 4.49e3     | N/A           | 3.53     | 6.2   | N/A         | 5.953943e-1        |
| A21233253b_b          | Unknown         | 5.76e5     | N/A           | 3.53     | 41.5  | N/A         | 7.390473e1         |
| A21233254b_b          | Unknown         | 6.83e5     | N/A           | 3.53     | 68.4  | N/A         | 8.762392e1         |
| A21233255b_b          | Unknown         | 7.91e5     | N/A           | 3.53     | 49.4  | N/A         | 1.014510e2         |
| A21233256b_b          | Unknown         | 1.99e5     | N/A           | 3.54     | 23.9  | N/A         | 2.557938e1         |
| A21233257b_b          | Unknown         | 2.62e5     | N/A           | 3.54     | 23.3  | N/A         | 3.361223e1         |
| A21233258b_b          | Unknown         | 1.44e5     | N/A           | 3.54     | 36.1  | N/A         | 1.851658e1         |
| A21233259b_b          | Unknown         | 7.31e3     | N/A           | 3.55     | 15.8  | N/A         | 9.568670e-1        |
| A21233260b_b          | Unknown         | 3.22e3     | N/A           | 3.54     | 4.4   | N/A         | 4.322690e-1        |
| A21233261b_b          | Unknown         | 5.25e3     | N/A           | 3.54     | 8.5   | N/A         | 6.917752e-1        |
| A21233262b_b          | Unknown         | 2.23e5     | N/A           | 3.54     | 99.7  | N/A         | 2.862885e1         |
| A21233263b_b          | Unknown         | 6.99e5     | N/A           | 3.53     | 44.3  | N/A         | 8.967587e1         |
| A21233264b_b          | Unknown         | 7.43e5     | N/A           | 3.54     | 42.3  | N/A         | 9.523166e1         |
| A21233265b_b          | Unknown         | 3.93e5     | N/A           | 3.54     | 24.8  | N/A         | 5.040240e1         |
| A21233266b_b          | Unknown         | 4.77e5     | N/A           | 3.53     | 37.8  | N/A         | 6.118776e1         |
| A21233267b_b          | Unknown         | 1.58e5     | N/A           | 3.54     | 17.9  | N/A         | 2.025675e1         |

Compound name: Dihydrokaempferol

Regression Equation:  $y = 7800.13496x + -149.89212$  ( $r = 0.99810$ ) (weighting:  $1/x$ )

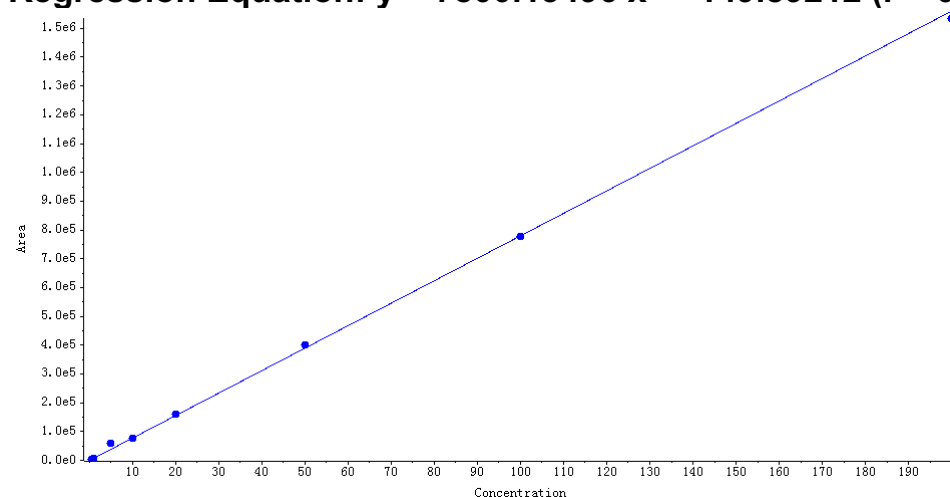

### Peak Review

Blank

Dihydrokaempferol AREA:N/A  
S/N:N/A

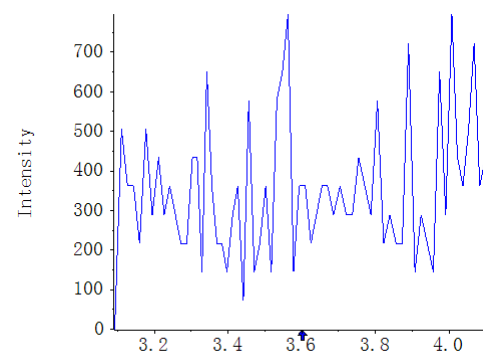

V1.0\_MWMS\_20211021\_1

Dihydrokaempferol AREA:1.17e6  
S/N:233.4

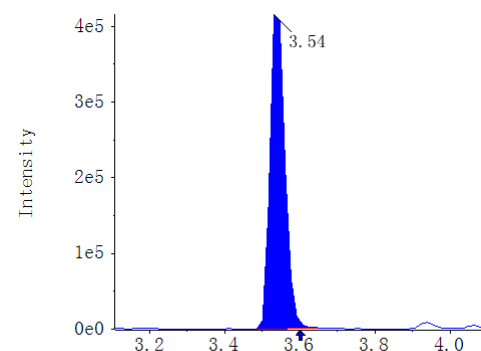

A21233250b\_b

Dihydrokaempferol AREA:4.95e3  
S/N:9.2

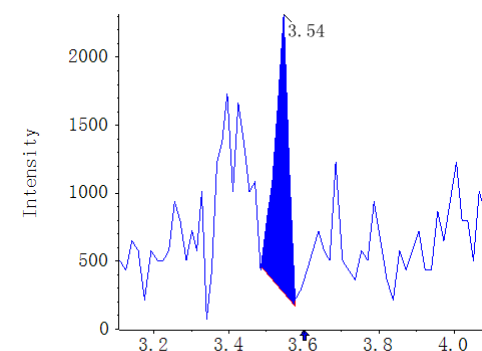

A21233251b\_b

Dihydrokaempferol AREA:3.54e3  
S/N:4.2

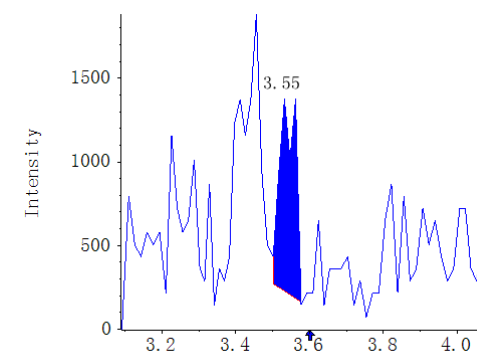

A21233252b\_b

Dihydrokaempferol AREA:4.49e3  
S/N:6.2

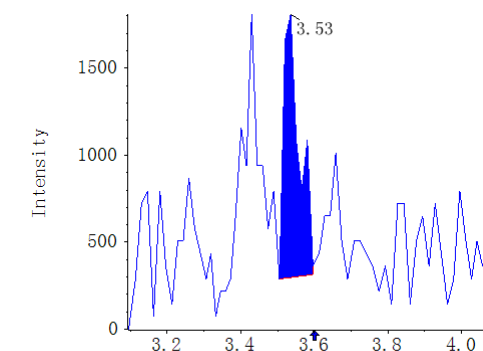

A21233253b\_b

Dihydrokaempferol AREA:5.76e5  
S/N:41.5

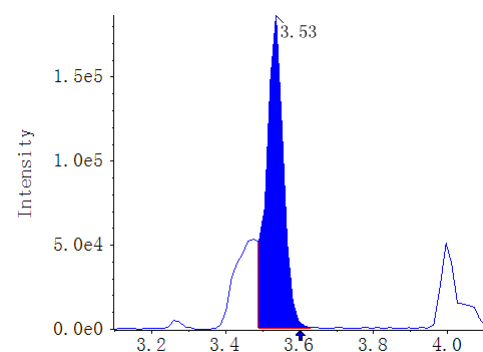

A21233254b\_b

Dihydrokaempferol AREA:6.83e5  
S/N:68.4

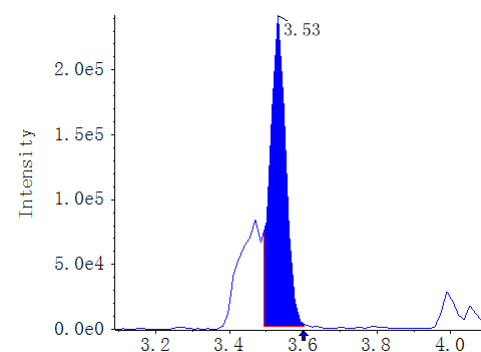

A21233255b\_b

Dihydrokaempferol AREA:7.91e5  
S/N:49.4

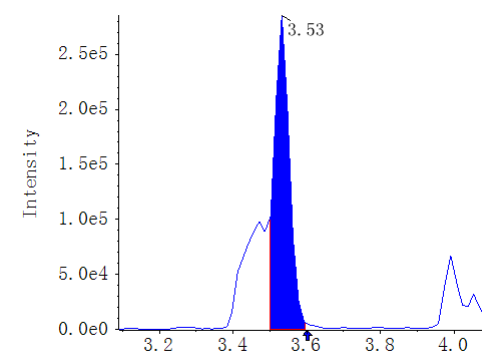

A21233256b\_b

Dihydrokaempferol AREA:1.99e5  
S/N:23.9

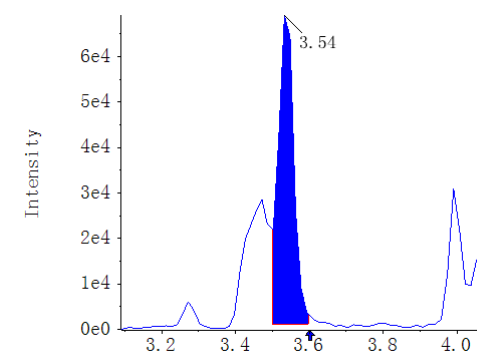

A21233257b\_b

Dihydrokaempferol AREA:2.62e5  
S/N:23.3

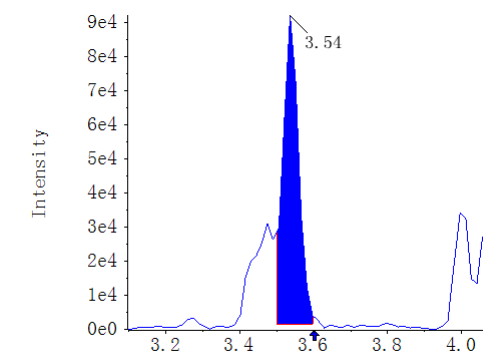

**A21233258b\_b**

Dihydrokaempferol AREA:1.44e5  
S/N:36.1

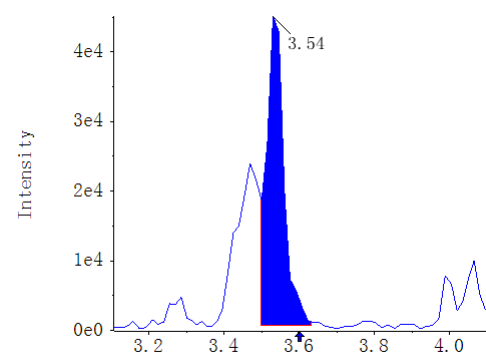

**A21233259b\_b**

Dihydrokaempferol AREA:7.31e3  
S/N:15.8

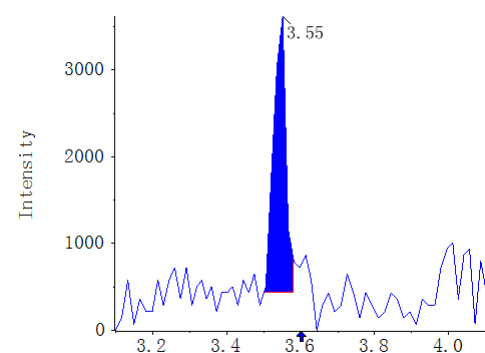

**A21233260b\_b**

Dihydrokaempferol AREA:3.22e3  
S/N:4.4

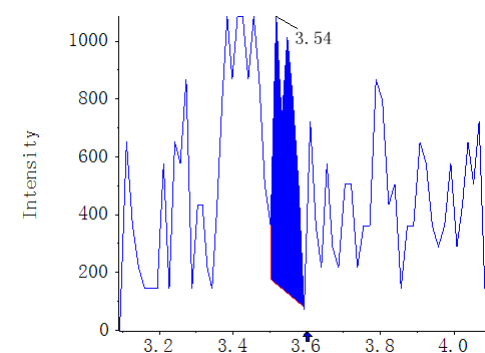

**A21233261b\_b**

Dihydrokaempferol AREA:5.25e3  
S/N:8.5

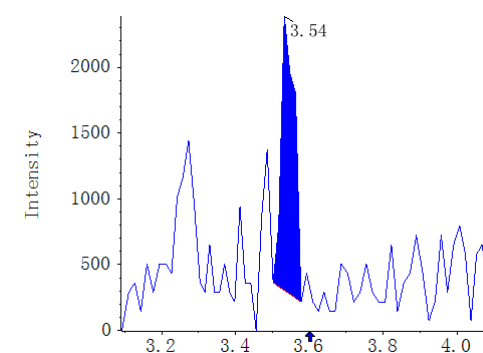

**A21233262b\_b**

Dihydrokaempferol AREA:2.23e5  
S/N:99.7

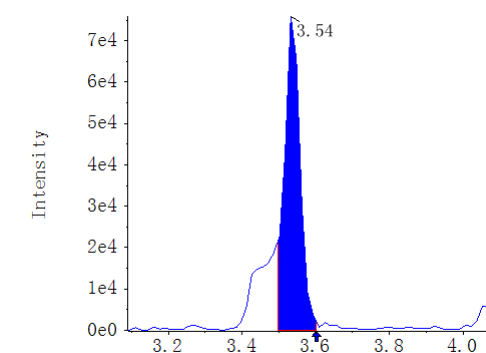

**A21233263b\_b**

Dihydrokaempferol AREA:6.99e5  
S/N:44.3

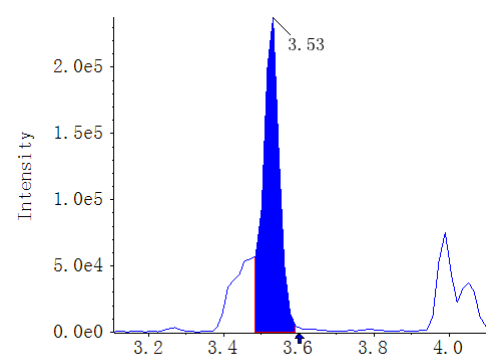

**A21233264b\_b**

Dihydrokaempferol AREA:7.43e5  
S/N:42.3

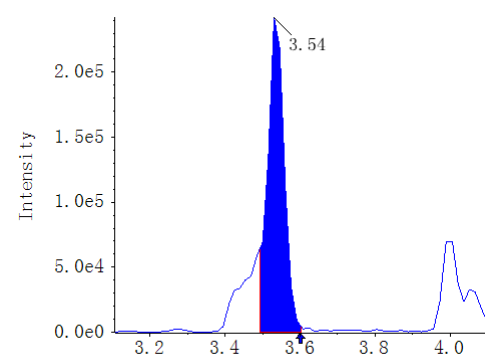

**A21233265b\_b**

Dihydrokaempferol AREA:3.93e5  
S/N:24.8

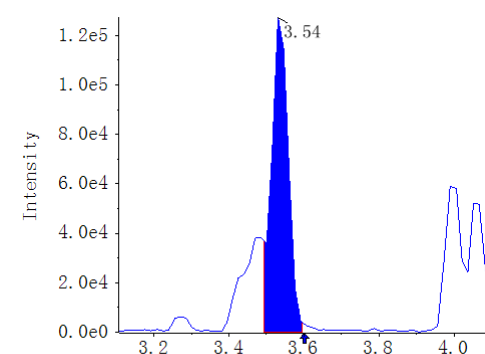

**A21233266b\_b**

Dihydrokaempferol AREA:4.77e5  
S/N:37.8

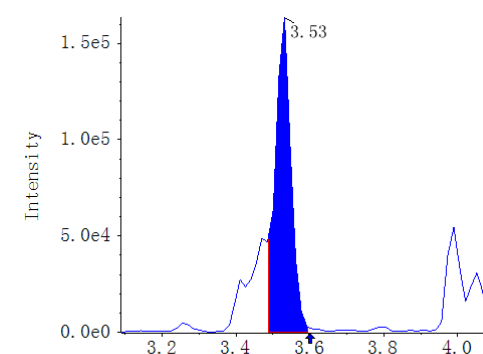

**A21233267b\_b**

Dihydrokaempferol AREA:1.58e5  
S/N:17.9

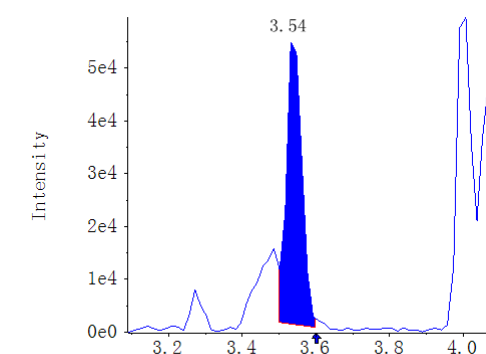

|                    |                                                    |                 |                      |
|--------------------|----------------------------------------------------|-----------------|----------------------|
| Result Table       | MWXS-21-2101D-3_18_WH6500-5_A20-3_V1.0_TY_20211028 | Algorithm Used  | MQ4                  |
| Acquisition Method | Flavonoids_V1.0_WH6500-5_LT_20211025.dam           | Instrument Name | QTRAP 6500+ Low Mass |
| Project            | N/A                                                | Analytes QTY    | 204:117              |

**Compound name: Procyanidin B2 (577.1 / 407.1)**

| Sample Name           | Sample Type     | Area (cps) | Is Area (cps) | RT (min) | S/N   | Target Conc | Calculated Conc.() |
|-----------------------|-----------------|------------|---------------|----------|-------|-------------|--------------------|
| STD_0.5nM             | Standard        | 1.25e3     | N/A           | 2.21     | 4.7   | 0.5000      | 4.387243e-1        |
| STD_1nM               | Standard        | 1.78e3     | N/A           | 2.22     | 9.9   | 1.0000      | 8.843911e-1        |
| STD_5nM               | Standard        | 8.86e3     | N/A           | 2.22     | 51.8  | 5.0000      | 6.769898e0         |
| STD_10nM              | Standard        | 1.26e4     | N/A           | 2.22     | 49.9  | 10.0000     | 9.873861e0         |
| STD_20nM              | Standard        | 2.19e4     | N/A           | 2.22     | 72.2  | 20.0000     | 1.757610e1         |
| STD_50nM              | Standard        | 6.28e4     | N/A           | 2.22     | 129.5 | 50.0000     | 5.164126e1         |
| STD_100nM             | Standard        | 1.18e5     | N/A           | 2.23     | 182.0 | 100.0000    | 9.771708e1         |
| STD_200nM             | Standard        | 2.43e5     | N/A           | 2.22     | 279.8 | 200.0000    | 2.015987e2         |
| STD_500nM             | Standard        | N/A        | N/A           | N/A      | N/A   | 500.0000    | N/A                |
| STD_1000nM            | Standard        | N/A        | N/A           | N/A      | N/A   | 1000.0000   | N/A                |
| STD_2000nM            | Standard        | N/A        | N/A           | N/A      | N/A   | 2000.0000   | N/A                |
| V1.0_MW_RQC1_20211018 | Quality Control | N/A        | N/A           | N/A      | N/A   | 0.0000      | N/A                |
| Blank                 | Unknown         | N/A        | N/A           | N/A      | N/A   | N/A         | N/A                |
| V1.0_MWMS_20211021_1  | Unknown         | 1.92e5     | N/A           | 2.22     | 122.8 | N/A         | 1.593647e2         |
| MWXS212101D3_R1       | Quality Control | 1.95e5     | N/A           | 2.22     | 118.7 | 0.0000      | 1.619343e2         |
| MWXS212101D3_R2       | Quality Control | 1.90e5     | N/A           | 2.22     | 123.1 | 0.0000      | 1.571268e2         |
| MWXS212101D3_R3       | Quality Control | 2.04e5     | N/A           | 2.22     | 140.3 | 0.0000      | 1.692067e2         |
| A21233250b_b          | Unknown         | 3.38e3     | N/A           | 2.22     | 11.0  | N/A         | 2.210904e0         |
| A21233251b_b          | Unknown         | 2.12e3     | N/A           | 2.22     | 7.1   | N/A         | 1.161958e0         |
| A21233252b_b          | Unknown         | N/A        | N/A           | N/A      | N/A   | N/A         | N/A                |
| A21233253b_b          | Unknown         | 3.40e3     | N/A           | 2.22     | 16.0  | N/A         | 2.226297e0         |
| A21233254b_b          | Unknown         | 3.78e3     | N/A           | 2.22     | 9.0   | N/A         | 2.542628e0         |
| A21233255b_b          | Unknown         | N/A        | N/A           | N/A      | N/A   | N/A         | N/A                |
| A21233256b_b          | Unknown         | 6.01e3     | N/A           | 2.23     | 13.6  | N/A         | 4.395992e0         |
| A21233257b_b          | Unknown         | 5.26e3     | N/A           | 2.22     | 16.7  | N/A         | 3.772568e0         |
| A21233258b_b          | Unknown         | N/A        | N/A           | N/A      | N/A   | N/A         | N/A                |
| A21233259b_b          | Unknown         | 2.15e4     | N/A           | 2.22     | 41.6  | N/A         | 1.731506e1         |
| A21233260b_b          | Unknown         | 4.70e4     | N/A           | 2.22     | 61.4  | N/A         | 3.848137e1         |
| A21233261b_b          | Unknown         | 2.36e4     | N/A           | 2.23     | 28.7  | N/A         | 1.906031e1         |
| A21233262b_b          | Unknown         | N/A        | N/A           | N/A      | N/A   | N/A         | N/A                |
| A21233263b_b          | Unknown         | 4.83e3     | N/A           | 2.22     | 10.6  | N/A         | 3.422076e0         |
| A21233264b_b          | Unknown         | 4.69e3     | N/A           | 2.22     | 14.2  | N/A         | 3.303977e0         |
| A21233265b_b          | Unknown         | N/A        | N/A           | N/A      | N/A   | N/A         | N/A                |
| A21233266b_b          | Unknown         | N/A        | N/A           | N/A      | N/A   | N/A         | N/A                |
| A21233267b_b          | Unknown         | 7.54e3     | N/A           | 2.22     | 12.1  | N/A         | 5.675382e0         |

Compound name: Procyanidin B2

Regression Equation:  $y = 1202.43685x + 719.73578$  ( $r = 0.99856$ ) (weighting:  $1/x$ )

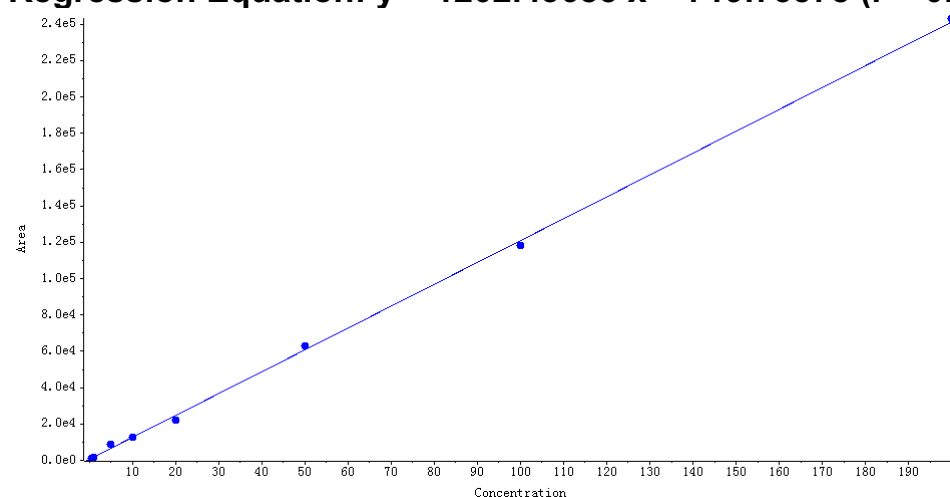

### Peak Review

Blank

Procyanidin B2 AREA:N/A  
S/N:N/A

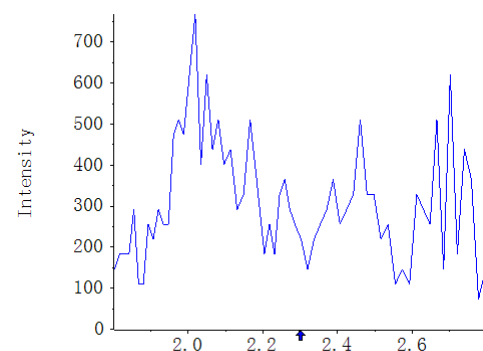

V1.0\_MWMS\_20211021\_1

Procyanidin B2 AREA:1.92e3  
S/N:122.8

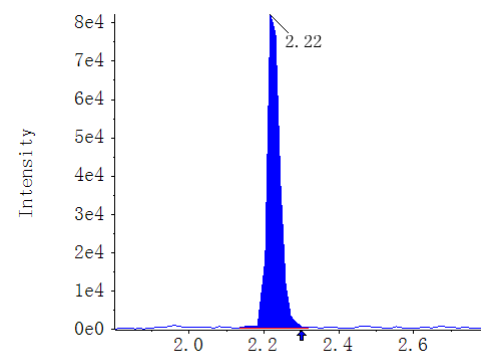

A21233250b\_b

Procyanidin B2 AREA:3.38e3  
S/N:11.0

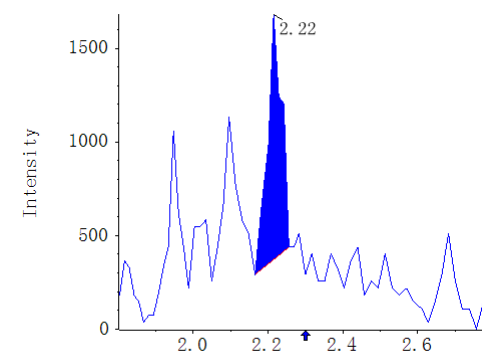

A21233251b\_b

Procyanidin B2 AREA:2.12e3  
S/N:7.1

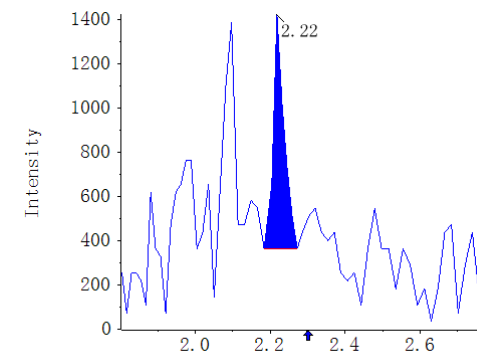

A21233252b\_b

Procyanidin B2 AREA:N/A  
S/N:N/A

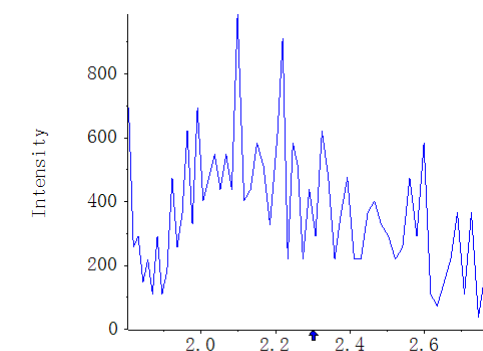

A21233253b\_b

Procyanidin B2 AREA:3.40e3  
S/N:16.0

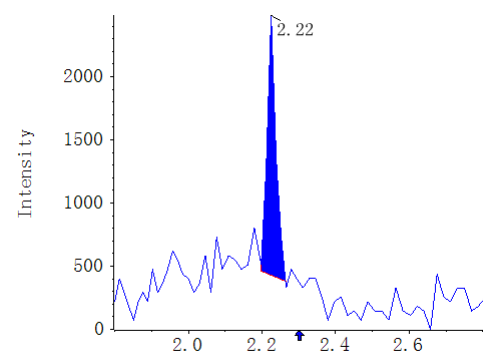

A21233254b\_b

Procyanidin B2 AREA:3.78e3  
S/N:9.0

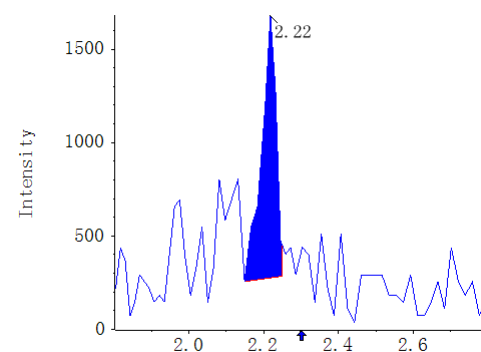

A21233255b\_b

Procyanidin B2 AREA:N/A  
S/N:N/A

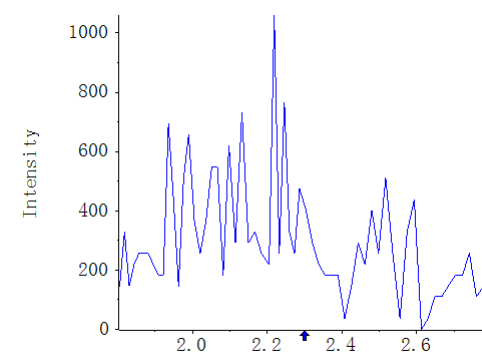

A21233256b\_b

Procyanidin B2 AREA:6.01e3  
S/N:13.6

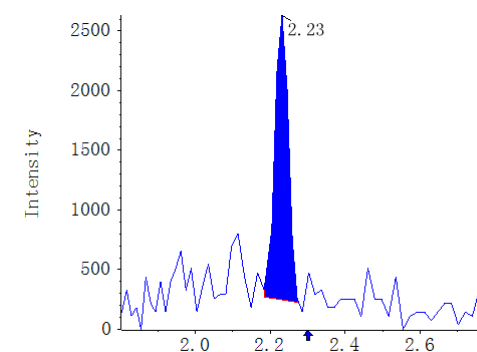

A21233257b\_b

Procyanidin B2 AREA:5.26e3  
S/N:16.7

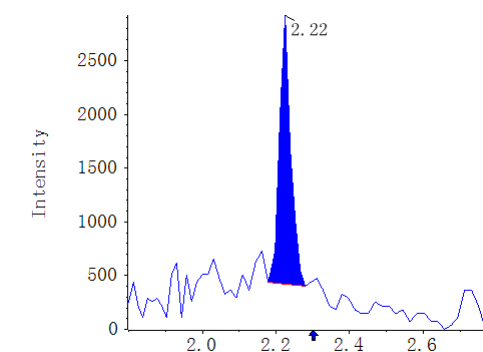

**A21233258b\_b**

Procyanidin B2 AREA:N/A  
S/N:N/A

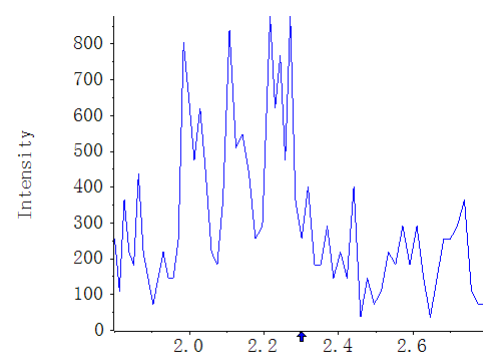

**A21233259b\_b**

Procyanidin B2 AREA:2.15e4  
S/N:41.6

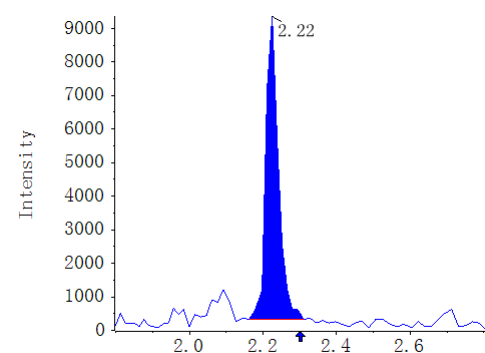

**A21233260b\_b**

Procyanidin B2 AREA:4.70e4  
S/N:61.4

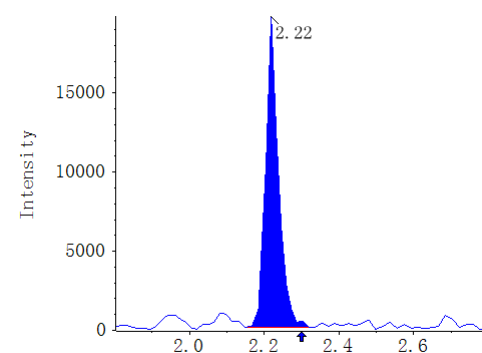

**A21233261b\_b**

Procyanidin B2 AREA:2.36e4  
S/N:28.7

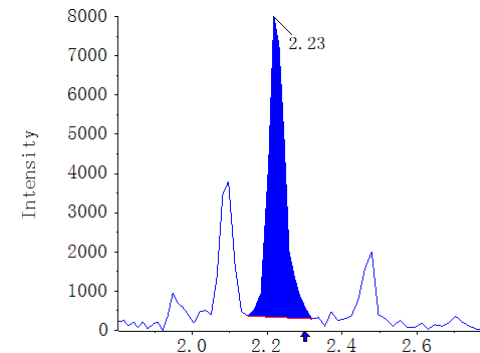

**A21233262b\_b**

Procyanidin B2 AREA:N/A  
S/N:N/A

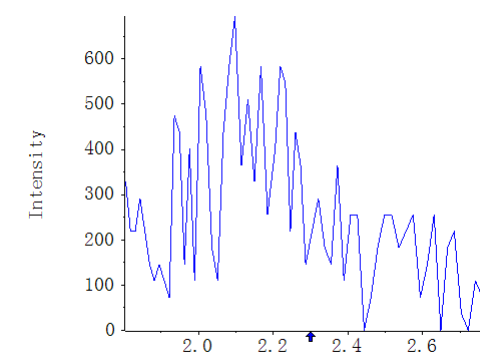

**A21233263b\_b**

Procyanidin B2 AREA:4.83e3  
S/N:10.6

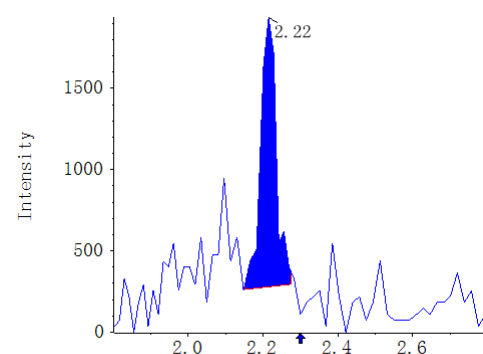

**A21233264b\_b**

Procyanidin B2 AREA:4.69e3  
S/N:14.2

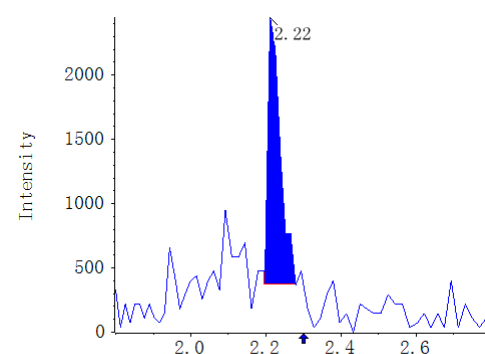

**A21233265b\_b**

Procyanidin B2 AREA:N/A  
S/N:N/A

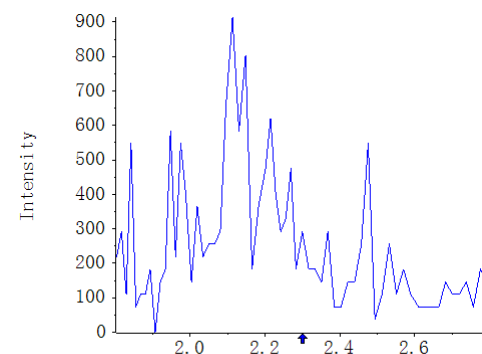

**A21233266b\_b**

Procyanidin B2 AREA:N/A  
S/N:N/A

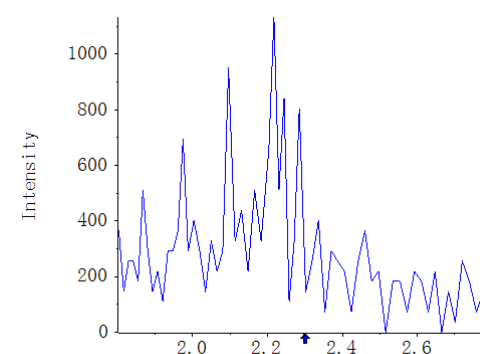

**A21233267b\_b**

Procyanidin B2 AREA:7.54e3  
S/N:12.1

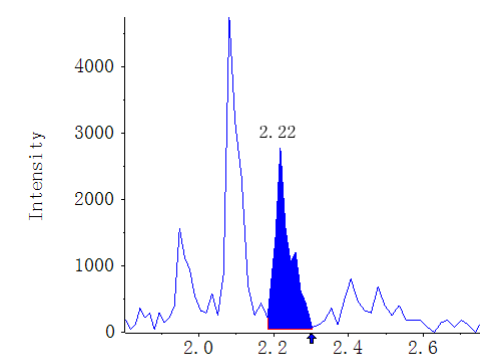

|                    |                                                    |                 |                      |
|--------------------|----------------------------------------------------|-----------------|----------------------|
| Result Table       | MWXS-21-2101D-3_18_WH6500-5_A20-3_V1.0_TY_20211028 | Algorithm Used  | MQ4                  |
| Acquisition Method | Flavonoids_V1.0_WH6500-5_LT_20211025.dam           | Instrument Name | QTRAP 6500+ Low Mass |
| Project            | N/A                                                | Analytes QTY    | 204:119              |

## Compound name: (-)-Epicatechin (289.1 / 109.0)

| Sample Name           | Sample Type     | Area (cps) | Is Area (cps) | RT (min) | S/N  | Target Conc | Calculated Conc.() |
|-----------------------|-----------------|------------|---------------|----------|------|-------------|--------------------|
| STD_0.5nM             | Standard        | 2.14e3     | N/A           | 2.36     | 5.1  | 0.5000      | 3.637130e-1        |
| STD_1nM               | Standard        | 3.21e3     | N/A           | 2.38     | 8.0  | 1.0000      | 1.026735e0         |
| STD_5nM               | Standard        | 1.26e4     | N/A           | 2.39     | 21.0 | 5.0000      | 6.800297e0         |
| STD_10nM              | Standard        | 1.70e4     | N/A           | 2.39     | 28.3 | 10.0000     | 9.503262e0         |
| STD_20nM              | Standard        | 3.30e4     | N/A           | 2.38     | 39.5 | 20.0000     | 1.938113e1         |
| STD_50nM              | Standard        | 8.07e4     | N/A           | 2.39     | 63.2 | 50.0000     | 4.880587e1         |
| STD_100nM             | Standard        | 1.60e5     | N/A           | 2.39     | 63.0 | 100.0000    | 9.743692e1         |
| STD_200nM             | Standard        | 3.31e5     | N/A           | 2.38     | 87.0 | 200.0000    | 2.031821e2         |
| STD_500nM             | Standard        | N/A        | N/A           | N/A      | N/A  | 500.0000    | N/A                |
| STD_1000nM            | Standard        | N/A        | N/A           | N/A      | N/A  | 1000.0000   | N/A                |
| STD_2000nM            | Standard        | N/A        | N/A           | N/A      | N/A  | 2000.0000   | N/A                |
| V1.0_MW_RQC1_20211018 | Quality Control | N/A        | N/A           | N/A      | N/A  | 0.0000      | N/A                |
| Blank                 | Unknown         | N/A        | N/A           | N/A      | N/A  | N/A         | N/A                |
| V1.0_MWMS_20211021_1  | Unknown         | 2.57e5     | N/A           | 2.39     | 69.4 | N/A         | 1.577497e2         |
| MWXS212101D3_R1       | Quality Control | 2.71e5     | N/A           | 2.39     | 67.6 | 0.0000      | 1.664434e2         |
| MWXS212101D3_R2       | Quality Control | 2.68e5     | N/A           | 2.39     | 81.2 | 0.0000      | 1.643503e2         |
| MWXS212101D3_R3       | Quality Control | 2.62e5     | N/A           | 2.39     | 70.9 | 0.0000      | 1.605789e2         |
| A21233250b_b          | Unknown         | 1.98e4     | N/A           | 2.40     | 14.7 | N/A         | 1.125748e1         |
| A21233251b_b          | Unknown         | 1.43e4     | N/A           | 2.40     | 11.5 | N/A         | 7.881598e0         |
| A21233252b_b          | Unknown         | 5.09e3     | N/A           | 2.40     | 4.4  | N/A         | 2.182918e0         |
| A21233253b_b          | Unknown         | 1.10e4     | N/A           | 2.39     | 6.2  | N/A         | 5.844982e0         |
| A21233254b_b          | Unknown         | 1.30e4     | N/A           | 2.40     | 8.6  | N/A         | 7.068088e0         |
| A21233255b_b          | Unknown         | 5.62e3     | N/A           | 2.40     | 4.1  | N/A         | 2.510533e0         |
| A21233256b_b          | Unknown         | 1.70e4     | N/A           | 2.39     | 6.4  | N/A         | 9.545901e0         |
| A21233257b_b          | Unknown         | 1.46e4     | N/A           | 2.39     | 2.8  | N/A         | 8.049653e0         |
| A21233258b_b          | Unknown         | 8.81e3     | N/A           | 2.40     | 4.2  | N/A         | 4.478551e0         |
| A21233259b_b          | Unknown         | 2.63e4     | N/A           | 2.39     | 23.8 | N/A         | 1.524820e1         |
| A21233260b_b          | Unknown         | 6.38e4     | N/A           | 2.39     | 41.8 | N/A         | 3.837825e1         |
| A21233261b_b          | Unknown         | 2.04e5     | N/A           | 2.39     | 46.0 | N/A         | 1.249132e2         |
| A21233262b_b          | Unknown         | 6.20e3     | N/A           | 2.40     | 5.5  | N/A         | 2.872868e0         |
| A21233263b_b          | Unknown         | 9.91e3     | N/A           | 2.39     | 6.3  | N/A         | 5.157025e0         |
| A21233264b_b          | Unknown         | 1.08e4     | N/A           | 2.40     | 4.9  | N/A         | 5.732591e0         |
| A21233265b_b          | Unknown         | 5.66e3     | N/A           | 2.41     | 2.7  | N/A         | 2.537508e0         |
| A21233266b_b          | Unknown         | 7.33e3     | N/A           | 2.40     | 3.4  | N/A         | 3.565371e0         |
| A21233267b_b          | Unknown         | 1.71e4     | N/A           | 2.39     | 4.4  | N/A         | 9.600235e0         |

Compound name: (-)-Epicatechin

Regression Equation:  $y = 1621.16703x + 1547.17300$  ( $r = 0.99881$ ) (weighting:  $1/x$ )

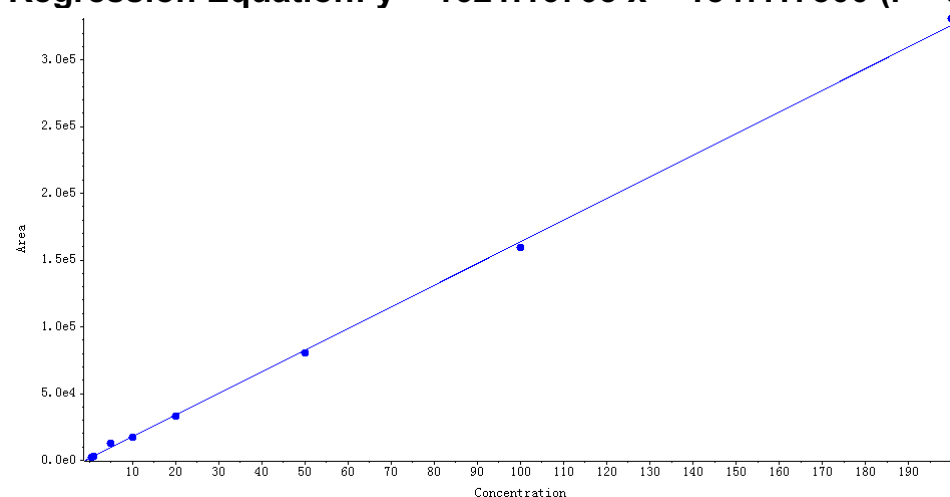

## Peak Review

Blank

(-)-Epicatechin

AREA:N/A

S/N:N/A

V1.0\_MWMS\_20211021\_1

(-)-Epicatechin AREA:2.57e5

S/N:69.4

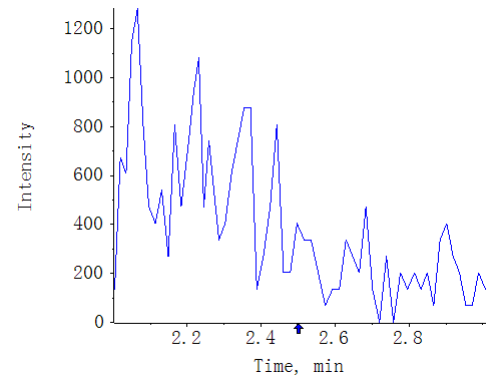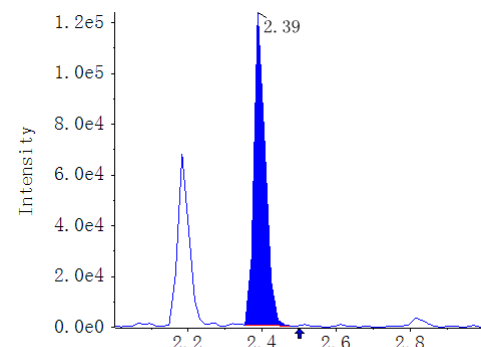

A21233250b\_b

(-)-Epicatechin

AREA:1.98e4

S/N:14.7

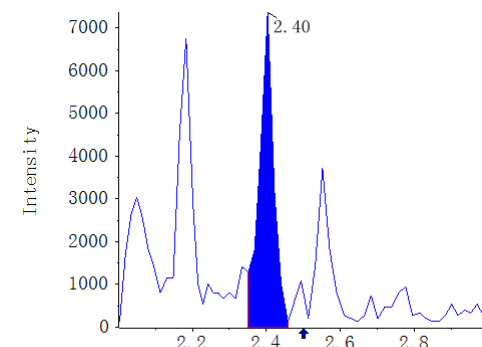

A21233251b\_b

(-)-Epicatechin

AREA:1.43e4

S/N:11.5

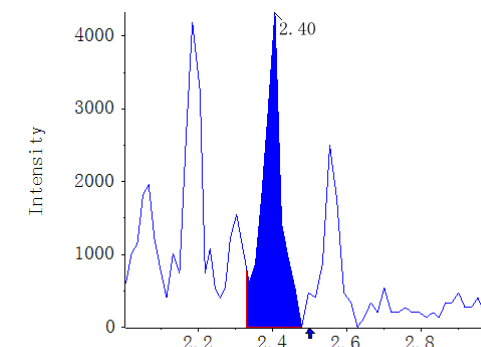

A21233252b\_b

(-)-Epicatechin

AREA:5.09e3

S/N:4.4

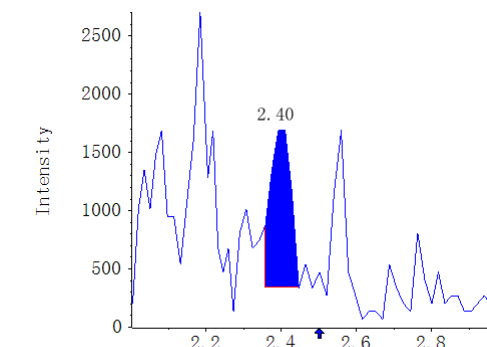

A21233253b\_b

(-)-Epicatechin

AREA:1.10e4

S/N:6.2

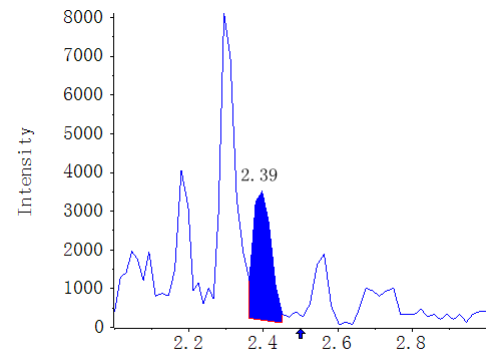

A21233254b\_b

(-)-Epicatechin

AREA:1.30e4

S/N:8.6

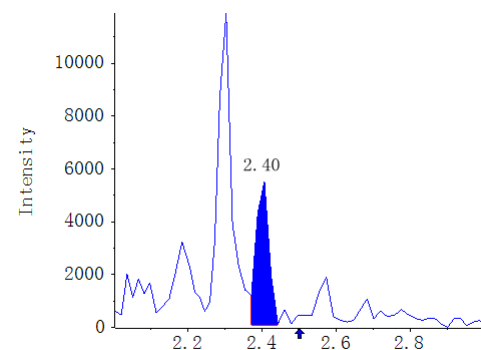

A21233255b\_b

(-)-Epicatechin

AREA:5.62e3

S/N:4.1

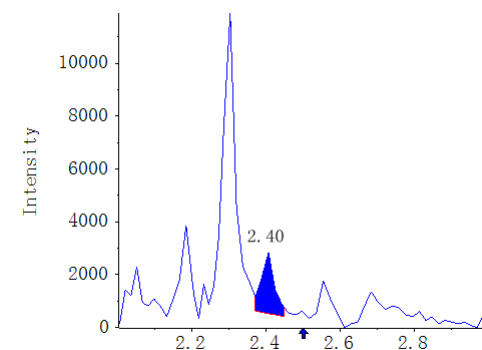

A21233256b\_b

(-)-Epicatechin

AREA:1.70e4

S/N:6.4

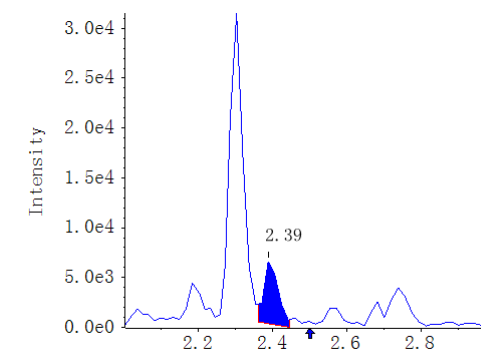

A21233257b\_b

(-)-Epicatechin

AREA:1.46e4

S/N:2.8

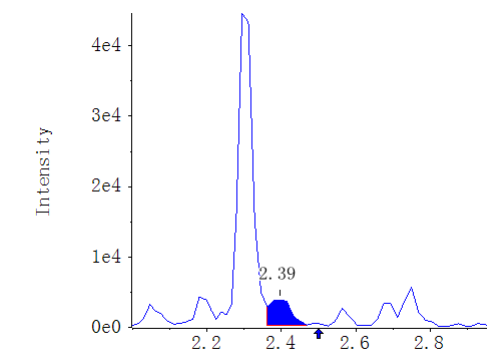

**A21233258b\_b**  
(-)-Epicatechin AREA:8.81e3  
S/N:4.2

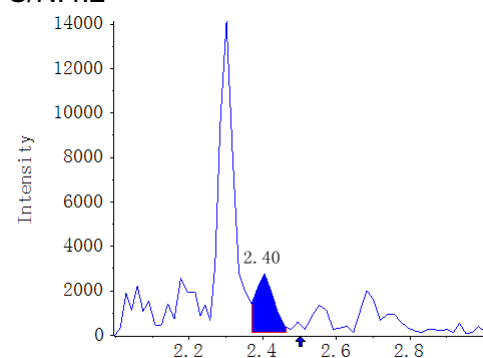

**A21233259b\_b**  
(-)-Epicatechin AREA:2.63e4  
S/N:23.8

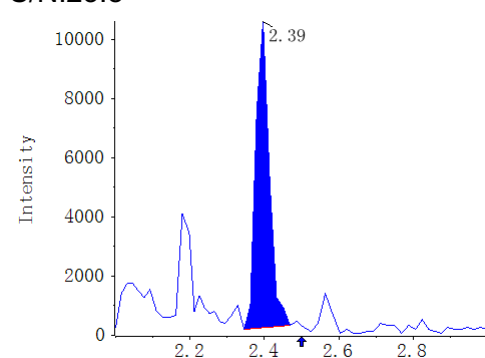

**A21233260b\_b**  
(-)-Epicatechin AREA:6.38e4  
S/N:41.8

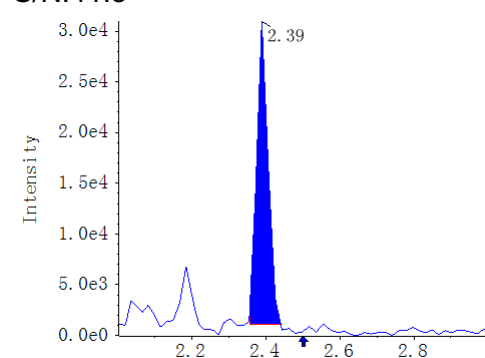

**A21233261b\_b**  
(-)-Epicatechin AREA:2.04e5  
S/N:46.0

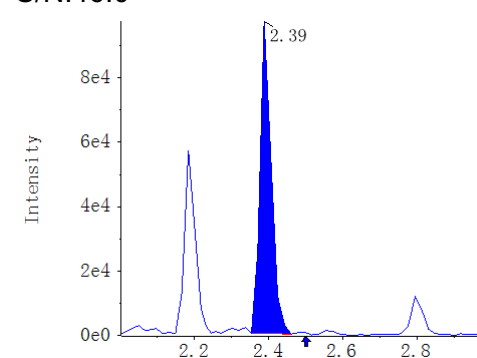

**A21233262b\_b**  
(-)-Epicatechin AREA:6.20e3  
S/N:5.5

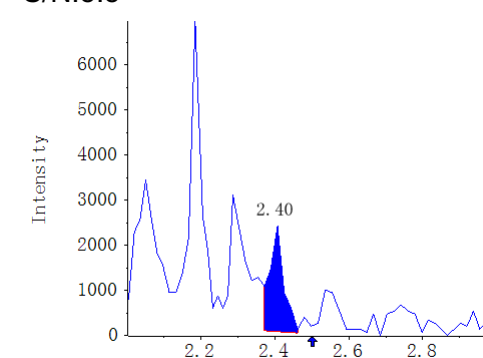

**A21233263b\_b**  
(-)-Epicatechin AREA:9.91e3  
S/N:6.3

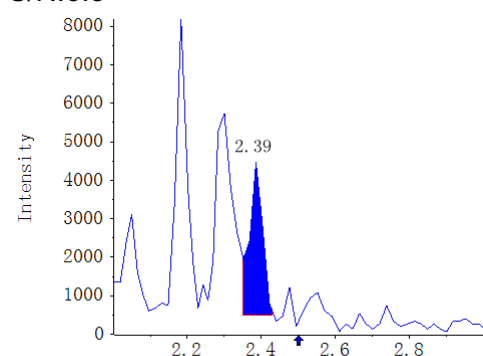

**A21233264b\_b**  
(-)-Epicatechin AREA:1.08e4  
S/N:4.9

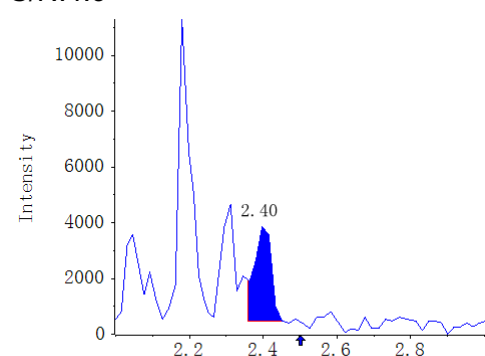

**A21233265b\_b**  
(-)-Epicatechin AREA:5.66e3  
S/N:2.7

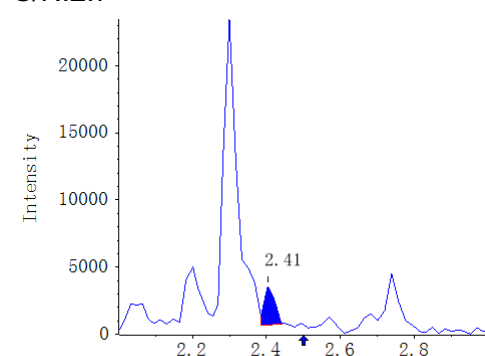

**A21233266b\_b**  
(-)-Epicatechin AREA:7.33e3  
S/N:3.4

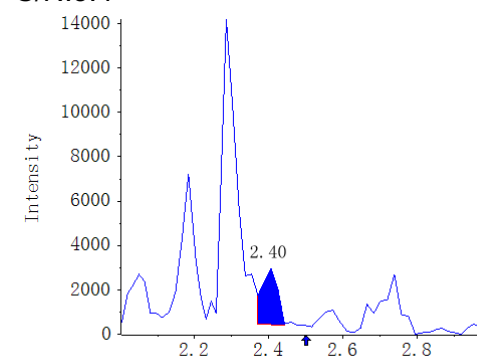

**A21233267b\_b**  
(-)-Epicatechin AREA:1.71e4  
S/N:4.4

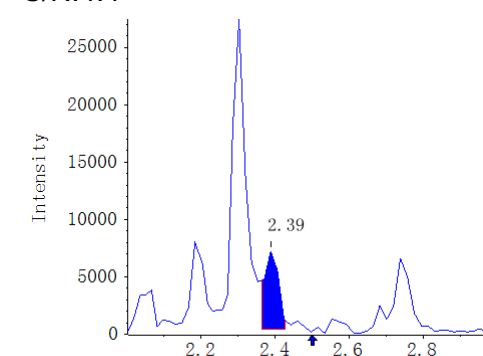

|                    |                                                    |                 |                      |
|--------------------|----------------------------------------------------|-----------------|----------------------|
| Result Table       | MWXS-21-2101D-3_18_WH6500-5_A20-3_V1.0_TY_20211028 | Algorithm Used  | MQ4                  |
| Acquisition Method | Flavonoids_V1.0_WH6500-5_LT_20211025.dam           | Instrument Name | QTRAP 6500+ Low Mass |
| Project            | N/A                                                | Analytes QTY    | 204:122              |

**Compound name: (-)-Catechin gallate (441.1 / 169.0)**

| Sample Name           | Sample Type     | Area (cps) | Is Area (cps) | RT (min) | S/N   | Target Conc | Calculated Conc.() |
|-----------------------|-----------------|------------|---------------|----------|-------|-------------|--------------------|
| STD_0.5nM             | Standard        | 9.17e3     | N/A           | 2.80     | 34.3  | 0.5000      | 3.713242e-1        |
| STD_1nM               | Standard        | 1.48e4     | N/A           | 2.80     | 31.5  | 1.0000      | 1.072626e0         |
| STD_5nM               | Standard        | 5.62e4     | N/A           | 2.81     | 80.5  | 5.0000      | 6.206785e0         |
| STD_10nM              | Standard        | 8.28e4     | N/A           | 2.81     | 109.1 | 10.0000     | 9.512935e0         |
| STD_20nM              | Standard        | 1.64e5     | N/A           | 2.81     | 193.5 | 20.0000     | 1.961963e1         |
| STD_50nM              | Standard        | 4.20e5     | N/A           | 2.81     | 181.9 | 50.0000     | 5.142877e1         |
| STD_100nM             | Standard        | 7.97e5     | N/A           | 2.82     | 192.3 | 100.0000    | 9.821576e1         |
| STD_200nM             | Standard        | 1.62e6     | N/A           | 2.81     | 196.7 | 200.0000    | 2.000722e2         |
| STD_500nM             | Standard        | N/A        | N/A           | N/A      | N/A   | 500.0000    | N/A                |
| STD_1000nM            | Standard        | N/A        | N/A           | N/A      | N/A   | 1000.0000   | N/A                |
| STD_2000nM            | Standard        | N/A        | N/A           | N/A      | N/A   | 2000.0000   | N/A                |
| V1.0_MW_RQC1_20211018 | Quality Control | 2.38e4     | N/A           | 2.79     | 17.8  | 0.0000      | 2.187240e0         |
| Blank                 | Unknown         | N/A        | N/A           | N/A      | N/A   | N/A         | N/A                |
| V1.0_MWMS_20211021_1  | Unknown         | 1.38e6     | N/A           | 2.82     | 261.4 | N/A         | 1.700481e2         |
| MWXS212101D3_R1       | Quality Control | 1.42e6     | N/A           | 2.81     | 326.5 | 0.0000      | 1.759931e2         |
| MWXS212101D3_R2       | Quality Control | 1.40e6     | N/A           | 2.82     | 261.2 | 0.0000      | 1.736689e2         |
| MWXS212101D3_R3       | Quality Control | 1.37e6     | N/A           | 2.82     | 232.8 | 0.0000      | 1.695664e2         |
| A21233250b_b          | Unknown         | 2.57e4     | N/A           | 2.79     | 24.7  | N/A         | 2.425192e0         |
| A21233251b_b          | Unknown         | 1.34e4     | N/A           | 2.80     | 21.4  | N/A         | 8.966594e-1        |
| A21233252b_b          | Unknown         | 1.11e4     | N/A           | 2.79     | 11.2  | N/A         | 6.124825e-1        |
| A21233253b_b          | Unknown         | 1.80e4     | N/A           | 2.80     | 14.4  | N/A         | 1.470894e0         |
| A21233254b_b          | Unknown         | 1.48e4     | N/A           | 2.80     | 13.9  | N/A         | 1.069717e0         |
| A21233255b_b          | Unknown         | 6.77e3     | N/A           | 2.79     | 6.2   | N/A         | 7.263458e-2        |
| A21233256b_b          | Unknown         | 4.87e4     | N/A           | 2.80     | 29.7  | N/A         | 5.280764e0         |
| A21233257b_b          | Unknown         | 6.80e3     | N/A           | 2.79     | 6.1   | N/A         | 7.624027e-2        |
| A21233258b_b          | Unknown         | 1.03e4     | N/A           | 2.80     | 5.5   | N/A         | 5.148400e-1        |
| A21233259b_b          | Unknown         | 7.49e4     | N/A           | 2.80     | 36.0  | N/A         | 8.539600e0         |
| A21233260b_b          | Unknown         | 1.79e5     | N/A           | 2.80     | 68.0  | N/A         | 2.144302e1         |
| A21233261b_b          | Unknown         | 3.06e6     | N/A           | 2.80     | 245.0 | N/A         | 3.792351e2         |
| A21233262b_b          | Unknown         | 7.03e3     | N/A           | 2.79     | 8.0   | N/A         | 1.053520e-1        |
| A21233263b_b          | Unknown         | 1.72e4     | N/A           | 2.79     | 14.5  | N/A         | 1.366088e0         |
| A21233264b_b          | Unknown         | 3.57e4     | N/A           | 2.80     | 19.7  | N/A         | 3.663833e0         |
| A21233265b_b          | Unknown         | 1.77e4     | N/A           | 2.79     | 11.1  | N/A         | 1.435023e0         |
| A21233266b_b          | Unknown         | 1.04e4     | N/A           | 2.79     | 8.1   | N/A         | 5.197340e-1        |
| A21233267b_b          | Unknown         | 2.77e4     | N/A           | 2.80     | 15.9  | N/A         | 2.670438e0         |

Compound name: (-)-Catechin gallate

Regression Equation:  $y = 8051.04169x + 6183.34194$  ( $r = 0.99941$ ) (weighting:  $1/x$ )

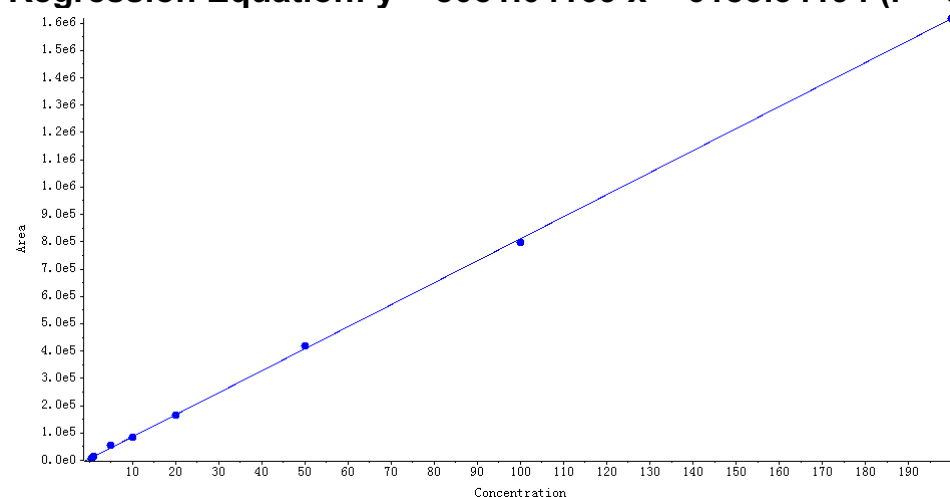

### Peak Review

#### Blank

(-)-Catechin gallate AREA:N/A  
S/N:N/A

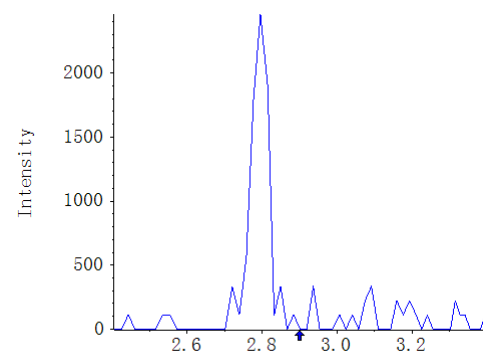

#### V1.0\_MWMS\_20211021\_1

(-)-Catechin gallate AREA:1.38e6  
S/N:261.4

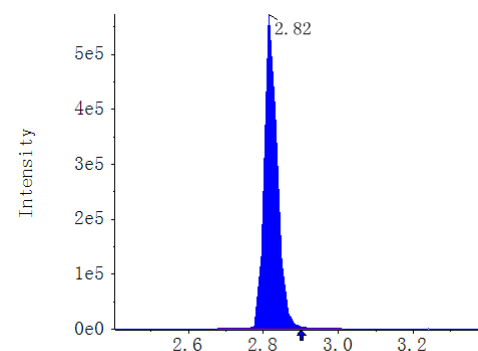

#### A21233250b\_b

(-)-Catechin gallate AREA:2.57e4  
S/N:24.7

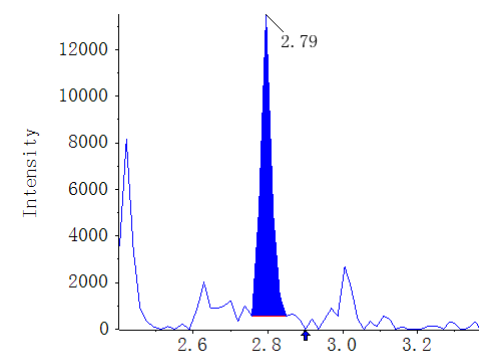

#### A21233251b\_b

(-)-Catechin gallate AREA:1.34e4  
S/N:21.4

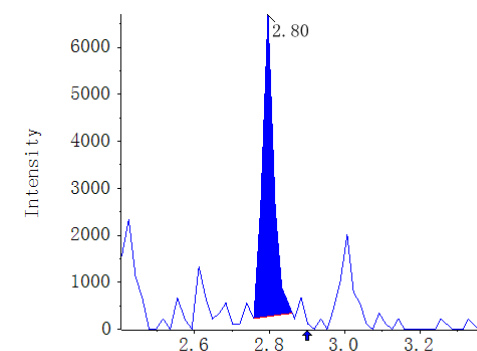

#### A21233252b\_b

(-)-Catechin gallate AREA:1.11e4  
S/N:11.2

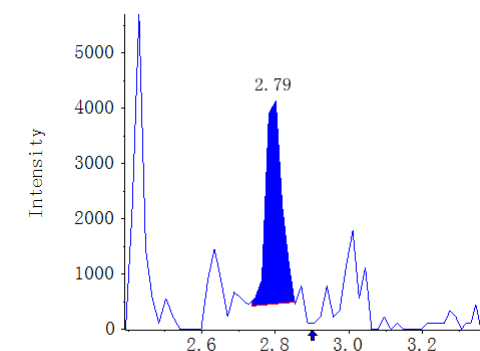

#### A21233253b\_b

(-)-Catechin gallate AREA:1.80e4  
S/N:14.4

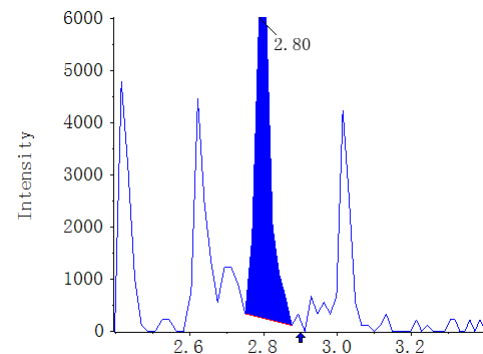

#### A21233254b\_b

(-)-Catechin gallate AREA:1.48e4  
S/N:13.9

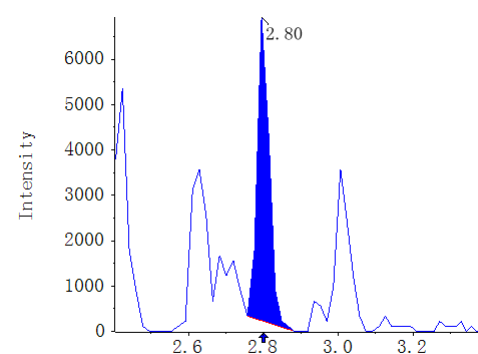

#### A21233255b\_b

(-)-Catechin gallate AREA:6.77e3  
S/N:6.2

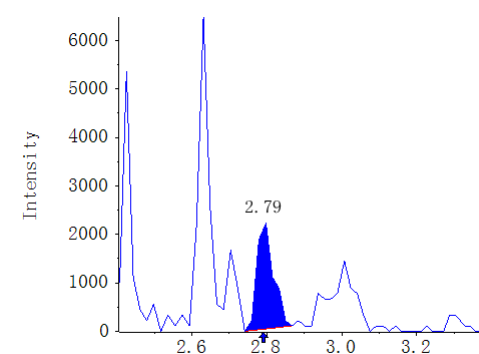

#### A21233256b\_b

(-)-Catechin gallate AREA:4.87e4  
S/N:29.7

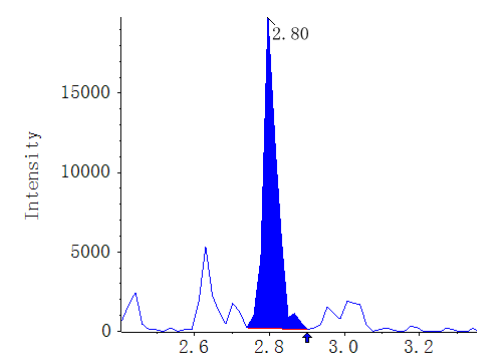

#### A21233257b\_b

(-)-Catechin gallate AREA:6.80e3  
S/N:6.1

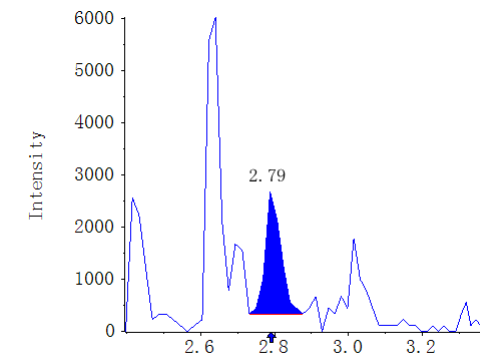

**A21233258b\_b**  
(-)-Catechin gallate AREA:1.03e4  
S/N:5.5

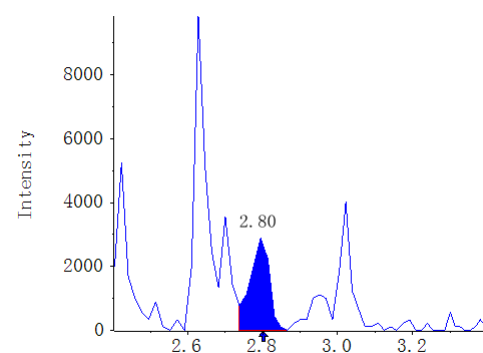

**A21233259b\_b**  
(-)-Catechin gallate AREA:7.49e4  
S/N:36.0

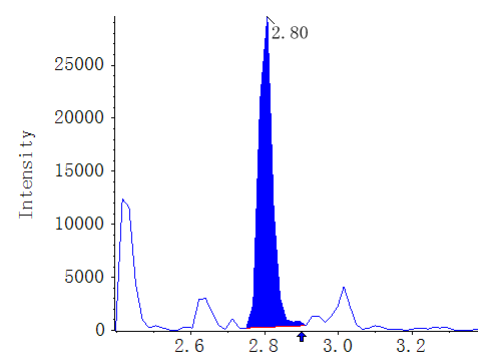

**A21233260b\_b**  
(-)-Catechin gallate AREA:1.79e5  
S/N:68.0

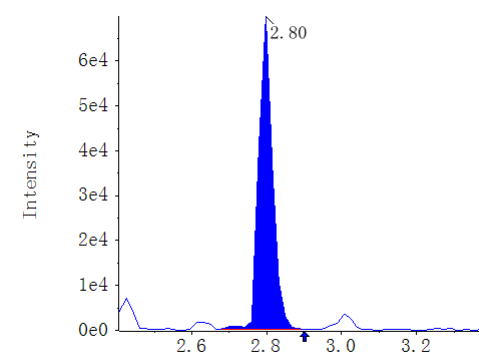

**A21233261b\_b**  
(-)-Catechin gallate AREA:3.06e6  
S/N:245.0

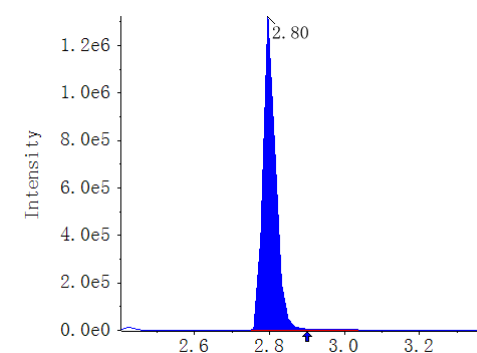

**A21233262b\_b**  
(-)-Catechin gallate AREA:7.03e3  
S/N:8.0

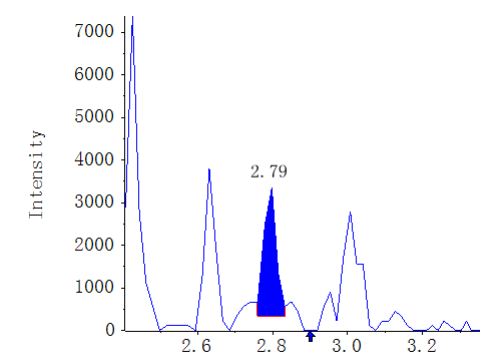

**A21233263b\_b**  
(-)-Catechin gallate AREA:1.72e4  
S/N:14.5

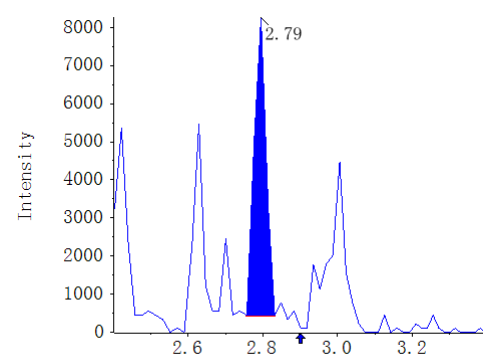

**A21233264b\_b**  
(-)-Catechin gallate AREA:3.57e4  
S/N:19.7

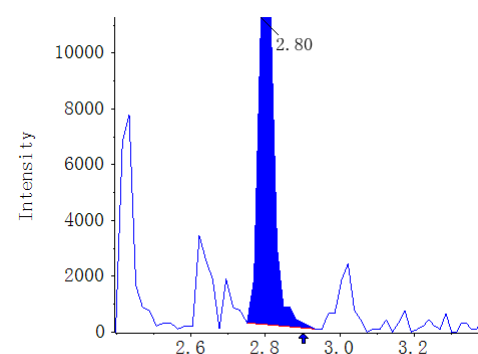

**A21233265b\_b**  
(-)-Catechin gallate AREA:1.77e4  
S/N:11.1

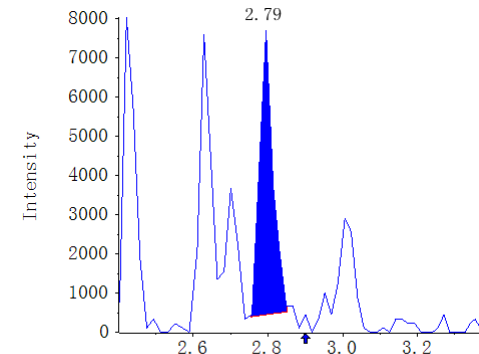

**A21233266b\_b**  
(-)-Catechin gallate AREA:1.04e4  
S/N:8.1

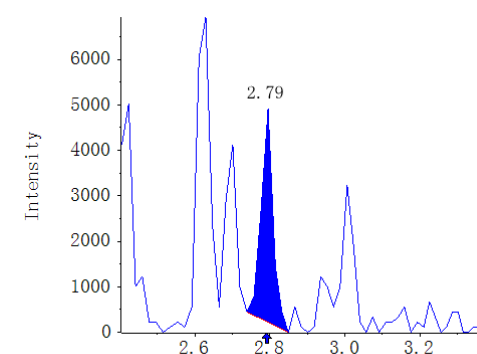

**A21233267b\_b**  
(-)-Catechin gallate AREA:2.77e4  
S/N:15.9

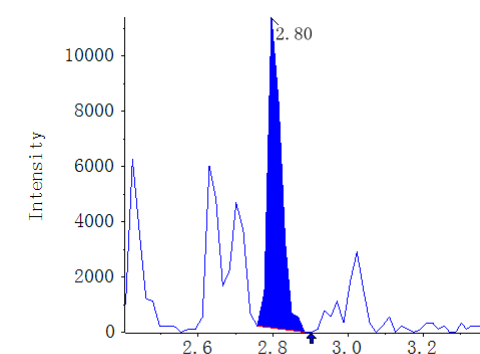

|                    |                                                    |                 |                      |
|--------------------|----------------------------------------------------|-----------------|----------------------|
| Result Table       | MWXS-21-2101D-3_18_WH6500-5_A20-3_V1.0_TY_20211028 | Algorithm Used  | MQ4                  |
| Acquisition Method | Flavonoids_V1.0_WH6500-5_LT_20211025.dam           | Instrument Name | QTRAP 6500+ Low Mass |
| Project            | N/A                                                | Analytes QTY    | 204:124              |

**Compound name: Glycitin (491.1 / 283.1)**

| Sample Name           | Sample Type     | Area (cps) | Is Area (cps) | RT (min) | S/N   | Target Conc | Calculated Conc.() |
|-----------------------|-----------------|------------|---------------|----------|-------|-------------|--------------------|
| STD_0.5nM             | Standard        | 1.75e3     | N/A           | 2.55     | 17.6  | 0.5000      | 3.118867e-1        |
| STD_1nM               | Standard        | 3.71e3     | N/A           | 2.54     | 31.5  | 1.0000      | 8.814235e-1        |
| STD_5nM               | Standard        | 2.59e4     | N/A           | 2.55     | 62.2  | 5.0000      | 7.360354e0         |
| STD_10nM              | Standard        | 3.31e4     | N/A           | 2.55     | 67.0  | 10.0000     | 9.458455e0         |
| STD_20nM              | Standard        | 7.03e4     | N/A           | 2.55     | 117.6 | 20.0000     | 2.031328e1         |
| STD_50nM              | Standard        | 1.91e5     | N/A           | 2.55     | 178.5 | 50.0000     | 5.560798e1         |
| STD_100nM             | Standard        | 3.34e5     | N/A           | 2.56     | 117.3 | 100.0000    | 9.724606e1         |
| STD_200nM             | Standard        | 6.70e5     | N/A           | 2.54     | 122.8 | 200.0000    | 1.953206e2         |
| STD_500nM             | Standard        | N/A        | N/A           | N/A      | N/A   | 500.0000    | N/A                |
| STD_1000nM            | Standard        | N/A        | N/A           | N/A      | N/A   | 1000.0000   | N/A                |
| STD_2000nM            | Standard        | N/A        | N/A           | N/A      | N/A   | 2000.0000   | N/A                |
| V1.0_MW_RQC1_20211018 | Quality Control | N/A        | N/A           | N/A      | N/A   | 0.0000      | N/A                |
| Blank                 | Unknown         | N/A        | N/A           | N/A      | N/A   | N/A         | N/A                |
| V1.0_MWMS_20211021_1  | Unknown         | 5.09e5     | N/A           | 2.55     | 135.1 | N/A         | 1.483464e2         |
| MWXS212101D3_R1       | Quality Control | 5.78e5     | N/A           | 2.55     | 165.4 | 0.0000      | 1.684759e2         |
| MWXS212101D3_R2       | Quality Control | 4.90e5     | N/A           | 2.55     | 150.7 | 0.0000      | 1.428343e2         |
| MWXS212101D3_R3       | Quality Control | 5.54e5     | N/A           | 2.55     | 133.6 | 0.0000      | 1.616138e2         |
| A21233250b_b          | Unknown         | N/A        | N/A           | N/A      | N/A   | N/A         | N/A                |
| A21233251b_b          | Unknown         | N/A        | N/A           | N/A      | N/A   | N/A         | N/A                |
| A21233252b_b          | Unknown         | N/A        | N/A           | N/A      | N/A   | N/A         | N/A                |
| A21233253b_b          | Unknown         | 1.83e4     | N/A           | 2.62     | 13.9  | N/A         | 5.143005e0         |
| A21233254b_b          | Unknown         | 1.20e4     | N/A           | 2.61     | 8.3   | N/A         | 3.294717e0         |
| A21233255b_b          | Unknown         | 1.27e4     | N/A           | 2.62     | 8.0   | N/A         | 3.500754e0         |
| A21233256b_b          | Unknown         | 1.09e4     | N/A           | 2.62     | 5.0   | N/A         | 2.985480e0         |
| A21233257b_b          | Unknown         | 1.13e4     | N/A           | 2.63     | 6.8   | N/A         | 3.094693e0         |
| A21233258b_b          | Unknown         | 1.20e4     | N/A           | 2.62     | 4.8   | N/A         | 3.302655e0         |
| A21233259b_b          | Unknown         | 9.63e3     | N/A           | 2.62     | 5.7   | N/A         | 2.610417e0         |
| A21233260b_b          | Unknown         | 1.07e4     | N/A           | 2.62     | 7.7   | N/A         | 2.934116e0         |
| A21233261b_b          | Unknown         | 3.10e4     | N/A           | 2.62     | 15.1  | N/A         | 8.855546e0         |
| A21233262b_b          | Unknown         | 3.10e4     | N/A           | 2.62     | 11.9  | N/A         | 8.855898e0         |
| A21233263b_b          | Unknown         | 4.27e4     | N/A           | 2.62     | 17.3  | N/A         | 1.225308e1         |
| A21233264b_b          | Unknown         | 8.35e4     | N/A           | 2.63     | 27.3  | N/A         | 2.417925e1         |
| A21233265b_b          | Unknown         | 3.08e4     | N/A           | 2.63     | 10.7  | N/A         | 8.786663e0         |
| A21233266b_b          | Unknown         | 4.45e4     | N/A           | 2.62     | 13.2  | N/A         | 1.278314e1         |
| A21233267b_b          | Unknown         | 3.41e4     | N/A           | 2.63     | 8.3   | N/A         | 9.763036e0         |

Compound name: Glycitin  
Regression Equation:  $y = 3425.51416x + 686.41018$  ( $r = 0.99723$ ) (weighting:  $1/x$ )

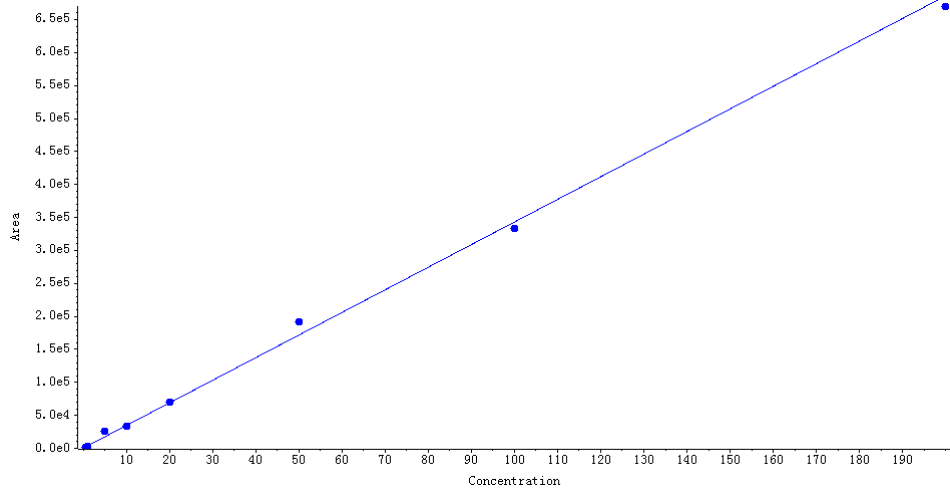

Peak Review

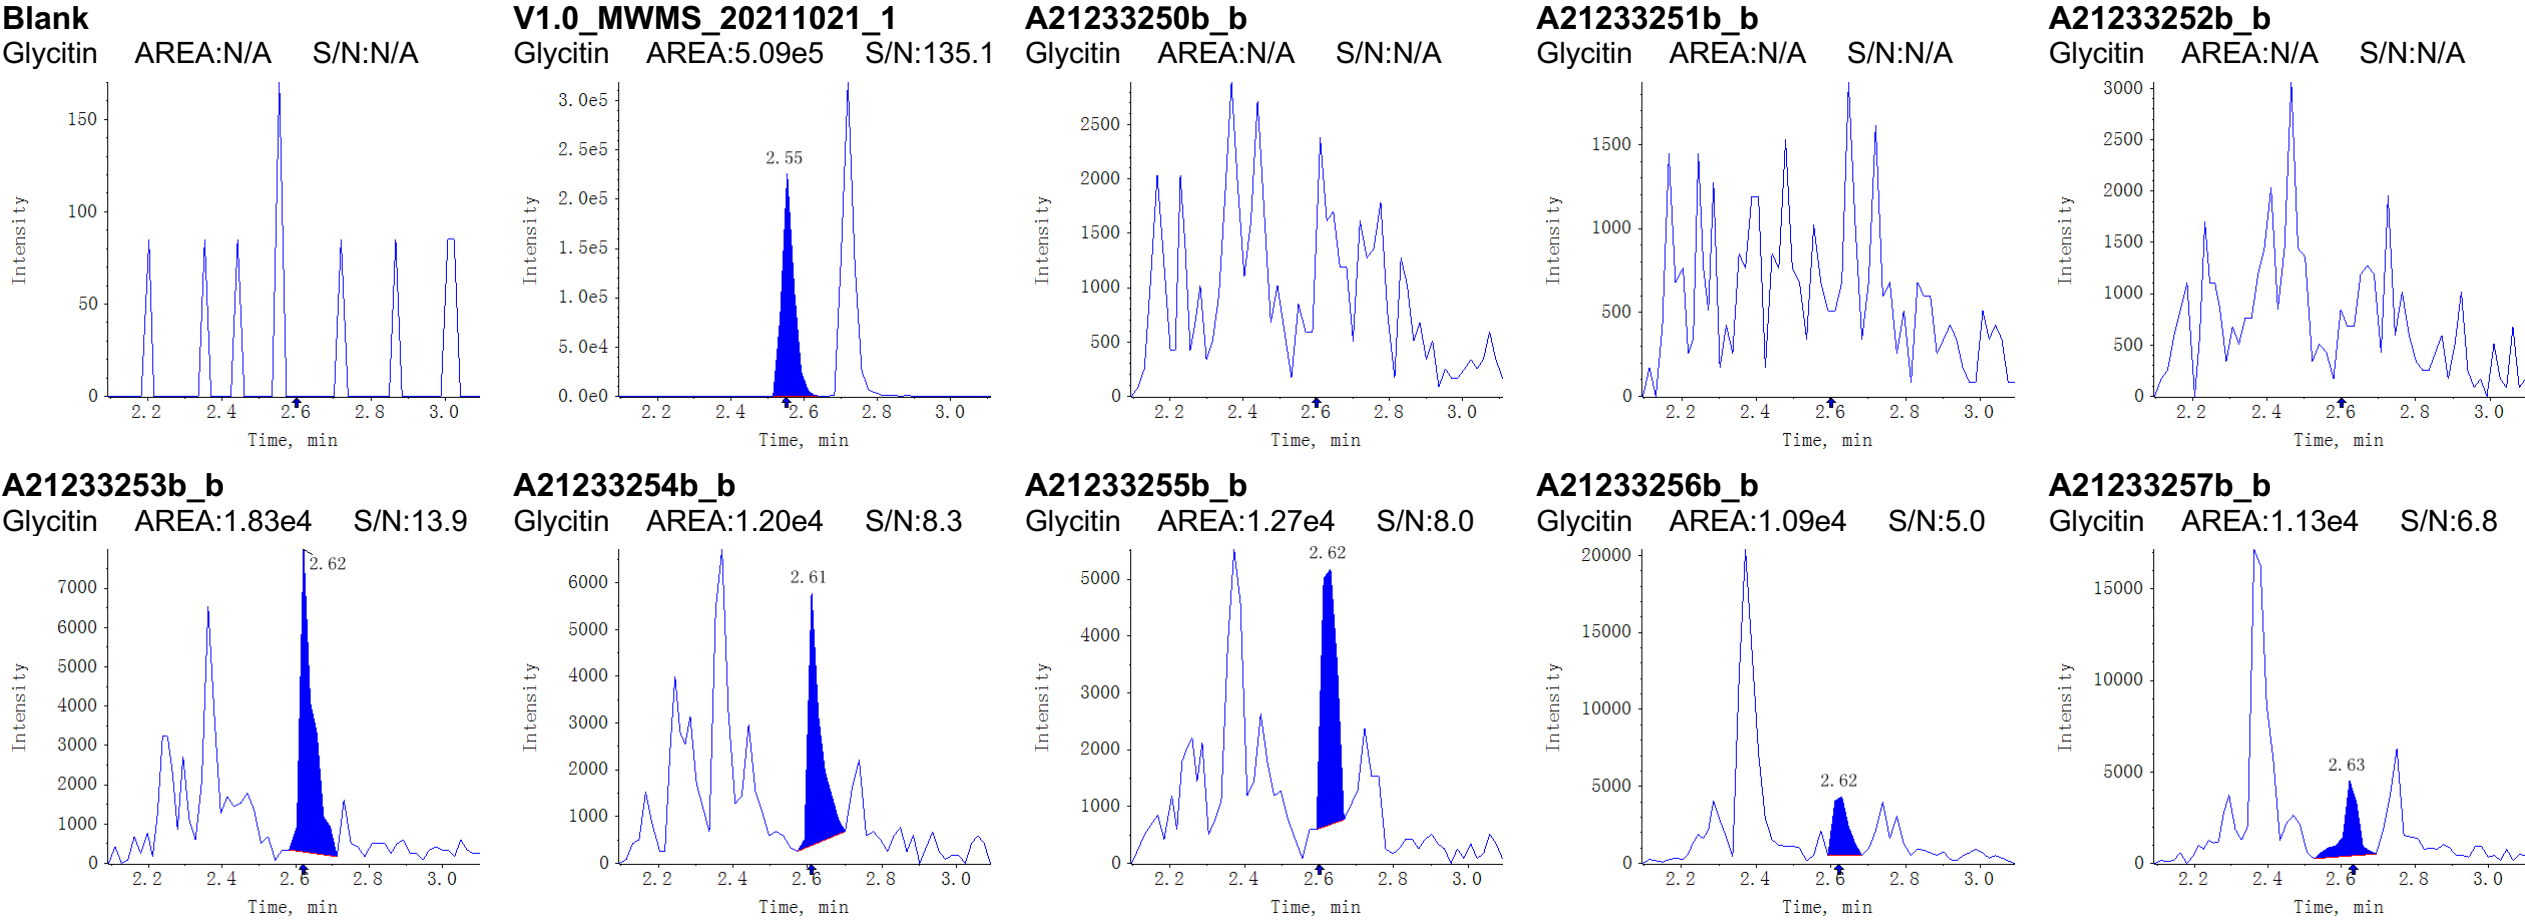

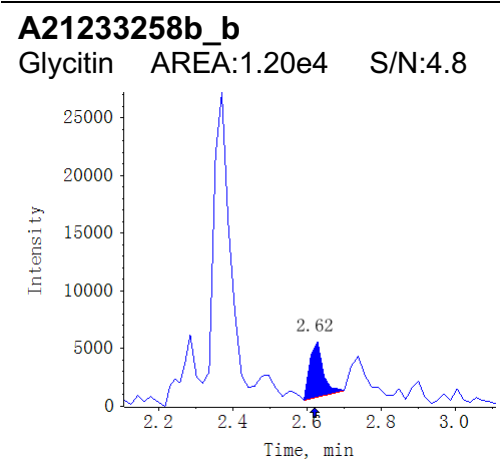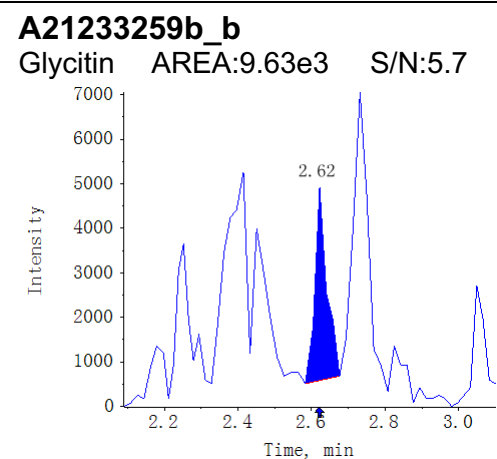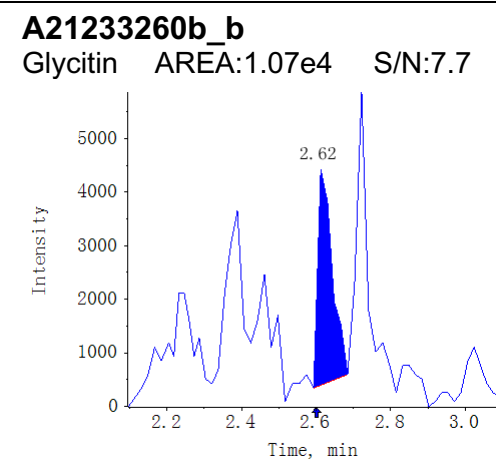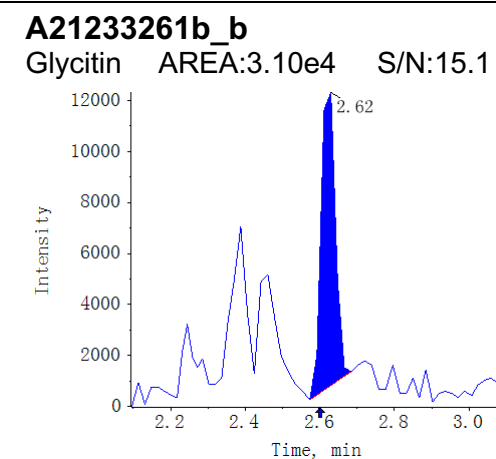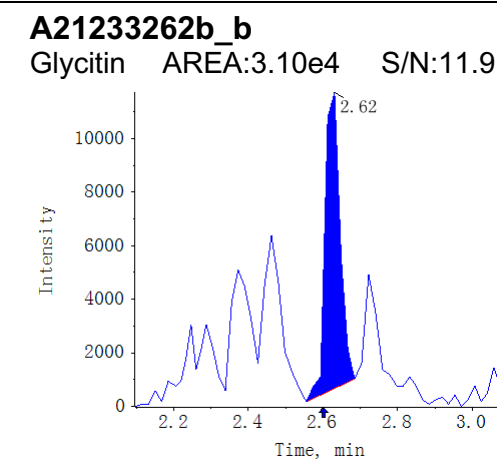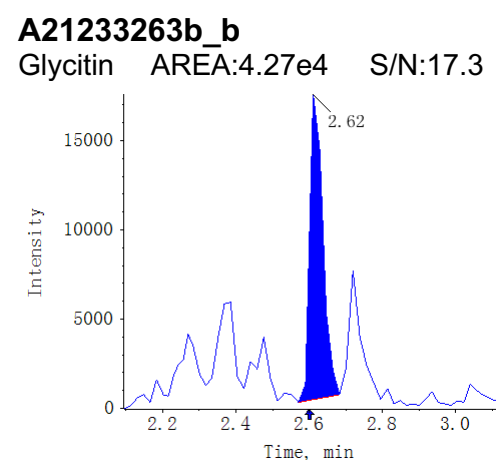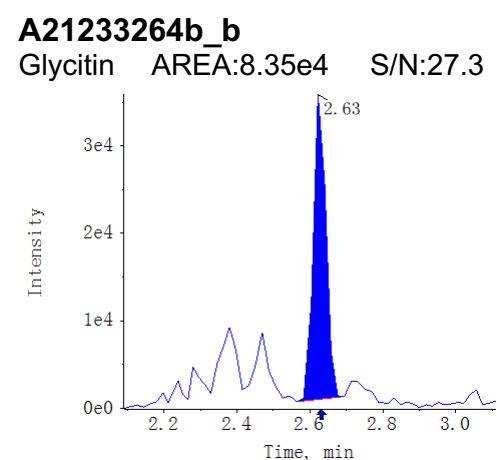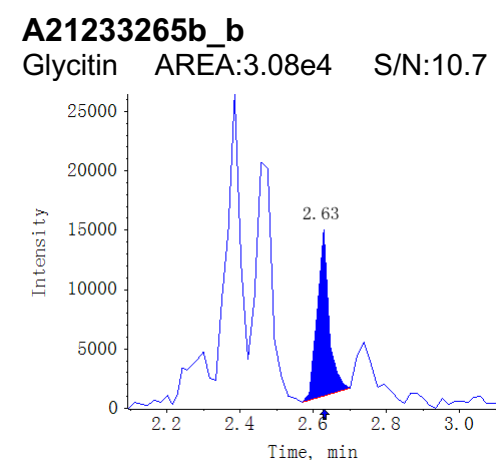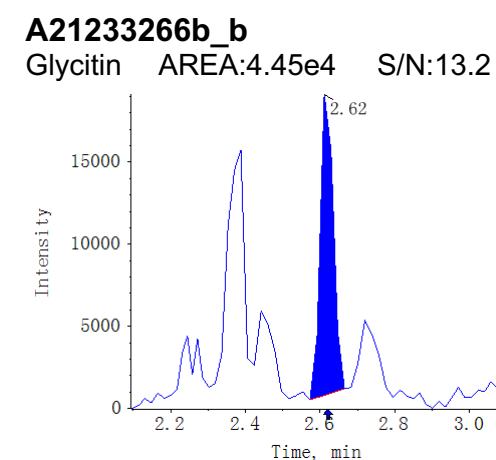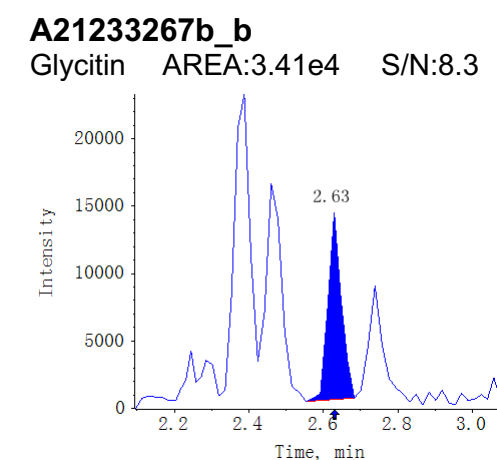

|                    |                                                    |                 |                      |
|--------------------|----------------------------------------------------|-----------------|----------------------|
| Result Table       | MWXS-21-2101D-3_18_WH6500-5_A20-3_V1.0_TY_20211028 | Algorithm Used  | MQ4                  |
| Acquisition Method | Flavonoids_V1.0_WH6500-5_LT_20211025.dam           | Instrument Name | QTRAP 6500+ Low Mass |
| Project            | N/A                                                | Analytes QTY    | 204:128              |

**Compound name: Isomangiferin (421.1 / 301.0)**

| Sample Name           | Sample Type     | Area (cps) | Is Area (cps) | RT (min) | S/N   | Target Conc | Calculated Conc.() |
|-----------------------|-----------------|------------|---------------|----------|-------|-------------|--------------------|
| STD_0.5nM             | Standard        | 4.74e3     | N/A           | 2.32     | 23.8  | 0.5000      | 3.731473e-1        |
| STD_1nM               | Standard        | 9.37e3     | N/A           | 2.31     | 32.3  | 1.0000      | 8.118249e-1        |
| STD_5nM               | Standard        | 7.63e4     | N/A           | 2.31     | 102.0 | 5.0000      | 7.139207e0         |
| STD_10nM              | Standard        | 1.08e5     | N/A           | 2.31     | 115.8 | 10.0000     | 1.011979e1         |
| STD_20nM              | Standard        | 2.12e5     | N/A           | 2.31     | 135.3 | 20.0000     | 2.000826e1         |
| STD_50nM              | Standard        | 5.31e5     | N/A           | 2.31     | 150.7 | 50.0000     | 5.020498e1         |
| STD_100nM             | Standard        | 1.08e6     | N/A           | 2.32     | 144.9 | 100.0000    | 1.016667e2         |
| STD_200nM             | Standard        | 2.07e6     | N/A           | 2.30     | 149.2 | 200.0000    | 1.961761e2         |
| STD_500nM             | Standard        | N/A        | N/A           | N/A      | N/A   | 500.0000    | N/A                |
| STD_1000nM            | Standard        | N/A        | N/A           | N/A      | N/A   | 1000.0000   | N/A                |
| STD_2000nM            | Standard        | N/A        | N/A           | N/A      | N/A   | 2000.0000   | N/A                |
| V1.0_MW_RQC1_20211018 | Quality Control | N/A        | N/A           | N/A      | N/A   | 0.0000      | N/A                |
| Blank                 | Unknown         | N/A        | N/A           | N/A      | N/A   | N/A         | N/A                |
| V1.0_MWMS_20211021_1  | Unknown         | 1.82e6     | N/A           | 2.32     | 157.5 | N/A         | 1.716883e2         |
| MWXS212101D3_R1       | Quality Control | 1.78e6     | N/A           | 2.31     | 145.9 | 0.0000      | 1.678804e2         |
| MWXS212101D3_R2       | Quality Control | 1.84e6     | N/A           | 2.31     | 172.8 | 0.0000      | 1.742429e2         |
| MWXS212101D3_R3       | Quality Control | 1.85e6     | N/A           | 2.31     | 149.6 | 0.0000      | 1.746694e2         |
| A21233250b_b          | Unknown         | 9.00e3     | N/A           | 2.40     | 6.8   | N/A         | 7.765562e-1        |
| A21233251b_b          | Unknown         | 7.71e3     | N/A           | 2.40     | 6.1   | N/A         | 6.544820e-1        |
| A21233252b_b          | Unknown         | 1.17e3     | N/A           | 2.40     | 2.2   | N/A         | 3.567472e-2        |
| A21233253b_b          | Unknown         | 2.57e3     | N/A           | 2.40     | 3.3   | N/A         | 1.680264e-1        |
| A21233254b_b          | Unknown         | 1.64e3     | N/A           | 2.39     | 3.7   | N/A         | 8.060954e-2        |
| A21233255b_b          | Unknown         | 3.62e3     | N/A           | 2.40     | 3.3   | N/A         | 2.675996e-1        |
| A21233256b_b          | Unknown         | 4.04e3     | N/A           | 2.40     | 3.7   | N/A         | 3.074384e-1        |
| A21233257b_b          | Unknown         | 5.90e3     | N/A           | 2.41     | 5.8   | N/A         | 4.832434e-1        |
| A21233258b_b          | Unknown         | 3.08e3     | N/A           | 2.40     | 4.0   | N/A         | 2.165061e-1        |
| A21233259b_b          | Unknown         | 5.94e3     | N/A           | 2.40     | 6.2   | N/A         | 4.871210e-1        |
| A21233260b_b          | Unknown         | 3.37e3     | N/A           | 2.39     | 4.0   | N/A         | 2.437807e-1        |
| A21233261b_b          | Unknown         | 7.86e3     | N/A           | 2.40     | 7.2   | N/A         | 6.685222e-1        |
| A21233262b_b          | Unknown         | 3.76e3     | N/A           | 2.39     | 5.6   | N/A         | 2.810973e-1        |
| A21233263b_b          | Unknown         | 6.83e3     | N/A           | 2.39     | 5.1   | N/A         | 5.708138e-1        |
| A21233264b_b          | Unknown         | 7.06e3     | N/A           | 2.40     | 6.1   | N/A         | 5.933336e-1        |
| A21233265b_b          | Unknown         | 6.05e3     | N/A           | 2.40     | 6.4   | N/A         | 4.975237e-1        |
| A21233266b_b          | Unknown         | 5.60e3     | N/A           | 2.39     | 4.6   | N/A         | 4.551344e-1        |
| A21233267b_b          | Unknown         | 9.63e3     | N/A           | 2.41     | 8.7   | N/A         | 8.362376e-1        |

Compound name: Isomangiferin

Regression Equation:  $y = 10569.52166x + 792.17049$  ( $r = 0.99853$ ) (weighting:  $1/x$ )

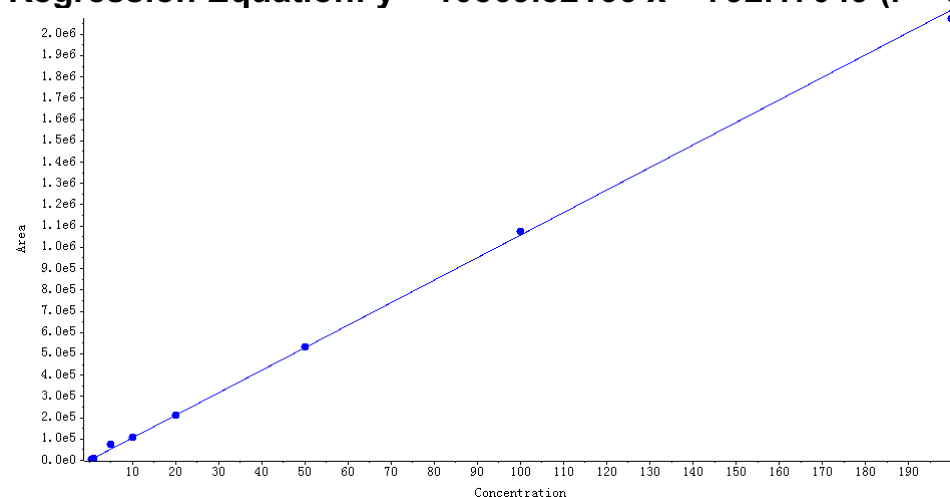

### Peak Review

Blank

Isomangiferin AREA:N/A S/N:N/A

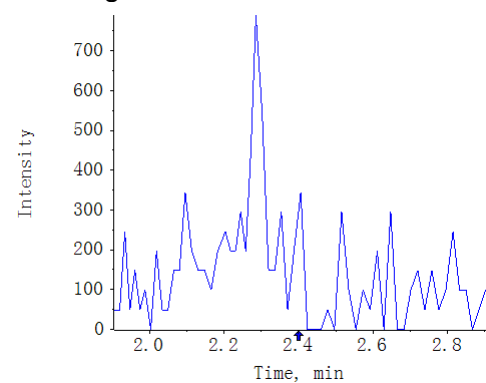

V1.0\_MWMS\_20211021\_1

Isomangiferin AREA:1.82e6 S/N:157.5

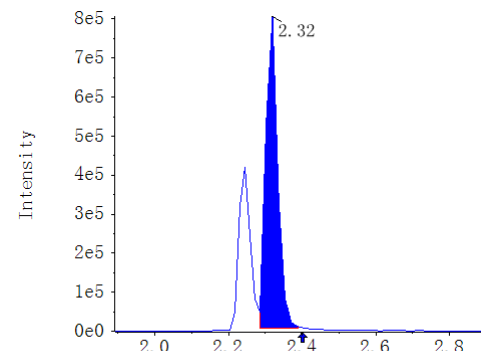

A21233250b\_b

Isomangiferin AREA:9.00e3 S/N:6.8

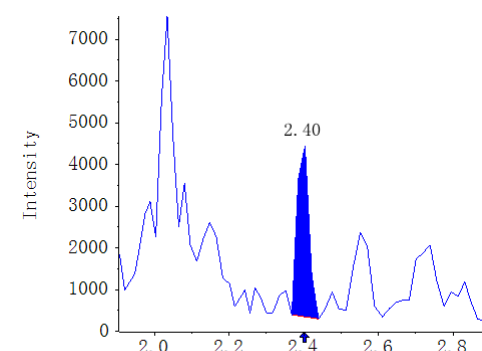

A21233251b\_b

Isomangiferin AREA:7.71e3 S/N:6.1

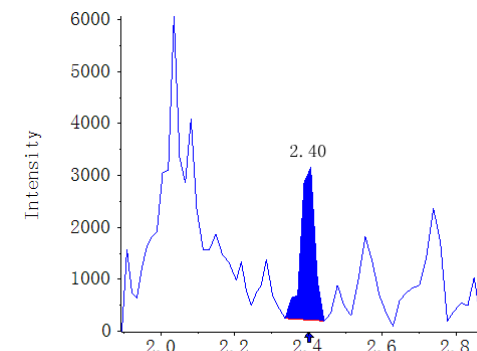

A21233252b\_b

Isomangiferin AREA:1.17e3 S/N:2.2

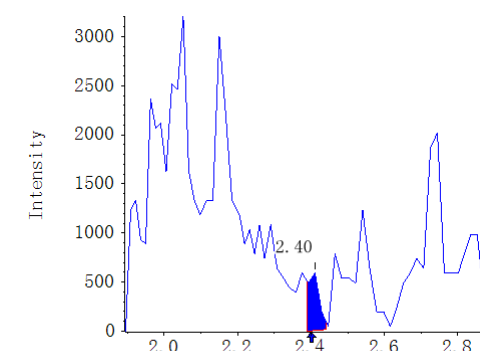

A21233253b\_b

Isomangiferin AREA:2.57e3 S/N:3.3

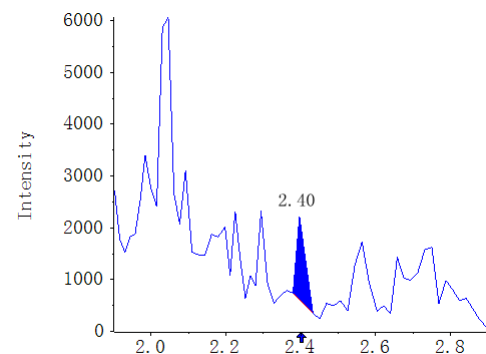

A21233254b\_b

Isomangiferin AREA:1.64e3 S/N:3.7

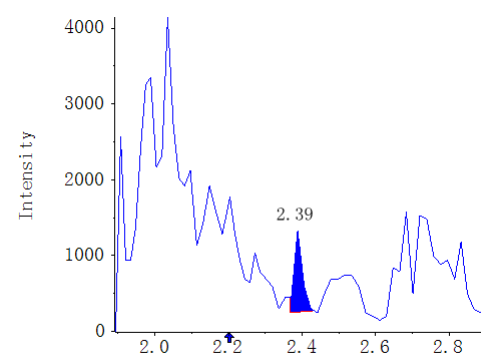

A21233255b\_b

Isomangiferin AREA:3.62e3 S/N:3.3

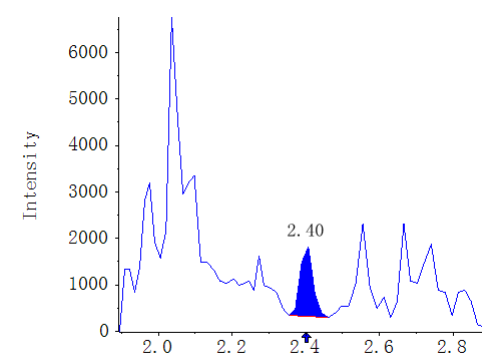

A21233256b\_b

Isomangiferin AREA:4.04e3 S/N:3.7

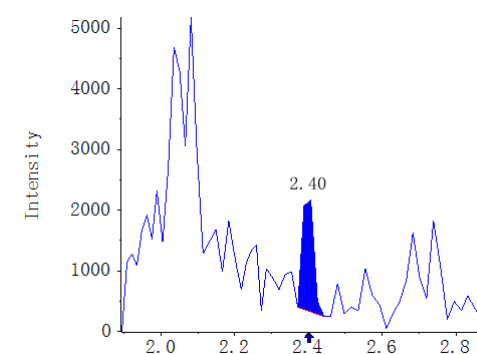

A21233257b\_b

Isomangiferin AREA:5.90e3 S/N:5.8

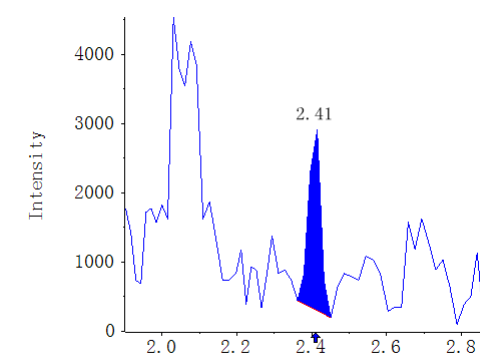

**A21233258b\_b**  
Isomangiferin AREA:3.08e3  
S/N:4.0

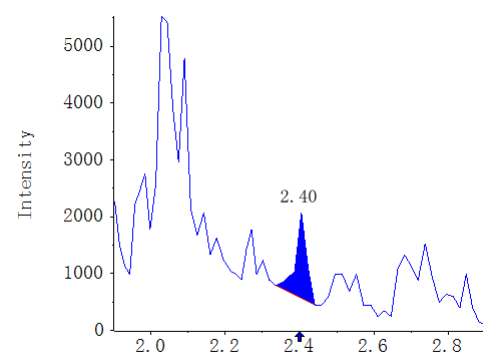

**A21233259b\_b**  
Isomangiferin AREA:5.94e3  
S/N:6.2

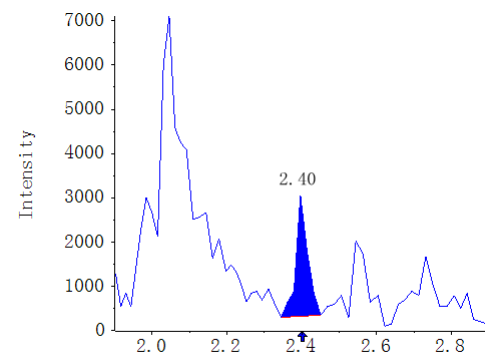

**A21233260b\_b**  
Isomangiferin AREA:3.37e3  
S/N:4.0

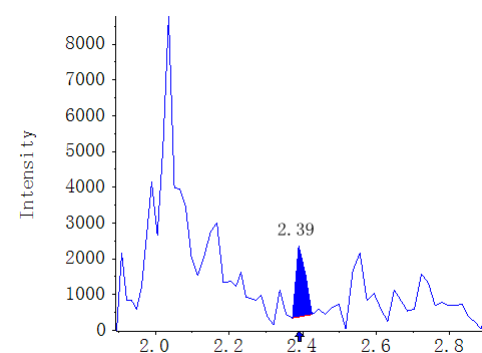

**A21233261b\_b**  
Isomangiferin AREA:7.86e3  
S/N:7.2

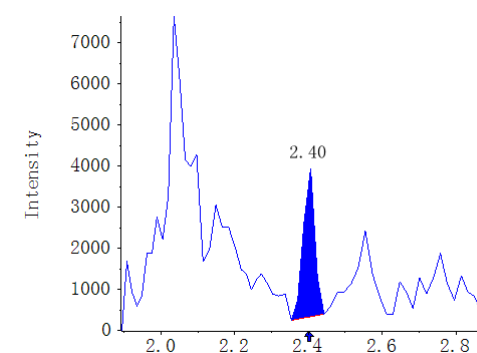

**A21233262b\_b**  
Isomangiferin AREA:3.76e3  
S/N:5.6

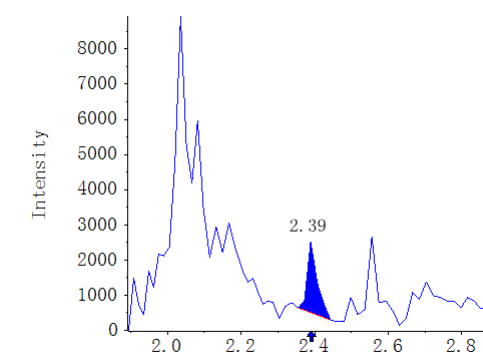

**A21233263b\_b**  
Isomangiferin AREA:6.83e3  
S/N:5.1

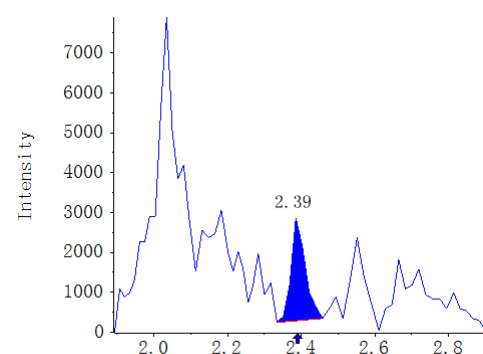

**A21233264b\_b**  
Isomangiferin AREA:7.06e3  
S/N:6.1

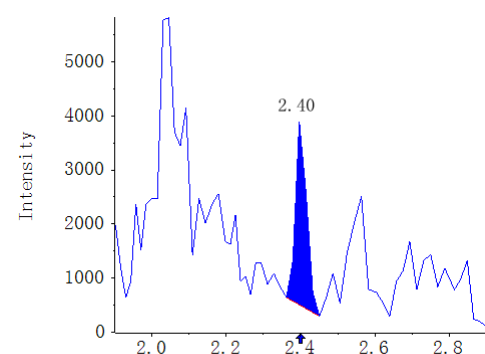

**A21233265b\_b**  
Isomangiferin AREA:6.05e3  
S/N:6.4

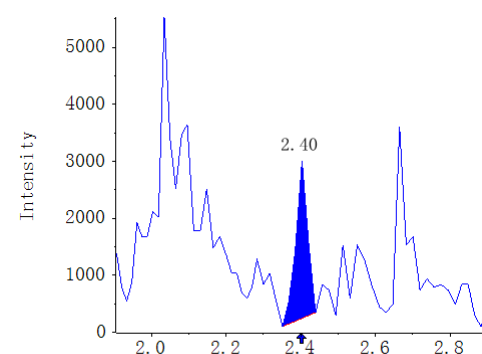

**A21233266b\_b**  
Isomangiferin AREA:5.60e3  
S/N:4.6

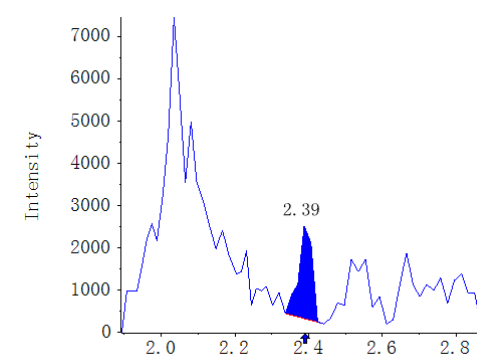

**A21233267b\_b**  
Isomangiferin AREA:9.63e3  
S/N:8.7

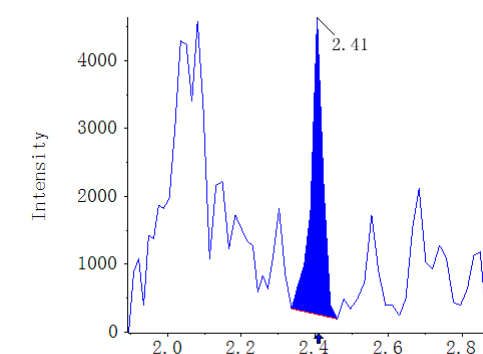

|                    |                                                    |                 |                      |
|--------------------|----------------------------------------------------|-----------------|----------------------|
| Result Table       | MWXS-21-2101D-3_18_WH6500-5_A20-3_V1.0_TY_20211028 | Algorithm Used  | MQ4                  |
| Acquisition Method | Flavonoids_V1.0_WH6500-5_LT_20211025.dam           | Instrument Name | QTRAP 6500+ Low Mass |
| Project            | N/A                                                | Analytes QTY    | 204:131              |

**Compound name: Apigenin 7-glucoside (431.1 / 268.0)**

| Sample Name           | Sample Type     | Area (cps) | Is Area (cps) | RT (min) | S/N   | Target Conc | Calculated Conc.() |
|-----------------------|-----------------|------------|---------------|----------|-------|-------------|--------------------|
| STD_0.5nM             | Standard        | 5.28e3     | N/A           | 3.07     | 27.8  | 0.5000      | 3.125393e-1        |
| STD_1nM               | Standard        | 1.20e4     | N/A           | 3.06     | 32.7  | 1.0000      | 9.837439e-1        |
| STD_5nM               | Standard        | 7.02e4     | N/A           | 3.07     | 66.3  | 5.0000      | 6.835246e0         |
| STD_10nM              | Standard        | 9.70e4     | N/A           | 3.07     | 122.1 | 10.0000     | 9.527789e0         |
| STD_20nM              | Standard        | 2.08e5     | N/A           | 3.06     | 119.5 | 20.0000     | 2.064892e1         |
| STD_50nM              | Standard        | 5.33e5     | N/A           | 3.07     | 100.8 | 50.0000     | 5.336594e1         |
| STD_100nM             | Standard        | 9.92e5     | N/A           | 3.07     | 96.9  | 100.0000    | 9.949110e1         |
| STD_200nM             | Standard        | 1.95e6     | N/A           | 3.06     | 123.0 | 200.0000    | 1.953347e2         |
| STD_500nM             | Standard        | N/A        | N/A           | N/A      | N/A   | 500.0000    | N/A                |
| STD_1000nM            | Standard        | N/A        | N/A           | N/A      | N/A   | 1000.0000   | N/A                |
| STD_2000nM            | Standard        | N/A        | N/A           | N/A      | N/A   | 2000.0000   | N/A                |
| V1.0_MW_RQC1_20211018 | Quality Control | 3.37e6     | N/A           | 3.06     | 168.3 | 0.0000      | 3.383757e2         |
| Blank                 | Unknown         | N/A        | N/A           | N/A      | N/A   | N/A         | N/A                |
| V1.0_MWMS_20211021_1  | Unknown         | 1.65e6     | N/A           | 3.08     | 127.1 | N/A         | 1.656165e2         |
| MWXS212101D3_R1       | Quality Control | 1.70e6     | N/A           | 3.08     | 106.0 | 0.0000      | 1.702638e2         |
| MWXS212101D3_R2       | Quality Control | 1.62e6     | N/A           | 3.08     | 127.7 | 0.0000      | 1.624150e2         |
| MWXS212101D3_R3       | Quality Control | 1.66e6     | N/A           | 3.08     | 129.0 | 0.0000      | 1.670893e2         |
| A21233250b_b          | Unknown         | N/A        | N/A           | N/A      | N/A   | N/A         | N/A                |
| A21233251b_b          | Unknown         | N/A        | N/A           | N/A      | N/A   | N/A         | N/A                |
| A21233252b_b          | Unknown         | N/A        | N/A           | N/A      | N/A   | N/A         | N/A                |
| A21233253b_b          | Unknown         | N/A        | N/A           | N/A      | N/A   | N/A         | N/A                |
| A21233254b_b          | Unknown         | N/A        | N/A           | N/A      | N/A   | N/A         | N/A                |
| A21233255b_b          | Unknown         | N/A        | N/A           | N/A      | N/A   | N/A         | N/A                |
| A21233256b_b          | Unknown         | 1.65e4     | N/A           | 3.08     | 6.7   | N/A         | 1.440254e0         |
| A21233257b_b          | Unknown         | N/A        | N/A           | N/A      | N/A   | N/A         | N/A                |
| A21233258b_b          | Unknown         | 1.81e4     | N/A           | 3.08     | 12.6  | N/A         | 1.604016e0         |
| A21233259b_b          | Unknown         | N/A        | N/A           | N/A      | N/A   | N/A         | N/A                |
| A21233260b_b          | Unknown         | N/A        | N/A           | N/A      | N/A   | N/A         | N/A                |
| A21233261b_b          | Unknown         | N/A        | N/A           | N/A      | N/A   | N/A         | N/A                |
| A21233262b_b          | Unknown         | N/A        | N/A           | N/A      | N/A   | N/A         | N/A                |
| A21233263b_b          | Unknown         | N/A        | N/A           | N/A      | N/A   | N/A         | N/A                |
| A21233264b_b          | Unknown         | N/A        | N/A           | N/A      | N/A   | N/A         | N/A                |
| A21233265b_b          | Unknown         | 2.06e4     | N/A           | 3.08     | 6.4   | N/A         | 1.850455e0         |
| A21233266b_b          | Unknown         | 8.74e3     | N/A           | 3.07     | 5.8   | N/A         | 6.601395e-1        |
| A21233267b_b          | Unknown         | 1.34e4     | N/A           | 3.09     | 4.7   | N/A         | 1.123645e0         |

Compound name: Apigenin 7-glucoside  
Regression Equation:  $y = 9951.59186x + 2168.77254$  ( $r = 0.99847$ ) (weighting:  $1/x$ )

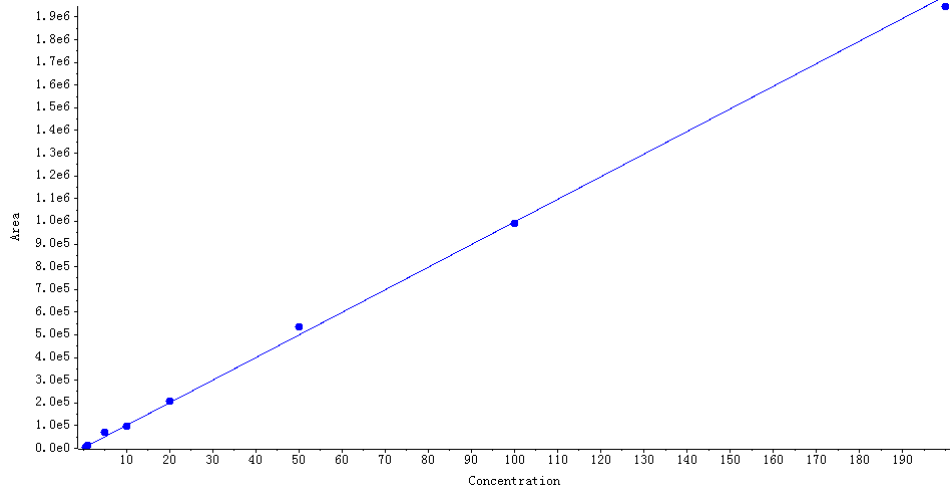

Peak Review

Blank  
Apigenin 7-glucoside AREA:N/A  
S/N:N/A

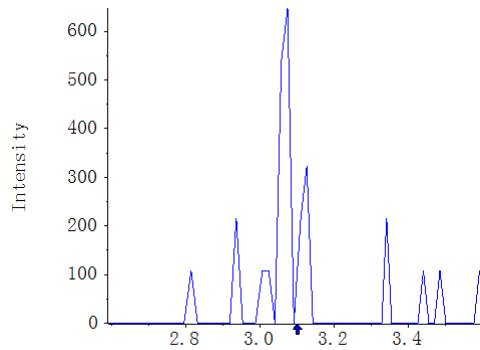

V1.0\_MWMS\_20211021\_1  
Apigenin 7-glucoside AREA:1.65e6  
S/N:127.1

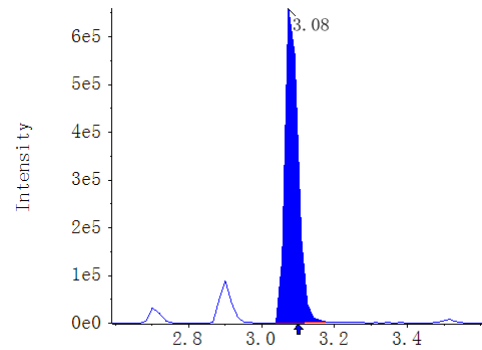

A21233250b\_b  
Apigenin 7-glucoside AREA:N/A  
S/N:N/A

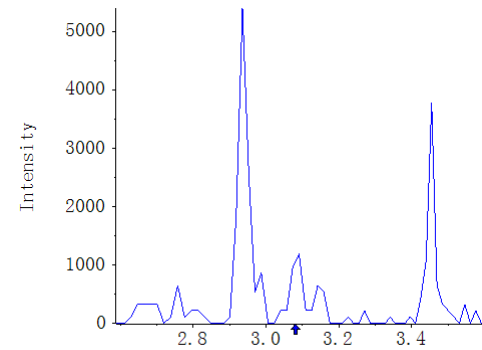

A21233251b\_b  
Apigenin 7-glucoside AREA:N/A  
S/N:N/A

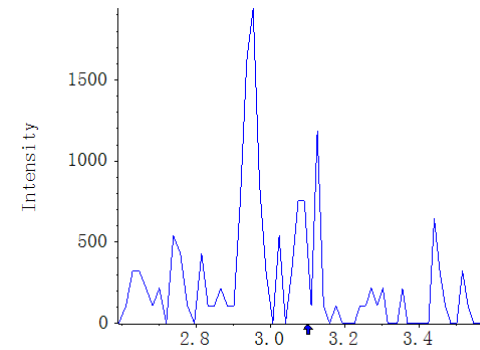

A21233252b\_b  
Apigenin 7-glucoside AREA:N/A  
S/N:N/A

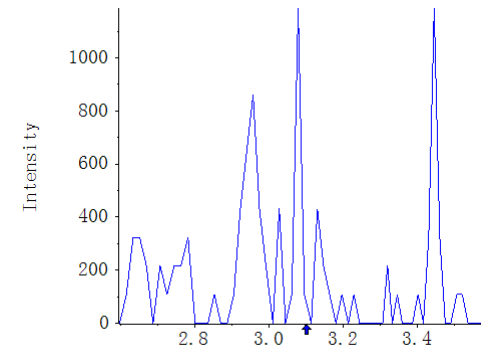

A21233253b\_b  
Apigenin 7-glucoside AREA:N/A  
S/N:N/A

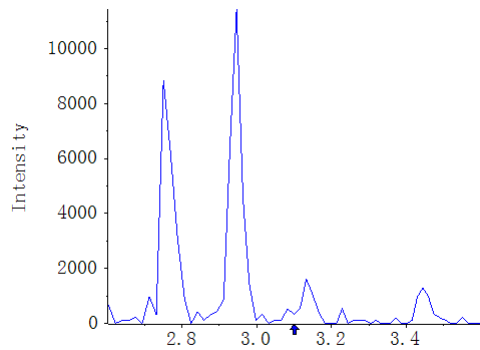

A21233254b\_b  
Apigenin 7-glucoside AREA:N/A  
S/N:N/A

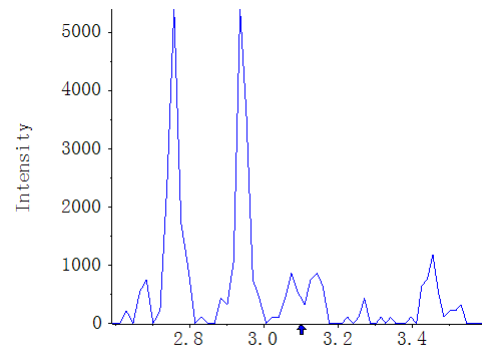

A21233255b\_b  
Apigenin 7-glucoside AREA:N/A  
S/N:N/A

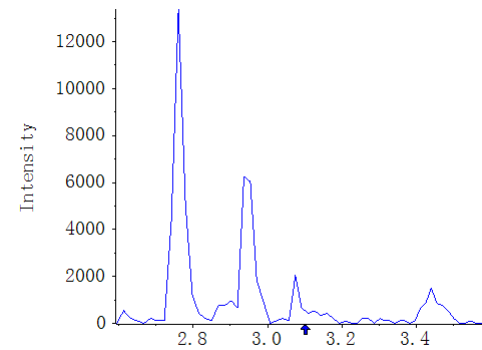

A21233256b\_b  
Apigenin 7-glucoside AREA:1.65e4  
S/N:6.7

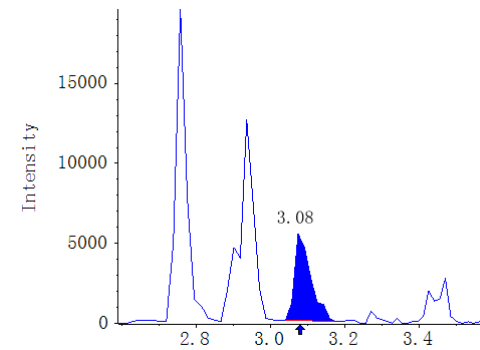

A21233257b\_b  
Apigenin 7-glucoside AREA:N/A  
S/N:N/A

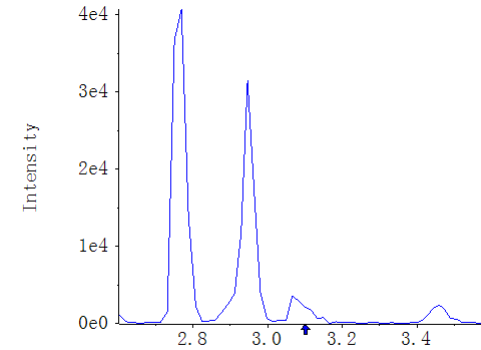

**A21233258b\_b**

Apigenin 7-glucoside AREA:1.81e4  
S/N:12.6

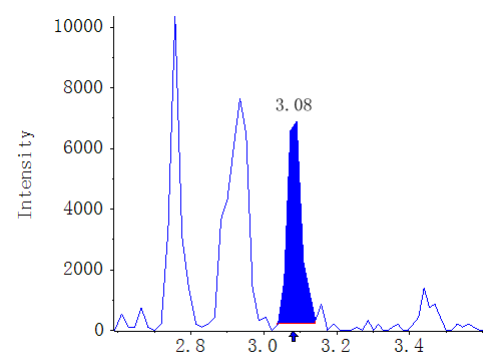

**A21233259b\_b**

Apigenin 7-glucoside AREA:N/A  
S/N:N/A

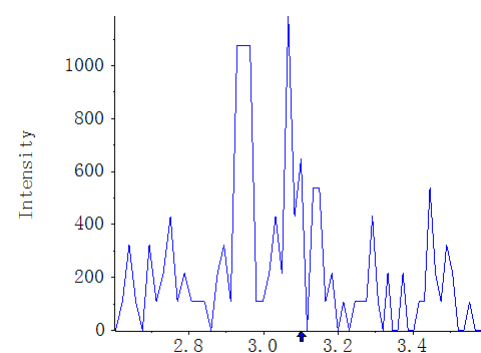

**A21233260b\_b**

Apigenin 7-glucoside AREA:N/A  
S/N:N/A

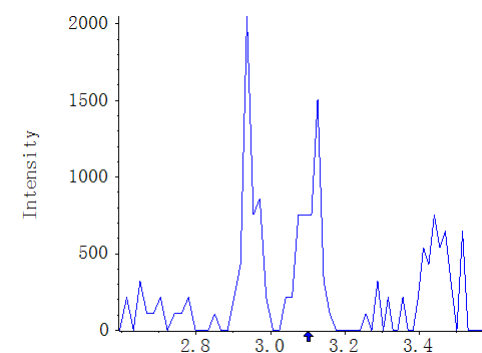

**A21233261b\_b**

Apigenin 7-glucoside AREA:N/A  
S/N:N/A

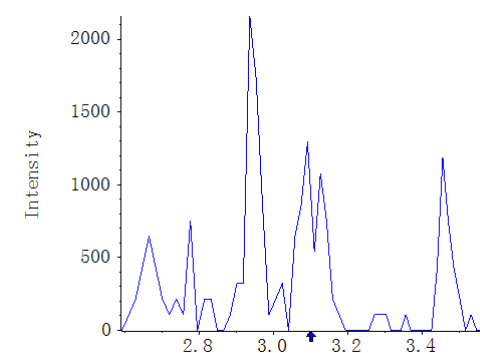

**A21233262b\_b**

Apigenin 7-glucoside AREA:N/A  
S/N:N/A

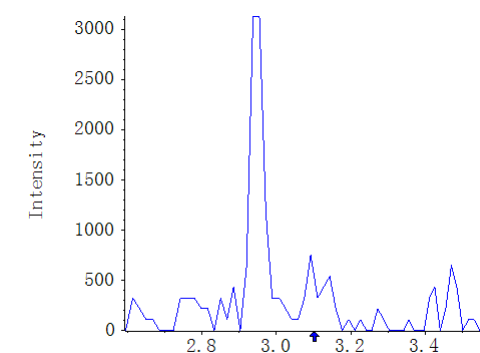

**A21233263b\_b**

Apigenin 7-glucoside AREA:N/A  
S/N:N/A

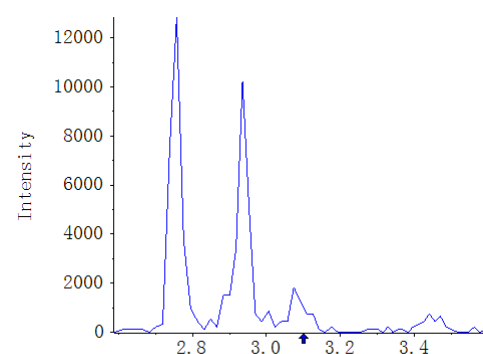

**A21233264b\_b**

Apigenin 7-glucoside AREA:N/A  
S/N:N/A

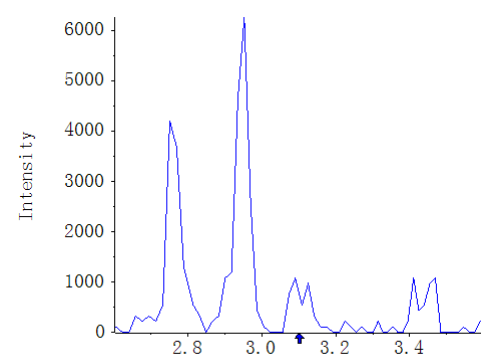

**A21233265b\_b**

Apigenin 7-glucoside AREA:2.06e4  
S/N:6.4

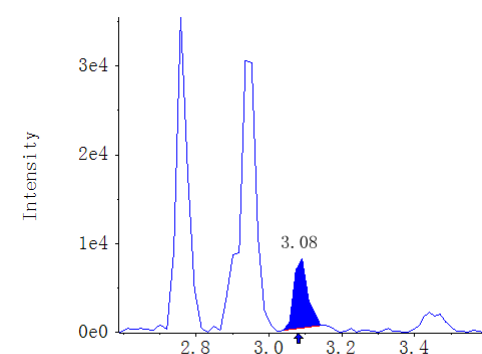

**A21233266b\_b**

Apigenin 7-glucoside AREA:8.74e3  
S/N:5.8

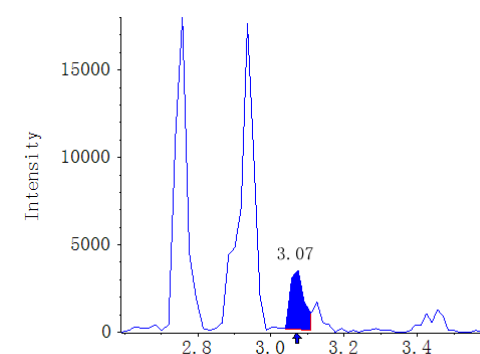

**A21233267b\_b**

Apigenin 7-glucoside AREA:1.34e4  
S/N:4.7

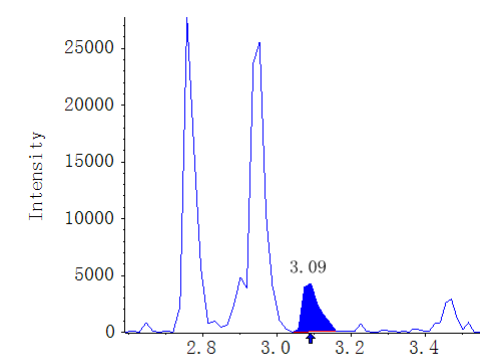

|                    |                                                    |                 |                      |
|--------------------|----------------------------------------------------|-----------------|----------------------|
| Result Table       | MWXS-21-2101D-3_18_WH6500-5_A20-3_V1.0_TY_20211028 | Algorithm Used  | MQ4                  |
| Acquisition Method | Flavonoids_V1.0_WH6500-5_LT_20211025.dam           | Instrument Name | QTRAP 6500+ Low Mass |
| Project            | N/A                                                | Analytes QTY    | 204:137              |

**Compound name: Quercetin 3-O-(6"-galloyl)-β-D-galactopyranoside (615.1 / 463.1)**

| Sample Name           | Sample Type     | Area (cps) | Is Area (cps) | RT (min) | S/N   | Target Conc | Calculated Conc.() |
|-----------------------|-----------------|------------|---------------|----------|-------|-------------|--------------------|
| STD_0.5nM             | Standard        | 3.32e3     | N/A           | 2.62     | 20.9  | 0.5000      | 5.157168e-1        |
| STD_1nM               | Standard        | 4.24e3     | N/A           | 2.62     | 22.3  | 1.0000      | 6.547170e-1        |
| STD_5nM               | Standard        | 4.75e4     | N/A           | 2.61     | 134.0 | 5.0000      | 7.185440e0         |
| STD_10nM              | Standard        | 6.51e4     | N/A           | 2.61     | 141.3 | 10.0000     | 9.839159e0         |
| STD_20nM              | Standard        | 1.20e5     | N/A           | 2.61     | 230.5 | 20.0000     | 1.806653e1         |
| STD_50nM              | Standard        | 3.36e5     | N/A           | 2.62     | 269.6 | 50.0000     | 5.070522e1         |
| STD_100nM             | Standard        | 6.33e5     | N/A           | 2.62     | 258.4 | 100.0000    | 9.554966e1         |
| STD_200nM             | Standard        | 1.35e6     | N/A           | 2.61     | 337.4 | 200.0000    | 2.039835e2         |
| STD_500nM             | Standard        | N/A        | N/A           | N/A      | N/A   | 500.0000    | N/A                |
| STD_1000nM            | Standard        | N/A        | N/A           | N/A      | N/A   | 1000.0000   | N/A                |
| STD_2000nM            | Standard        | N/A        | N/A           | N/A      | N/A   | 2000.0000   | N/A                |
| V1.0_MW_RQC1_20211018 | Quality Control | 5.19e3     | N/A           | 2.61     | 9.4   | 0.0000      | 7.973028e-1        |
| Blank                 | Unknown         | N/A        | N/A           | N/A      | N/A   | N/A         | N/A                |
| V1.0_MWMS_20211021_1  | Unknown         | 1.19e6     | N/A           | 2.62     | 293.0 | N/A         | 1.796550e2         |
| MWXS212101D3_R1       | Quality Control | 1.19e6     | N/A           | 2.61     | 290.5 | 0.0000      | 1.796615e2         |
| MWXS212101D3_R2       | Quality Control | 1.11e6     | N/A           | 2.62     | 247.3 | 0.0000      | 1.675930e2         |
| MWXS212101D3_R3       | Quality Control | 1.20e6     | N/A           | 2.62     | 242.5 | 0.0000      | 1.818460e2         |
| A21233250b_b          | Unknown         | 3.53e3     | N/A           | 2.62     | 16.4  | N/A         | 5.476120e-1        |
| A21233251b_b          | Unknown         | N/A        | N/A           | N/A      | N/A   | N/A         | N/A                |
| A21233252b_b          | Unknown         | N/A        | N/A           | N/A      | N/A   | N/A         | N/A                |
| A21233253b_b          | Unknown         | N/A        | N/A           | N/A      | N/A   | N/A         | N/A                |
| A21233254b_b          | Unknown         | N/A        | N/A           | N/A      | N/A   | N/A         | N/A                |
| A21233255b_b          | Unknown         | N/A        | N/A           | N/A      | N/A   | N/A         | N/A                |
| A21233256b_b          | Unknown         | N/A        | N/A           | N/A      | N/A   | N/A         | N/A                |
| A21233257b_b          | Unknown         | N/A        | N/A           | N/A      | N/A   | N/A         | N/A                |
| A21233258b_b          | Unknown         | N/A        | N/A           | N/A      | N/A   | N/A         | N/A                |
| A21233259b_b          | Unknown         | N/A        | N/A           | N/A      | N/A   | N/A         | N/A                |
| A21233260b_b          | Unknown         | N/A        | N/A           | N/A      | N/A   | N/A         | N/A                |
| A21233261b_b          | Unknown         | N/A        | N/A           | N/A      | N/A   | N/A         | N/A                |
| A21233262b_b          | Unknown         | N/A        | N/A           | N/A      | N/A   | N/A         | N/A                |
| A21233263b_b          | Unknown         | N/A        | N/A           | N/A      | N/A   | N/A         | N/A                |
| A21233264b_b          | Unknown         | N/A        | N/A           | N/A      | N/A   | N/A         | N/A                |
| A21233265b_b          | Unknown         | N/A        | N/A           | N/A      | N/A   | N/A         | N/A                |
| A21233266b_b          | Unknown         | N/A        | N/A           | N/A      | N/A   | N/A         | N/A                |
| A21233267b_b          | Unknown         | N/A        | N/A           | N/A      | N/A   | N/A         | N/A                |

Compound name: Quercetin 3-O-(6"-galloyl)-β-D-galactopyranoside  
Regression Equation:  $y = 6624.18579x - 95.36664$  ( $r = 0.99790$ ) (weighting:  $1/x$ )

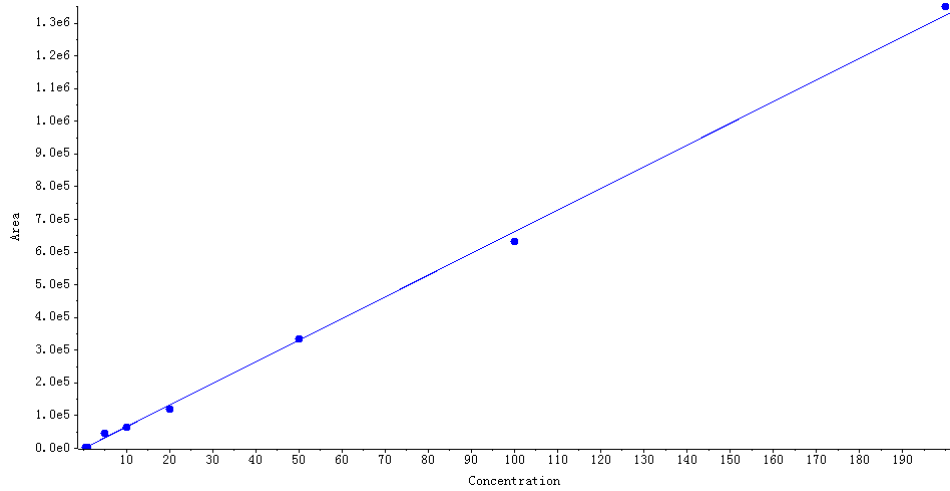

Peak Review

Blank  
Quercetin 3-O-(6"-galloyl)- β -D-  
galactopyranoside AREA:N/A  
S/N:N/A

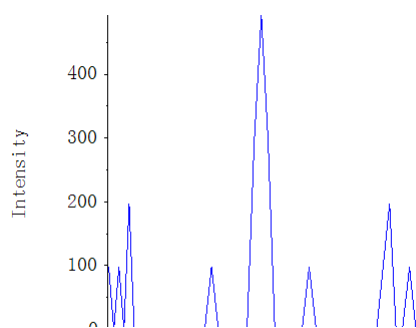

V1.0\_MWMS\_20211021\_1  
Quercetin 3-O-(6"-galloyl)- β -D-  
galactopyranoside AREA:1.19e6  
S/N:293.0

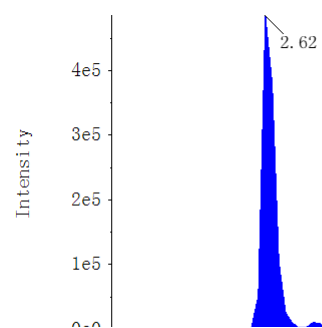

A21233250b\_b  
Quercetin 3-O-(6"-galloyl)- β -D-  
galactopyranoside AREA:3.53e3  
S/N:16.4

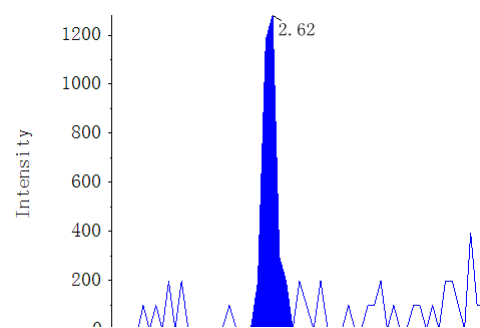

A21233251b\_b  
Quercetin 3-O-(6"-galloyl)- β -D-  
galactopyranoside AREA:N/A  
S/N:N/A

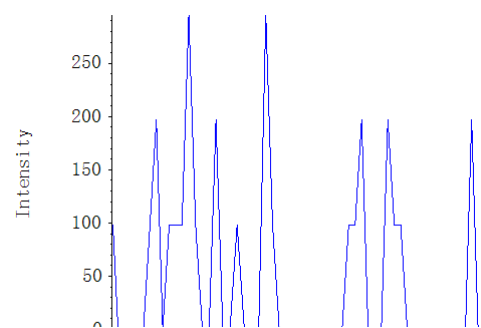

A21233252b\_b  
Quercetin 3-O-(6"-galloyl)- β -D-  
galactopyranoside AREA:N/A  
S/N:N/A

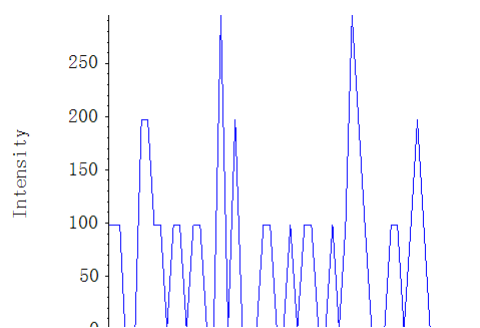

A21233253b\_b  
Quercetin 3-O-(6"-galloyl)- β -D-  
galactopyranoside AREA:N/A  
S/N:N/A

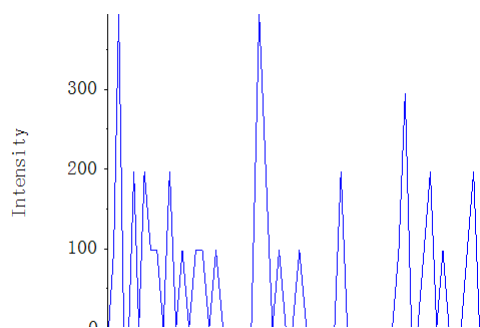

A21233254b\_b  
Quercetin 3-O-(6"-galloyl)- β -D-  
galactopyranoside AREA:N/A  
S/N:N/A

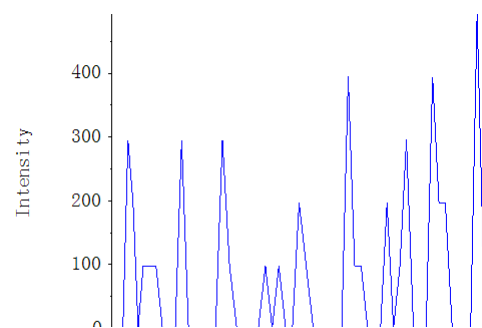

A21233255b\_b  
Quercetin 3-O-(6"-galloyl)- β -D-  
galactopyranoside AREA:N/A  
S/N:N/A

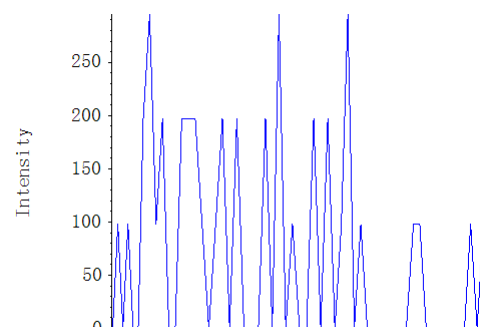

A21233256b\_b  
Quercetin 3-O-(6"-galloyl)- β -D-  
galactopyranoside AREA:N/A  
S/N:N/A

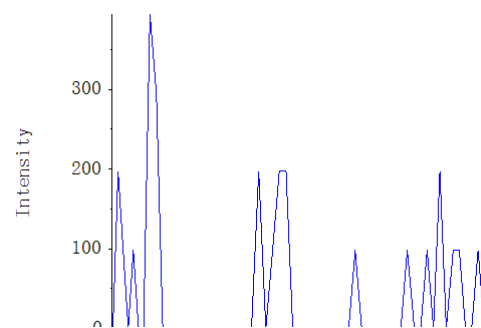

A21233257b\_b  
Quercetin 3-O-(6"-galloyl)- β -D-  
galactopyranoside AREA:N/A  
S/N:N/A

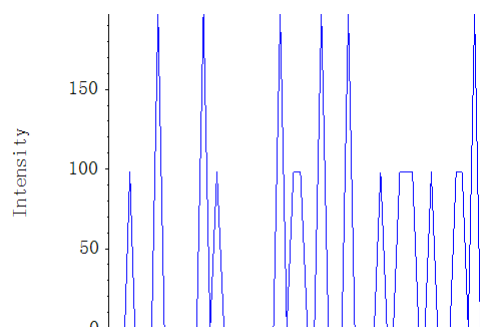

**A21233258b\_b**

Quercetin 3-O-(6"-galloyl)- $\beta$ -D-galactopyranoside AREA:N/A  
S/N:N/A

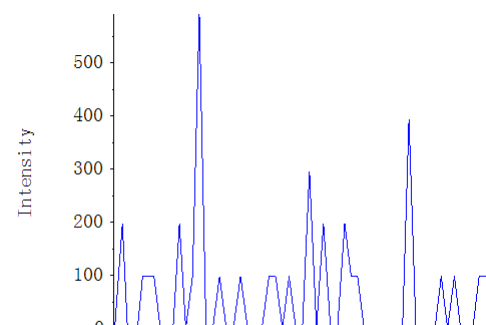

**A21233259b\_b**

Quercetin 3-O-(6"-galloyl)- $\beta$ -D-galactopyranoside AREA:N/A  
S/N:N/A

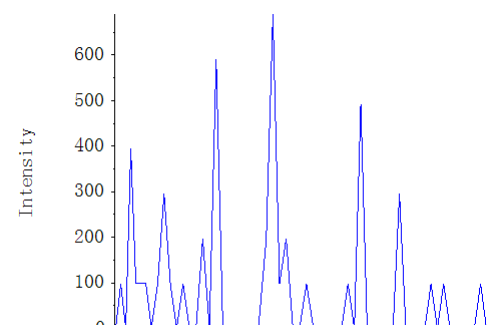

**A21233260b\_b**

Quercetin 3-O-(6"-galloyl)- $\beta$ -D-galactopyranoside AREA:N/A  
S/N:N/A

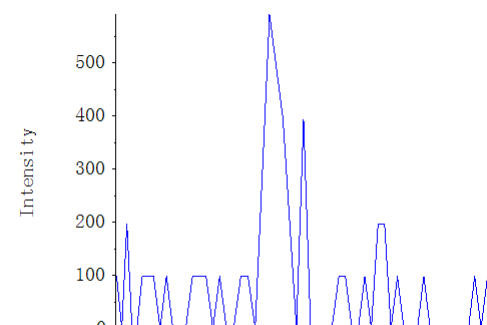

**A21233261b\_b**

Quercetin 3-O-(6"-galloyl)- $\beta$ -D-galactopyranoside AREA:N/A  
S/N:N/A

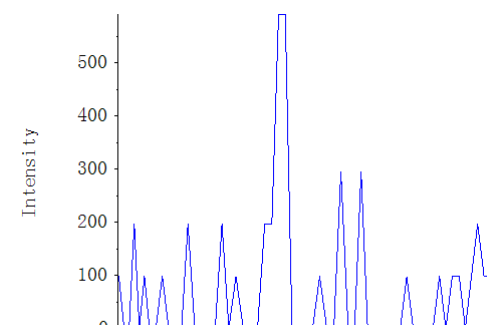

**A21233262b\_b**

Quercetin 3-O-(6"-galloyl)- $\beta$ -D-galactopyranoside AREA:N/A  
S/N:N/A

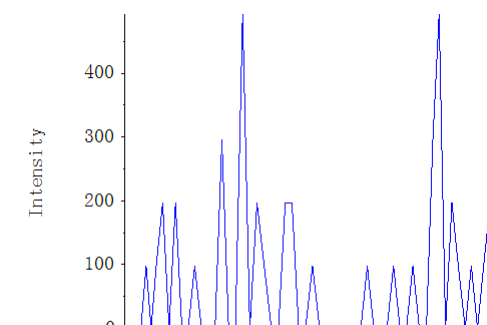

**A21233263b\_b**

Quercetin 3-O-(6"-galloyl)- $\beta$ -D-galactopyranoside AREA:N/A  
S/N:N/A

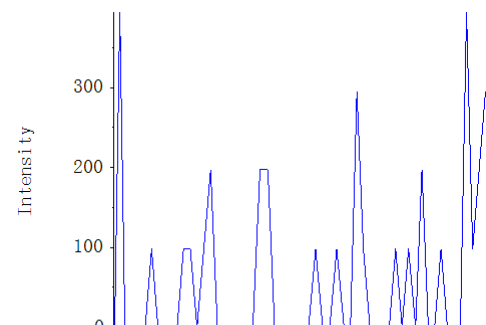

**A21233264b\_b**

Quercetin 3-O-(6"-galloyl)- $\beta$ -D-galactopyranoside AREA:N/A  
S/N:N/A

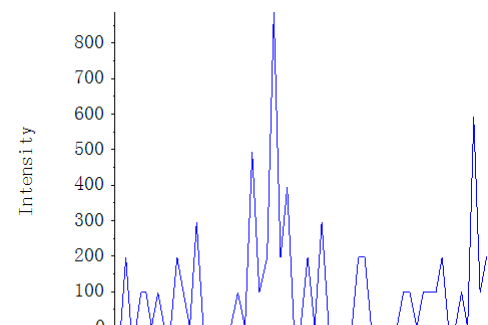

**A21233265b\_b**

Quercetin 3-O-(6"-galloyl)- $\beta$ -D-galactopyranoside AREA:N/A  
S/N:N/A

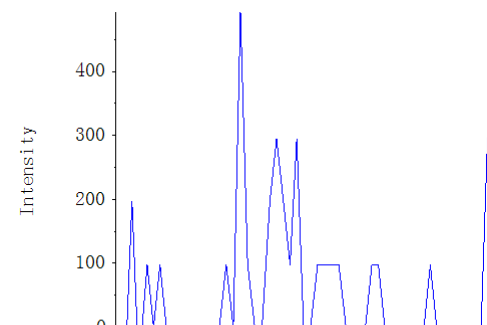

**A21233266b\_b**

Quercetin 3-O-(6"-galloyl)- $\beta$ -D-galactopyranoside AREA:N/A  
S/N:N/A

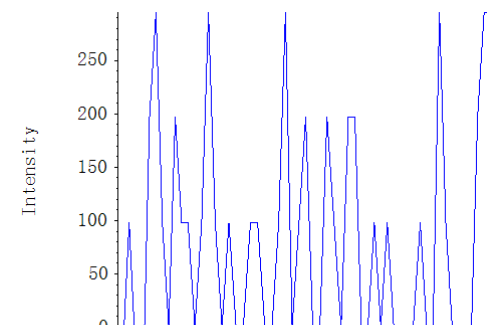

**A21233267b\_b**

Quercetin 3-O-(6"-galloyl)- $\beta$ -D-galactopyranoside AREA:N/A  
S/N:N/A

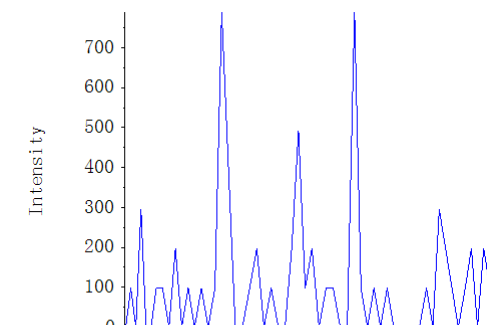

|                    |                                                    |                 |                      |
|--------------------|----------------------------------------------------|-----------------|----------------------|
| Result Table       | MWXS-21-2101D-3_18_WH6500-5_A20-3_V1.0_TY_20211028 | Algorithm Used  | MQ4                  |
| Acquisition Method | Flavonoids_V1.0_WH6500-5_LT_20211025.dam           | Instrument Name | QTRAP 6500+ Low Mass |
| Project            | N/A                                                | Analytes QTY    | 204:143              |

**Compound name: Naringenin-7-glucoside (433.1 / 271.1)**

| Sample Name           | Sample Type     | Area (cps) | Is Area (cps) | RT (min) | S/N   | Target Conc | Calculated Conc.() |
|-----------------------|-----------------|------------|---------------|----------|-------|-------------|--------------------|
| STD_0.5nM             | Standard        | 3.38e3     | N/A           | 3.12     | 13.1  | 0.5000      | 3.574036e-1        |
| STD_1nM               | Standard        | 8.89e3     | N/A           | 3.11     | 24.9  | 1.0000      | 9.909569e-1        |
| STD_5nM               | Standard        | 6.02e4     | N/A           | 3.11     | 87.2  | 5.0000      | 6.889699e0         |
| STD_10nM              | Standard        | 8.14e4     | N/A           | 3.11     | 99.3  | 10.0000     | 9.327238e0         |
| STD_20nM              | Standard        | 1.75e5     | N/A           | 3.11     | 141.8 | 20.0000     | 2.003827e1         |
| STD_50nM              | Standard        | 4.35e5     | N/A           | 3.11     | 138.5 | 50.0000     | 5.001533e1         |
| STD_100nM             | Standard        | 8.48e5     | N/A           | 3.12     | 157.3 | 100.0000    | 9.738928e1         |
| STD_200nM             | Standard        | 1.75e6     | N/A           | 3.11     | 147.6 | 200.0000    | 2.014918e2         |
| STD_500nM             | Standard        | N/A        | N/A           | N/A      | N/A   | 500.0000    | N/A                |
| STD_1000nM            | Standard        | N/A        | N/A           | N/A      | N/A   | 1000.0000   | N/A                |
| STD_2000nM            | Standard        | N/A        | N/A           | N/A      | N/A   | 2000.0000   | N/A                |
| V1.0_MW_RQC1_20211018 | Quality Control | 7.12e5     | N/A           | 3.15     | 7.0   | 0.0000      | 8.177172e1         |
| Blank                 | Unknown         | N/A        | N/A           | N/A      | N/A   | N/A         | N/A                |
| V1.0_MWMS_20211021_1  | Unknown         | 1.35e6     | N/A           | 3.12     | 181.9 | N/A         | 1.550653e2         |
| MWXS212101D3_R1       | Quality Control | 1.34e6     | N/A           | 3.12     | 158.3 | 0.0000      | 1.534507e2         |
| MWXS212101D3_R2       | Quality Control | 1.35e6     | N/A           | 3.12     | 190.6 | 0.0000      | 1.546317e2         |
| MWXS212101D3_R3       | Quality Control | 1.32e6     | N/A           | 3.12     | 207.7 | 0.0000      | 1.516821e2         |
| A21233250b_b          | Unknown         | 1.38e5     | N/A           | 3.12     | 5.4   | N/A         | 1.578425e1         |
| A21233251b_b          | Unknown         | 2.81e4     | N/A           | 3.11     | 3.2   | N/A         | 3.195797e0         |
| A21233252b_b          | Unknown         | 2.02e4     | N/A           | 3.12     | 1.4   | N/A         | 2.289951e0         |
| A21233253b_b          | Unknown         | 2.07e6     | N/A           | 3.14     | 9.1   | N/A         | 2.381581e2         |
| A21233254b_b          | Unknown         | 1.45e6     | N/A           | 3.14     | 10.4  | N/A         | 1.662930e2         |
| A21233255b_b          | Unknown         | 2.68e6     | N/A           | 3.14     | 10.1  | N/A         | 3.080498e2         |
| A21233256b_b          | Unknown         | 2.85e6     | N/A           | 3.13     | 8.0   | N/A         | 3.275771e2         |
| A21233257b_b          | Unknown         | 4.68e6     | N/A           | 3.14     | 8.4   | N/A         | 5.374901e2         |
| A21233258b_b          | Unknown         | 2.29e6     | N/A           | 3.13     | 8.6   | N/A         | 2.629950e2         |
| A21233259b_b          | Unknown         | 4.43e4     | N/A           | 3.12     | 2.2   | N/A         | 5.060799e0         |
| A21233260b_b          | Unknown         | 1.37e4     | N/A           | 3.12     | 1.2   | N/A         | 1.539768e0         |
| A21233261b_b          | Unknown         | 5.41e4     | N/A           | 3.12     | 1.5   | N/A         | 6.186214e0         |
| A21233262b_b          | Unknown         | 3.51e5     | N/A           | 3.14     | 4.1   | N/A         | 4.026867e1         |
| A21233263b_b          | Unknown         | 1.88e6     | N/A           | 3.13     | 6.0   | N/A         | 2.161953e2         |
| A21233264b_b          | Unknown         | 1.20e6     | N/A           | 3.14     | 5.3   | N/A         | 1.380269e2         |
| A21233265b_b          | Unknown         | 3.12e6     | N/A           | 3.14     | 4.9   | N/A         | 3.586214e2         |
| A21233266b_b          | Unknown         | 2.68e6     | N/A           | 3.13     | 6.8   | N/A         | 3.082297e2         |
| A21233267b_b          | Unknown         | 2.99e6     | N/A           | 3.12     | 7.8   | N/A         | 3.434060e2         |

Compound name: Naringenin-7-glucoside

Regression Equation:  $y = 8700.91348x + 266.54093$  ( $r = 0.99881$ ) (weighting:  $1/x$ )

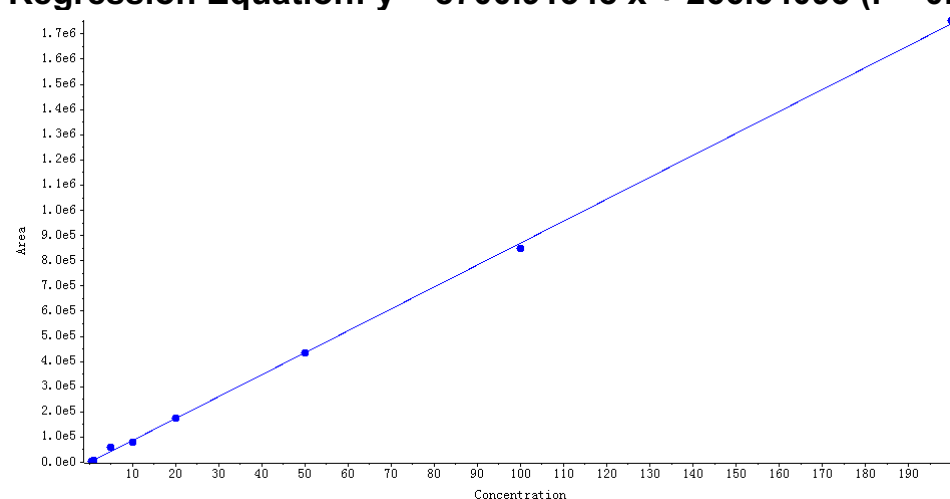

## Peak Review

### Blank

Naringenin-7-glucoside AREA:N/A  
S/N:N/A

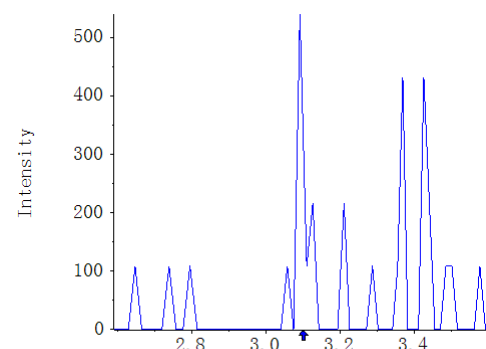

### V1.0\_MWMS\_20211021\_1

Naringenin-7-glucoside AREA:1.35e6 S/N:181.9

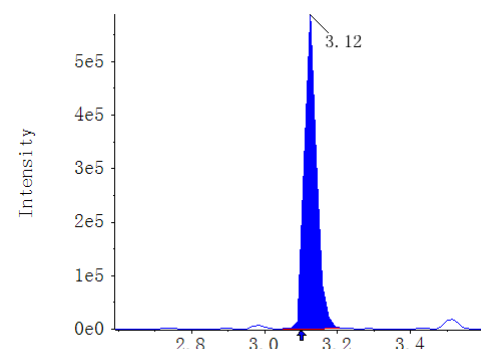

### A21233250b\_b

Naringenin-7-glucoside AREA:1.38e5 S/N:5.4

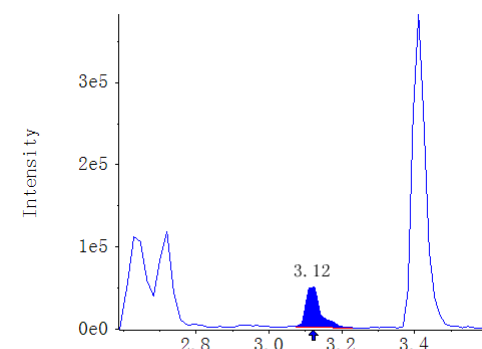

### A21233251b\_b

Naringenin-7-glucoside AREA:2.81e4 S/N:3.2

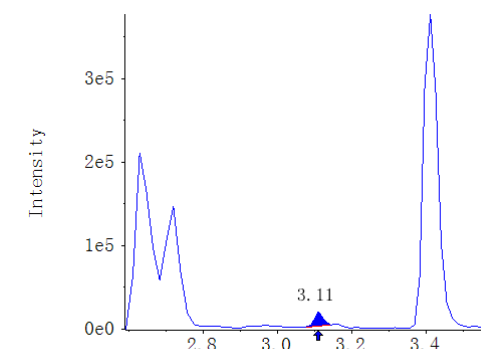

### A21233252b\_b

Naringenin-7-glucoside AREA:2.02e4 S/N:1.4

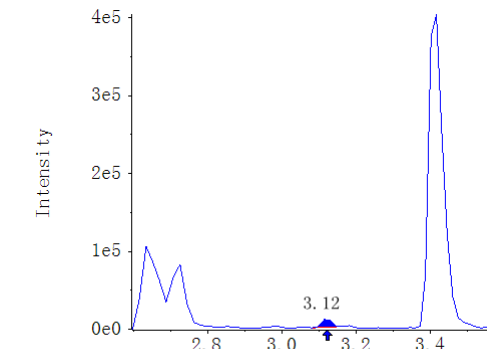

### A21233253b\_b

Naringenin-7-glucoside AREA:2.07e6 S/N:9.1

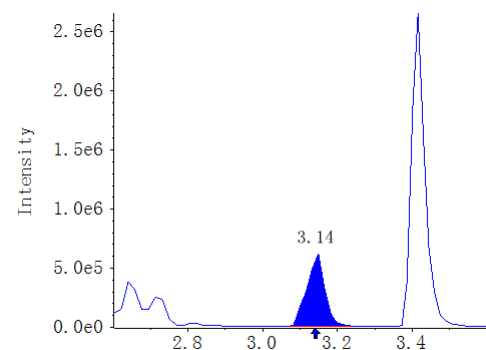

### A21233254b\_b

Naringenin-7-glucoside AREA:1.45e6 S/N:10.4

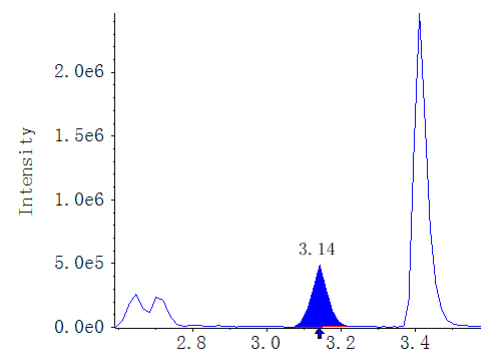

### A21233255b\_b

Naringenin-7-glucoside AREA:2.68e6 S/N:10.1

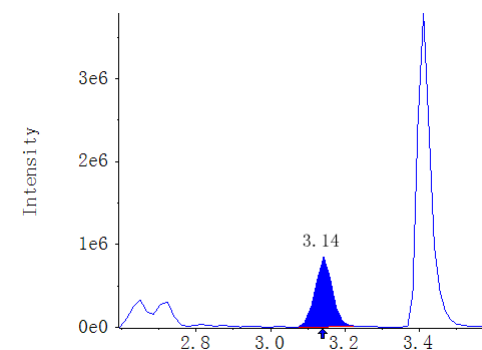

### A21233256b\_b

Naringenin-7-glucoside AREA:2.85e6 S/N:8.0

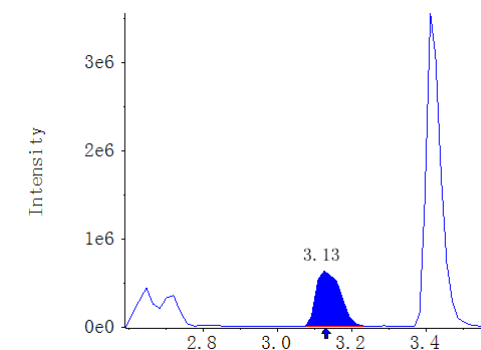

### A21233257b\_b

Naringenin-7-glucoside AREA:4.68e6 S/N:8.4

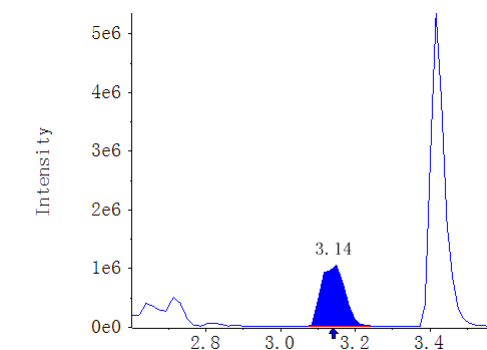

**A21233258b\_b**  
Naringenin-7-glucoside  
AREA:2.29e6 S/N:8.6

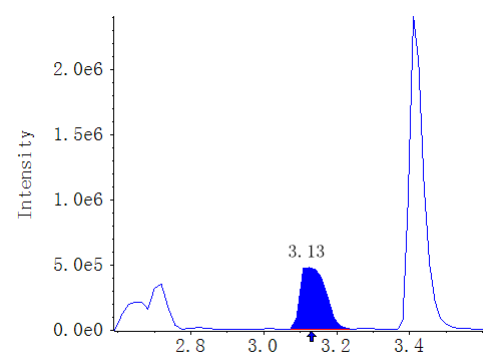

**A21233259b\_b**  
Naringenin-7-glucoside  
AREA:4.43e4 S/N:2.2

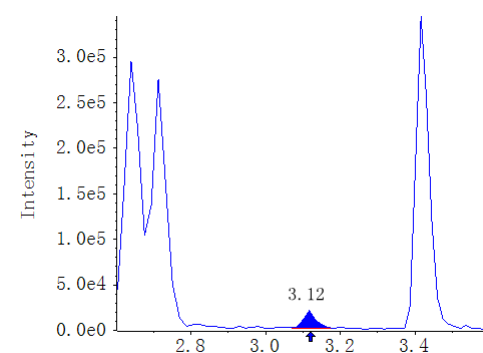

**A21233260b\_b**  
Naringenin-7-glucoside  
AREA:1.37e4 S/N:1.2

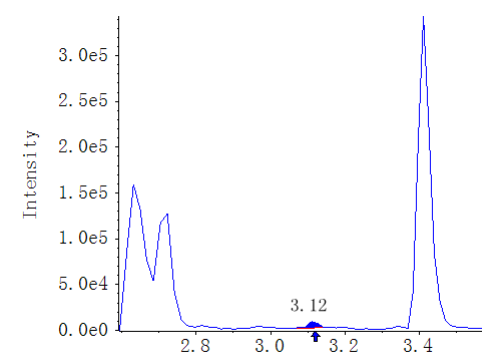

**A21233261b\_b**  
Naringenin-7-glucoside  
AREA:5.41e4 S/N:1.5

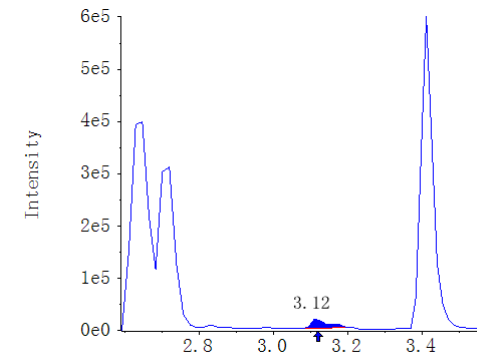

**A21233262b\_b**  
Naringenin-7-glucoside  
AREA:3.51e5 S/N:4.1

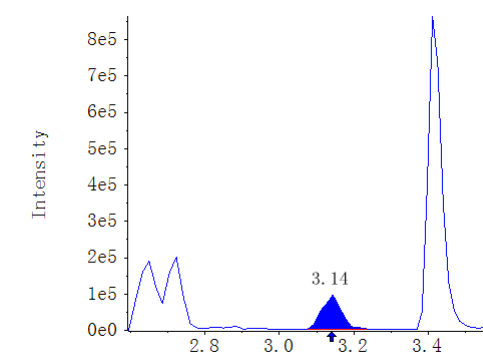

**A21233263b\_b**  
Naringenin-7-glucoside  
AREA:1.88e6 S/N:6.0

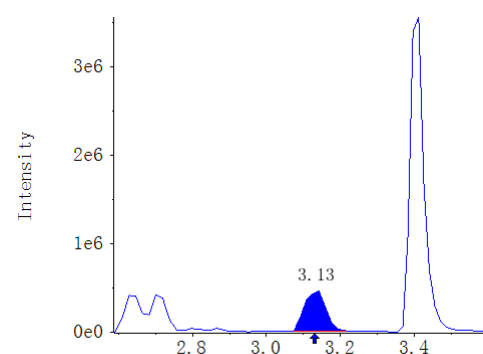

**A21233264b\_b**  
Naringenin-7-glucoside  
AREA:1.20e6 S/N:5.3

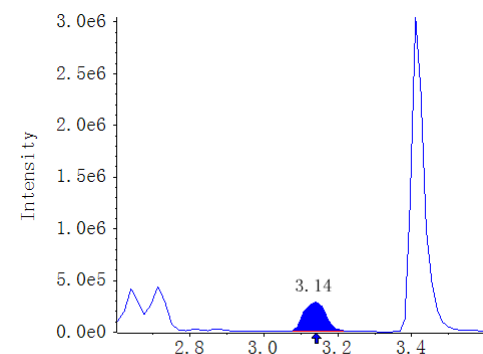

**A21233265b\_b**  
Naringenin-7-glucoside  
AREA:3.12e6 S/N:4.9

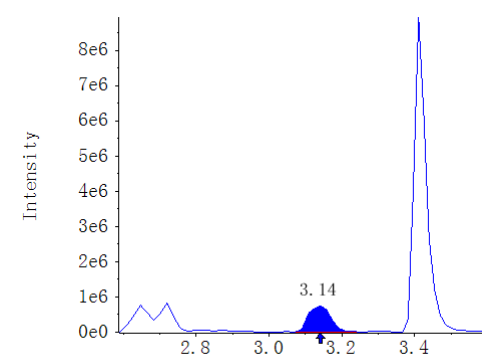

**A21233266b\_b**  
Naringenin-7-glucoside  
AREA:2.68e6 S/N:6.8

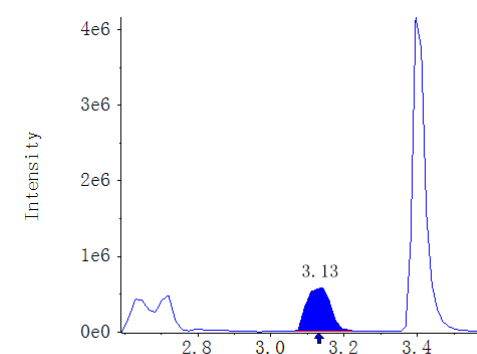

**A21233267b\_b**  
Naringenin-7-glucoside  
AREA:2.99e6 S/N:7.8

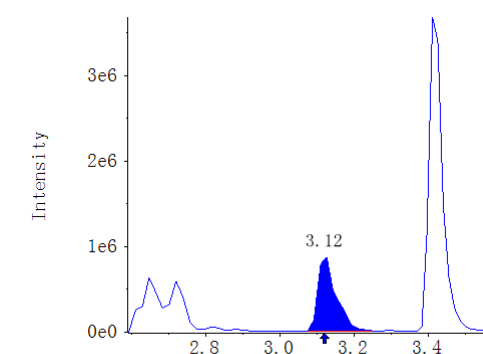

|                    |                                                    |                 |                      |
|--------------------|----------------------------------------------------|-----------------|----------------------|
| Result Table       | MWXS-21-2101D-3_18_WH6500-5_A20-3_V1.0_TY_20211028 | Algorithm Used  | MQ4                  |
| Acquisition Method | Flavonoids_V1.0_WH6500-5_LT_20211025.dam           | Instrument Name | QTRAP 6500+ Low Mass |
| Project            | N/A                                                | Analytes QTY    | 204:144              |

**Compound name: Phloretin (273.1 / 167.0)**

| Sample Name           | Sample Type     | Area (cps) | Is Area (cps) | RT (min) | S/N   | Target Conc | Calculated Conc.() |
|-----------------------|-----------------|------------|---------------|----------|-------|-------------|--------------------|
| STD_0.5nM             | Standard        | 1.44e4     | N/A           | 4.77     | 34.9  | 0.5000      | 3.454327e-1        |
| STD_1nM               | Standard        | 3.41e4     | N/A           | 4.76     | 71.2  | 1.0000      | 9.723479e-1        |
| STD_5nM               | Standard        | 2.16e5     | N/A           | 4.76     | 287.4 | 5.0000      | 6.762120e0         |
| STD_10nM              | Standard        | 3.15e5     | N/A           | 4.76     | 271.4 | 10.0000     | 9.934399e0         |
| STD_20nM              | Standard        | 6.16e5     | N/A           | 4.76     | 362.9 | 20.0000     | 1.951587e1         |
| STD_50nM              | Standard        | 1.61e6     | N/A           | 4.76     | 538.2 | 50.0000     | 5.112822e1         |
| STD_100nM             | Standard        | 3.16e6     | N/A           | 4.77     | 545.9 | 100.0000    | 1.006713e2         |
| STD_200nM             | Standard        | 6.19e6     | N/A           | 4.76     | 448.7 | 200.0000    | 1.971703e2         |
| STD_500nM             | Standard        | N/A        | N/A           | N/A      | N/A   | 500.0000    | N/A                |
| STD_1000nM            | Standard        | N/A        | N/A           | N/A      | N/A   | 1000.0000   | N/A                |
| STD_2000nM            | Standard        | N/A        | N/A           | N/A      | N/A   | 2000.0000   | N/A                |
| V1.0_MW_RQC1_20211018 | Quality Control | N/A        | N/A           | N/A      | N/A   | 0.0000      | N/A                |
| Blank                 | Unknown         | N/A        | N/A           | N/A      | N/A   | N/A         | N/A                |
| V1.0_MWMS_20211021_1  | Unknown         | 5.09e6     | N/A           | 4.78     | 608.3 | N/A         | 1.620100e2         |
| MWXS212101D3_R1       | Quality Control | 5.12e6     | N/A           | 4.77     | 543.4 | 0.0000      | 1.630662e2         |
| MWXS212101D3_R2       | Quality Control | 5.05e6     | N/A           | 4.77     | 383.5 | 0.0000      | 1.608577e2         |
| MWXS212101D3_R3       | Quality Control | 5.07e6     | N/A           | 4.77     | 496.9 | 0.0000      | 1.615869e2         |
| A21233250b_b          | Unknown         | N/A        | N/A           | N/A      | N/A   | N/A         | N/A                |
| A21233251b_b          | Unknown         | N/A        | N/A           | N/A      | N/A   | N/A         | N/A                |
| A21233252b_b          | Unknown         | N/A        | N/A           | N/A      | N/A   | N/A         | N/A                |
| A21233253b_b          | Unknown         | 5.94e6     | N/A           | 4.78     | 405.7 | N/A         | 1.892080e2         |
| A21233254b_b          | Unknown         | 9.09e6     | N/A           | 4.77     | 385.1 | N/A         | 2.894115e2         |
| A21233255b_b          | Unknown         | 9.64e6     | N/A           | 4.77     | 456.7 | N/A         | 3.071694e2         |
| A21233256b_b          | Unknown         | 2.30e6     | N/A           | 4.78     | 369.1 | N/A         | 7.320717e1         |
| A21233257b_b          | Unknown         | 2.09e6     | N/A           | 4.78     | 342.7 | N/A         | 6.635316e1         |
| A21233258b_b          | Unknown         | 8.38e5     | N/A           | 4.78     | 260.2 | N/A         | 2.658620e1         |
| A21233259b_b          | Unknown         | 7.69e4     | N/A           | 4.78     | 135.1 | N/A         | 2.336126e0         |
| A21233260b_b          | Unknown         | N/A        | N/A           | N/A      | N/A   | N/A         | N/A                |
| A21233261b_b          | Unknown         | 3.80e3     | N/A           | 4.77     | 12.1  | N/A         | 6.499808e-3        |
| A21233262b_b          | Unknown         | 1.89e6     | N/A           | 4.78     | 365.1 | N/A         | 6.005550e1         |
| A21233263b_b          | Unknown         | 4.77e6     | N/A           | 4.77     | 393.3 | N/A         | 1.518853e2         |
| A21233264b_b          | Unknown         | 7.94e6     | N/A           | 4.78     | 381.9 | N/A         | 2.529327e2         |
| A21233265b_b          | Unknown         | 2.19e6     | N/A           | 4.77     | 338.9 | N/A         | 6.960408e1         |
| A21233266b_b          | Unknown         | 3.50e6     | N/A           | 4.77     | 349.2 | N/A         | 1.113551e2         |
| A21233267b_b          | Unknown         | 1.02e6     | N/A           | 4.78     | 214.8 | N/A         | 3.238315e1         |

Compound name: Phloretin

Regression Equation:  $y = 3.13837e4 x + 3599.36185$  ( $r = 0.99898$ ) (weighting:  $1 / x$ )

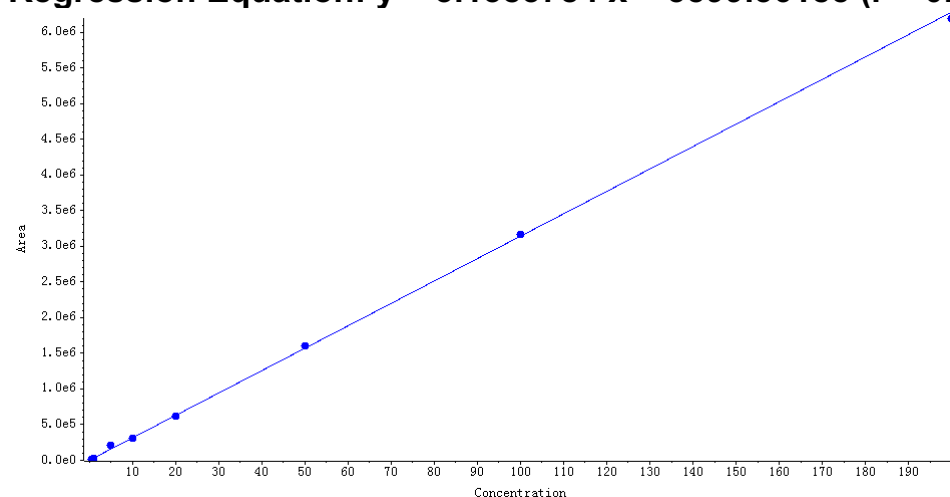

### Peak Review

Blank

Phloretin AREA:N/A S/N:N/A

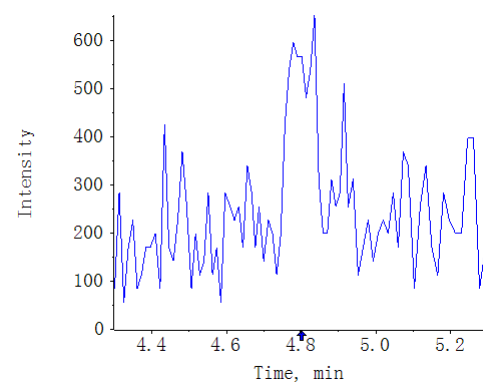

V1.0\_MWMS\_20211021\_1

Phloretin AREA:5.09e6 S/N:608.3

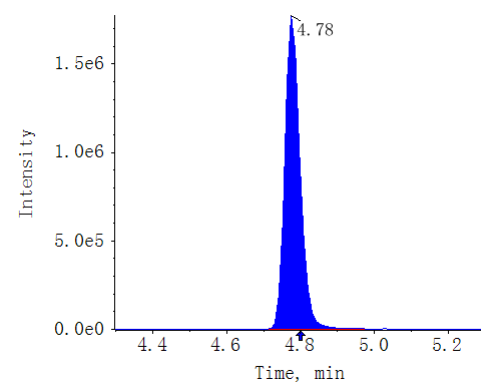

A21233250b\_b

Phloretin AREA:N/A S/N:N/A

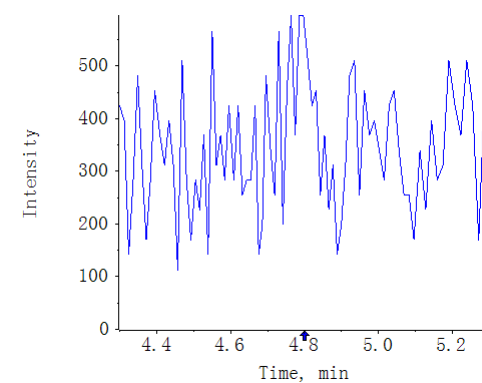

A21233251b\_b

Phloretin AREA:N/A S/N:N/A

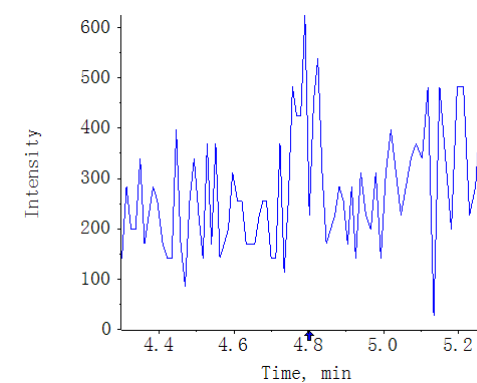

A21233252b\_b

Phloretin AREA:N/A S/N:N/A

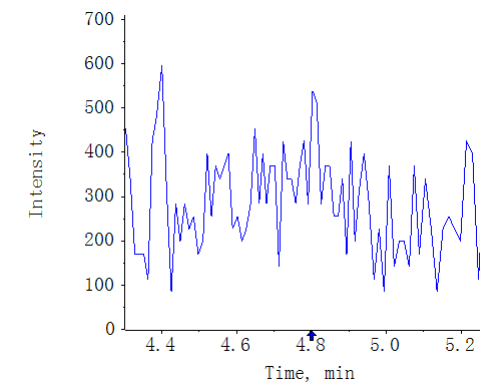

A21233253b\_b

Phloretin AREA:5.94e6 S/N:405.7

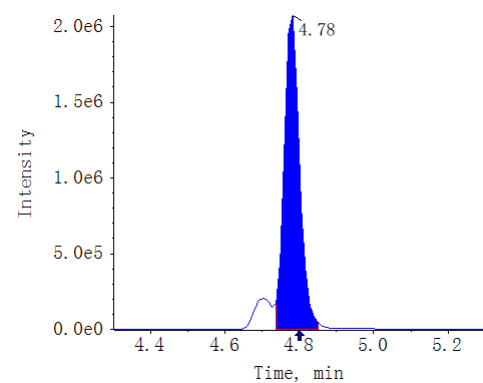

A21233254b\_b

Phloretin AREA:9.09e6 S/N:385.1

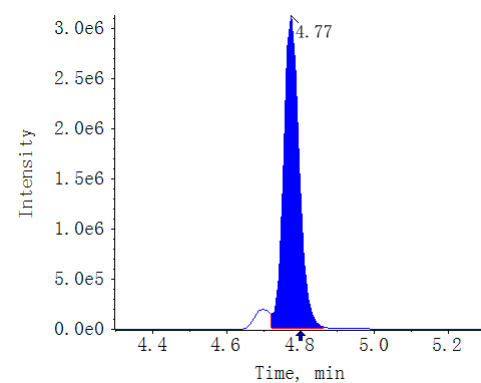

A21233255b\_b

Phloretin AREA:9.64e6 S/N:456.7

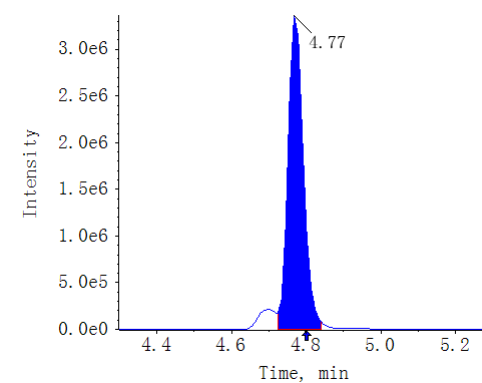

A21233256b\_b

Phloretin AREA:2.30e6 S/N:369.1

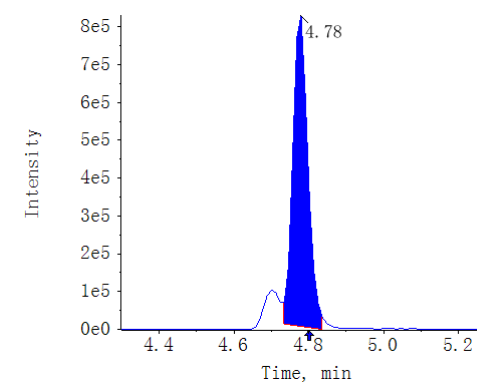

A21233257b\_b

Phloretin AREA:2.09e6 S/N:342.7

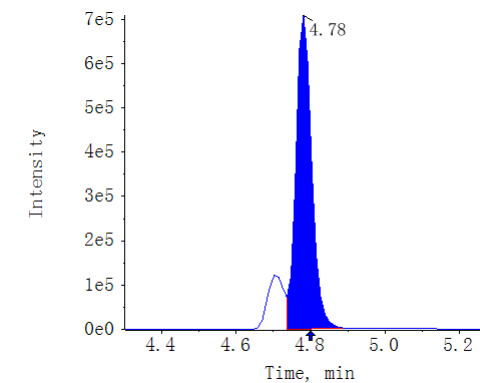

**A21233258b\_b**

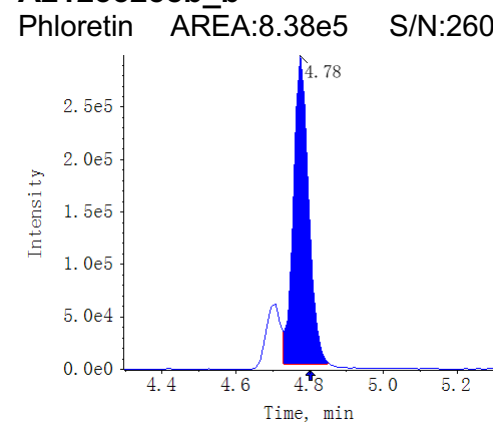

**A21233259b\_b**

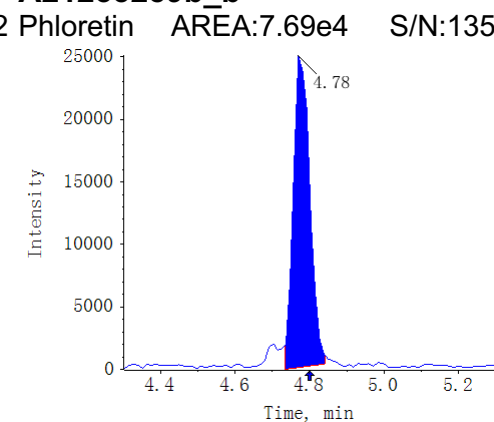

**A21233260b\_b**

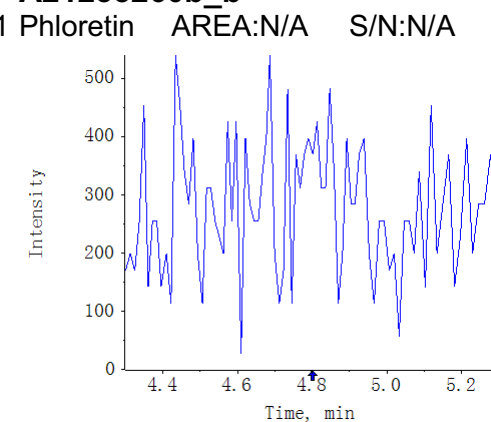

**A21233261b\_b**

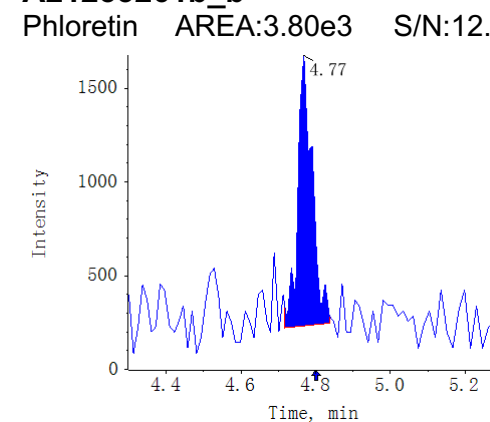

**A21233262b\_b**

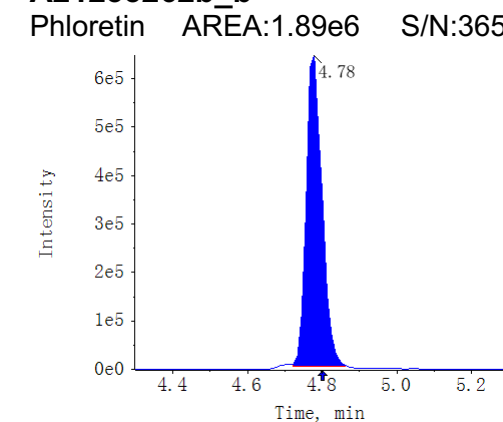

**A21233263b\_b**

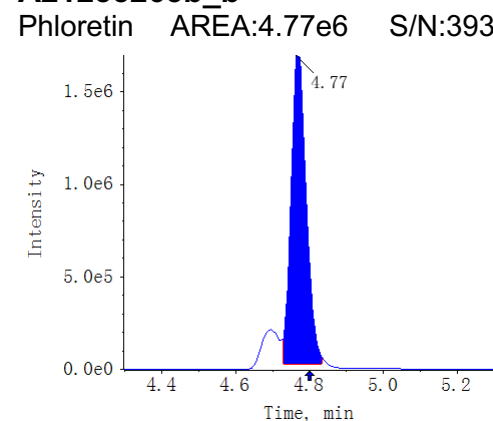

**A21233264b\_b**

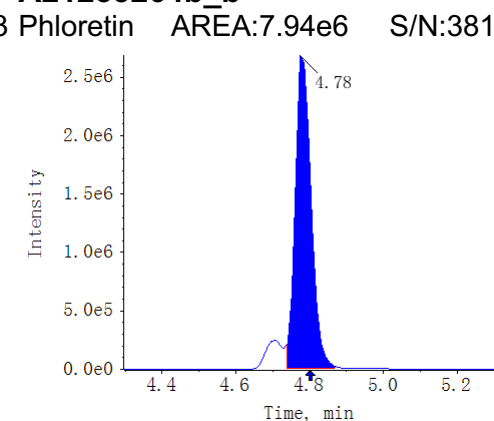

**A21233265b\_b**

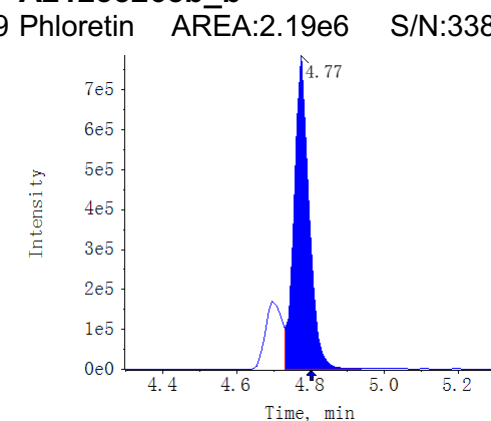

**A21233266b\_b**

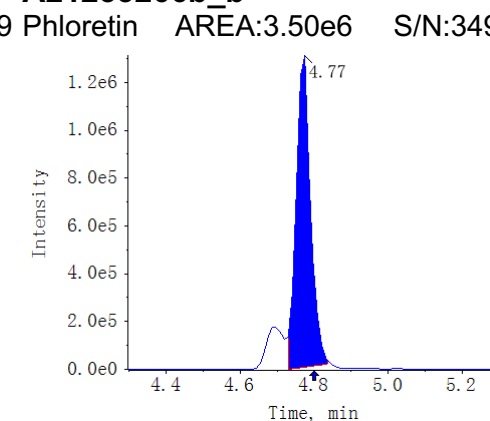

**A21233267b\_b**

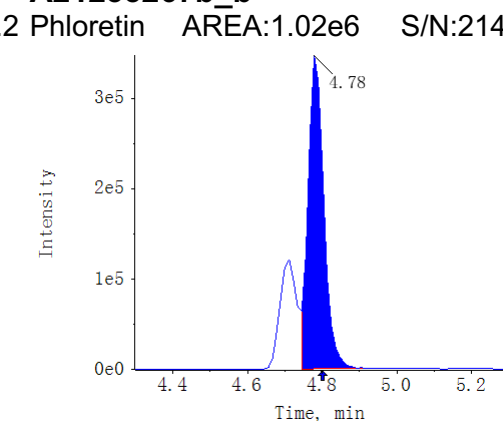

|                    |                                                    |                 |                      |
|--------------------|----------------------------------------------------|-----------------|----------------------|
| Result Table       | MWXS-21-2101D-3_18_WH6500-5_A20-3_V1.0_TY_20211028 | Algorithm Used  | MQ4                  |
| Acquisition Method | Flavonoids_V1.0_WH6500-5_LT_20211025.dam           | Instrument Name | QTRAP 6500+ Low Mass |
| Project            | N/A                                                | Analytes QTY    | 204:150              |

**Compound name: 2'-Hydroxygenistein (285.0 / 217.1)**

| Sample Name           | Sample Type     | Area (cps) | Is Area (cps) | RT (min) | S/N   | Target Conc | Calculated Conc.() |
|-----------------------|-----------------|------------|---------------|----------|-------|-------------|--------------------|
| STD_0.5nM             | Standard        | N/A        | N/A           | N/A      | N/A   | 0.5000      | N/A                |
| STD_1nM               | Standard        | 1.54e4     | N/A           | 3.93     | 14.5  | 1.0000      | 6.743100e-1        |
| STD_5nM               | Standard        | 1.09e5     | N/A           | 3.94     | 40.4  | 5.0000      | 6.097807e0         |
| STD_10nM              | Standard        | 1.84e5     | N/A           | 3.94     | 46.3  | 10.0000     | 1.037800e1         |
| STD_20nM              | Standard        | 3.55e5     | N/A           | 3.93     | 73.0  | 20.0000     | 2.027102e1         |
| STD_50nM              | Standard        | 9.29e5     | N/A           | 3.94     | 108.3 | 50.0000     | 5.330769e1         |
| STD_100nM             | Standard        | 1.78e6     | N/A           | 3.95     | 153.2 | 100.0000    | 1.024537e2         |
| STD_200nM             | Standard        | 3.35e6     | N/A           | 3.94     | 188.8 | 200.0000    | 1.928175e2         |
| STD_500nM             | Standard        | N/A        | N/A           | N/A      | N/A   | 500.0000    | N/A                |
| STD_1000nM            | Standard        | N/A        | N/A           | N/A      | N/A   | 1000.0000   | N/A                |
| STD_2000nM            | Standard        | N/A        | N/A           | N/A      | N/A   | 2000.0000   | N/A                |
| V1.0_MW_RQC1_20211018 | Quality Control | N/A        | N/A           | N/A      | N/A   | 0.0000      | N/A                |
| Blank                 | Unknown         | N/A        | N/A           | N/A      | N/A   | N/A         | N/A                |
| V1.0_MWMS_20211021_1  | Unknown         | 2.72e6     | N/A           | 3.95     | 171.8 | N/A         | 1.564257e2         |
| MWXS212101D3_R1       | Quality Control | 2.68e6     | N/A           | 3.95     | 190.0 | 0.0000      | 1.545370e2         |
| MWXS212101D3_R2       | Quality Control | 2.74e6     | N/A           | 3.95     | 165.1 | 0.0000      | 1.575790e2         |
| MWXS212101D3_R3       | Quality Control | 2.76e6     | N/A           | 3.95     | 181.7 | 0.0000      | 1.590474e2         |
| A21233250b_b          | Unknown         | N/A        | N/A           | N/A      | N/A   | N/A         | N/A                |
| A21233251b_b          | Unknown         | N/A        | N/A           | N/A      | N/A   | N/A         | N/A                |
| A21233252b_b          | Unknown         | N/A        | N/A           | N/A      | N/A   | N/A         | N/A                |
| A21233253b_b          | Unknown         | 1.55e4     | N/A           | 3.99     | 17.3  | N/A         | 6.777220e-1        |
| A21233254b_b          | Unknown         | 1.38e4     | N/A           | 3.99     | 19.8  | N/A         | 5.838434e-1        |
| A21233255b_b          | Unknown         | 2.37e4     | N/A           | 3.99     | 21.4  | N/A         | 1.151848e0         |
| A21233256b_b          | Unknown         | 1.63e4     | N/A           | 4.00     | 14.3  | N/A         | 7.260531e-1        |
| A21233257b_b          | Unknown         | 1.57e4     | N/A           | 4.00     | 15.7  | N/A         | 6.894020e-1        |
| A21233258b_b          | Unknown         | N/A        | N/A           | N/A      | N/A   | N/A         | N/A                |
| A21233259b_b          | Unknown         | N/A        | N/A           | N/A      | N/A   | N/A         | N/A                |
| A21233260b_b          | Unknown         | N/A        | N/A           | N/A      | N/A   | N/A         | N/A                |
| A21233261b_b          | Unknown         | N/A        | N/A           | N/A      | N/A   | N/A         | N/A                |
| A21233262b_b          | Unknown         | N/A        | N/A           | N/A      | N/A   | N/A         | N/A                |
| A21233263b_b          | Unknown         | 2.46e4     | N/A           | 3.99     | 16.1  | N/A         | 1.202948e0         |
| A21233264b_b          | Unknown         | 2.02e4     | N/A           | 4.00     | 19.7  | N/A         | 9.535194e-1        |
| A21233265b_b          | Unknown         | 1.54e4     | N/A           | 3.99     | 18.4  | N/A         | 6.724102e-1        |
| A21233266b_b          | Unknown         | 1.20e4     | N/A           | 3.99     | 16.0  | N/A         | 4.759983e-1        |
| A21233267b_b          | Unknown         | 2.12e4     | N/A           | 4.00     | 20.6  | N/A         | 1.006407e0         |

Compound name: 2'-Hydroxygenistein

Regression Equation:  $y = 17349.32894 x + 3704.57035$  ( $r = 0.99872$ ) (weighting:  $1 / x$ )

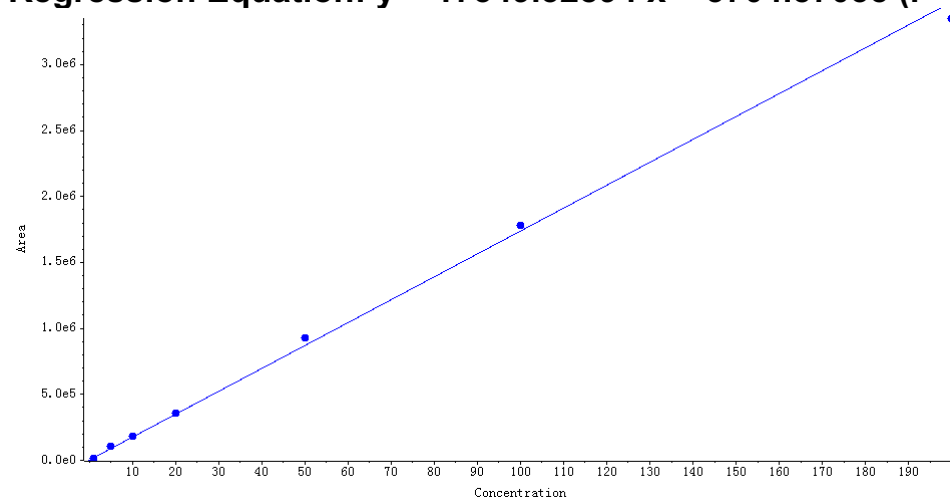

### Peak Review

#### Blank

2'-Hydroxygenistein AREA:N/A  
S/N:N/A

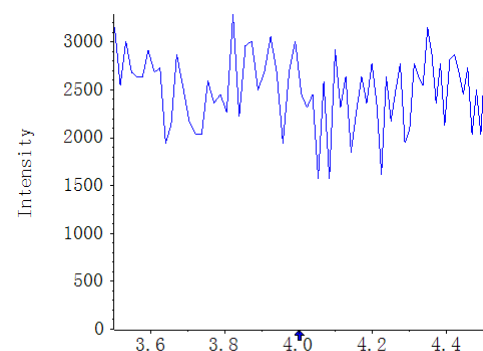

#### V1.0\_MWMS\_20211021\_1

2'-Hydroxygenistein AREA:2.72e6  
S/N:171.8

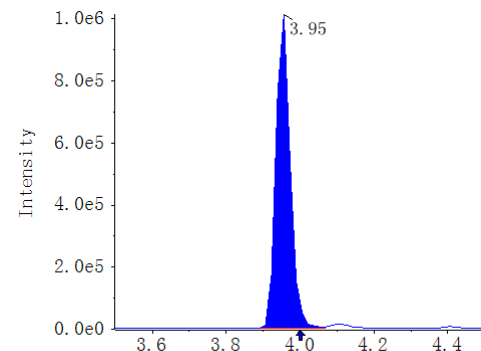

#### A21233250b\_b

2'-Hydroxygenistein AREA:N/A  
S/N:N/A

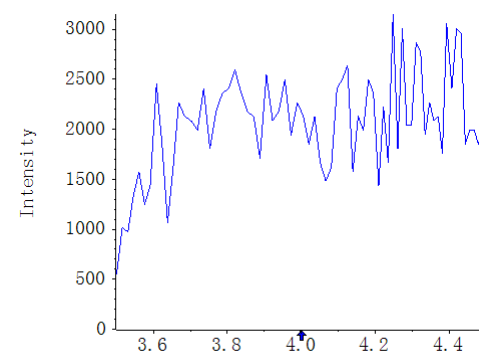

#### A21233251b\_b

2'-Hydroxygenistein AREA:N/A  
S/N:N/A

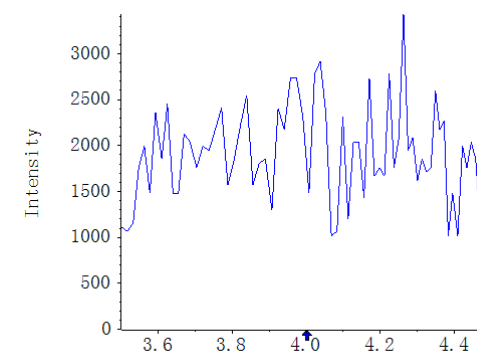

#### A21233252b\_b

2'-Hydroxygenistein AREA:N/A  
S/N:N/A

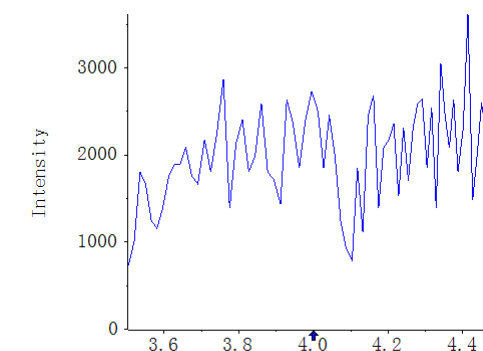

#### A21233253b\_b

2'-Hydroxygenistein AREA:1.55e4  
S/N:17.3

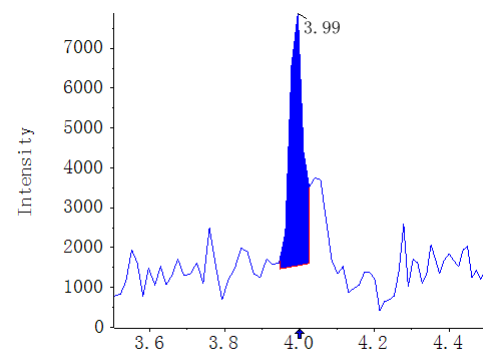

#### A21233254b\_b

2'-Hydroxygenistein AREA:1.38e4  
S/N:19.8

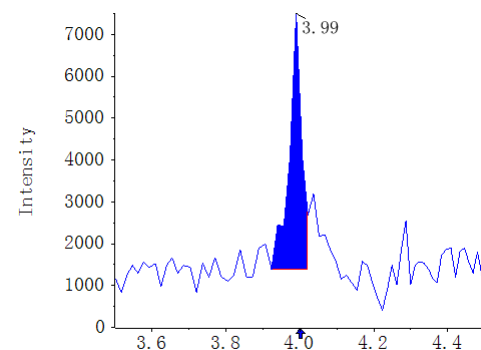

#### A21233255b\_b

2'-Hydroxygenistein AREA:2.37e4  
S/N:21.4

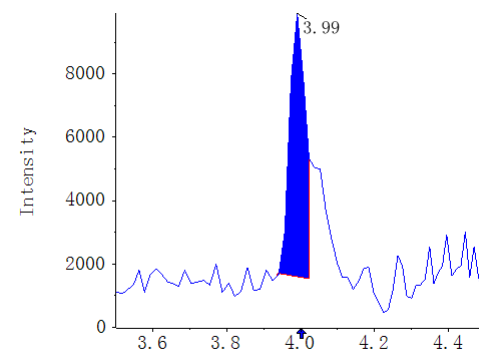

#### A21233256b\_b

2'-Hydroxygenistein AREA:1.63e4  
S/N:14.3

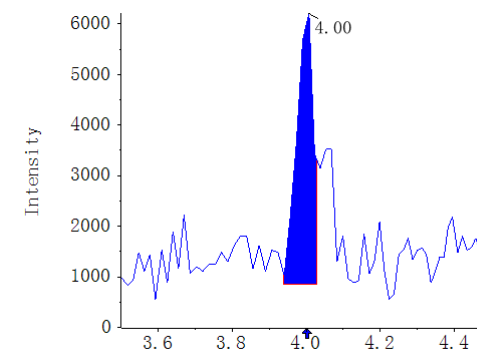

#### A21233257b\_b

2'-Hydroxygenistein AREA:1.57e4  
S/N:15.7

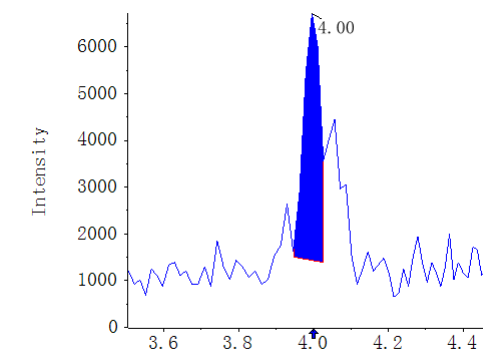

**A21233258b\_b**

2'-Hydroxygenistein AREA:N/A  
S/N:N/A

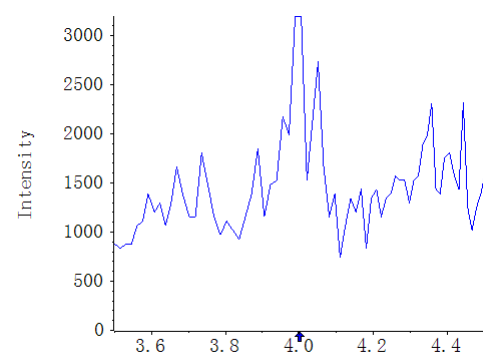

**A21233259b\_b**

2'-Hydroxygenistein AREA:N/A  
S/N:N/A

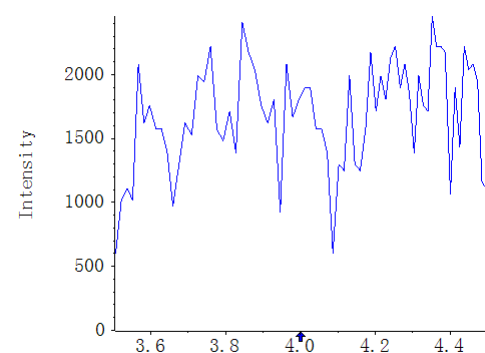

**A21233260b\_b**

2'-Hydroxygenistein AREA:N/A  
S/N:N/A

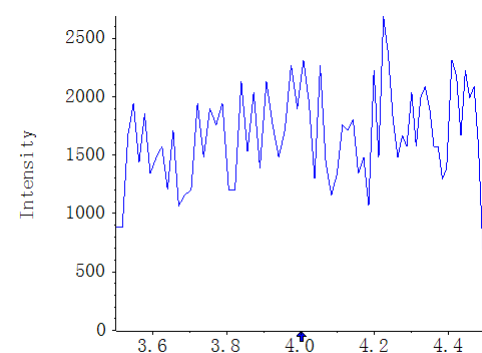

**A21233261b\_b**

2'-Hydroxygenistein AREA:N/A  
S/N:N/A

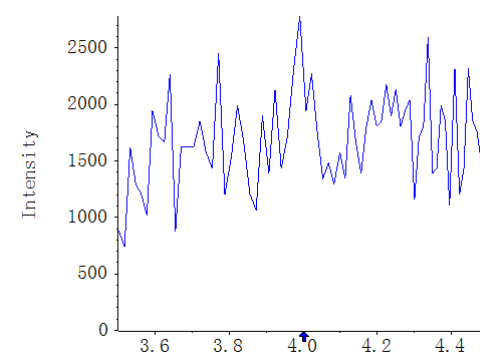

**A21233262b\_b**

2'-Hydroxygenistein AREA:N/A  
S/N:N/A

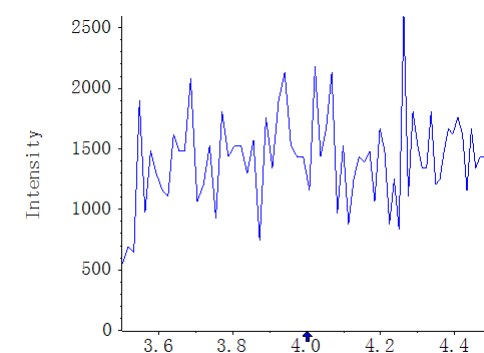

**A21233263b\_b**

2'-Hydroxygenistein AREA:2.46e4  
S/N:16.1

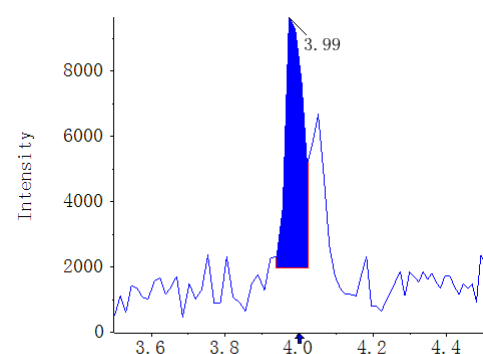

**A21233264b\_b**

2'-Hydroxygenistein AREA:2.02e4  
S/N:19.7

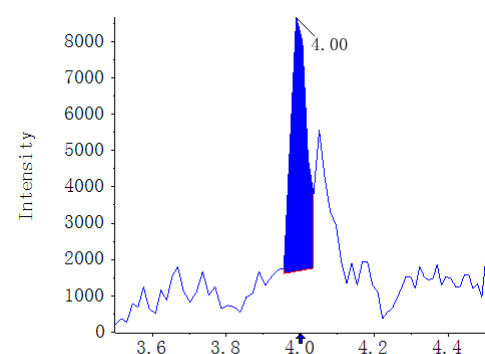

**A21233265b\_b**

2'-Hydroxygenistein AREA:1.54e4  
S/N:18.4

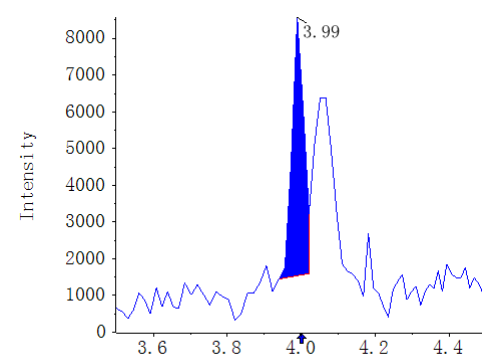

**A21233266b\_b**

2'-Hydroxygenistein AREA:1.20e4  
S/N:16.0

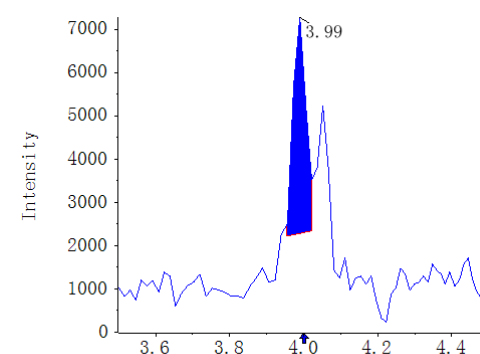

**A21233267b\_b**

2'-Hydroxygenistein AREA:2.12e4  
S/N:20.6

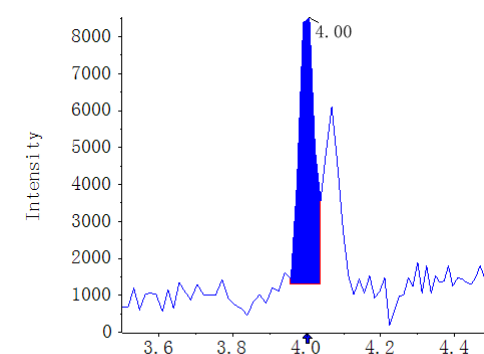

|                    |                                                    |                 |                      |
|--------------------|----------------------------------------------------|-----------------|----------------------|
| Result Table       | MWXS-21-2101D-3_18_WH6500-5_A20-3_V1.0_TY_20211028 | Algorithm Used  | MQ4                  |
| Acquisition Method | Flavonoids_V1.0_WH6500-5_LT_20211025.dam           | Instrument Name | QTRAP 6500+ Low Mass |
| Project            | N/A                                                | Analytes QTY    | 204:151              |

**Compound name: Afzelechin (273.1 / 97.0)**

| Sample Name           | Sample Type     | Area (cps) | Is Area (cps) | RT (min) | S/N   | Target Conc | Calculated Conc.() |
|-----------------------|-----------------|------------|---------------|----------|-------|-------------|--------------------|
| STD_0.5nM             | Standard        | 2.41e3     | N/A           | 2.51     | 7.0   | 0.5000      | 5.873713e-1        |
| STD_1nM               | Standard        | 2.93e3     | N/A           | 2.50     | 8.1   | 1.0000      | 8.034364e-1        |
| STD_5nM               | Standard        | 1.51e4     | N/A           | 2.50     | 24.3  | 5.0000      | 5.929118e0         |
| STD_10nM              | Standard        | 2.18e4     | N/A           | 2.50     | 35.7  | 10.0000     | 8.726105e0         |
| STD_20nM              | Standard        | 4.39e4     | N/A           | 2.50     | 58.0  | 20.0000     | 1.803070e1         |
| STD_50nM              | Standard        | 1.29e5     | N/A           | 2.50     | 112.7 | 50.0000     | 5.365338e1         |
| STD_100nM             | Standard        | 2.36e5     | N/A           | 2.51     | 147.3 | 100.0000    | 9.898690e1         |
| STD_200nM             | Standard        | 4.76e5     | N/A           | 2.50     | 189.8 | 200.0000    | 1.997830e2         |
| STD_500nM             | Standard        | N/A        | N/A           | N/A      | N/A   | 500.0000    | N/A                |
| STD_1000nM            | Standard        | N/A        | N/A           | N/A      | N/A   | 1000.0000   | N/A                |
| STD_2000nM            | Standard        | N/A        | N/A           | N/A      | N/A   | 2000.0000   | N/A                |
| V1.0_MW_RQC1_20211018 | Quality Control | N/A        | N/A           | N/A      | N/A   | 0.0000      | N/A                |
| Blank                 | Unknown         | N/A        | N/A           | N/A      | N/A   | N/A         | N/A                |
| V1.0_MWMS_20211021_1  | Unknown         | 3.74e5     | N/A           | 2.50     | 164.5 | N/A         | 1.566454e2         |
| MWXS212101D3_R1       | Quality Control | 3.86e5     | N/A           | 2.50     | 214.3 | 0.0000      | 1.616872e2         |
| MWXS212101D3_R2       | Quality Control | 3.67e5     | N/A           | 2.50     | 212.1 | 0.0000      | 1.538263e2         |
| MWXS212101D3_R3       | Quality Control | 3.76e5     | N/A           | 2.50     | 171.5 | 0.0000      | 1.575193e2         |
| A21233250b_b          | Unknown         | N/A        | N/A           | N/A      | N/A   | N/A         | N/A                |
| A21233251b_b          | Unknown         | 2.99e4     | N/A           | 2.54     | 16.0  | N/A         | 1.212205e1         |
| A21233252b_b          | Unknown         | 1.45e4     | N/A           | 2.55     | 7.2   | N/A         | 5.657142e0         |
| A21233253b_b          | Unknown         | N/A        | N/A           | N/A      | N/A   | N/A         | N/A                |
| A21233254b_b          | Unknown         | N/A        | N/A           | N/A      | N/A   | N/A         | N/A                |
| A21233255b_b          | Unknown         | 1.42e4     | N/A           | 2.53     | 8.7   | N/A         | 5.540977e0         |
| A21233256b_b          | Unknown         | 8.74e3     | N/A           | 2.52     | 5.7   | N/A         | 3.248910e0         |
| A21233257b_b          | Unknown         | N/A        | N/A           | N/A      | N/A   | N/A         | N/A                |
| A21233258b_b          | Unknown         | 1.30e4     | N/A           | 2.52     | 9.0   | N/A         | 5.048716e0         |
| A21233259b_b          | Unknown         | N/A        | N/A           | N/A      | N/A   | N/A         | N/A                |
| A21233260b_b          | Unknown         | 2.20e4     | N/A           | 2.54     | 7.7   | N/A         | 8.812834e0         |
| A21233261b_b          | Unknown         | N/A        | N/A           | N/A      | N/A   | N/A         | N/A                |
| A21233262b_b          | Unknown         | N/A        | N/A           | N/A      | N/A   | N/A         | N/A                |
| A21233263b_b          | Unknown         | N/A        | N/A           | N/A      | N/A   | N/A         | N/A                |
| A21233264b_b          | Unknown         | N/A        | N/A           | N/A      | N/A   | N/A         | N/A                |
| A21233265b_b          | Unknown         | N/A        | N/A           | N/A      | N/A   | N/A         | N/A                |
| A21233266b_b          | Unknown         | 1.04e4     | N/A           | 2.52     | 5.2   | N/A         | 3.953060e0         |
| A21233267b_b          | Unknown         | N/A        | N/A           | N/A      | N/A   | N/A         | N/A                |

Compound name: Afzelechin  
Regression Equation:  $y = 2378.79838x + 1016.17421$  ( $r = 0.99883$ ) (weighting:  $1/x$ )

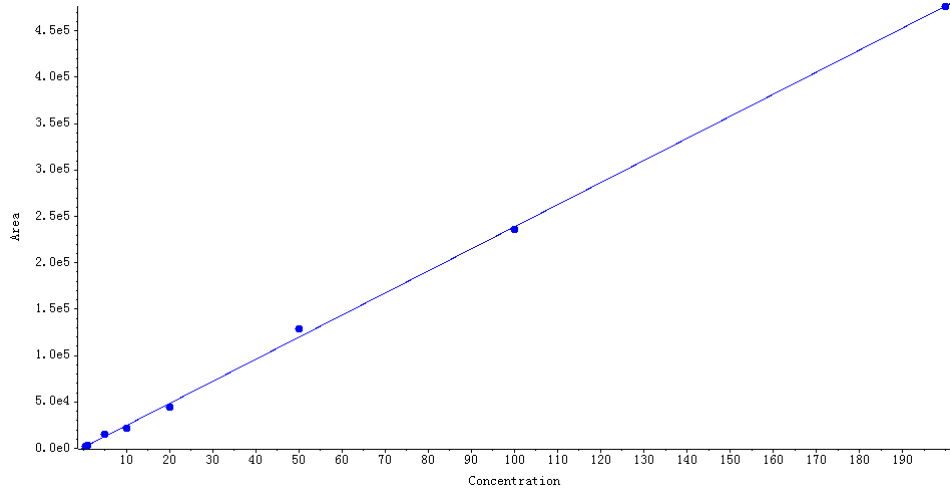

Peak Review

Blank

Afzelechin AREA:N/A S/N:N/A

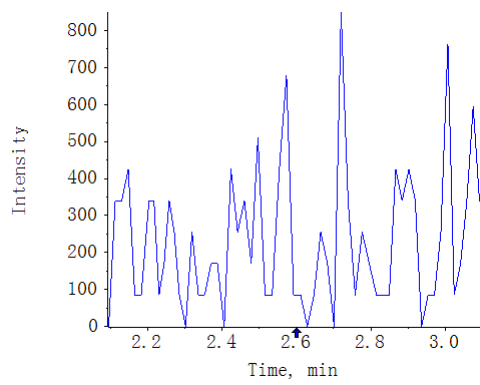

V1.0\_MWMS\_20211021\_1

Afzelechin AREA:3.74e5 S/N:164.5

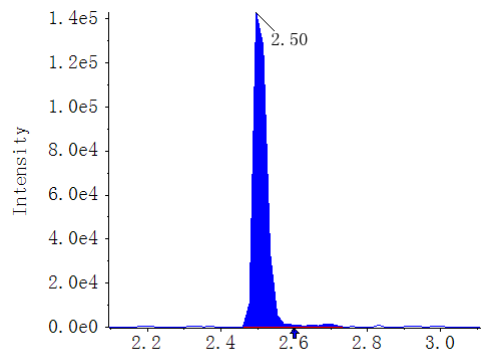

A21233250b\_b

Afzelechin AREA:N/A S/N:N/A

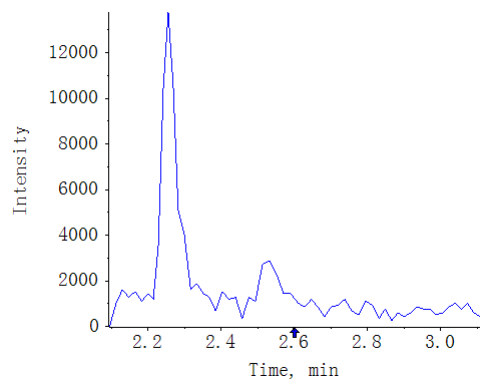

A21233251b\_b

Afzelechin AREA:2.99e4 S/N:16.0

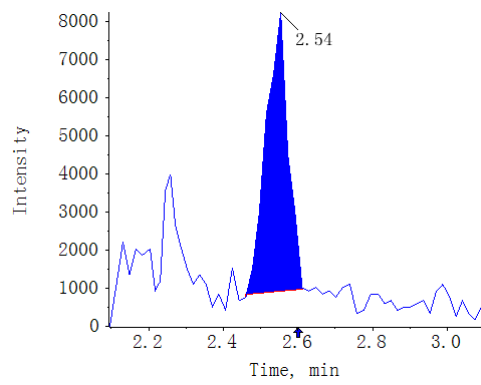

A21233252b\_b

Afzelechin AREA:1.45e4 S/N:7.2

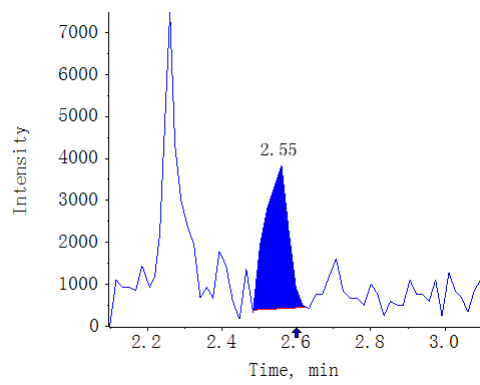

A21233253b\_b

Afzelechin AREA:N/A S/N:N/A

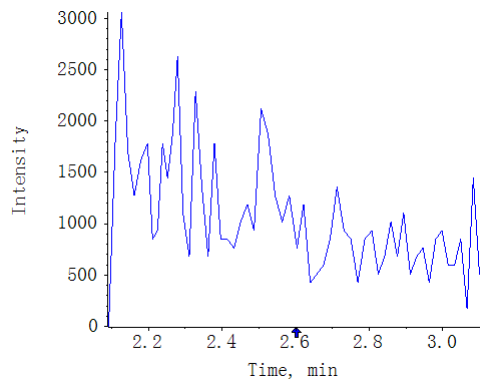

A21233254b\_b

Afzelechin AREA:N/A S/N:N/A

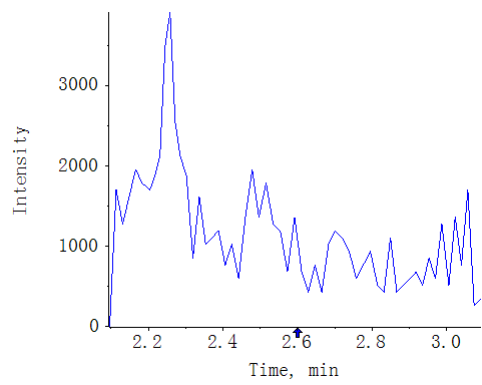

A21233255b\_b

Afzelechin AREA:1.42e4 S/N:8.7

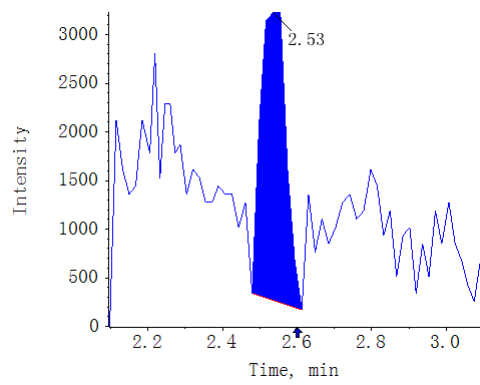

A21233256b\_b

Afzelechin AREA:8.74e3 S/N:5.7

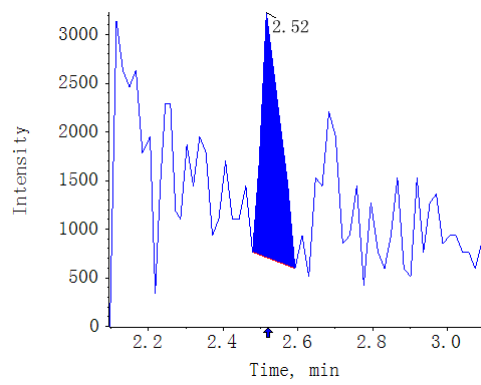

A21233257b\_b

Afzelechin AREA:N/A S/N:N/A

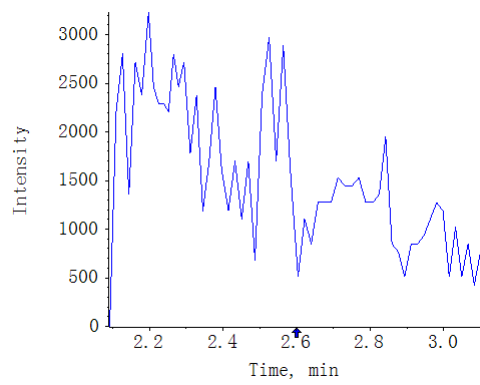

**A21233258b\_b**

Afzelechin AREA:1.30e4 S/N:9.0

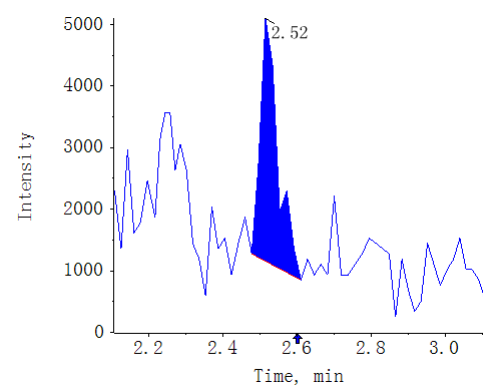

**A21233259b\_b**

Afzelechin AREA:N/A S/N:N/A

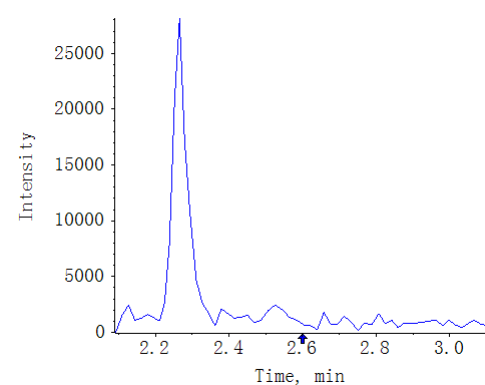

**A21233260b\_b**

Afzelechin AREA:2.20e4 S/N:7.7

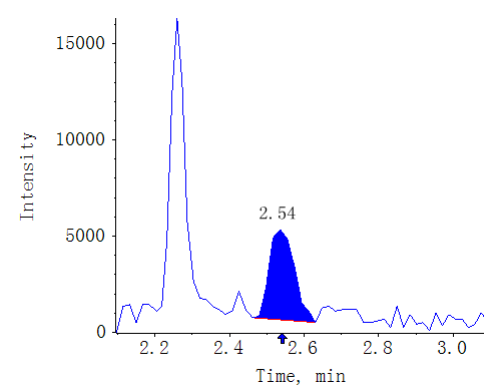

**A21233261b\_b**

Afzelechin AREA:N/A S/N:N/A

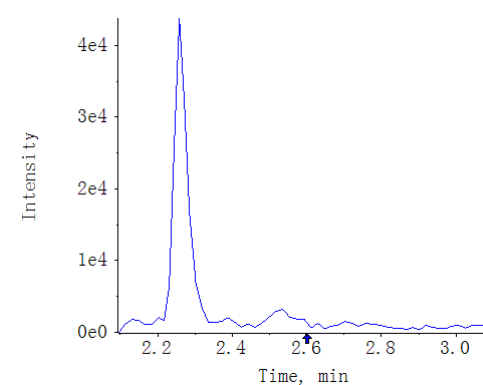

**A21233262b\_b**

Afzelechin AREA:N/A S/N:N/A

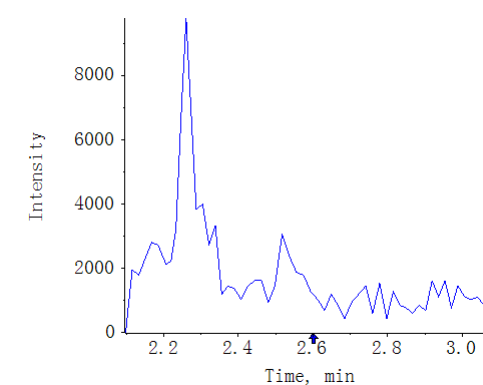

**A21233263b\_b**

Afzelechin AREA:N/A S/N:N/A

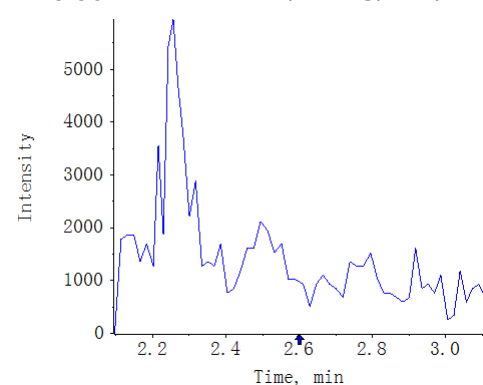

**A21233264b\_b**

Afzelechin AREA:N/A S/N:N/A

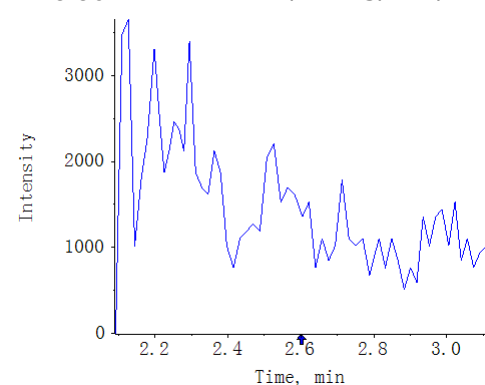

**A21233265b\_b**

Afzelechin AREA:N/A S/N:N/A

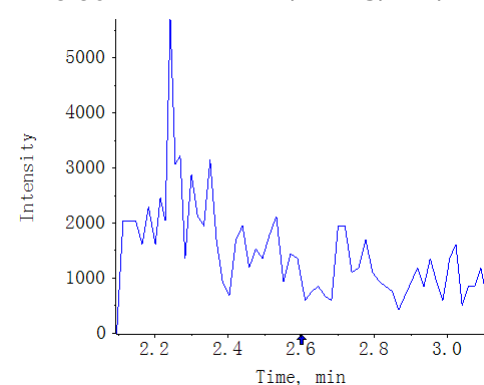

**A21233266b\_b**

Afzelechin AREA:1.04e4 S/N:5.2

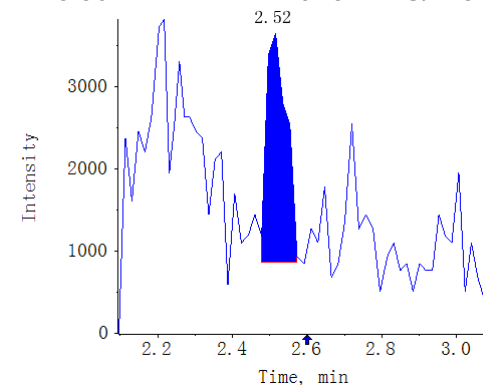

**A21233267b\_b**

Afzelechin AREA:N/A S/N:N/A

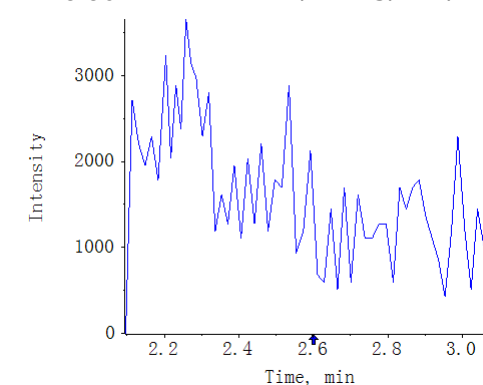

|                    |                                                    |                 |                      |
|--------------------|----------------------------------------------------|-----------------|----------------------|
| Result Table       | MWXS-21-2101D-3_18_WH6500-5_A20-3_V1.0_TY_20211028 | Algorithm Used  | MQ4                  |
| Acquisition Method | Flavonoids_V1.0_WH6500-5_LT_20211025.dam           | Instrument Name | QTRAP 6500+ Low Mass |
| Project            | N/A                                                | Analytes QTY    | 204:158              |

**Compound name: Naringenin chalcone (271.1 / 151.0)**

| Sample Name           | Sample Type     | Area (cps) | Is Area (cps) | RT (min) | S/N  | Target Conc | Calculated Conc.() |
|-----------------------|-----------------|------------|---------------|----------|------|-------------|--------------------|
| STD_0.5nM             | Standard        | 5.31e3     | N/A           | 4.84     | 14.0 | 0.5000      | 3.231434e-1        |
| STD_1nM               | Standard        | 1.21e4     | N/A           | 4.83     | 28.5 | 1.0000      | 9.285855e-1        |
| STD_5nM               | Standard        | 7.92e4     | N/A           | 4.83     | 63.0 | 5.0000      | 6.905083e0         |
| STD_10nM              | Standard        | 1.17e5     | N/A           | 4.83     | 69.2 | 10.0000     | 1.025034e1         |
| STD_20nM              | Standard        | 2.28e5     | N/A           | 4.82     | 76.8 | 20.0000     | 2.011255e1         |
| STD_50nM              | Standard        | 5.76e5     | N/A           | 4.83     | 80.2 | 50.0000     | 5.113991e1         |
| STD_100nM             | Standard        | 1.14e6     | N/A           | 4.84     | 80.7 | 100.0000    | 1.012898e2         |
| STD_200nM             | Standard        | 2.20e6     | N/A           | 4.83     | 85.1 | 200.0000    | 1.955505e2         |
| STD_500nM             | Standard        | N/A        | N/A           | N/A      | N/A  | 500.0000    | N/A                |
| STD_1000nM            | Standard        | N/A        | N/A           | N/A      | N/A  | 1000.0000   | N/A                |
| STD_2000nM            | Standard        | N/A        | N/A           | N/A      | N/A  | 2000.0000   | N/A                |
| V1.0_MW_RQC1_20211018 | Quality Control | 1.79e5     | N/A           | 4.82     | 93.6 | 0.0000      | 1.578834e1         |
| Blank                 | Unknown         | N/A        | N/A           | N/A      | N/A  | N/A         | N/A                |
| V1.0_MWMS_20211021_1  | Unknown         | 1.43e6     | N/A           | 4.84     | 69.4 | N/A         | 1.275502e2         |
| MWXS212101D3_R1       | Quality Control | 1.52e6     | N/A           | 4.84     | 76.2 | 0.0000      | 1.355855e2         |
| MWXS212101D3_R2       | Quality Control | 1.46e6     | N/A           | 4.84     | 60.8 | 0.0000      | 1.299998e2         |
| MWXS212101D3_R3       | Quality Control | 1.45e6     | N/A           | 4.84     | 62.0 | 0.0000      | 1.289043e2         |
| A21233250b_b          | Unknown         | 1.97e4     | N/A           | 4.83     | 18.7 | N/A         | 1.606717e0         |
| A21233251b_b          | Unknown         | 1.76e4     | N/A           | 4.84     | 17.2 | N/A         | 1.417131e0         |
| A21233252b_b          | Unknown         | 7.06e3     | N/A           | 4.84     | 9.8  | N/A         | 4.790587e-1        |
| A21233253b_b          | Unknown         | 4.13e7     | N/A           | 4.84     | 19.4 | N/A         | 3.679800e3         |
| A21233254b_b          | Unknown         | 4.17e7     | N/A           | 4.83     | 18.0 | N/A         | 3.709934e3         |
| A21233255b_b          | Unknown         | 5.78e7     | N/A           | 4.83     | 23.7 | N/A         | 5.145515e3         |
| A21233256b_b          | Unknown         | 1.78e7     | N/A           | 4.84     | 13.8 | N/A         | 1.581106e3         |
| A21233257b_b          | Unknown         | 2.57e7     | N/A           | 4.84     | 16.4 | N/A         | 2.289083e3         |
| A21233258b_b          | Unknown         | 9.89e6     | N/A           | 4.84     | 14.0 | N/A         | 8.809063e2         |
| A21233259b_b          | Unknown         | 4.95e5     | N/A           | 4.84     | 16.9 | N/A         | 4.395808e1         |
| A21233260b_b          | Unknown         | 1.58e4     | N/A           | 4.83     | 13.4 | N/A         | 1.253330e0         |
| A21233261b_b          | Unknown         | 1.25e5     | N/A           | 4.84     | 21.0 | N/A         | 1.096486e1         |
| A21233262b_b          | Unknown         | 7.93e6     | N/A           | 4.84     | 38.9 | N/A         | 7.061854e2         |
| A21233263b_b          | Unknown         | 6.16e7     | N/A           | 4.83     | 23.8 | N/A         | 5.482672e3         |
| A21233264b_b          | Unknown         | 7.72e7     | N/A           | 4.84     | 23.2 | N/A         | 6.872233e3         |
| A21233265b_b          | Unknown         | 3.80e7     | N/A           | 4.83     | 16.8 | N/A         | 3.387472e3         |
| A21233266b_b          | Unknown         | 4.29e7     | N/A           | 4.83     | 20.8 | N/A         | 3.820293e3         |
| A21233267b_b          | Unknown         | 2.44e7     | N/A           | 4.84     | 15.9 | N/A         | 2.171246e3         |

Compound name: Naringenin chalcone

Regression Equation:  $y = 11228.95985x + 1683.81489$  ( $r = 0.99872$ ) (weighting:  $1/x$ )

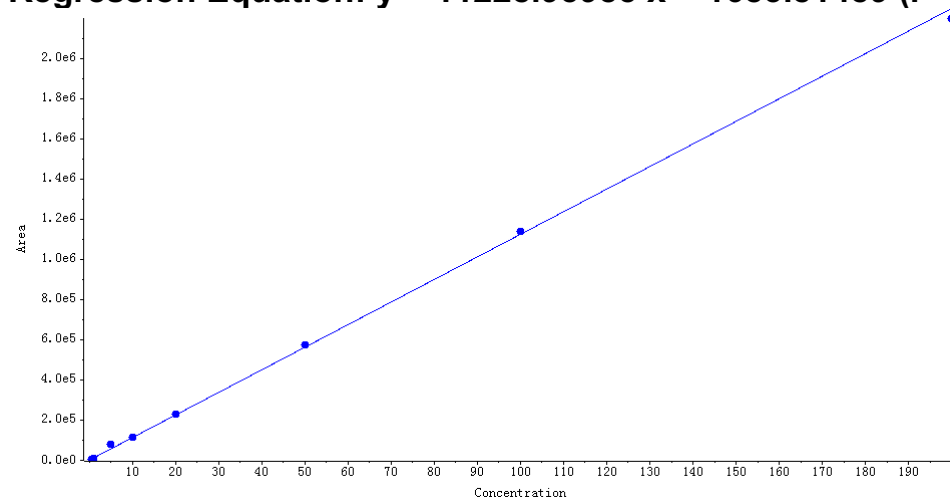

### Peak Review

#### Blank

Naringenin chalcone AREA:N/A  
S/N:N/A

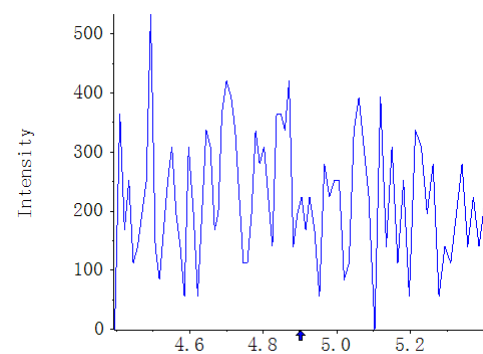

#### V1.0\_MWMS\_20211021\_1

Naringenin chalcone AREA:1.43e6  
S/N:69.4

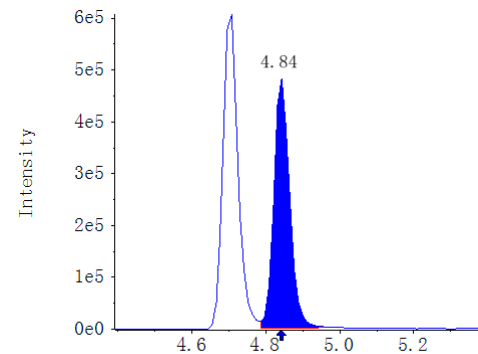

#### A21233250b\_b

Naringenin chalcone AREA:1.97e4  
S/N:18.7

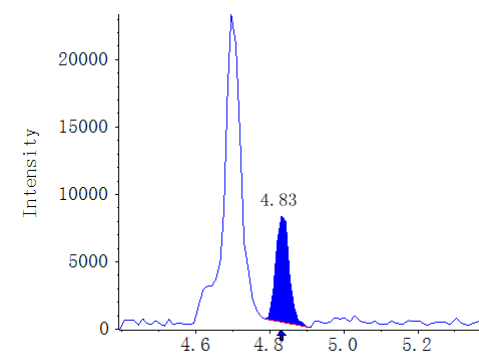

#### A21233251b\_b

Naringenin chalcone AREA:1.76e4  
S/N:17.2

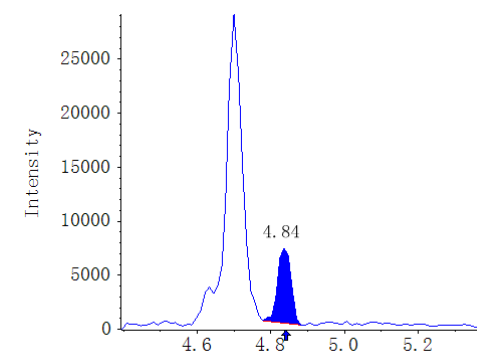

#### A21233252b\_b

Naringenin chalcone AREA:7.06e3  
S/N:9.8

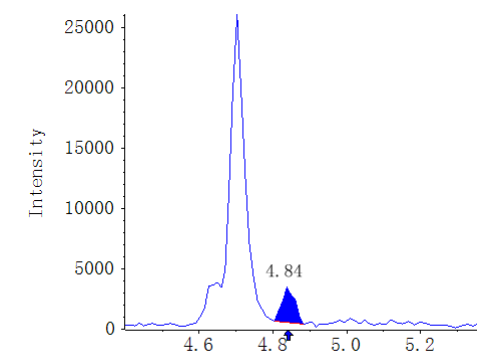

#### A21233253b\_b

Naringenin chalcone AREA:4.13e7  
S/N:19.4

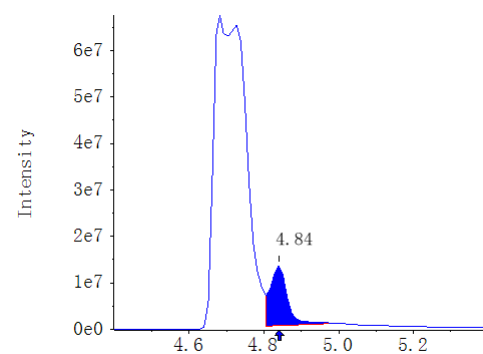

#### A21233254b\_b

Naringenin chalcone AREA:4.17e7  
S/N:18.0

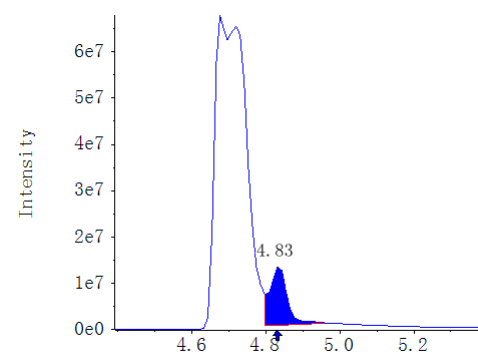

#### A21233255b\_b

Naringenin chalcone AREA:5.78e7  
S/N:23.7

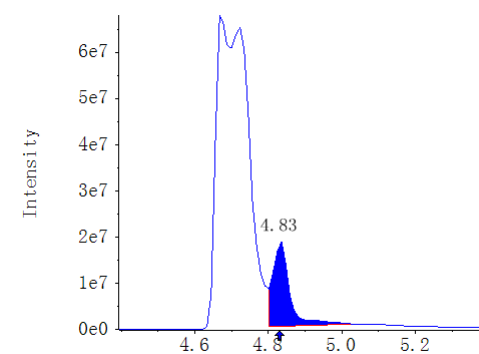

#### A21233256b\_b

Naringenin chalcone AREA:1.78e7  
S/N:13.8

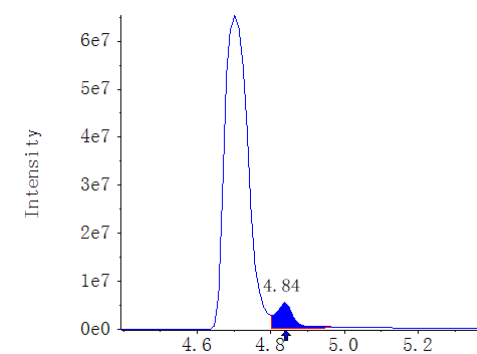

#### A21233257b\_b

Naringenin chalcone AREA:2.57e7  
S/N:16.4

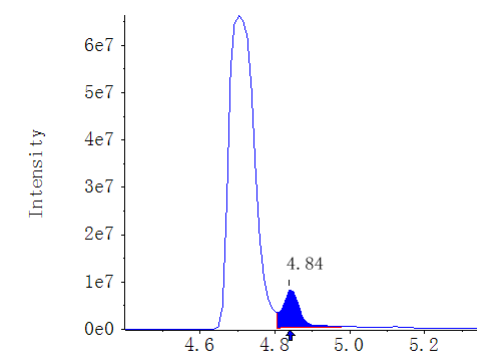

**A21233258b\_b**

Naringenin chalcone AREA:9.89e6  
S/N:14.0

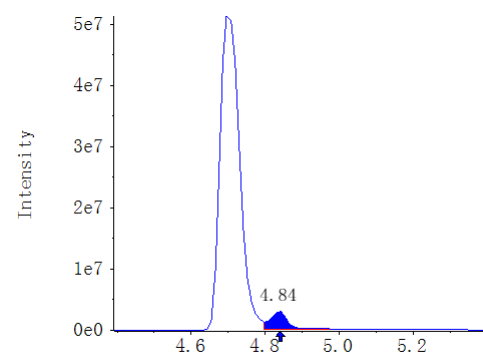

**A21233259b\_b**

Naringenin chalcone AREA:4.95e5  
S/N:16.9

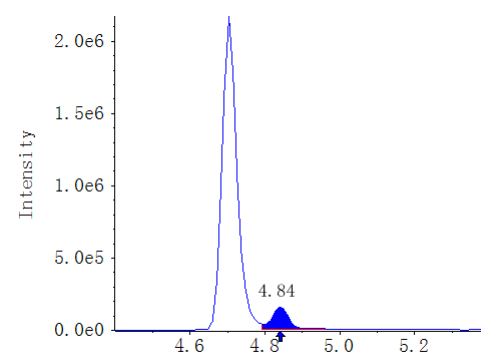

**A21233260b\_b**

Naringenin chalcone AREA:1.58e4  
S/N:13.4

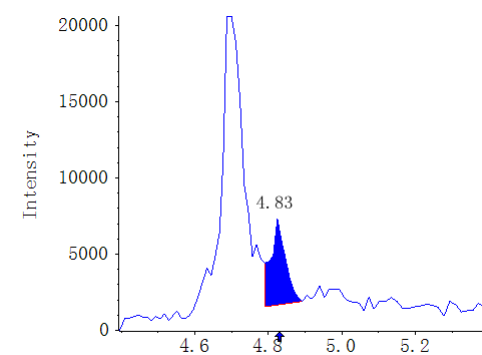

**A21233261b\_b**

Naringenin chalcone AREA:1.25e5  
S/N:21.0

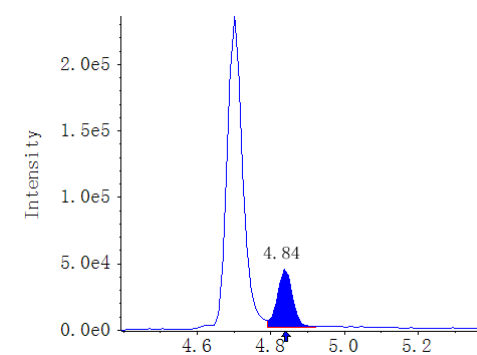

**A21233262b\_b**

Naringenin chalcone AREA:7.93e6  
S/N:38.9

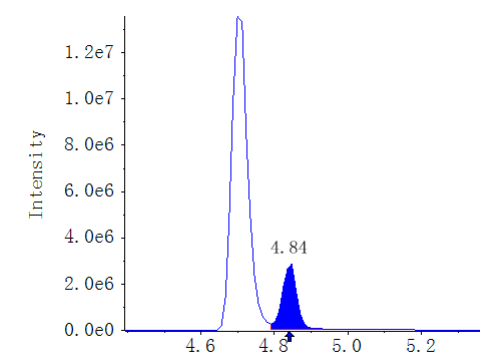

**A21233263b\_b**

Naringenin chalcone AREA:6.16e7  
S/N:23.8

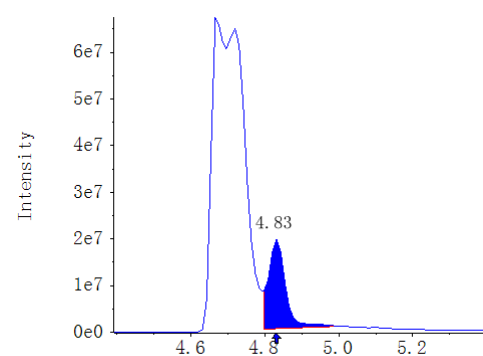

**A21233264b\_b**

Naringenin chalcone AREA:7.72e7  
S/N:23.2

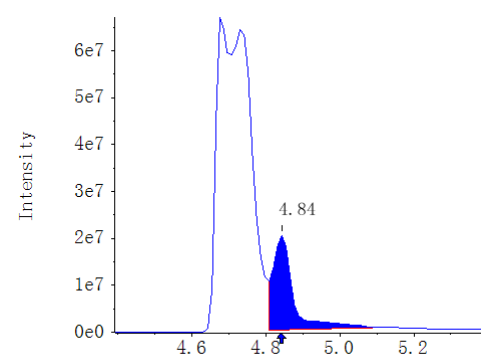

**A21233265b\_b**

Naringenin chalcone AREA:3.80e7  
S/N:16.8

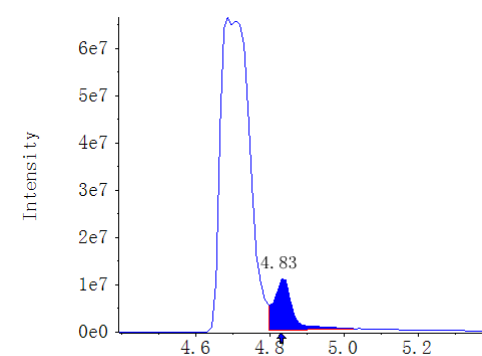

**A21233266b\_b**

Naringenin chalcone AREA:4.29e7  
S/N:20.8

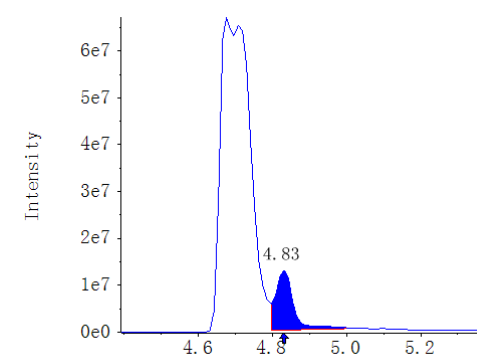

**A21233267b\_b**

Naringenin chalcone AREA:2.44e7  
S/N:15.9

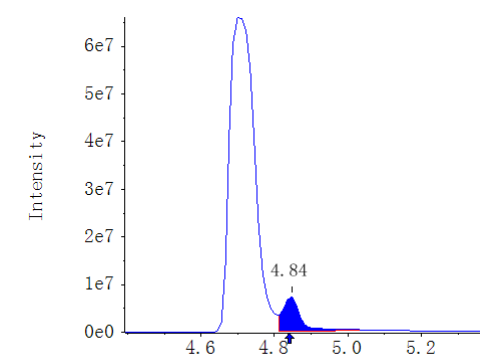

|                    |                                                    |                 |                      |
|--------------------|----------------------------------------------------|-----------------|----------------------|
| Result Table       | MWXS-21-2101D-3_18_WH6500-5_A20-3_V1.0_TY_20211028 | Algorithm Used  | MQ4                  |
| Acquisition Method | Flavonoids_V1.0_WH6500-5_LT_20211025.dam           | Instrument Name | QTRAP 6500+ Low Mass |
| Project            | N/A                                                | Analytes QTY    | 204:161              |

## Compound name: (-)-Gallocatechin (305.1 / 125.0)

| Sample Name           | Sample Type     | Area (cps) | Is Area (cps) | RT (min) | S/N   | Target Conc | Calculated Conc.() |
|-----------------------|-----------------|------------|---------------|----------|-------|-------------|--------------------|
| STD_0.5nM             | Standard        | 2.17e3     | N/A           | 1.67     | 9.6   | 0.5000      | 3.596021e-1        |
| STD_1nM               | Standard        | 3.50e3     | N/A           | 1.67     | 11.1  | 1.0000      | 8.923617e-1        |
| STD_5nM               | Standard        | 1.91e4     | N/A           | 1.66     | 40.7  | 5.0000      | 7.110249e0         |
| STD_10nM              | Standard        | 2.62e4     | N/A           | 1.67     | 54.7  | 10.0000     | 9.979292e0         |
| STD_20nM              | Standard        | 4.93e4     | N/A           | 1.66     | 63.3  | 20.0000     | 1.918175e1         |
| STD_50nM              | Standard        | 1.29e5     | N/A           | 1.66     | 109.2 | 50.0000     | 5.097309e1         |
| STD_100nM             | Standard        | 2.51e5     | N/A           | 1.67     | 88.5  | 100.0000    | 9.997751e1         |
| STD_200nM             | Standard        | 4.97e5     | N/A           | 1.66     | 108.3 | 200.0000    | 1.980261e2         |
| STD_500nM             | Standard        | N/A        | N/A           | N/A      | N/A   | 500.0000    | N/A                |
| STD_1000nM            | Standard        | N/A        | N/A           | N/A      | N/A   | 1000.0000   | N/A                |
| STD_2000nM            | Standard        | N/A        | N/A           | N/A      | N/A   | 2000.0000   | N/A                |
| V1.0_MW_RQC1_20211018 | Quality Control | 9.32e3     | N/A           | 1.66     | 6.6   | 0.0000      | 3.219723e0         |
| Blank                 | Unknown         | N/A        | N/A           | N/A      | N/A   | N/A         | N/A                |
| V1.0_MWMS_20211021_1  | Unknown         | 4.93e5     | N/A           | 1.67     | 108.8 | N/A         | 1.966229e2         |
| MWXS212101D3_R1       | Quality Control | 5.15e5     | N/A           | 1.66     | 130.9 | 0.0000      | 2.053009e2         |
| MWXS212101D3_R2       | Quality Control | 5.04e5     | N/A           | 1.66     | 102.7 | 0.0000      | 2.007614e2         |
| MWXS212101D3_R3       | Quality Control | 4.96e5     | N/A           | 1.67     | 113.3 | 0.0000      | 1.978122e2         |
| A21233250b_b          | Unknown         | 3.23e4     | N/A           | 1.66     | 27.0  | N/A         | 1.240587e1         |
| A21233251b_b          | Unknown         | 9.56e3     | N/A           | 1.66     | 11.3  | N/A         | 3.313340e0         |
| A21233252b_b          | Unknown         | 5.62e3     | N/A           | 1.66     | 11.4  | N/A         | 1.740240e0         |
| A21233253b_b          | Unknown         | 1.42e4     | N/A           | 1.69     | 9.2   | N/A         | 5.165340e0         |
| A21233254b_b          | Unknown         | 1.94e4     | N/A           | 1.69     | 12.3  | N/A         | 7.241347e0         |
| A21233255b_b          | Unknown         | 1.81e4     | N/A           | 1.69     | 15.1  | N/A         | 6.716384e0         |
| A21233256b_b          | Unknown         | 2.49e4     | N/A           | 1.69     | 10.3  | N/A         | 9.457888e0         |
| A21233257b_b          | Unknown         | 1.79e4     | N/A           | 1.69     | 11.1  | N/A         | 6.649387e0         |
| A21233258b_b          | Unknown         | 3.73e4     | N/A           | 1.69     | 16.4  | N/A         | 1.438324e1         |
| A21233259b_b          | Unknown         | 2.66e4     | N/A           | 1.67     | 21.4  | N/A         | 1.014180e1         |
| A21233260b_b          | Unknown         | 3.36e4     | N/A           | 1.66     | 21.3  | N/A         | 1.290619e1         |
| A21233261b_b          | Unknown         | 1.34e5     | N/A           | 1.67     | 37.5  | N/A         | 5.318343e1         |
| A21233262b_b          | Unknown         | 1.37e4     | N/A           | 1.69     | 8.5   | N/A         | 4.984391e0         |
| A21233263b_b          | Unknown         | 1.84e4     | N/A           | 1.68     | 8.5   | N/A         | 6.831857e0         |
| A21233264b_b          | Unknown         | 1.73e4     | N/A           | 1.67     | 8.9   | N/A         | 6.390119e0         |
| A21233265b_b          | Unknown         | 1.62e4     | N/A           | 1.69     | 10.1  | N/A         | 5.983787e0         |
| A21233266b_b          | Unknown         | 1.05e4     | N/A           | 1.68     | 8.6   | N/A         | 3.680123e0         |
| A21233267b_b          | Unknown         | 1.84e4     | N/A           | 1.69     | 11.4  | N/A         | 6.834675e0         |

Compound name: (-)-Gallocatechin  
Regression Equation:  $y = 2502.86675x + 1265.98335$  ( $r = 0.99862$ ) (weighting:  $1/x$ )

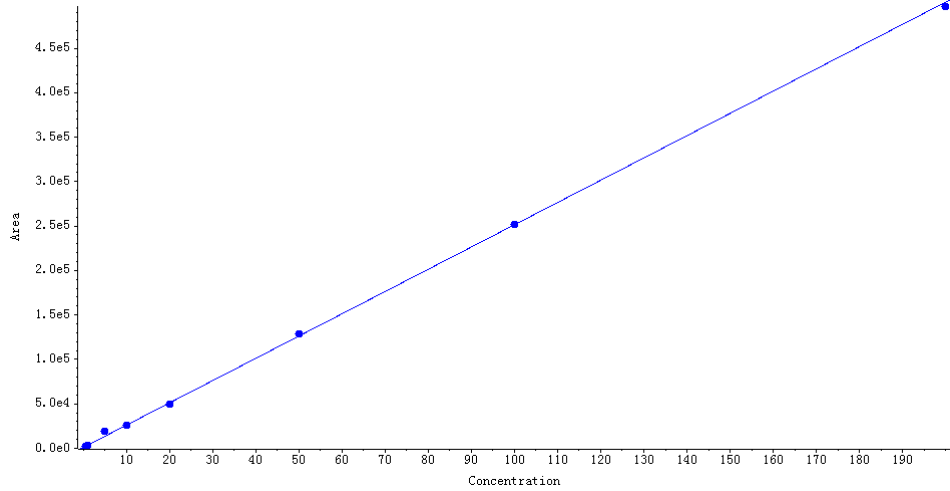

Peak Review

Blank

(-)-Gallocatechin AREA:N/A  
S/N:N/A

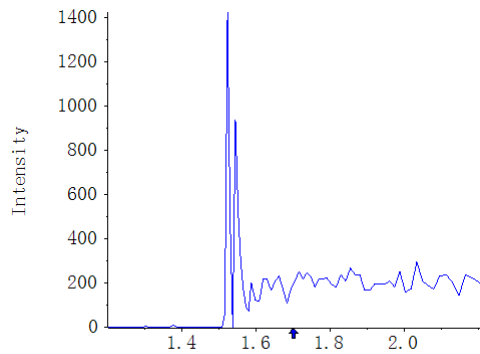

V1.0\_MWMS\_20211021\_1

(-)-Gallocatechin AREA:4.93e5  
S/N:108.8

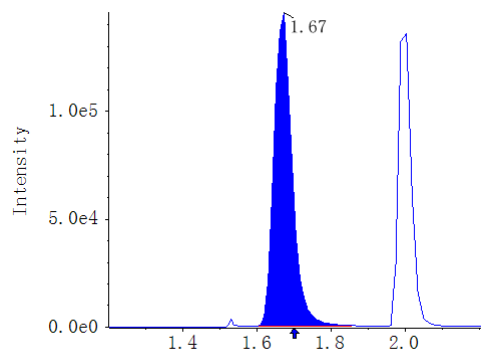

A21233250b\_b

(-)-Gallocatechin AREA:3.23e4  
S/N:27.0

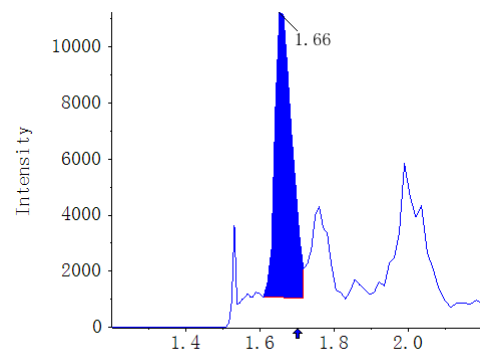

A21233251b\_b

(-)-Gallocatechin AREA:9.56e3  
S/N:11.3

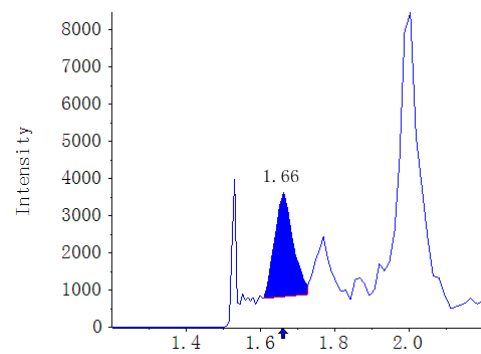

A21233252b\_b

(-)-Gallocatechin AREA:5.62e3  
S/N:11.4

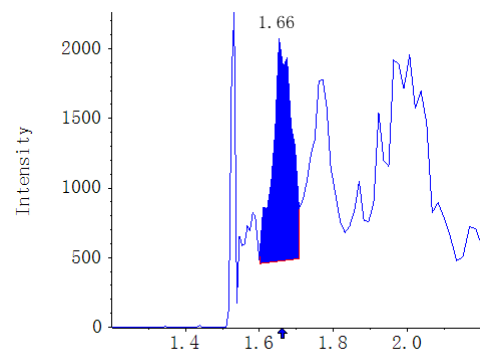

A21233253b\_b

(-)-Gallocatechin AREA:1.42e4  
S/N:9.2

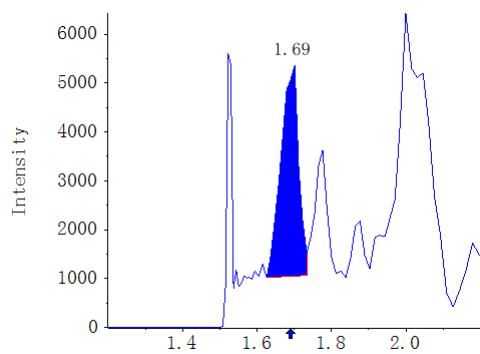

A21233254b\_b

(-)-Gallocatechin AREA:1.94e4  
S/N:12.3

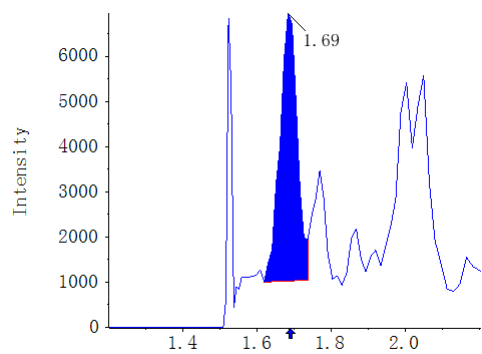

A21233255b\_b

(-)-Gallocatechin AREA:1.81e4  
S/N:15.1

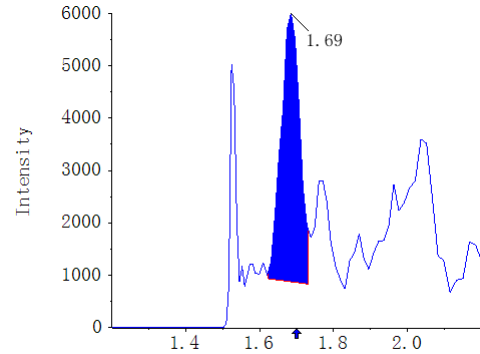

A21233256b\_b

(-)-Gallocatechin AREA:2.49e4  
S/N:10.3

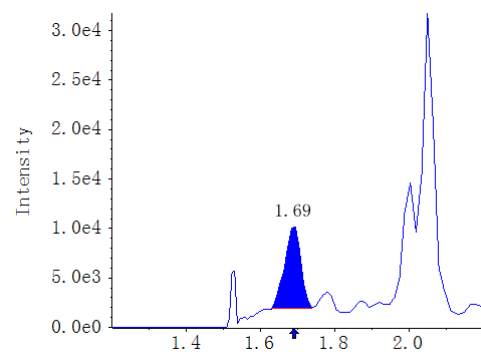

A21233257b\_b

(-)-Gallocatechin AREA:1.79e4  
S/N:11.1

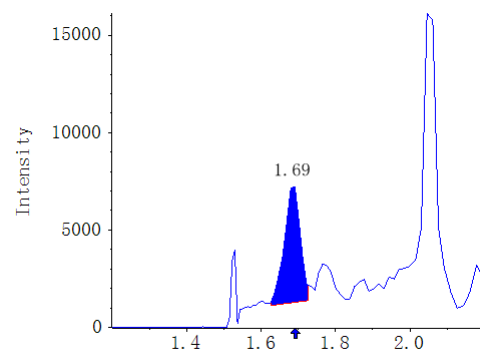

**A21233258b\_b**

(-)-Gallocatechin AREA:3.73e4  
S/N:16.4

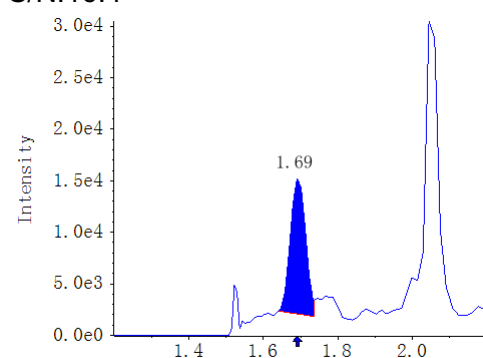

**A21233259b\_b**

(-)-Gallocatechin AREA:2.66e4  
S/N:21.4

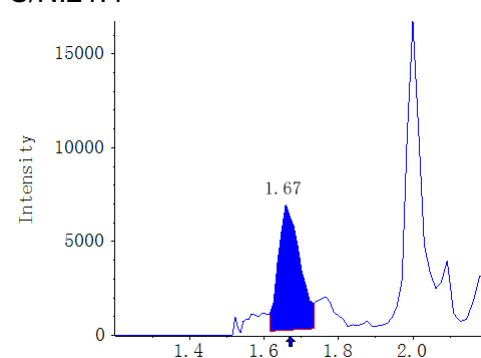

**A21233260b\_b**

(-)-Gallocatechin AREA:3.36e4  
S/N:21.3

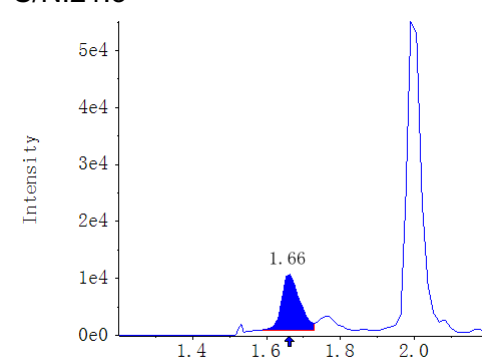

**A21233261b\_b**

(-)-Gallocatechin AREA:1.34e5  
S/N:37.5

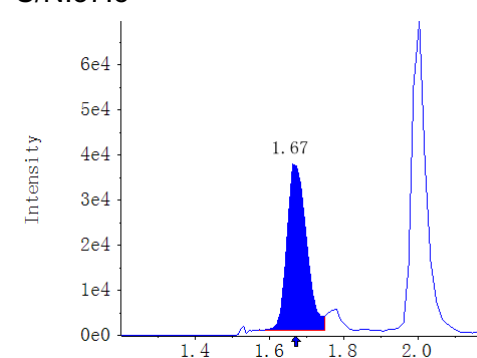

**A21233262b\_b**

(-)-Gallocatechin AREA:1.37e4  
S/N:8.5

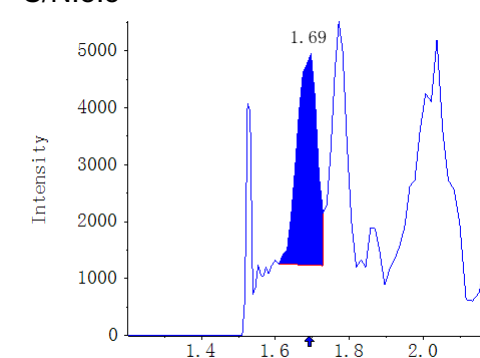

**A21233263b\_b**

(-)-Gallocatechin AREA:1.84e4  
S/N:8.5

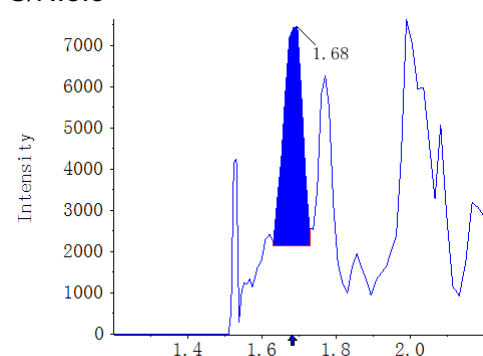

**A21233264b\_b**

(-)-Gallocatechin AREA:1.73e4  
S/N:8.9

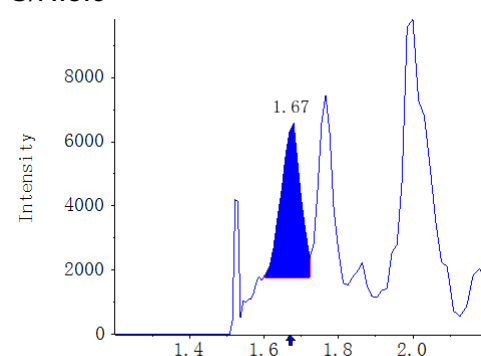

**A21233265b\_b**

(-)-Gallocatechin AREA:1.62e4  
S/N:10.1

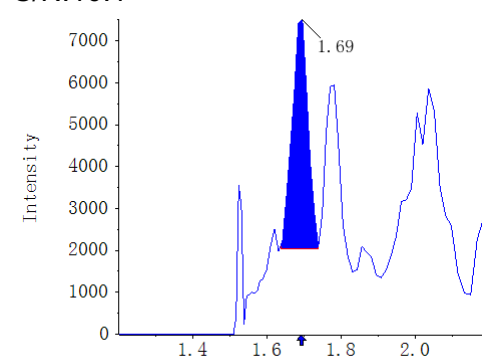

**A21233266b\_b**

(-)-Gallocatechin AREA:1.05e4  
S/N:8.6

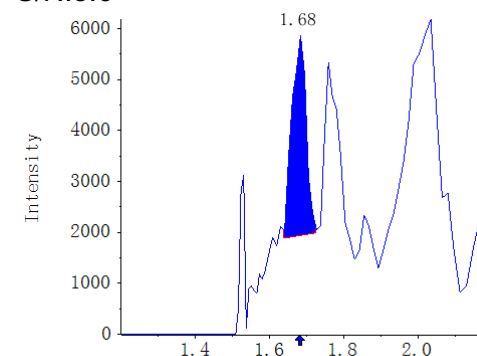

**A21233267b\_b**

(-)-Gallocatechin AREA:1.84e4  
S/N:11.4

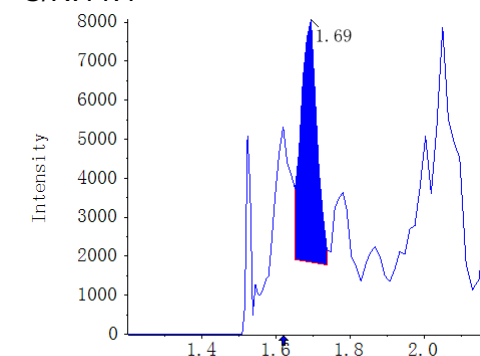

|                    |                                                    |                 |                      |
|--------------------|----------------------------------------------------|-----------------|----------------------|
| Result Table       | MWXS-21-2101D-3_18_WH6500-5_A20-3_V1.0_TY_20211028 | Algorithm Used  | MQ4                  |
| Acquisition Method | Flavonoids_V1.0_WH6500-5_LT_20211025.dam           | Instrument Name | QTRAP 6500+ Low Mass |
| Project            | N/A                                                | Analytes QTY    | 204:163              |

**Compound name: Isorhamnetin 3-O-glucoside (477.1 / 314.1)**

| Sample Name           | Sample Type     | Area (cps) | Is Area (cps) | RT (min) | S/N   | Target Conc | Calculated Conc.() |
|-----------------------|-----------------|------------|---------------|----------|-------|-------------|--------------------|
| STD_0.5nM             | Standard        | 3.85e3     | N/A           | 3.04     | 33.0  | 0.5000      | 3.113017e-1        |
| STD_1nM               | Standard        | 1.23e4     | N/A           | 3.03     | 64.4  | 1.0000      | 1.038809e0         |
| STD_5nM               | Standard        | 7.73e4     | N/A           | 3.04     | 98.2  | 5.0000      | 6.651810e0         |
| STD_10nM              | Standard        | 1.16e5     | N/A           | 3.03     | 197.3 | 10.0000     | 1.001918e1         |
| STD_20nM              | Standard        | 2.23e5     | N/A           | 3.03     | 375.7 | 20.0000     | 1.920388e1         |
| STD_50nM              | Standard        | 6.19e5     | N/A           | 3.03     | 323.5 | 50.0000     | 5.339997e1         |
| STD_100nM             | Standard        | 1.16e6     | N/A           | 3.04     | 298.8 | 100.0000    | 9.974778e1         |
| STD_200nM             | Standard        | 2.27e6     | N/A           | 3.03     | 292.7 | 200.0000    | 1.961273e2         |
| STD_500nM             | Standard        | N/A        | N/A           | N/A      | N/A   | 500.0000    | N/A                |
| STD_1000nM            | Standard        | N/A        | N/A           | N/A      | N/A   | 1000.0000   | N/A                |
| STD_2000nM            | Standard        | N/A        | N/A           | N/A      | N/A   | 2000.0000   | N/A                |
| V1.0_MW_RQC1_20211018 | Quality Control | 7.81e5     | N/A           | 3.02     | 44.4  | 0.0000      | 6.734375e1         |
| Blank                 | Unknown         | N/A        | N/A           | N/A      | N/A   | N/A         | N/A                |
| V1.0_MWMS_20211021_1  | Unknown         | 2.10e6     | N/A           | 3.05     | 332.0 | N/A         | 1.807994e2         |
| MWXS212101D3_R1       | Quality Control | 2.14e6     | N/A           | 3.04     | 326.8 | 0.0000      | 1.844823e2         |
| MWXS212101D3_R2       | Quality Control | 2.09e6     | N/A           | 3.05     | 378.3 | 0.0000      | 1.799764e2         |
| MWXS212101D3_R3       | Quality Control | 1.98e6     | N/A           | 3.05     | 322.7 | 0.0000      | 1.705918e2         |
| A21233250b_b          | Unknown         | 7.27e3     | N/A           | 3.04     | 10.2  | N/A         | 6.065366e-1        |
| A21233251b_b          | Unknown         | 2.53e3     | N/A           | 3.06     | 9.4   | N/A         | 1.979938e-1        |
| A21233252b_b          | Unknown         | 1.88e3     | N/A           | 3.04     | 8.7   | N/A         | 1.412089e-1        |
| A21233253b_b          | Unknown         | 1.20e4     | N/A           | 3.04     | 19.6  | N/A         | 1.012767e0         |
| A21233254b_b          | Unknown         | N/A        | N/A           | N/A      | N/A   | N/A         | N/A                |
| A21233255b_b          | Unknown         | N/A        | N/A           | N/A      | N/A   | N/A         | N/A                |
| A21233256b_b          | Unknown         | 5.29e3     | N/A           | 3.05     | 10.1  | N/A         | 4.357080e-1        |
| A21233257b_b          | Unknown         | N/A        | N/A           | N/A      | N/A   | N/A         | N/A                |
| A21233258b_b          | Unknown         | N/A        | N/A           | N/A      | N/A   | N/A         | N/A                |
| A21233259b_b          | Unknown         | N/A        | N/A           | N/A      | N/A   | N/A         | N/A                |
| A21233260b_b          | Unknown         | 3.69e3     | N/A           | 3.04     | 9.5   | N/A         | 2.980190e-1        |
| A21233261b_b          | Unknown         | 2.36e3     | N/A           | 3.03     | 8.3   | N/A         | 1.834247e-1        |
| A21233262b_b          | Unknown         | 3.08e3     | N/A           | 3.04     | 7.5   | N/A         | 2.452467e-1        |
| A21233263b_b          | Unknown         | N/A        | N/A           | N/A      | N/A   | N/A         | N/A                |
| A21233264b_b          | Unknown         | N/A        | N/A           | N/A      | N/A   | N/A         | N/A                |
| A21233265b_b          | Unknown         | N/A        | N/A           | N/A      | N/A   | N/A         | N/A                |
| A21233266b_b          | Unknown         | N/A        | N/A           | N/A      | N/A   | N/A         | N/A                |
| A21233267b_b          | Unknown         | N/A        | N/A           | N/A      | N/A   | N/A         | N/A                |

Compound name: Isorhamnetin 3-O-glucoside  
Regression Equation:  $y = 11590.52408x + 238.59017$  ( $r = 0.99870$ ) (weighting:  $1/x$ )

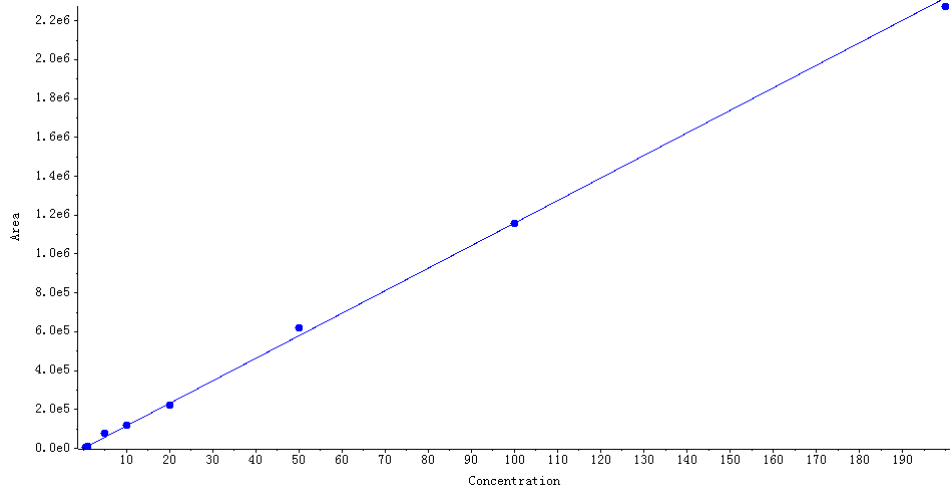

Peak Review

Blank  
Isorhamnetin 3-O-glucoside  
AREA:N/A S/N:N/A

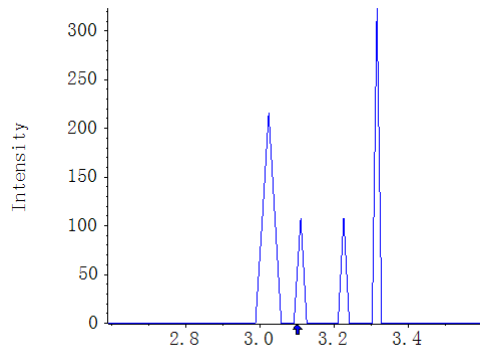

V1.0\_MWMS\_20211021\_1  
Isorhamnetin 3-O-glucoside  
AREA:2.10e6 S/N:332.0

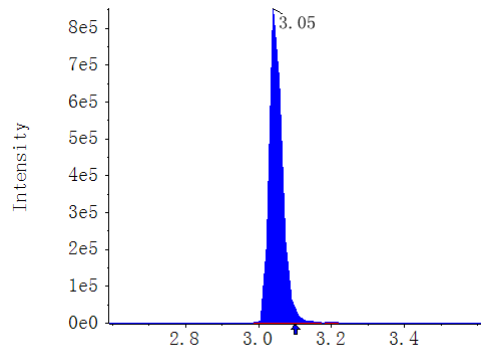

A21233250b\_b  
Isorhamnetin 3-O-glucoside  
AREA:7.27e3 S/N:10.2

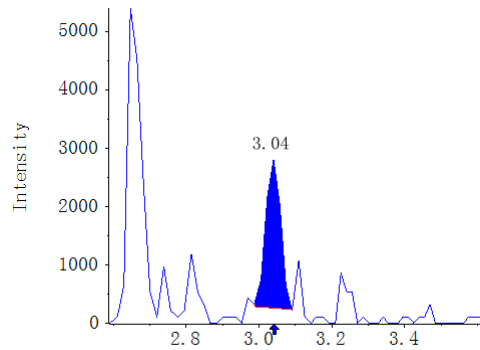

A21233251b\_b  
Isorhamnetin 3-O-glucoside  
AREA:2.53e3 S/N:9.4

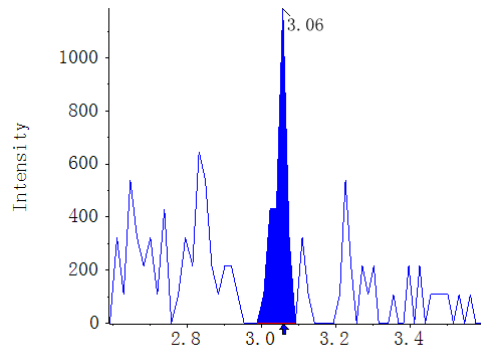

A21233252b\_b  
Isorhamnetin 3-O-glucoside  
AREA:1.88e3 S/N:8.7

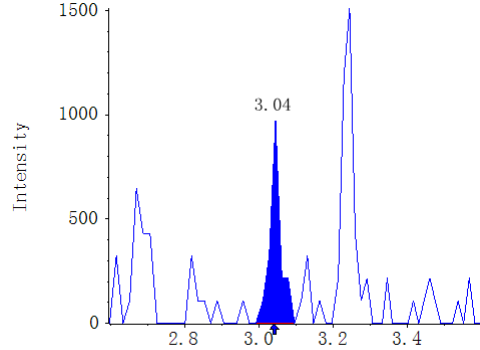

A21233253b\_b  
Isorhamnetin 3-O-glucoside  
AREA:1.20e4 S/N:19.6

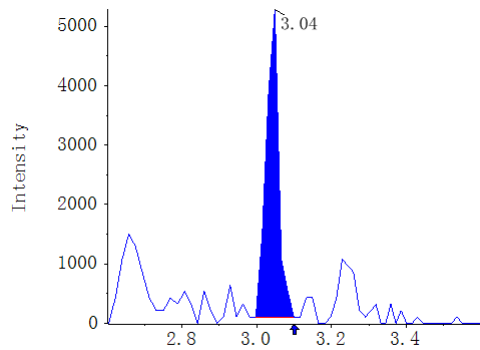

A21233254b\_b  
Isorhamnetin 3-O-glucoside  
AREA:N/A S/N:N/A

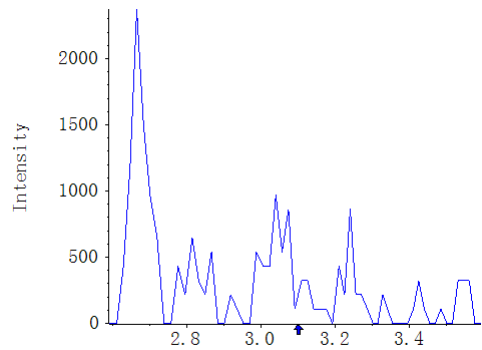

A21233255b\_b  
Isorhamnetin 3-O-glucoside  
AREA:N/A S/N:N/A

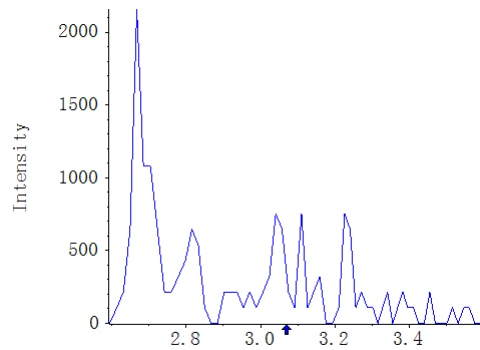

A21233256b\_b  
Isorhamnetin 3-O-glucoside  
AREA:5.29e3 S/N:10.1

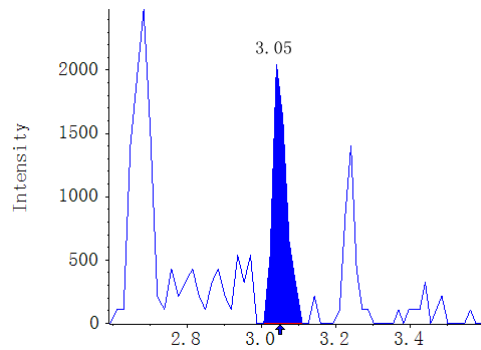

A21233257b\_b  
Isorhamnetin 3-O-glucoside  
AREA:N/A S/N:N/A

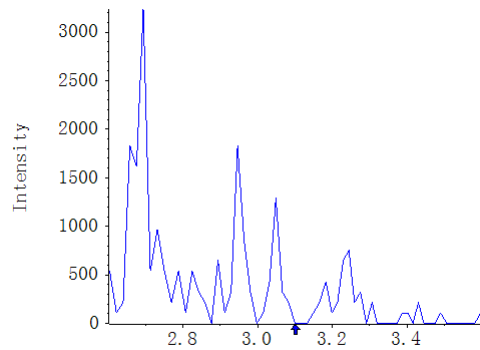

**A21233258b\_b**  
Isorhamnetin 3-O-glucoside  
AREA:N/A S/N:N/A

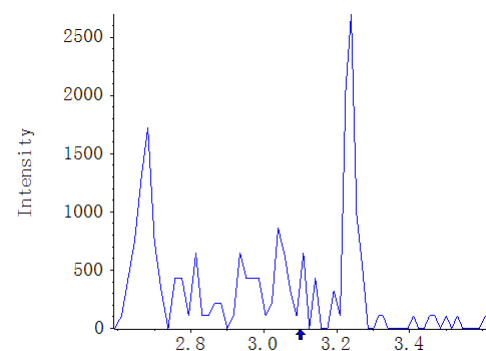

**A21233259b\_b**  
Isorhamnetin 3-O-glucoside  
AREA:N/A S/N:N/A

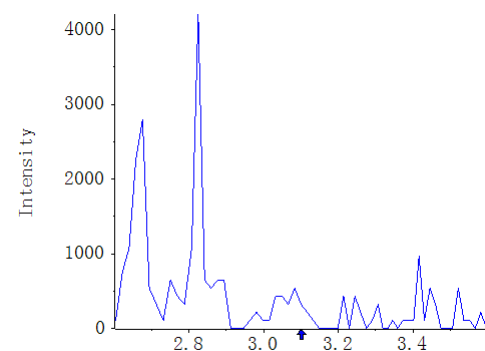

**A21233260b\_b**  
Isorhamnetin 3-O-glucoside  
AREA:3.69e3 S/N:9.5

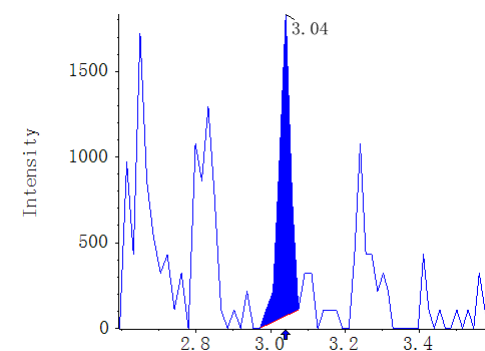

**A21233261b\_b**  
Isorhamnetin 3-O-glucoside  
AREA:2.36e3 S/N:8.3

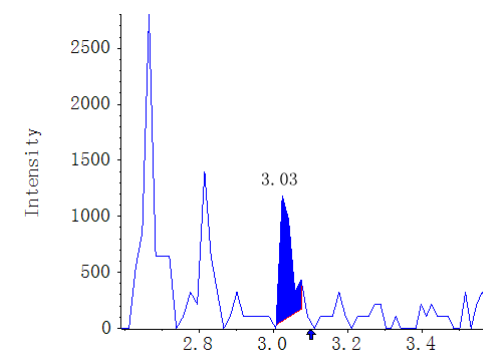

**A21233262b\_b**  
Isorhamnetin 3-O-glucoside  
AREA:3.08e3 S/N:7.5

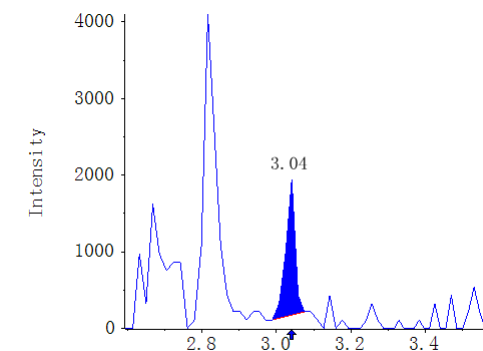

**A21233263b\_b**  
Isorhamnetin 3-O-glucoside  
AREA:N/A S/N:N/A

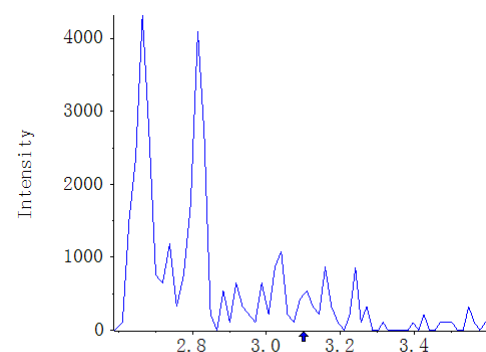

**A21233264b\_b**  
Isorhamnetin 3-O-glucoside  
AREA:N/A S/N:N/A

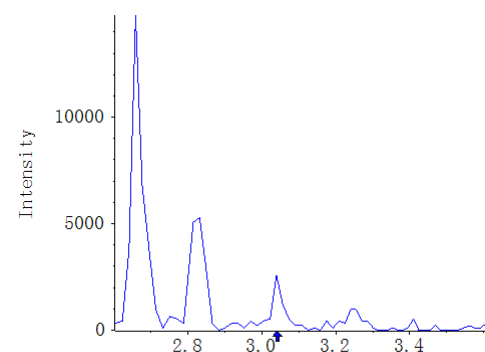

**A21233265b\_b**  
Isorhamnetin 3-O-glucoside  
AREA:N/A S/N:N/A

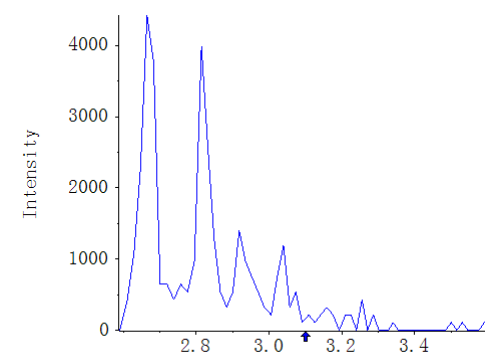

**A21233266b\_b**  
Isorhamnetin 3-O-glucoside  
AREA:N/A S/N:N/A

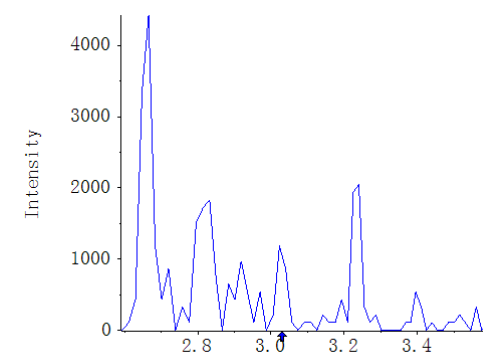

**A21233267b\_b**  
Isorhamnetin 3-O-glucoside  
AREA:N/A S/N:N/A

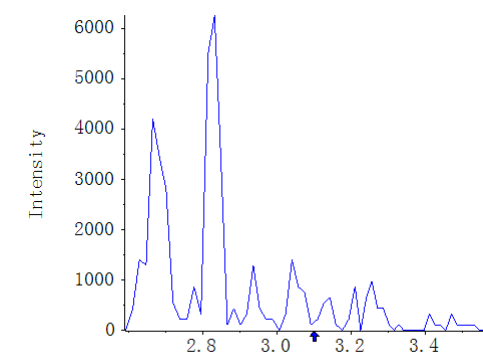

|                    |                                                    |                 |                      |
|--------------------|----------------------------------------------------|-----------------|----------------------|
| Result Table       | MWXS-21-2101D-3_18_WH6500-5_A20-3_V1.0_TY_20211028 | Algorithm Used  | MQ4                  |
| Acquisition Method | Flavonoids_V1.0_WH6500-5_LT_20211025.dam           | Instrument Name | QTRAP 6500+ Low Mass |
| Project            | N/A                                                | Analytes QTY    | 204:165              |

**Compound name: Trilobatin (435.1 / 273.1)**

| Sample Name           | Sample Type     | Area (cps) | Is Area (cps) | RT (min) | S/N  | Target Conc | Calculated Conc.() |
|-----------------------|-----------------|------------|---------------|----------|------|-------------|--------------------|
| STD_0.5nM             | Standard        | 1.22e3     | N/A           | 3.52     | 6.6  | 0.0500      | 3.179684e-2        |
| STD_1nM               | Standard        | 2.60e3     | N/A           | 3.51     | 9.7  | 0.1000      | 8.266246e-2        |
| STD_5nM               | Standard        | 1.91e4     | N/A           | 3.50     | 27.9 | 0.5000      | 6.879959e-1        |
| STD_10nM              | Standard        | 3.33e4     | N/A           | 3.51     | 25.3 | 1.0000      | 1.213326e0         |
| STD_20nM              | Standard        | 5.43e4     | N/A           | 3.50     | 28.6 | 2.0000      | 1.985017e0         |
| STD_50nM              | Standard        | 1.36e5     | N/A           | 3.51     | 21.2 | 5.0000      | 5.007706e0         |
| STD_100nM             | Standard        | 2.57e5     | N/A           | 3.51     | 21.6 | 10.0000     | 9.439926e0         |
| STD_200nM             | Standard        | 5.49e5     | N/A           | 3.50     | 23.3 | 20.0000     | 2.020157e1         |
| STD_500nM             | Standard        | N/A        | N/A           | N/A      | N/A  | 50.0000     | N/A                |
| STD_1000nM            | Standard        | N/A        | N/A           | N/A      | N/A  | 100.0000    | N/A                |
| STD_2000nM            | Standard        | N/A        | N/A           | N/A      | N/A  | 200.0000    | N/A                |
| V1.0_MW_RQC1_20211018 | Quality Control | 1.10e4     | N/A           | 3.50     | 4.4  | 0.0000      | 3.898937e-1        |
| Blank                 | Unknown         | N/A        | N/A           | N/A      | N/A  | N/A         | N/A                |
| V1.0_MWMS_20211021_1  | Unknown         | 4.60e5     | N/A           | 3.52     | 24.1 | N/A         | 1.689768e1         |
| MWXS212101D3_R1       | Quality Control | 4.68e5     | N/A           | 3.52     | 30.7 | 0.0000      | 1.721566e1         |
| MWXS212101D3_R2       | Quality Control | 4.59e5     | N/A           | 3.52     | 28.7 | 0.0000      | 1.686847e1         |
| MWXS212101D3_R3       | Quality Control | 4.68e5     | N/A           | 3.51     | 35.0 | 0.0000      | 1.719868e1         |
| A21233250b_b          | Unknown         | N/A        | N/A           | N/A      | N/A  | N/A         | N/A                |
| A21233251b_b          | Unknown         | N/A        | N/A           | N/A      | N/A  | N/A         | N/A                |
| A21233252b_b          | Unknown         | N/A        | N/A           | N/A      | N/A  | N/A         | N/A                |
| A21233253b_b          | Unknown         | 1.95e4     | N/A           | 3.52     | 2.4  | N/A         | 7.035078e-1        |
| A21233254b_b          | Unknown         | 2.19e4     | N/A           | 3.52     | 2.9  | N/A         | 7.919260e-1        |
| A21233255b_b          | Unknown         | 2.20e4     | N/A           | 3.51     | 2.6  | N/A         | 7.981137e-1        |
| A21233256b_b          | Unknown         | 6.94e4     | N/A           | 3.52     | 4.3  | N/A         | 2.540351e0         |
| A21233257b_b          | Unknown         | 7.61e4     | N/A           | 3.52     | 4.0  | N/A         | 2.785671e0         |
| A21233258b_b          | Unknown         | 5.85e4     | N/A           | 3.52     | 3.8  | N/A         | 2.139559e0         |
| A21233259b_b          | Unknown         | N/A        | N/A           | N/A      | N/A  | N/A         | N/A                |
| A21233260b_b          | Unknown         | N/A        | N/A           | N/A      | N/A  | N/A         | N/A                |
| A21233261b_b          | Unknown         | N/A        | N/A           | N/A      | N/A  | N/A         | N/A                |
| A21233262b_b          | Unknown         | 7.20e3     | N/A           | 3.52     | 2.2  | N/A         | 2.517006e-1        |
| A21233263b_b          | Unknown         | 2.50e4     | N/A           | 3.51     | 2.2  | N/A         | 9.059338e-1        |
| A21233264b_b          | Unknown         | 2.10e4     | N/A           | 3.52     | 3.1  | N/A         | 7.605706e-1        |
| A21233265b_b          | Unknown         | 7.72e4     | N/A           | 3.52     | 3.3  | N/A         | 2.828626e0         |
| A21233266b_b          | Unknown         | 2.54e4     | N/A           | 3.51     | 1.4  | N/A         | 9.232907e-1        |
| A21233267b_b          | Unknown         | 3.29e4     | N/A           | 3.53     | 1.9  | N/A         | 1.198098e0         |

Compound name: Trilobatin  
Regression Equation:  $y = 27176.15984x + 357.05743$  ( $r = 0.99784$ ) (weighting:  $1/x$ )

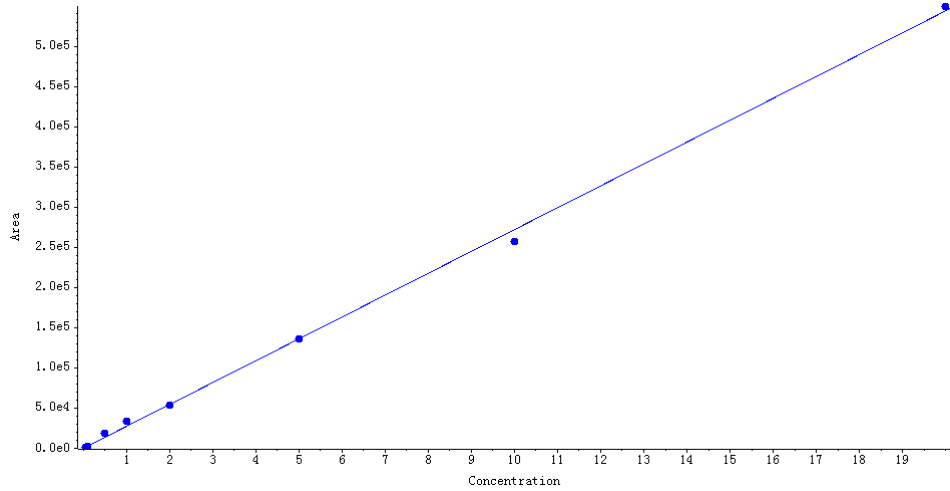

Peak Review

Blank

Trilobatin AREA:N/A S/N:N/A

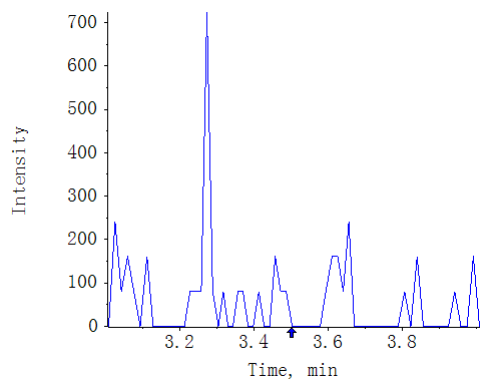

V1.0\_MWMS\_20211021\_1

Trilobatin AREA:4.60e5 S/N:24.1

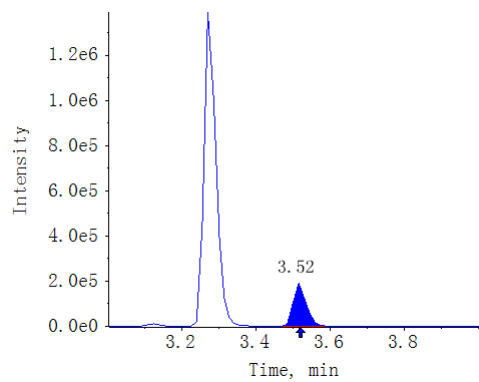

A21233250b\_b

Trilobatin AREA:N/A S/N:N/A

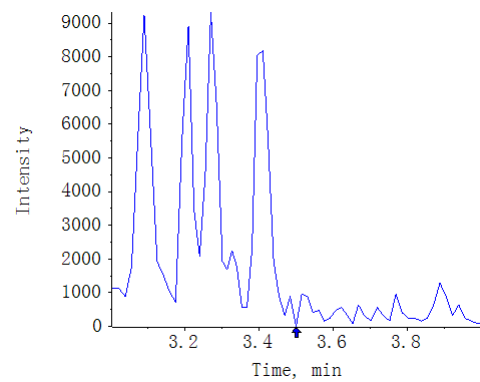

A21233251b\_b

Trilobatin AREA:N/A S/N:N/A

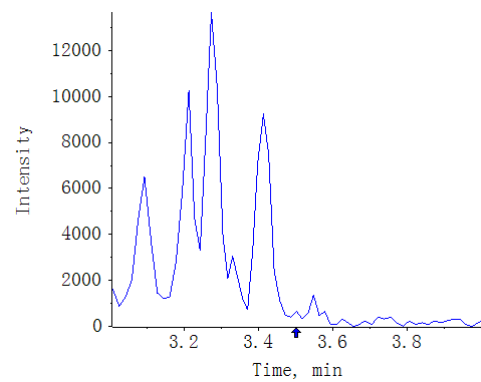

A21233252b\_b

Trilobatin AREA:N/A S/N:N/A

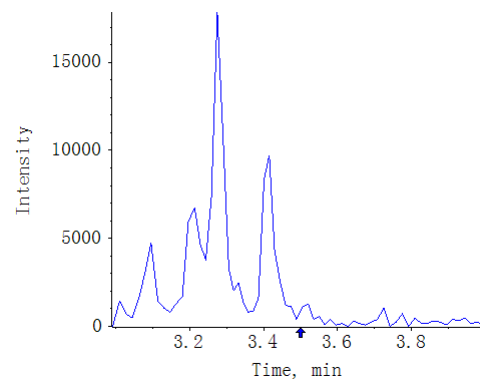

A21233253b\_b

Trilobatin AREA:1.95e4 S/N:2.4

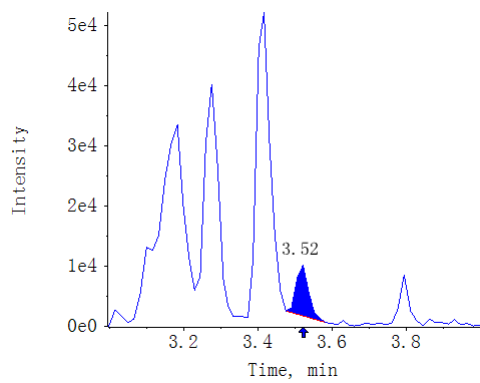

A21233254b\_b

Trilobatin AREA:2.19e4 S/N:2.9

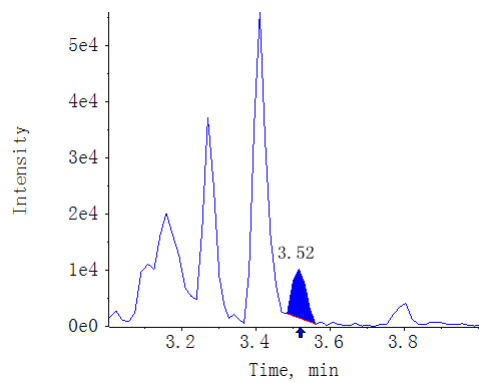

A21233255b\_b

Trilobatin AREA:2.20e4 S/N:2.6

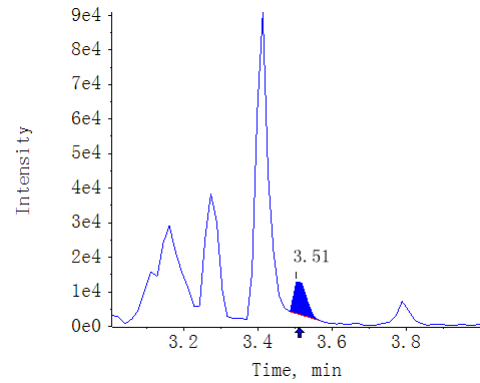

A21233256b\_b

Trilobatin AREA:6.94e4 S/N:4.3

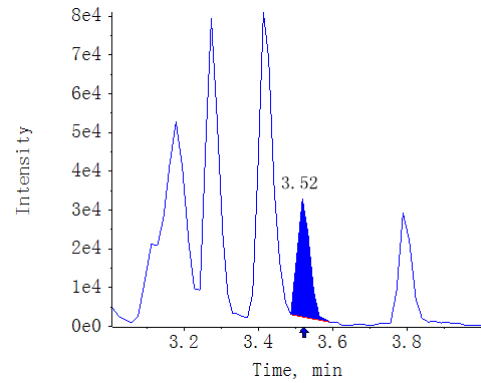

A21233257b\_b

Trilobatin AREA:7.61e4 S/N:4.0

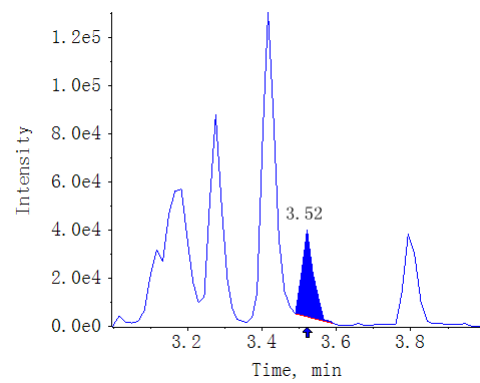

**A21233258b\_b**  
Trilobatin AREA:5.85e4 S/N:3.8

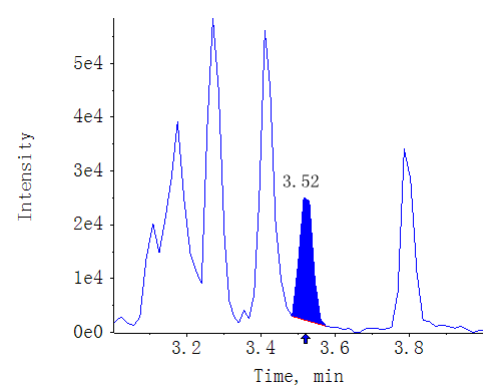

**A21233259b\_b**  
Trilobatin AREA:N/A S/N:N/A

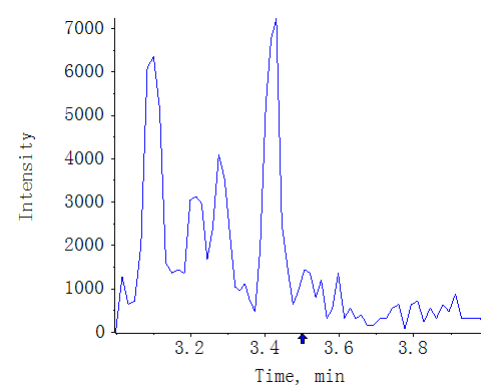

**A21233260b\_b**  
Trilobatin AREA:N/A S/N:N/A

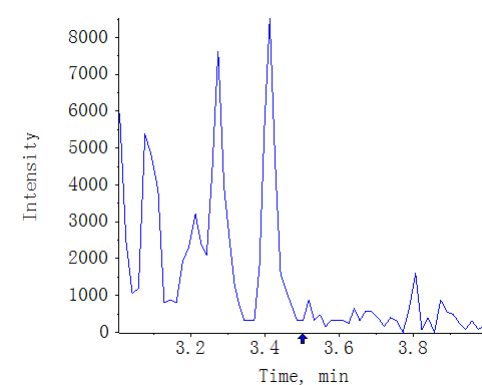

**A21233261b\_b**  
Trilobatin AREA:N/A S/N:N/A

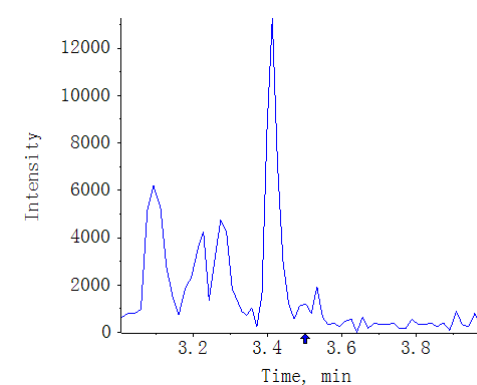

**A21233262b\_b**  
Trilobatin AREA:7.20e3 S/N:2.2

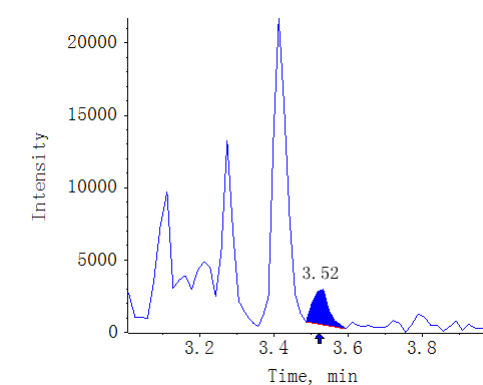

**A21233263b\_b**  
Trilobatin AREA:2.50e4 S/N:2.2

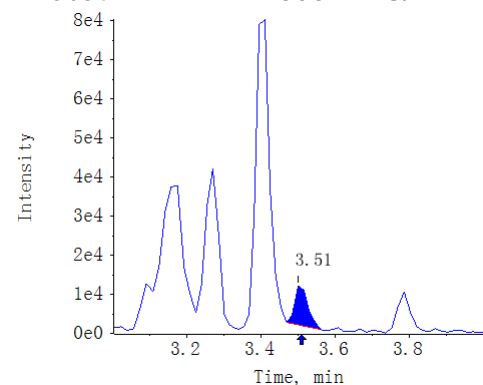

**A21233264b\_b**  
Trilobatin AREA:2.10e4 S/N:3.1

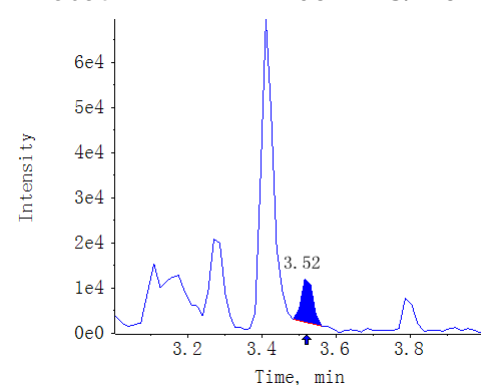

**A21233265b\_b**  
Trilobatin AREA:7.72e4 S/N:3.3

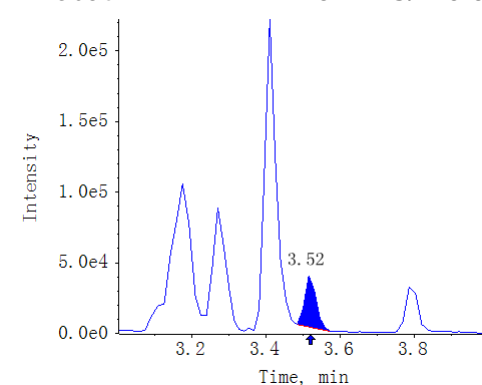

**A21233266b\_b**  
Trilobatin AREA:2.54e4 S/N:1.4

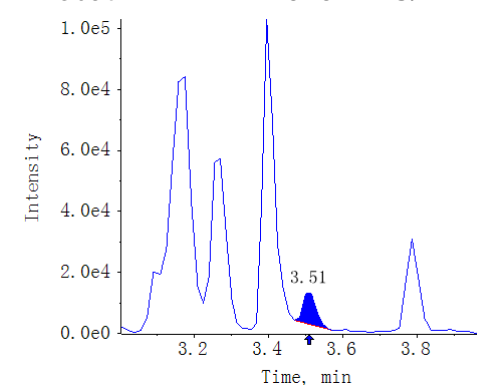

**A21233267b\_b**  
Trilobatin AREA:3.29e4 S/N:1.9

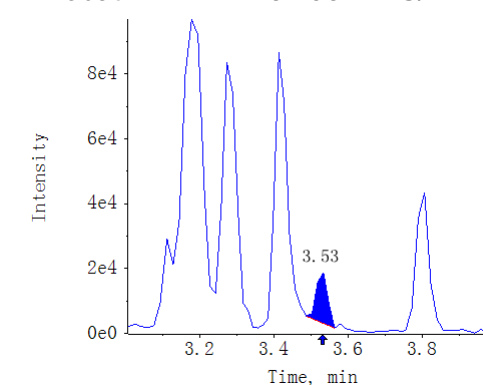

|                    |                                                    |                 |                      |
|--------------------|----------------------------------------------------|-----------------|----------------------|
| Result Table       | MWXS-21-2101D-3_18_WH6500-5_A20-3_V1.0_TY_20211028 | Algorithm Used  | MQ4                  |
| Acquisition Method | Flavonoids_V1.0_WH6500-5_LT_20211025.dam           | Instrument Name | QTRAP 6500+ Low Mass |
| Project            | N/A                                                | Analytes QTY    | 204:166              |

**Compound name: Sieboldin (451.1 / 289.1)**

| Sample Name           | Sample Type     | Area (cps) | Is Area (cps) | RT (min) | S/N   | Target Conc | Calculated Conc.() |
|-----------------------|-----------------|------------|---------------|----------|-------|-------------|--------------------|
| STD_0.5nM             | Standard        | N/A        | N/A           | N/A      | N/A   | 0.0250      | N/A                |
| STD_1nM               | Standard        | 6.92e2     | N/A           | 3.02     | 5.4   | 0.0500      | 4.008493e-2        |
| STD_5nM               | Standard        | 3.63e3     | N/A           | 3.01     | 27.1  | 0.2500      | 3.498435e-1        |
| STD_10nM              | Standard        | 4.01e3     | N/A           | 3.02     | 17.3  | 0.5000      | 3.894803e-1        |
| STD_20nM              | Standard        | 9.39e3     | N/A           | 3.01     | 33.6  | 1.0000      | 9.558860e-1        |
| STD_50nM              | Standard        | 2.55e4     | N/A           | 3.02     | 75.3  | 2.5000      | 2.650181e0         |
| STD_100nM             | Standard        | 4.90e4     | N/A           | 3.02     | 115.6 | 5.0000      | 5.125559e0         |
| STD_200nM             | Standard        | 9.33e4     | N/A           | 3.02     | 185.0 | 10.0000     | 9.788965e0         |
| STD_500nM             | Standard        | N/A        | N/A           | N/A      | N/A   | 25.0000     | N/A                |
| STD_1000nM            | Standard        | N/A        | N/A           | N/A      | N/A   | 50.0000     | N/A                |
| STD_2000nM            | Standard        | N/A        | N/A           | N/A      | N/A   | 100.0000    | N/A                |
| V1.0_MW_RQC1_20211018 | Quality Control | N/A        | N/A           | N/A      | N/A   | 0.0000      | N/A                |
| Blank                 | Unknown         | N/A        | N/A           | N/A      | N/A   | N/A         | N/A                |
| V1.0_MWMS_20211021_1  | Unknown         | 1.04e5     | N/A           | 3.03     | 129.3 | N/A         | 1.087916e1         |
| MWXS212101D3_R1       | Quality Control | 1.05e5     | N/A           | 3.03     | 147.2 | 0.0000      | 1.102168e1         |
| MWXS212101D3_R2       | Quality Control | 1.15e5     | N/A           | 3.03     | 138.4 | 0.0000      | 1.210400e1         |
| MWXS212101D3_R3       | Quality Control | 1.10e5     | N/A           | 3.03     | 151.3 | 0.0000      | 1.151412e1         |
| A21233250b_b          | Unknown         | 1.10e4     | N/A           | 3.04     | 3.4   | N/A         | 1.130458e0         |
| A21233251b_b          | Unknown         | 8.42e3     | N/A           | 3.05     | 3.1   | N/A         | 8.542608e-1        |
| A21233252b_b          | Unknown         | N/A        | N/A           | N/A      | N/A   | N/A         | N/A                |
| A21233253b_b          | Unknown         | N/A        | N/A           | N/A      | N/A   | N/A         | N/A                |
| A21233254b_b          | Unknown         | N/A        | N/A           | N/A      | N/A   | N/A         | N/A                |
| A21233255b_b          | Unknown         | 1.89e4     | N/A           | 3.05     | 4.1   | N/A         | 1.957854e0         |
| A21233256b_b          | Unknown         | 2.08e5     | N/A           | 3.01     | 25.5  | N/A         | 2.182624e1         |
| A21233257b_b          | Unknown         | 2.17e5     | N/A           | 3.01     | 21.9  | N/A         | 2.279695e1         |
| A21233258b_b          | Unknown         | 1.40e5     | N/A           | 3.01     | 29.0  | N/A         | 1.472782e1         |
| A21233259b_b          | Unknown         | 1.62e4     | N/A           | 3.05     | 4.1   | N/A         | 1.669916e0         |
| A21233260b_b          | Unknown         | 1.21e4     | N/A           | 3.06     | 1.5   | N/A         | 1.243929e0         |
| A21233261b_b          | Unknown         | 1.44e4     | N/A           | 3.04     | 2.3   | N/A         | 1.487044e0         |
| A21233262b_b          | Unknown         | 7.35e3     | N/A           | 3.04     | 1.7   | N/A         | 7.416132e-1        |
| A21233263b_b          | Unknown         | 1.74e4     | N/A           | 3.03     | 3.4   | N/A         | 1.803068e0         |
| A21233264b_b          | Unknown         | 1.44e4     | N/A           | 3.03     | 3.5   | N/A         | 1.483075e0         |
| A21233265b_b          | Unknown         | 1.17e5     | N/A           | 3.01     | 9.8   | N/A         | 1.223749e1         |
| A21233266b_b          | Unknown         | 7.72e4     | N/A           | 3.00     | 8.3   | N/A         | 8.094664e0         |
| A21233267b_b          | Unknown         | 1.48e5     | N/A           | 3.01     | 16.8  | N/A         | 1.559995e1         |

Compound name: Sieboldin

Regression Equation:  $y = 9496.31840x + 310.98175$  ( $r = 0.99759$ ) (weighting:  $1/x$ )

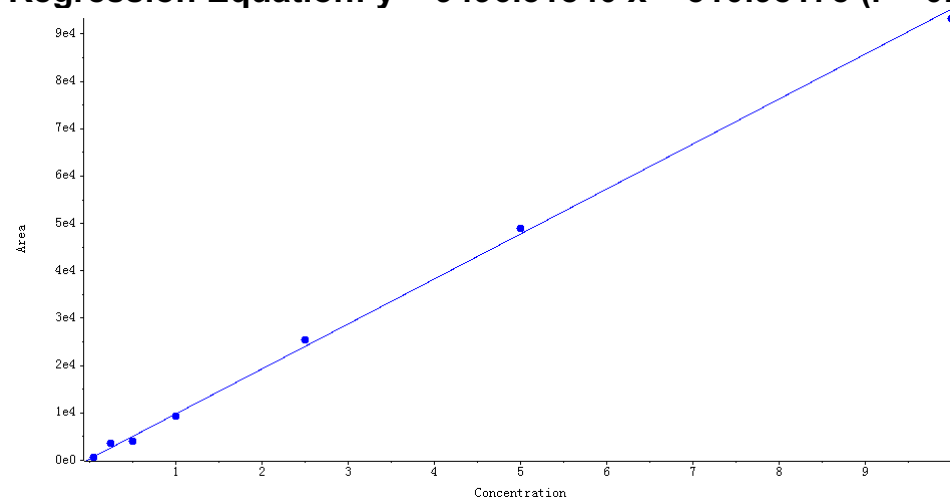

### Peak Review

Blank

Sieboldin AREA:N/A S/N:N/A

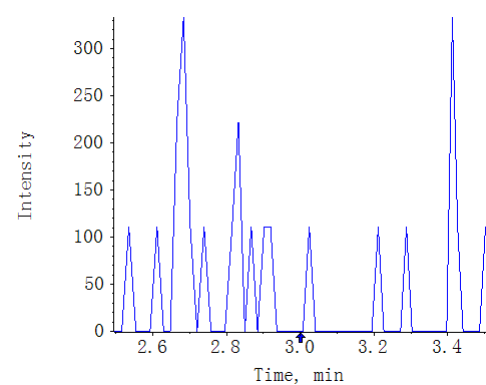

V1.0\_MWMS\_20211021\_1

Sieboldin AREA:1.04e5 S/N:129.3

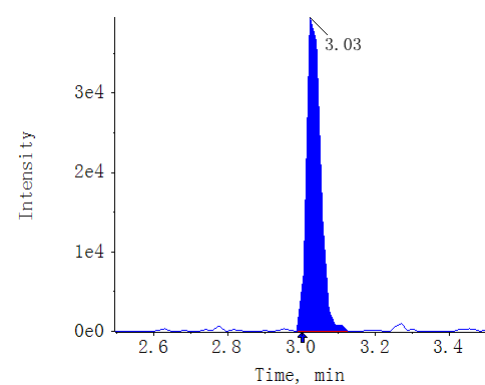

A21233250b\_b

Sieboldin AREA:1.10e4 S/N:3.4

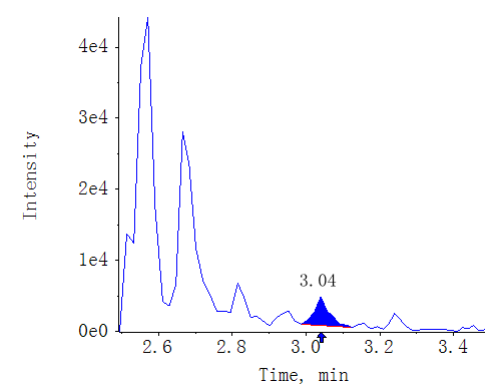

A21233251b\_b

Sieboldin AREA:8.42e3 S/N:3.1

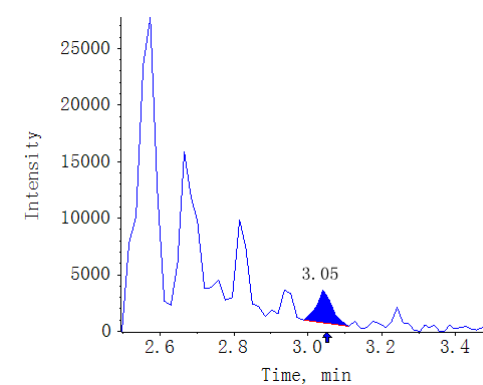

A21233252b\_b

Sieboldin AREA:N/A S/N:N/A

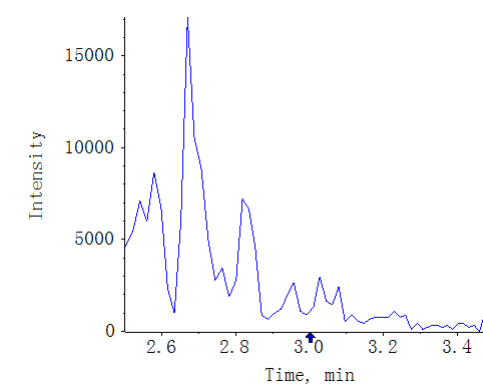

A21233253b\_b

Sieboldin AREA:N/A S/N:N/A

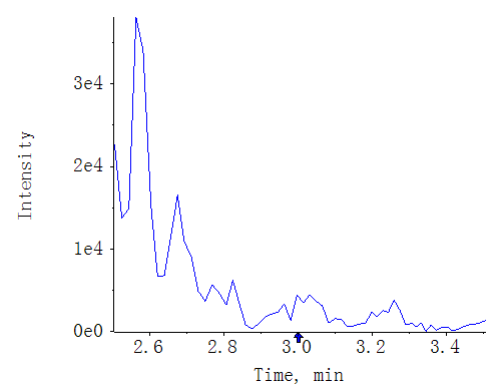

A21233254b\_b

Sieboldin AREA:N/A S/N:N/A

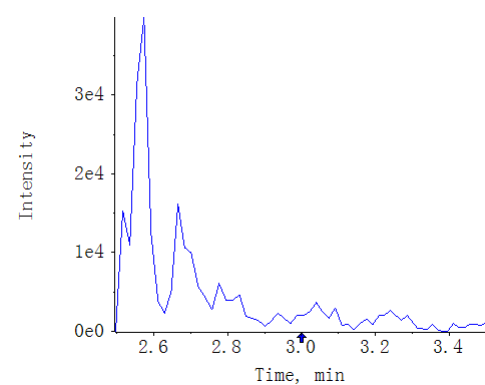

A21233255b\_b

Sieboldin AREA:1.89e4 S/N:4.1

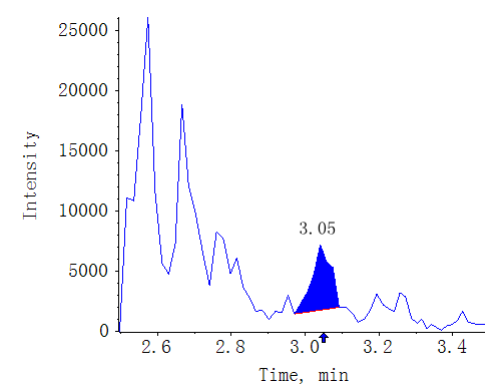

A21233256b\_b

Sieboldin AREA:2.08e5 S/N:25.5

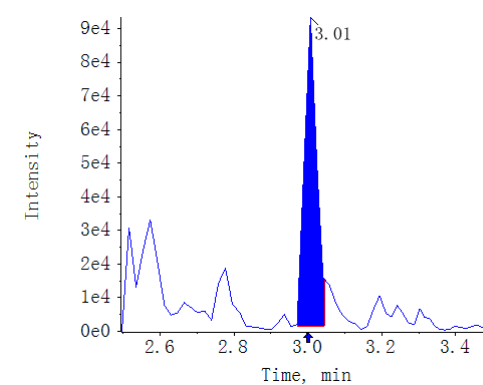

A21233257b\_b

Sieboldin AREA:2.17e5 S/N:21.9

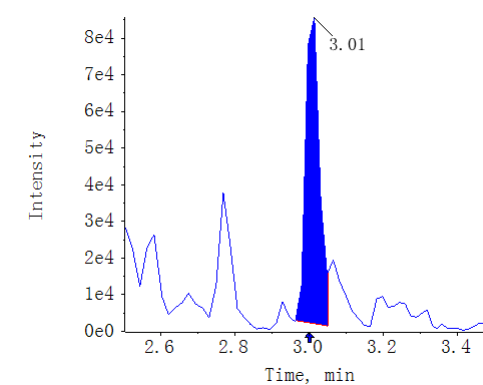

**A21233258b\_b**

Sieboldin AREA:1.40e5 S/N:29.0

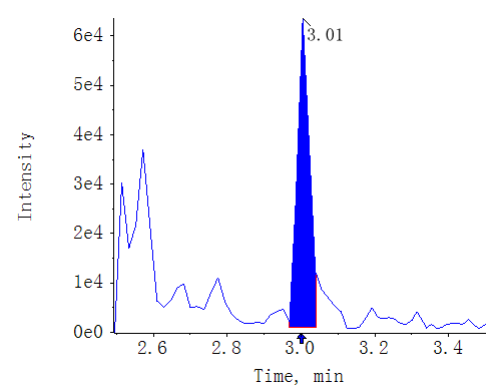

**A21233259b\_b**

Sieboldin AREA:1.62e4 S/N:4.1

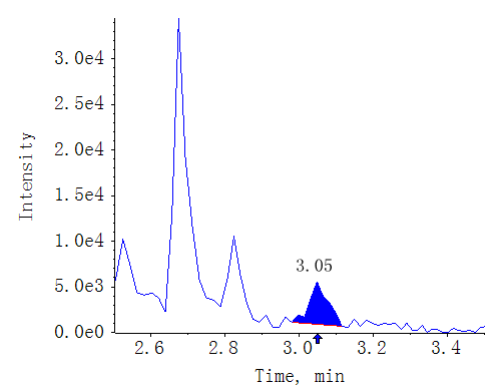

**A21233260b\_b**

Sieboldin AREA:1.21e4 S/N:1.5

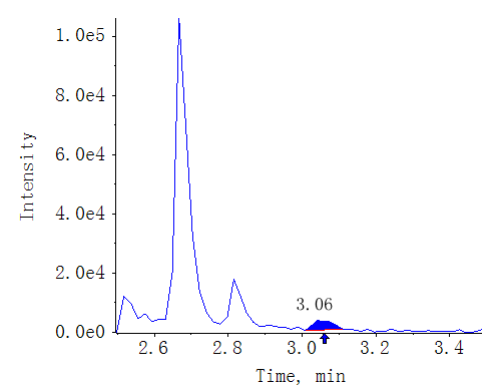

**A21233261b\_b**

Sieboldin AREA:1.44e4 S/N:2.3

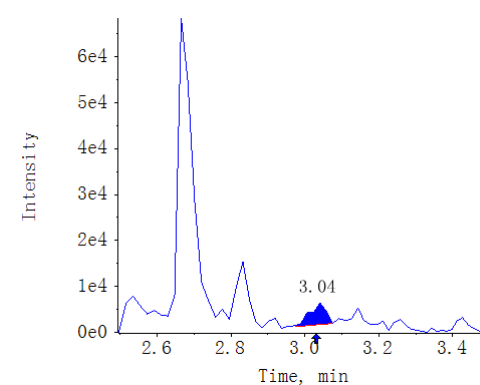

**A21233262b\_b**

Sieboldin AREA:7.35e3 S/N:1.7

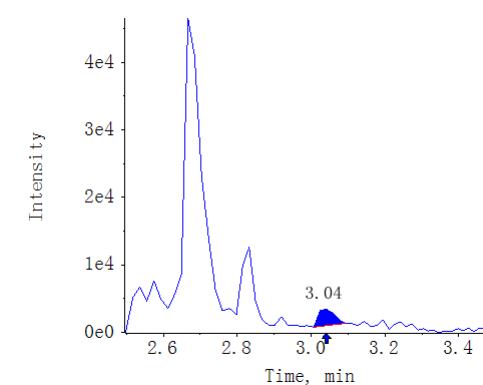

**A21233263b\_b**

Sieboldin AREA:1.74e4 S/N:3.4

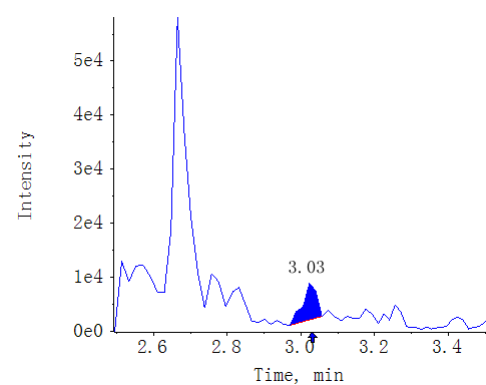

**A21233264b\_b**

Sieboldin AREA:1.44e4 S/N:3.5

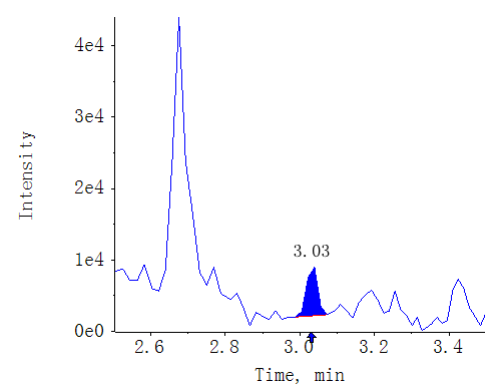

**A21233265b\_b**

Sieboldin AREA:1.17e5 S/N:9.8

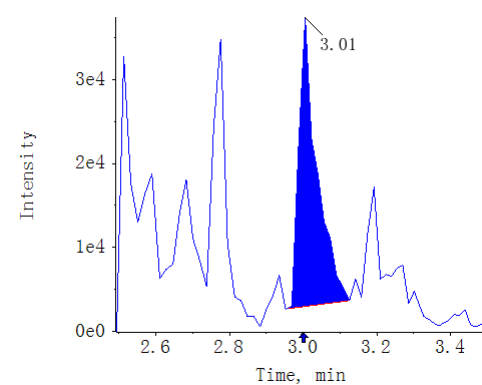

**A21233266b\_b**

Sieboldin AREA:7.72e4 S/N:8.3

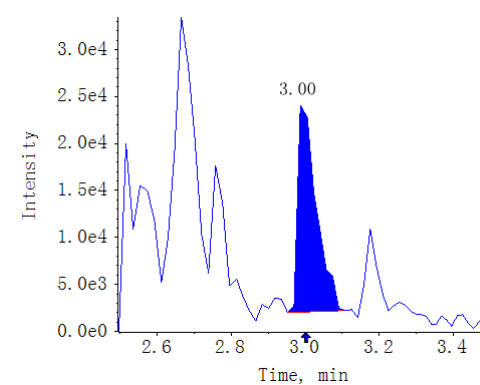

**A21233267b\_b**

Sieboldin AREA:1.48e5 S/N:16.8

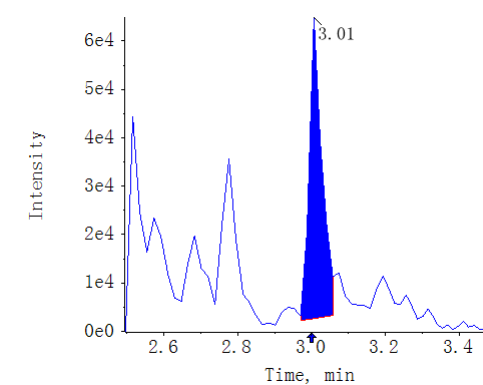

|                    |                                                    |                 |                      |
|--------------------|----------------------------------------------------|-----------------|----------------------|
| Result Table       | MWXS-21-2101D-3_18_WH6500-5_A20-3_V1.0_TY_20211028 | Algorithm Used  | MQ4                  |
| Acquisition Method | Flavonoids_V1.0_WH6500-5_LT_20211025.dam           | Instrument Name | QTRAP 6500+ Low Mass |
| Project            | N/A                                                | Analytes QTY    | 204:182              |

**Compound name: (-)-Epigallocatechin (307.1 / 139.0)**

| Sample Name           | Sample Type     | Area (cps) | Is Area (cps) | RT (min) | S/N  | Target Conc | Calculated Conc.() |
|-----------------------|-----------------|------------|---------------|----------|------|-------------|--------------------|
| STD_0.5nM             | Standard        | 1.65e3     | N/A           | 1.99     | 12.0 | 0.5000      | 4.225571e-1        |
| STD_1nM               | Standard        | 2.44e3     | N/A           | 1.99     | 12.3 | 1.0000      | 7.405467e-1        |
| STD_5nM               | Standard        | 1.82e4     | N/A           | 1.99     | 29.5 | 5.0000      | 7.113659e0         |
| STD_10nM              | Standard        | 2.53e4     | N/A           | 2.00     | 36.2 | 10.0000     | 1.001431e1         |
| STD_20nM              | Standard        | 4.82e4     | N/A           | 1.99     | 41.8 | 20.0000     | 1.926817e1         |
| STD_50nM              | Standard        | 1.28e5     | N/A           | 2.00     | 44.9 | 50.0000     | 5.170905e1         |
| STD_100nM             | Standard        | 2.51e5     | N/A           | 2.00     | 52.6 | 100.0000    | 1.012856e2         |
| STD_200nM             | Standard        | 4.84e5     | N/A           | 1.99     | 49.6 | 200.0000    | 1.959461e2         |
| STD_500nM             | Standard        | N/A        | N/A           | N/A      | N/A  | 500.0000    | N/A                |
| STD_1000nM            | Standard        | N/A        | N/A           | N/A      | N/A  | 1000.0000   | N/A                |
| STD_2000nM            | Standard        | N/A        | N/A           | N/A      | N/A  | 2000.0000   | N/A                |
| V1.0_MW_RQC1_20211018 | Quality Control | 1.40e4     | N/A           | 1.99     | 18.6 | 0.0000      | 5.442459e0         |
| Blank                 | Unknown         | N/A        | N/A           | N/A      | N/A  | N/A         | N/A                |
| V1.0_MWMS_20211021_1  | Unknown         | 5.83e5     | N/A           | 2.00     | 61.8 | N/A         | 2.359297e2         |
| MWXS212101D3_R1       | Quality Control | 5.96e5     | N/A           | 1.99     | 62.4 | 0.0000      | 2.410853e2         |
| MWXS212101D3_R2       | Quality Control | 5.90e5     | N/A           | 2.00     | 61.8 | 0.0000      | 2.386751e2         |
| MWXS212101D3_R3       | Quality Control | 5.83e5     | N/A           | 2.00     | 62.9 | 0.0000      | 2.358256e2         |
| A21233250b_b          | Unknown         | 2.61e4     | N/A           | 1.99     | 35.3 | N/A         | 1.031279e1         |
| A21233251b_b          | Unknown         | 5.13e4     | N/A           | 2.00     | 55.0 | N/A         | 2.055935e1         |
| A21233252b_b          | Unknown         | 1.28e4     | N/A           | 1.99     | 22.2 | N/A         | 4.946128e0         |
| A21233253b_b          | Unknown         | 2.97e4     | N/A           | 2.00     | 29.0 | N/A         | 1.180743e1         |
| A21233254b_b          | Unknown         | 2.19e4     | N/A           | 1.99     | 25.9 | N/A         | 8.641375e0         |
| A21233255b_b          | Unknown         | 1.02e4     | N/A           | 1.99     | 17.2 | N/A         | 3.902611e0         |
| A21233256b_b          | Unknown         | 7.44e4     | N/A           | 2.00     | 53.4 | N/A         | 2.989093e1         |
| A21233257b_b          | Unknown         | 8.25e3     | N/A           | 2.00     | 15.8 | N/A         | 3.095583e0         |
| A21233258b_b          | Unknown         | 1.24e4     | N/A           | 1.99     | 21.2 | N/A         | 4.794099e0         |
| A21233259b_b          | Unknown         | 8.69e4     | N/A           | 1.99     | 46.4 | N/A         | 3.495406e1         |
| A21233260b_b          | Unknown         | 3.14e5     | N/A           | 1.99     | 90.1 | N/A         | 1.270691e2         |
| A21233261b_b          | Unknown         | 3.96e5     | N/A           | 2.00     | 71.4 | N/A         | 1.601714e2         |
| A21233262b_b          | Unknown         | 7.34e3     | N/A           | 1.99     | 10.3 | N/A         | 2.727290e0         |
| A21233263b_b          | Unknown         | 2.87e4     | N/A           | 1.99     | 24.5 | N/A         | 1.138773e1         |
| A21233264b_b          | Unknown         | 4.51e4     | N/A           | 1.99     | 37.6 | N/A         | 1.802859e1         |
| A21233265b_b          | Unknown         | 9.09e3     | N/A           | 1.99     | 16.0 | N/A         | 3.438428e0         |
| A21233266b_b          | Unknown         | 1.84e4     | N/A           | 1.99     | 24.6 | N/A         | 7.217075e0         |
| A21233267b_b          | Unknown         | 1.58e4     | N/A           | 1.99     | 20.0 | N/A         | 6.140334e0         |

Compound name: (-)-Epigallocatechin

Regression Equation:  $y = 2468.01720x + 608.10898$  ( $r = 0.99843$ ) (weighting:  $1/x$ )

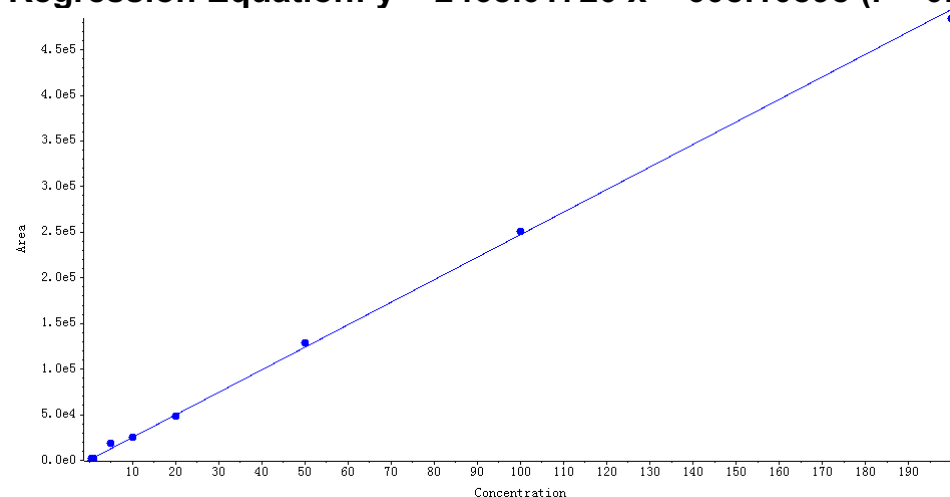

## Peak Review

### Blank

(-)-Epigallocatechin AREA:N/A  
S/N:N/A

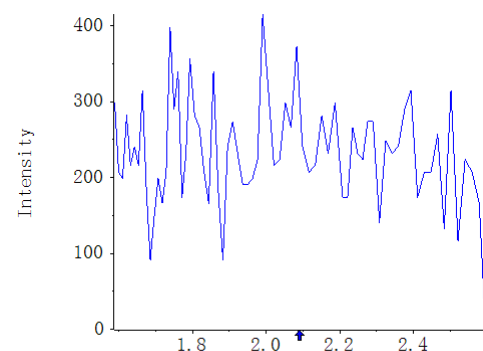

### V1.0\_MWMS\_20211021\_1

(-)-Epigallocatechin AREA:5.83e5  
S/N:61.8

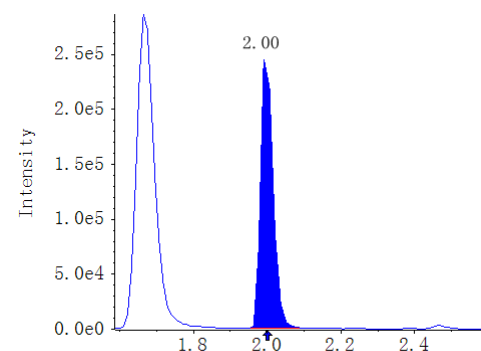

### A21233250b\_b

(-)-Epigallocatechin AREA:2.61e4  
S/N:35.3

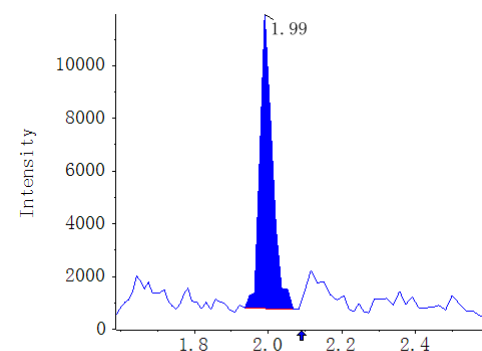

### A21233251b\_b

(-)-Epigallocatechin AREA:5.13e4  
S/N:55.0

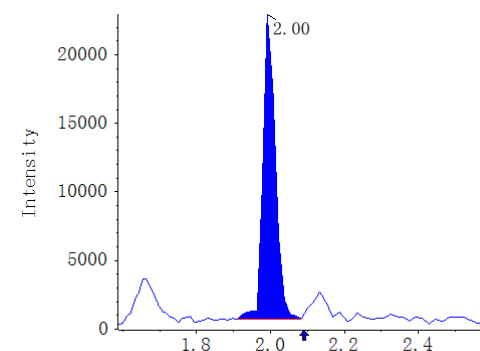

### A21233252b\_b

(-)-Epigallocatechin AREA:1.28e4  
S/N:22.2

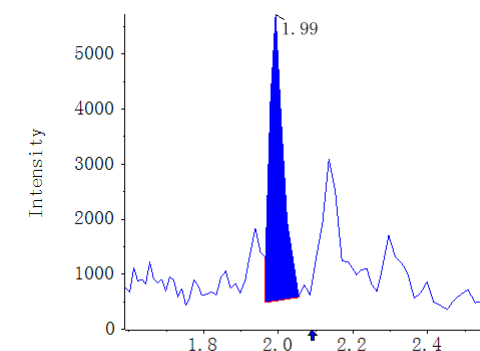

### A21233253b\_b

(-)-Epigallocatechin AREA:2.97e4  
S/N:29.0

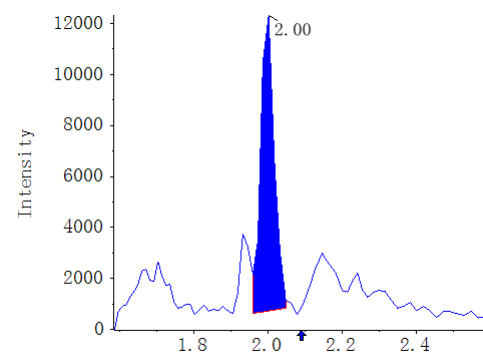

### A21233254b\_b

(-)-Epigallocatechin AREA:2.19e4  
S/N:25.9

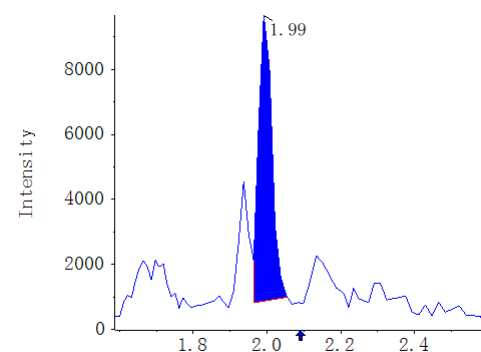

### A21233255b\_b

(-)-Epigallocatechin AREA:1.02e4  
S/N:17.2

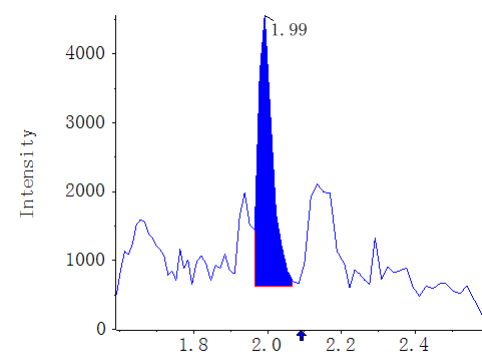

### A21233256b\_b

(-)-Epigallocatechin AREA:7.44e4  
S/N:53.4

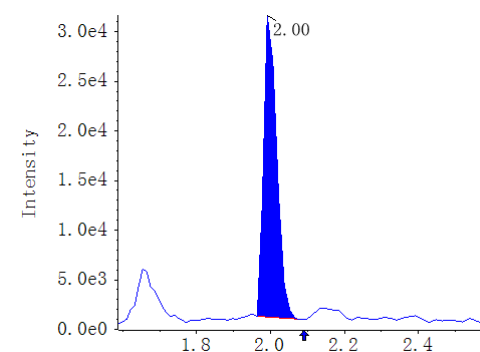

### A21233257b\_b

(-)-Epigallocatechin AREA:8.25e3  
S/N:15.8

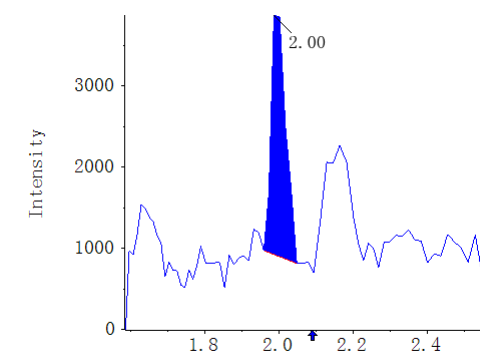

**A21233258b\_b**  
(-)-Epigallocatechin AREA:1.24e4  
S/N:21.2

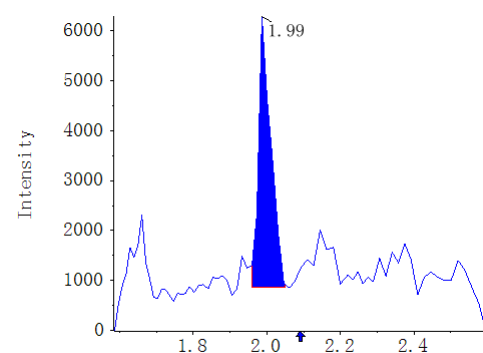

**A21233259b\_b**  
(-)-Epigallocatechin AREA:8.69e4  
S/N:46.4

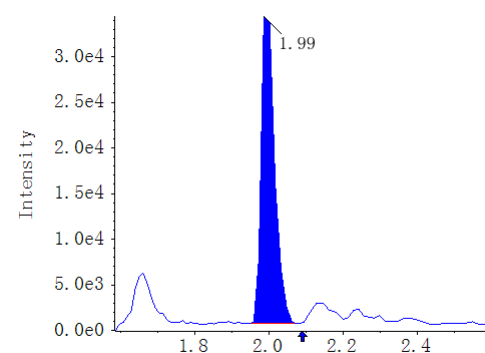

**A21233260b\_b**  
(-)-Epigallocatechin AREA:3.14e5  
S/N:90.1

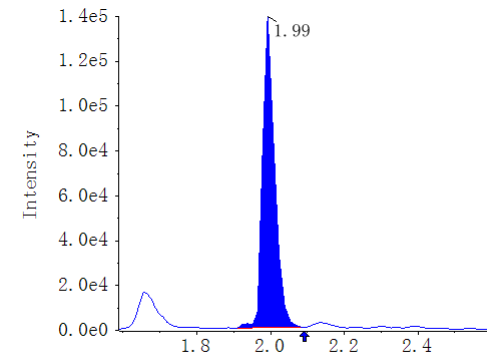

**A21233261b\_b**  
(-)-Epigallocatechin AREA:3.96e5  
S/N:71.4

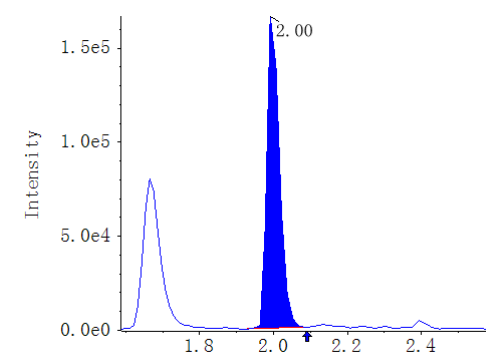

**A21233262b\_b**  
(-)-Epigallocatechin AREA:7.34e3  
S/N:10.3

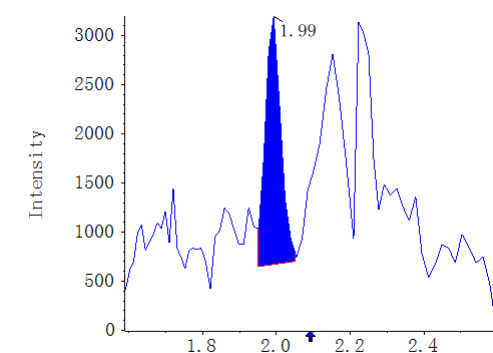

**A21233263b\_b**  
(-)-Epigallocatechin AREA:2.87e4  
S/N:24.5

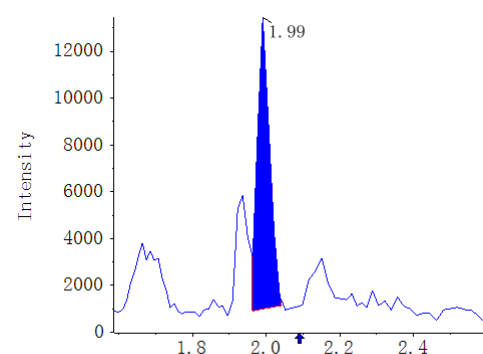

**A21233264b\_b**  
(-)-Epigallocatechin AREA:4.51e4  
S/N:37.6

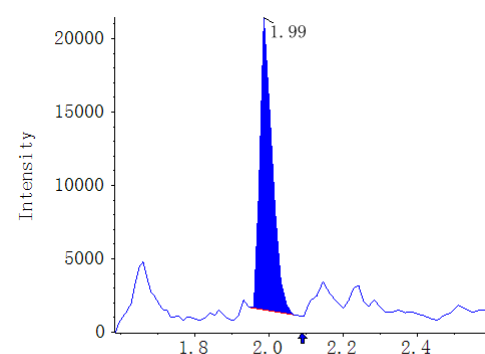

**A21233265b\_b**  
(-)-Epigallocatechin AREA:9.09e3  
S/N:16.0

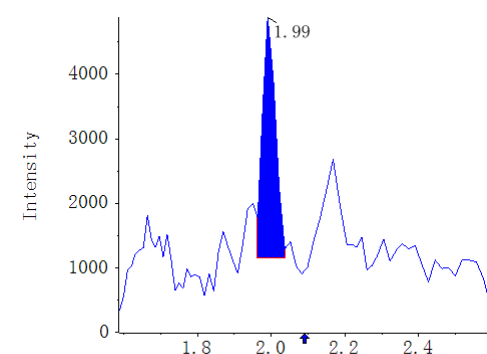

**A21233266b\_b**  
(-)-Epigallocatechin AREA:1.84e4  
S/N:24.6

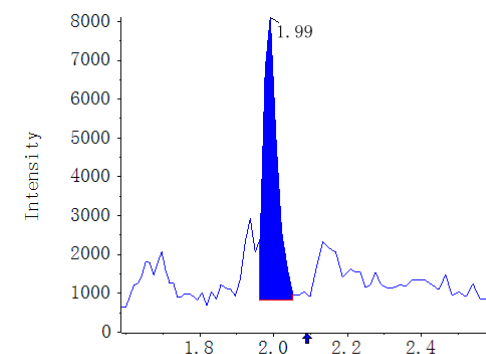

**A21233267b\_b**  
(-)-Epigallocatechin AREA:1.58e4  
S/N:20.0

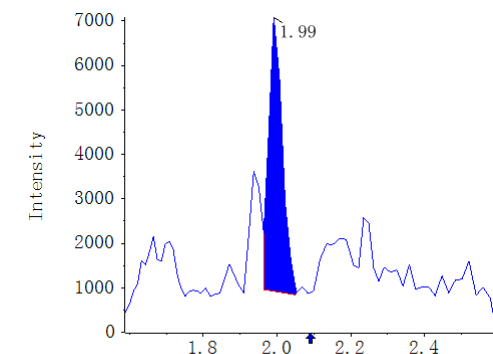

|                    |                                                    |                 |                      |
|--------------------|----------------------------------------------------|-----------------|----------------------|
| Result Table       | MWXS-21-2101D-3_18_WH6500-5_A20-3_V1.0_TY_20211028 | Algorithm Used  | MQ4                  |
| Acquisition Method | Flavonoids_V1.0_WH6500-5_LT_20211025.dam           | Instrument Name | QTRAP 6500+ Low Mass |
| Project            | N/A                                                | Analytes QTY    | 204:6                |

**Compound name: Hydroxysafflor yellow A (611.2 / 491.1)**

| Sample Name           | Sample Type     | Area (cps) | Is Area (cps) | RT (min) | S/N   | Target Conc | Calculated Conc.() |
|-----------------------|-----------------|------------|---------------|----------|-------|-------------|--------------------|
| STD_0.5nM             | Standard        | 4.79e2     | N/A           | 2.03     | 13.9  | 0.5000      | 4.798493e-1        |
| STD_1nM               | Standard        | 6.38e2     | N/A           | 2.02     | 21.9  | 1.0000      | 7.575171e-1        |
| STD_5nM               | Standard        | 4.40e3     | N/A           | 2.02     | 90.1  | 5.0000      | 7.336975e0         |
| STD_10nM              | Standard        | 5.97e3     | N/A           | 2.02     | 117.6 | 10.0000     | 1.007835e1         |
| STD_20nM              | Standard        | 9.94e3     | N/A           | 2.02     | 117.9 | 20.0000     | 1.702306e1         |
| STD_50nM              | Standard        | 2.75e4     | N/A           | 2.03     | 222.9 | 50.0000     | 4.774500e1         |
| STD_100nM             | Standard        | 5.58e4     | N/A           | 2.03     | 214.4 | 100.0000    | 9.722099e1         |
| STD_200nM             | Standard        | 1.18e5     | N/A           | 2.02     | 284.9 | 200.0000    | 2.058583e2         |
| STD_500nM             | Standard        | N/A        | N/A           | N/A      | N/A   | 500.0000    | N/A                |
| STD_1000nM            | Standard        | N/A        | N/A           | N/A      | N/A   | 1000.0000   | N/A                |
| STD_2000nM            | Standard        | N/A        | N/A           | N/A      | N/A   | 2000.0000   | N/A                |
| V1.0_MW_RQC1_20211018 | Quality Control | 1.14e5     | N/A           | 2.08     | 3.4   | 0.0000      | 1.998614e2         |
| Blank                 | Unknown         | N/A        | N/A           | N/A      | N/A   | N/A         | N/A                |
| V1.0_MWMS_20211021_1  | Unknown         | 9.66e4     | N/A           | 2.02     | 294.1 | N/A         | 1.685403e2         |
| MWXS212101D3_R1       | Quality Control | 9.87e4     | N/A           | 2.02     | 325.1 | 0.0000      | 1.723262e2         |
| MWXS212101D3_R2       | Quality Control | 9.77e4     | N/A           | 2.02     | 269.7 | 0.0000      | 1.704766e2         |
| MWXS212101D3_R3       | Quality Control | 9.93e4     | N/A           | 2.02     | 273.4 | 0.0000      | 1.734046e2         |
| A21233250b_b          | Unknown         | 5.86e3     | N/A           | 2.02     | 9.4   | N/A         | 9.895778e0         |
| A21233251b_b          | Unknown         | 2.81e3     | N/A           | 2.02     | 4.6   | N/A         | 4.549680e0         |
| A21233252b_b          | Unknown         | 1.05e3     | N/A           | 2.02     | 3.3   | N/A         | 1.485191e0         |
| A21233253b_b          | Unknown         | 1.04e4     | N/A           | 2.02     | 9.4   | N/A         | 1.781497e1         |
| A21233254b_b          | Unknown         | 4.12e3     | N/A           | 2.01     | 7.6   | N/A         | 6.842628e0         |
| A21233255b_b          | Unknown         | 5.37e3     | N/A           | 2.02     | 6.1   | N/A         | 9.035869e0         |
| A21233256b_b          | Unknown         | 4.04e3     | N/A           | 2.02     | 5.6   | N/A         | 6.701250e0         |
| A21233257b_b          | Unknown         | 5.24e3     | N/A           | 2.02     | 5.1   | N/A         | 8.806652e0         |
| A21233258b_b          | Unknown         | 2.75e3     | N/A           | 2.02     | 3.3   | N/A         | 4.460371e0         |
| A21233259b_b          | Unknown         | 1.47e3     | N/A           | 2.02     | 2.9   | N/A         | 2.210269e0         |
| A21233260b_b          | Unknown         | 3.83e3     | N/A           | 2.02     | 3.7   | N/A         | 6.344096e0         |
| A21233261b_b          | Unknown         | 4.36e3     | N/A           | 2.02     | 4.2   | N/A         | 7.266189e0         |
| A21233262b_b          | Unknown         | 8.68e3     | N/A           | 2.02     | 10.7  | N/A         | 1.483020e1         |
| A21233263b_b          | Unknown         | 7.91e3     | N/A           | 2.01     | 7.0   | N/A         | 1.347285e1         |
| A21233264b_b          | Unknown         | 7.51e3     | N/A           | 2.02     | 6.0   | N/A         | 1.278077e1         |
| A21233265b_b          | Unknown         | 1.25e4     | N/A           | 2.02     | 6.1   | N/A         | 2.153167e1         |
| A21233266b_b          | Unknown         | 7.22e3     | N/A           | 2.01     | 3.8   | N/A         | 1.227636e1         |
| A21233267b_b          | Unknown         | 4.85e3     | N/A           | 2.02     | 3.8   | N/A         | 8.129419e0         |

Compound name: Hydroxysafflor yellow A  
Regression Equation:  $y = 571.68658x + 204.97312$  ( $r = 0.99736$ ) (weighting:  $1/x$ )

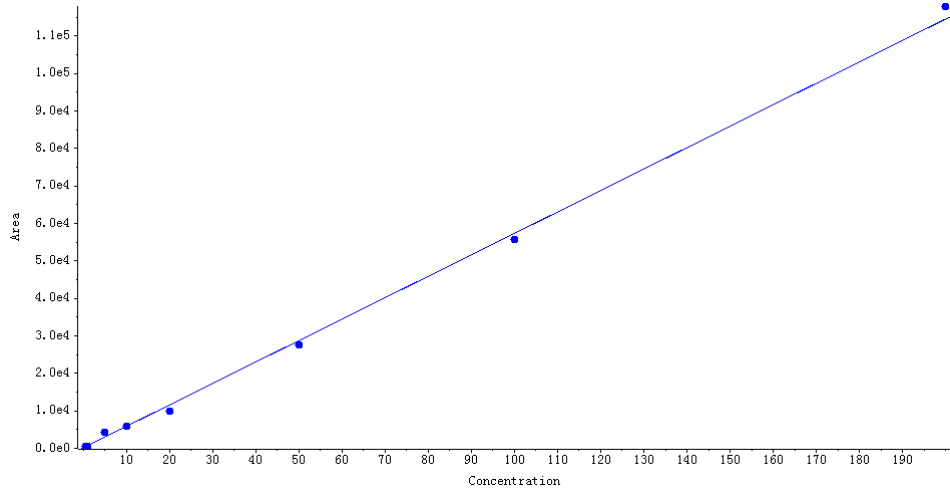

Peak Review

Blank  
Hydroxysafflor yellow A AREA:N/A  
S/N:N/A

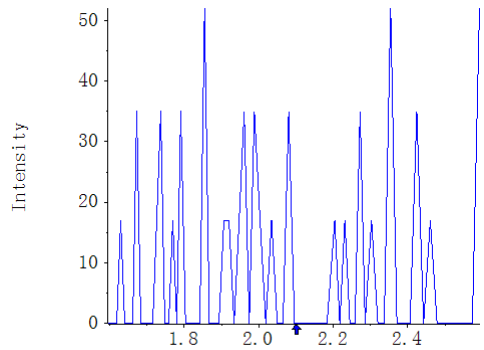

V1.0\_MWMS\_20211021\_1  
Hydroxysafflor yellow A AREA:9.66e4  
S/N:294.1

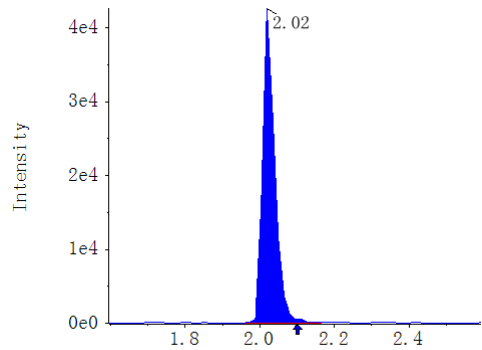

A21233250b\_b  
Hydroxysafflor yellow A AREA:5.86e3  
S/N:9.4

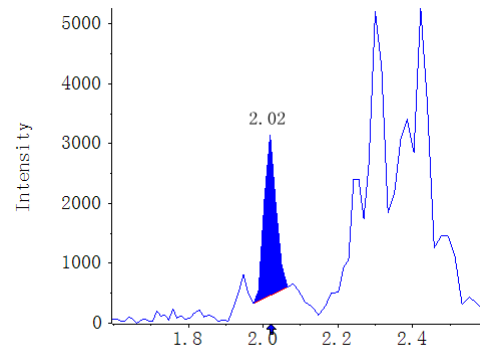

A21233251b\_b  
Hydroxysafflor yellow A AREA:2.81e3  
S/N:4.6

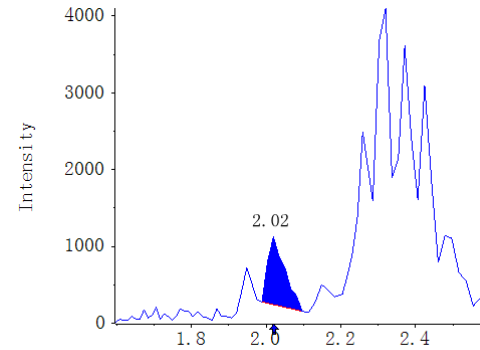

A21233252b\_b  
Hydroxysafflor yellow A AREA:1.05e3  
S/N:3.3

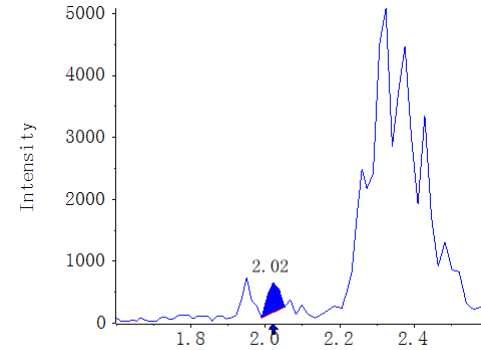

A21233253b\_b  
Hydroxysafflor yellow A AREA:1.04e4  
S/N:9.4

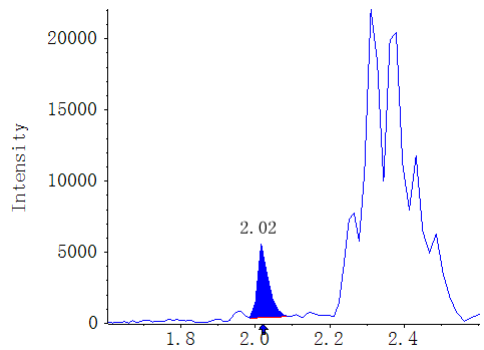

A21233254b\_b  
Hydroxysafflor yellow A AREA:4.12e3  
S/N:7.6

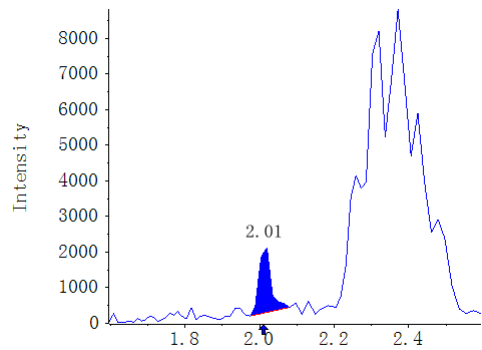

A21233255b\_b  
Hydroxysafflor yellow A AREA:5.37e3  
S/N:6.1

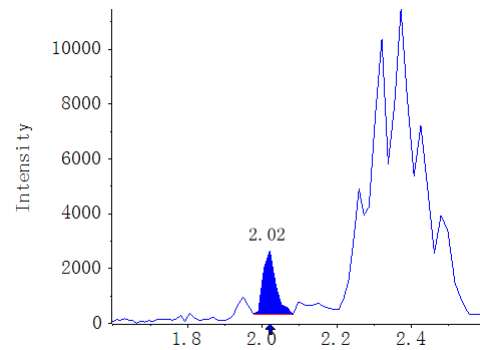

A21233256b\_b  
Hydroxysafflor yellow A AREA:4.04e3  
S/N:5.6

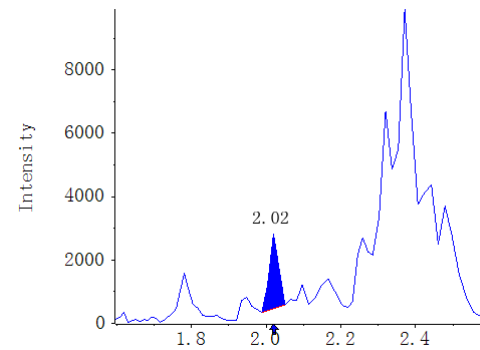

A21233257b\_b  
Hydroxysafflor yellow A AREA:5.24e3  
S/N:5.1

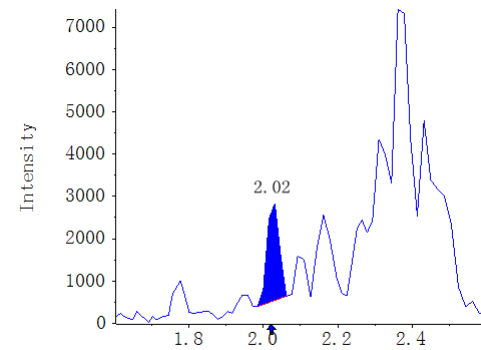

**A21233258b\_b**  
Hydroxysafflor yellow A  
AREA:2.75e3 S/N:3.3

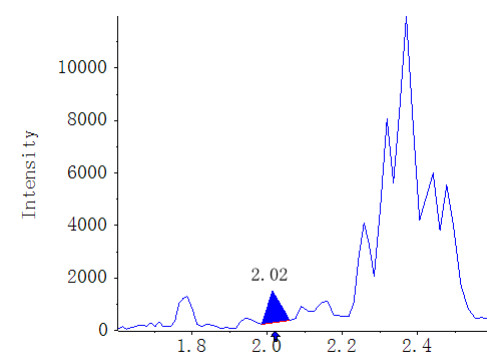

**A21233259b\_b**  
Hydroxysafflor yellow A  
AREA:1.47e3 S/N:2.9

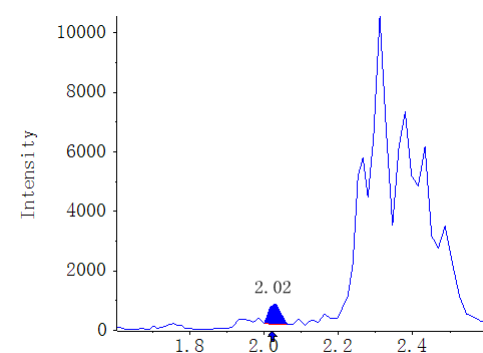

**A21233260b\_b**  
Hydroxysafflor yellow A  
AREA:3.83e3 S/N:3.7

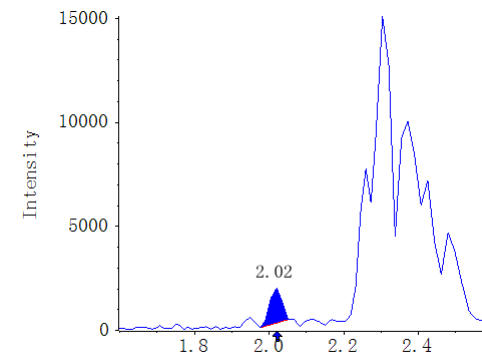

**A21233261b\_b**  
Hydroxysafflor yellow A  
AREA:4.36e3 S/N:4.2

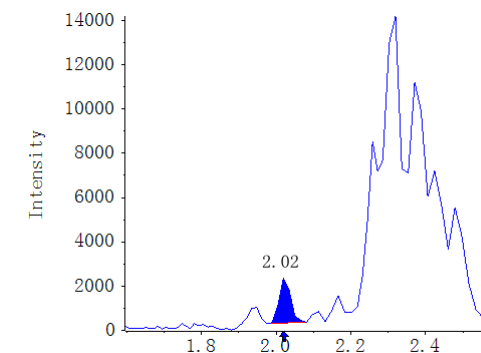

**A21233262b\_b**  
Hydroxysafflor yellow A  
AREA:8.68e3 S/N:10.7

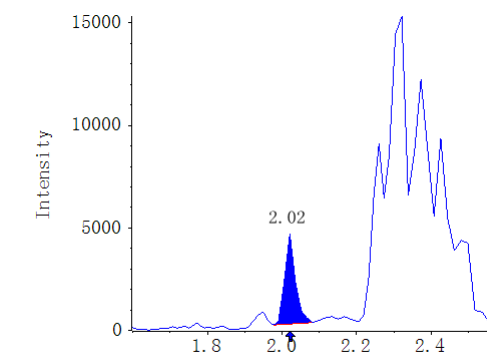

**A21233263b\_b**  
Hydroxysafflor yellow A  
AREA:7.91e3 S/N:7.0

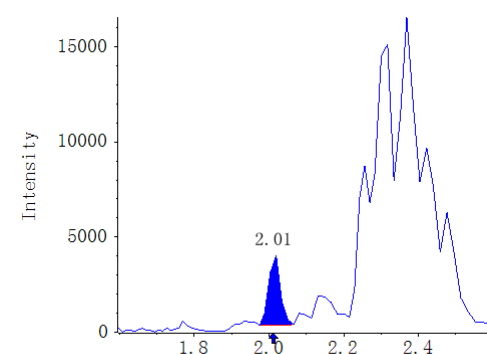

**A21233264b\_b**  
Hydroxysafflor yellow A  
AREA:7.51e3 S/N:6.0

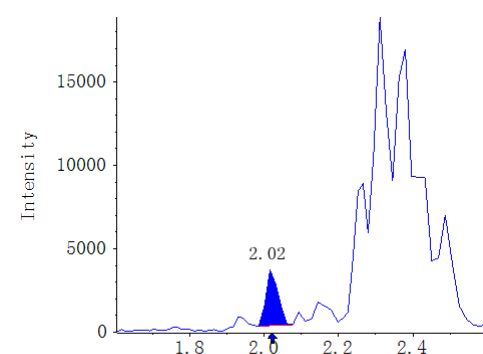

**A21233265b\_b**  
Hydroxysafflor yellow A  
AREA:1.25e4 S/N:6.1

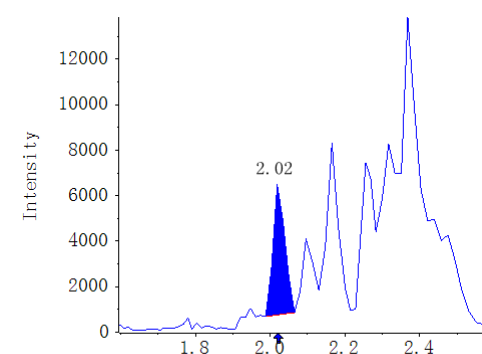

**A21233266b\_b**  
Hydroxysafflor yellow A  
AREA:7.22e3 S/N:3.8

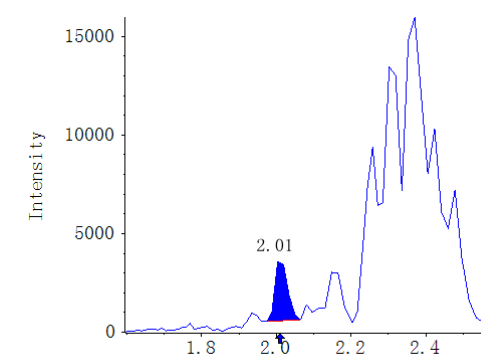

**A21233267b\_b**  
Hydroxysafflor yellow A  
AREA:4.85e3 S/N:3.8

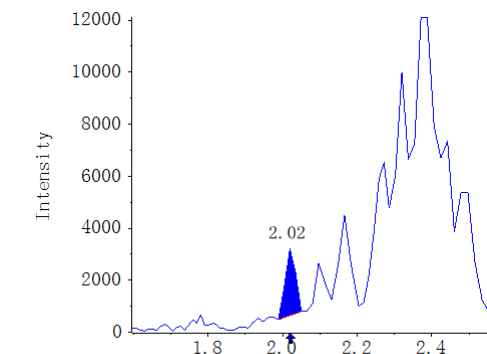

|                    |                                                    |                 |                      |
|--------------------|----------------------------------------------------|-----------------|----------------------|
| Result Table       | MWXS-21-2101D-3_18_WH6500-5_A20-3_V1.0_TY_20211028 | Algorithm Used  | MQ4                  |
| Acquisition Method | Flavonoids_V1.0_WH6500-5_LT_20211025.dam           | Instrument Name | QTRAP 6500+ Low Mass |
| Project            | N/A                                                | Analytes QTY    | 204:20               |

**Compound name: Isoliquiritigenin (255.1 / 119.1)**

| Sample Name           | Sample Type     | Area (cps) | Is Area (cps) | RT (min) | S/N   | Target Conc | Calculated Conc.() |
|-----------------------|-----------------|------------|---------------|----------|-------|-------------|--------------------|
| STD_0.5nM             | Standard        | 1.72e4     | N/A           | 5.58     | 30.0  | 0.5000      | 3.341491e-1        |
| STD_1nM               | Standard        | 3.35e4     | N/A           | 5.57     | 50.0  | 1.0000      | 8.348696e-1        |
| STD_5nM               | Standard        | 2.34e5     | N/A           | 5.57     | 179.1 | 5.0000      | 7.005695e0         |
| STD_10nM              | Standard        | 3.44e5     | N/A           | 5.57     | 182.6 | 10.0000     | 1.036083e1         |
| STD_20nM              | Standard        | 6.62e5     | N/A           | 5.57     | 259.0 | 20.0000     | 2.013858e1         |
| STD_50nM              | Standard        | 1.76e6     | N/A           | 5.58     | 236.5 | 50.0000     | 5.397148e1         |
| STD_100nM             | Standard        | 3.29e6     | N/A           | 5.58     | 240.1 | 100.0000    | 1.007959e2         |
| STD_200nM             | Standard        | 6.29e6     | N/A           | 5.57     | 235.0 | 200.0000    | 1.930585e2         |
| STD_500nM             | Standard        | N/A        | N/A           | N/A      | N/A   | 500.0000    | N/A                |
| STD_1000nM            | Standard        | N/A        | N/A           | N/A      | N/A   | 1000.0000   | N/A                |
| STD_2000nM            | Standard        | N/A        | N/A           | N/A      | N/A   | 2000.0000   | N/A                |
| V1.0_MW_RQC1_20211018 | Quality Control | N/A        | N/A           | N/A      | N/A   | 0.0000      | N/A                |
| Blank                 | Unknown         | N/A        | N/A           | N/A      | N/A   | N/A         | N/A                |
| V1.0_MWMS_20211021_1  | Unknown         | 4.68e6     | N/A           | 5.59     | 246.1 | N/A         | 1.435313e2         |
| MWXS212101D3_R1       | Quality Control | 4.92e6     | N/A           | 5.58     | 271.8 | 0.0000      | 1.508561e2         |
| MWXS212101D3_R2       | Quality Control | 4.80e6     | N/A           | 5.58     | 247.0 | 0.0000      | 1.473081e2         |
| MWXS212101D3_R3       | Quality Control | 4.70e6     | N/A           | 5.58     | 256.8 | 0.0000      | 1.442793e2         |
| A21233250b_b          | Unknown         | N/A        | N/A           | N/A      | N/A   | N/A         | N/A                |
| A21233251b_b          | Unknown         | N/A        | N/A           | N/A      | N/A   | N/A         | N/A                |
| A21233252b_b          | Unknown         | N/A        | N/A           | N/A      | N/A   | N/A         | N/A                |
| A21233253b_b          | Unknown         | 2.36e4     | N/A           | 5.59     | 44.5  | N/A         | 5.312470e-1        |
| A21233254b_b          | Unknown         | 4.12e4     | N/A           | 5.58     | 70.1  | N/A         | 1.070064e0         |
| A21233255b_b          | Unknown         | 2.91e4     | N/A           | 5.58     | 61.0  | N/A         | 6.981687e-1        |
| A21233256b_b          | Unknown         | 9.04e3     | N/A           | 5.58     | 28.7  | N/A         | 8.341050e-2        |
| A21233257b_b          | Unknown         | 9.59e3     | N/A           | 5.59     | 23.4  | N/A         | 1.003203e-1        |
| A21233258b_b          | Unknown         | 1.15e4     | N/A           | 5.58     | 31.1  | N/A         | 1.584105e-1        |
| A21233259b_b          | Unknown         | N/A        | N/A           | N/A      | N/A   | N/A         | N/A                |
| A21233260b_b          | Unknown         | N/A        | N/A           | N/A      | N/A   | N/A         | N/A                |
| A21233261b_b          | Unknown         | N/A        | N/A           | N/A      | N/A   | N/A         | N/A                |
| A21233262b_b          | Unknown         | N/A        | N/A           | N/A      | N/A   | N/A         | N/A                |
| A21233263b_b          | Unknown         | 3.56e4     | N/A           | 5.58     | 77.9  | N/A         | 8.988195e-1        |
| A21233264b_b          | Unknown         | 6.33e4     | N/A           | 5.59     | 97.0  | N/A         | 1.750796e0         |
| A21233265b_b          | Unknown         | 2.15e4     | N/A           | 5.58     | 44.8  | N/A         | 4.667258e-1        |
| A21233266b_b          | Unknown         | 2.91e4     | N/A           | 5.58     | 59.3  | N/A         | 7.005021e-1        |
| A21233267b_b          | Unknown         | 1.80e4     | N/A           | 5.59     | 46.3  | N/A         | 3.589496e-1        |

Compound name: Isoliquiritigenin

Regression Equation:  $y = 3.25665e4 x + 6324.48386$  ( $r = 0.99802$ ) (weighting:  $1 / x$ )

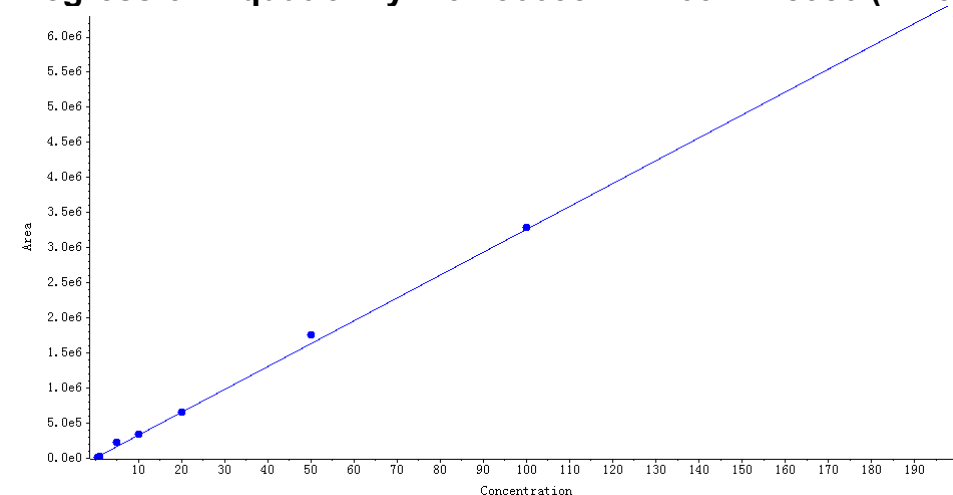

### Peak Review

#### Blank

Isoliquiritigenin AREA:N/A  
S/N:N/A

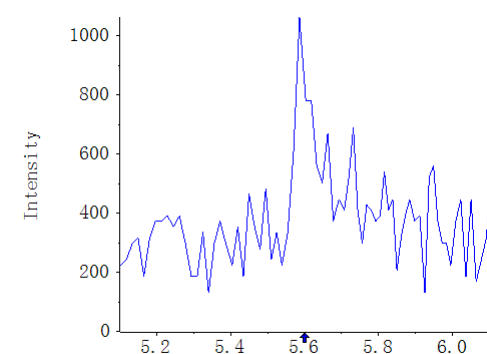

#### V1.0\_MWMS\_20211021\_1

Isoliquiritigenin AREA:4.68e6  
S/N:246.1

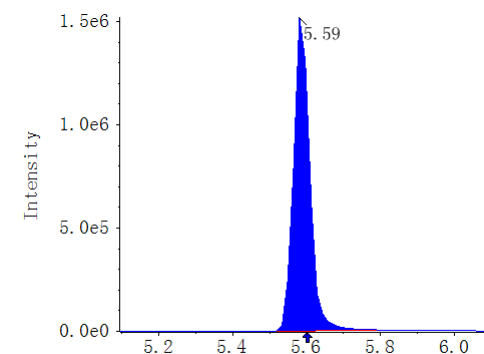

#### A21233250b\_b

Isoliquiritigenin AREA:N/A  
S/N:N/A

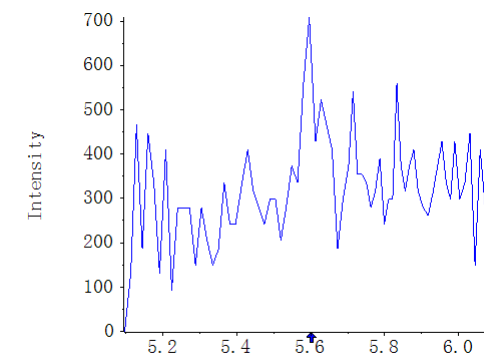

#### A21233251b\_b

Isoliquiritigenin AREA:N/A  
S/N:N/A

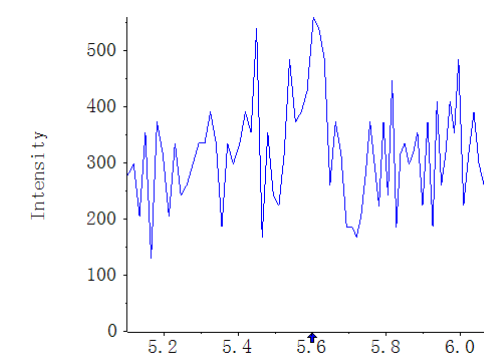

#### A21233252b\_b

Isoliquiritigenin AREA:N/A  
S/N:N/A

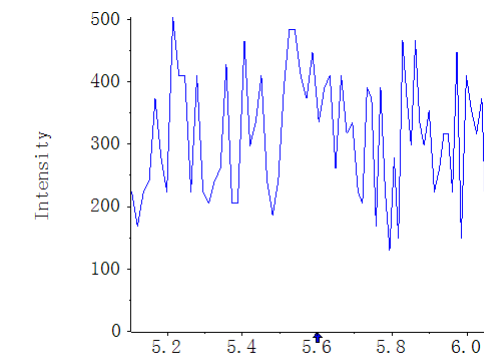

#### A21233253b\_b

Isoliquiritigenin AREA:2.36e4  
S/N:44.5

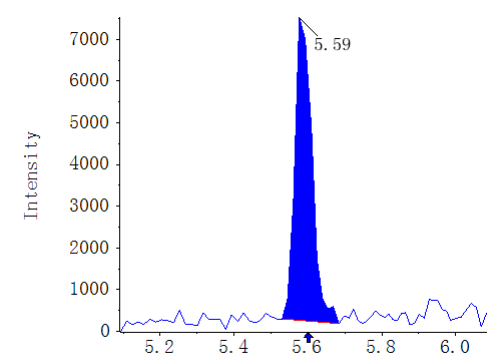

#### A21233254b\_b

Isoliquiritigenin AREA:4.12e4  
S/N:70.1

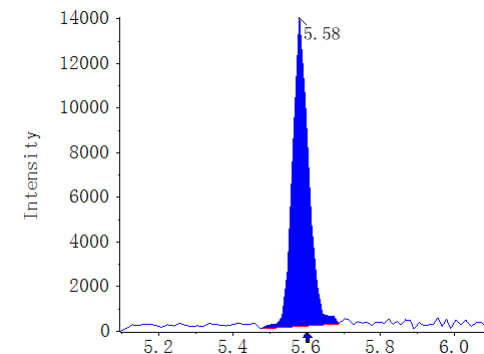

#### A21233255b\_b

Isoliquiritigenin AREA:2.91e4  
S/N:61.0

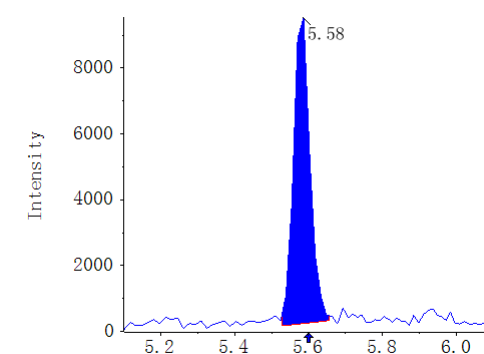

#### A21233256b\_b

Isoliquiritigenin AREA:9.04e3  
S/N:28.7

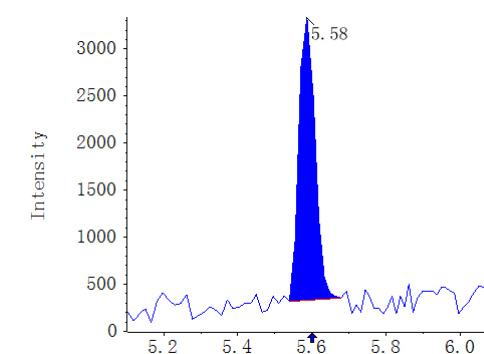

#### A21233257b\_b

Isoliquiritigenin AREA:9.59e3  
S/N:23.4

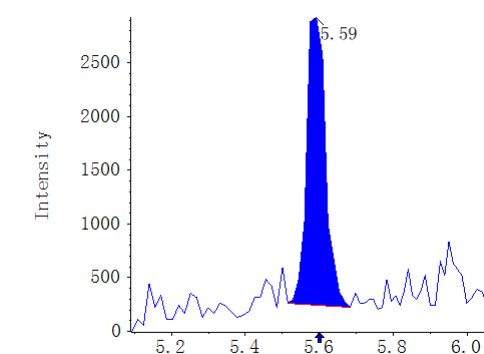

**A21233258b\_b**

Isoliquiritigenin AREA:1.15e4  
S/N:31.1

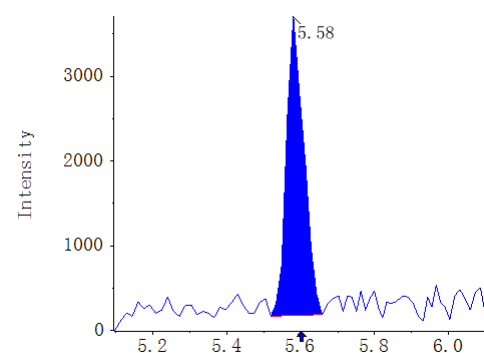

**A21233259b\_b**

Isoliquiritigenin AREA:N/A  
S/N:N/A

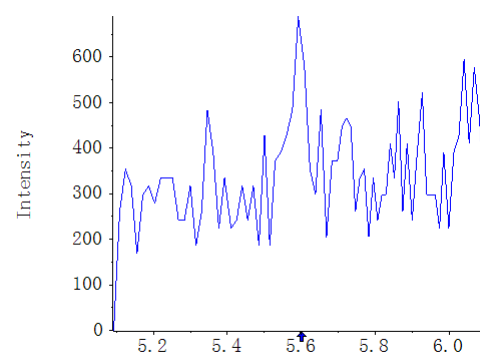

**A21233260b\_b**

Isoliquiritigenin AREA:N/A  
S/N:N/A

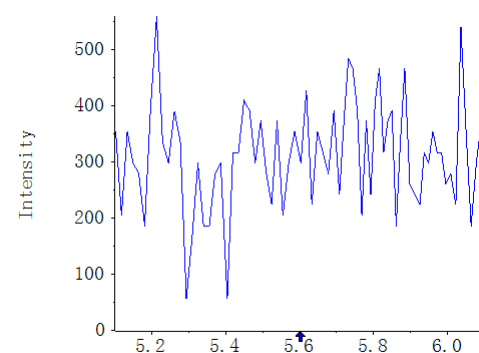

**A21233261b\_b**

Isoliquiritigenin AREA:N/A  
S/N:N/A

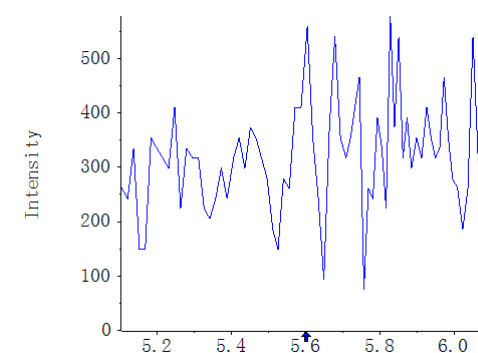

**A21233262b\_b**

Isoliquiritigenin AREA:N/A  
S/N:N/A

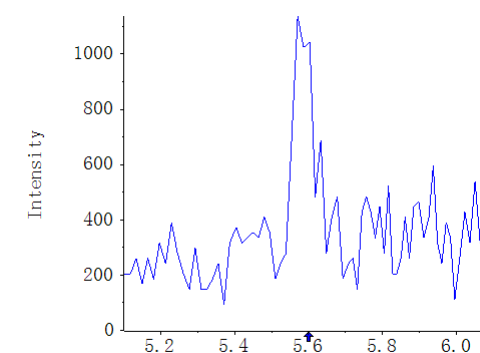

**A21233263b\_b**

Isoliquiritigenin AREA:3.56e4  
S/N:77.9

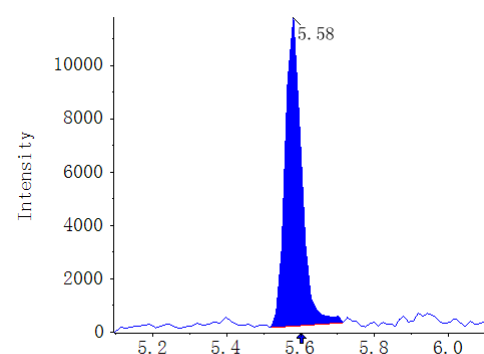

**A21233264b\_b**

Isoliquiritigenin AREA:6.33e4  
S/N:97.0

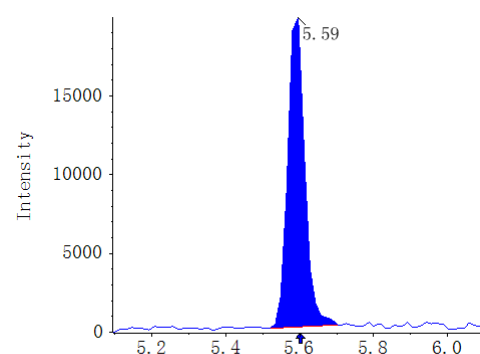

**A21233265b\_b**

Isoliquiritigenin AREA:2.15e4  
S/N:44.8

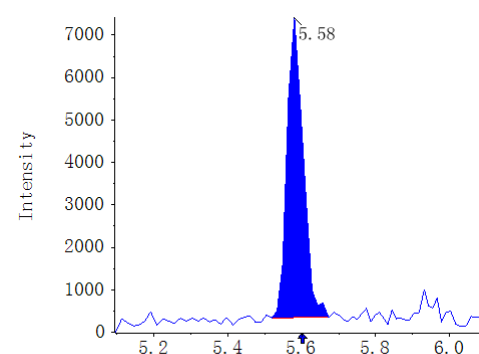

**A21233266b\_b**

Isoliquiritigenin AREA:2.91e4  
S/N:59.3

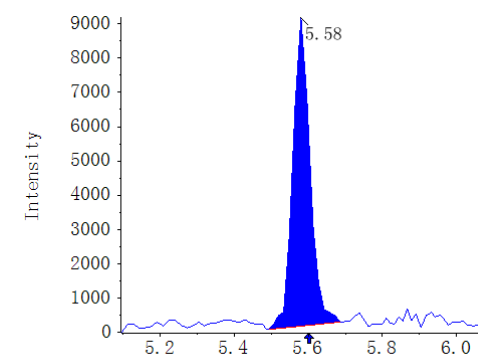

**A21233267b\_b**

Isoliquiritigenin AREA:1.80e4  
S/N:46.3

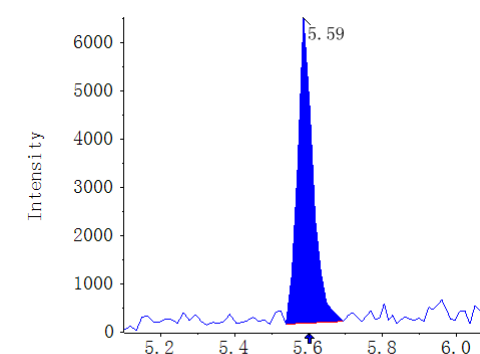

|                    |                                                    |                 |                      |
|--------------------|----------------------------------------------------|-----------------|----------------------|
| Result Table       | MWXS-21-2101D-3_18_WH6500-5_A20-3_V1.0_TY_20211028 | Algorithm Used  | MQ4                  |
| Acquisition Method | Flavonoids_V1.0_WH6500-5_LT_20211025.dam           | Instrument Name | QTRAP 6500+ Low Mass |
| Project            | N/A                                                | Analytes QTY    | 204:43               |

**Compound name: (-)-Catechin (289.1 / 123.0)**

| Sample Name           | Sample Type     | Area (cps) | Is Area (cps) | RT (min) | S/N  | Target Conc | Calculated Conc.() |
|-----------------------|-----------------|------------|---------------|----------|------|-------------|--------------------|
| STD_0.5nM             | Standard        | N/A        | N/A           | N/A      | N/A  | 0.5000      | N/A                |
| STD_1nM               | Standard        | 1.24e3     | N/A           | 2.19     | 4.1  | 1.0000      | 6.110194e-1        |
| STD_5nM               | Standard        | 6.16e3     | N/A           | 2.19     | 15.2 | 5.0000      | 6.342053e0         |
| STD_10nM              | Standard        | 1.02e4     | N/A           | 2.19     | 20.9 | 10.0000     | 1.102913e1         |
| STD_20nM              | Standard        | 1.84e4     | N/A           | 2.18     | 26.2 | 20.0000     | 2.062977e1         |
| STD_50nM              | Standard        | 4.55e4     | N/A           | 2.19     | 48.5 | 50.0000     | 5.223146e1         |
| STD_100nM             | Standard        | 8.06e4     | N/A           | 2.19     | 43.4 | 100.0000    | 9.315127e1         |
| STD_200nM             | Standard        | 1.74e5     | N/A           | 2.18     | 68.8 | 200.0000    | 2.020053e2         |
| STD_500nM             | Standard        | N/A        | N/A           | N/A      | N/A  | 500.0000    | N/A                |
| STD_1000nM            | Standard        | N/A        | N/A           | N/A      | N/A  | 1000.0000   | N/A                |
| STD_2000nM            | Standard        | N/A        | N/A           | N/A      | N/A  | 2000.0000   | N/A                |
| V1.0_MW_RQC1_20211018 | Quality Control | N/A        | N/A           | N/A      | N/A  | 0.0000      | N/A                |
| Blank                 | Unknown         | N/A        | N/A           | N/A      | N/A  | N/A         | N/A                |
| V1.0_MWMS_20211021_1  | Unknown         | 1.31e5     | N/A           | 2.19     | 49.5 | N/A         | 1.521366e2         |
| MWXS212101D3_R1       | Quality Control | 1.42e5     | N/A           | 2.19     | 45.2 | 0.0000      | 1.643192e2         |
| MWXS212101D3_R2       | Quality Control | 1.39e5     | N/A           | 2.19     | 53.1 | 0.0000      | 1.614741e2         |
| MWXS212101D3_R3       | Quality Control | 1.40e5     | N/A           | 2.19     | 53.2 | 0.0000      | 1.625433e2         |
| A21233250b_b          | Unknown         | 1.30e4     | N/A           | 2.18     | 13.7 | N/A         | 1.433322e1         |
| A21233251b_b          | Unknown         | 1.04e4     | N/A           | 2.19     | 14.0 | N/A         | 1.124795e1         |
| A21233252b_b          | Unknown         | 4.95e3     | N/A           | 2.20     | 5.3  | N/A         | 4.931176e0         |
| A21233253b_b          | Unknown         | 8.79e3     | N/A           | 2.19     | 8.7  | N/A         | 9.412235e0         |
| A21233254b_b          | Unknown         | 5.98e3     | N/A           | 2.18     | 8.2  | N/A         | 6.131496e0         |
| A21233255b_b          | Unknown         | 7.77e3     | N/A           | 2.19     | 8.2  | N/A         | 8.220808e0         |
| A21233256b_b          | Unknown         | 6.30e3     | N/A           | 2.20     | 4.8  | N/A         | 6.509852e0         |
| A21233257b_b          | Unknown         | 6.19e3     | N/A           | 2.20     | 5.4  | N/A         | 6.379968e0         |
| A21233258b_b          | Unknown         | 6.29e3     | N/A           | 2.19     | 5.1  | N/A         | 6.494431e0         |
| A21233259b_b          | Unknown         | 9.94e3     | N/A           | 2.19     | 6.2  | N/A         | 1.075006e1         |
| A21233260b_b          | Unknown         | 1.33e4     | N/A           | 2.18     | 10.6 | N/A         | 1.466479e1         |
| A21233261b_b          | Unknown         | 9.55e4     | N/A           | 2.19     | 28.7 | N/A         | 1.105059e2         |
| A21233262b_b          | Unknown         | 1.47e4     | N/A           | 2.19     | 10.0 | N/A         | 1.633178e1         |
| A21233263b_b          | Unknown         | 1.55e4     | N/A           | 2.19     | 14.6 | N/A         | 1.724462e1         |
| A21233264b_b          | Unknown         | 2.65e4     | N/A           | 2.20     | 13.6 | N/A         | 3.007579e1         |
| A21233265b_b          | Unknown         | 9.21e3     | N/A           | 2.20     | 6.2  | N/A         | 9.901830e0         |
| A21233266b_b          | Unknown         | 1.45e4     | N/A           | 2.18     | 14.2 | N/A         | 1.606641e1         |
| A21233267b_b          | Unknown         | 1.90e4     | N/A           | 2.20     | 12.0 | N/A         | 2.126302e1         |

Compound name: (-)-Catechin  
Regression Equation:  $y = 858.06877 x + 714.83349$  ( $r = 0.99826$ ) (weighting:  $1 / x$ )

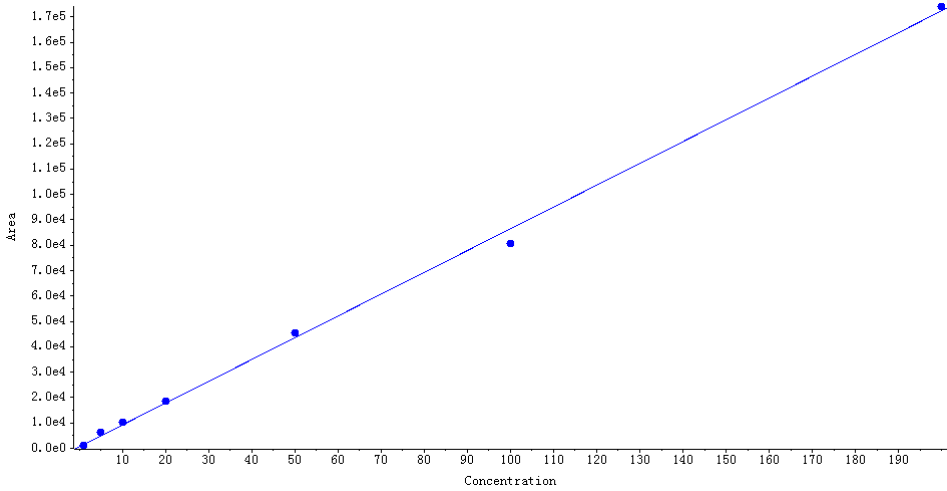

Peak Review

Blank  
(-)-Catechin AREA:N/A S/N:N/A

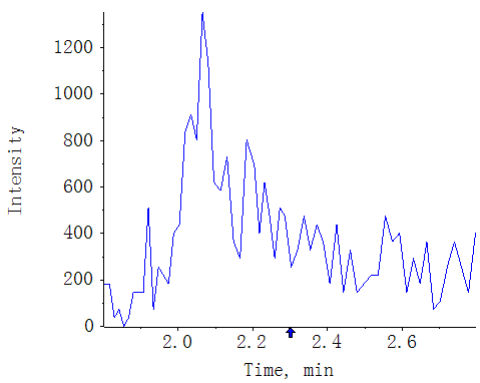

V1.0\_MWMS\_20211021\_1  
(-)-Catechin AREA:1.31e5 S/N:49.5

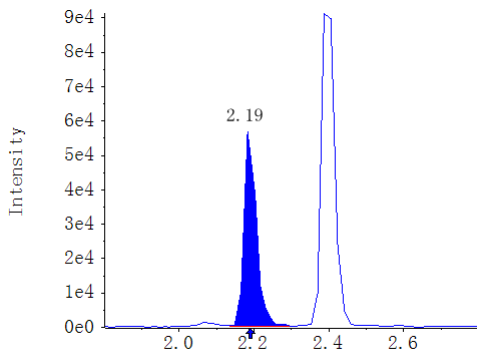

A21233250b\_b  
(-)-Catechin AREA:1.30e4 S/N:13.7

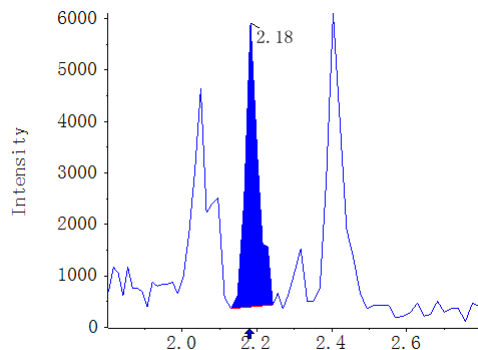

A21233251b\_b  
(-)-Catechin AREA:1.04e4 S/N:14.0

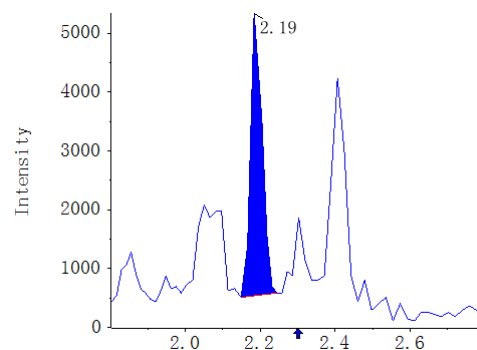

A21233252b\_b  
(-)-Catechin AREA:4.95e3 S/N:5.3

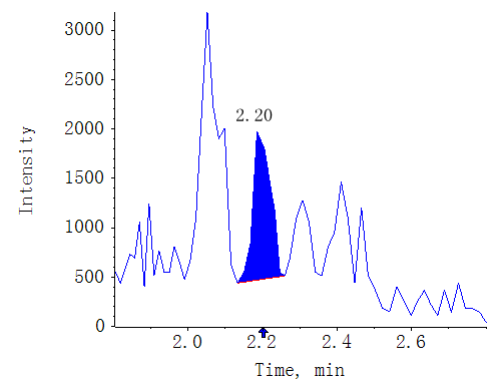

A21233253b\_b  
(-)-Catechin AREA:8.79e3 S/N:8.7

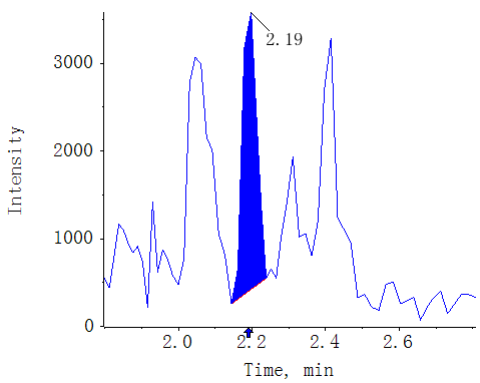

A21233254b\_b  
(-)-Catechin AREA:5.98e3 S/N:8.2

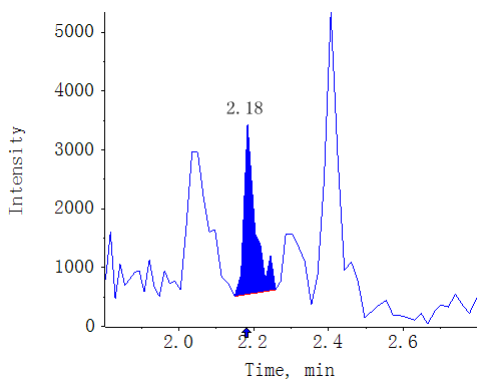

A21233255b\_b  
(-)-Catechin AREA:7.77e3 S/N:8.2

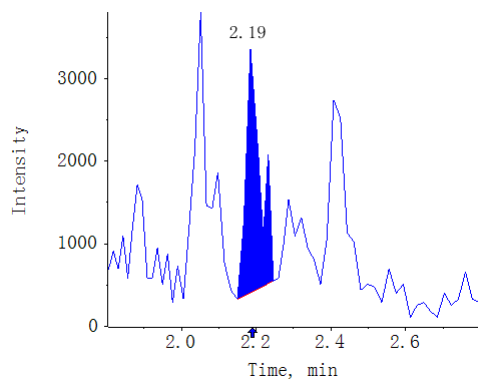

A21233256b\_b  
(-)-Catechin AREA:6.30e3 S/N:4.8

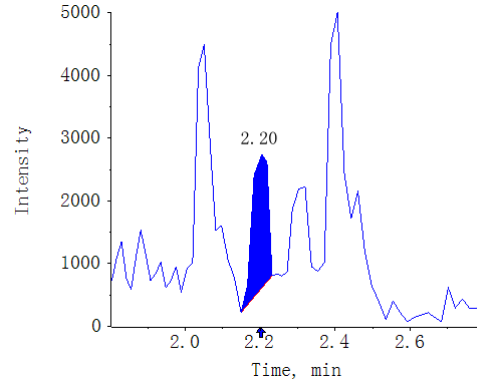

A21233257b\_b  
(-)-Catechin AREA:6.19e3 S/N:5.4

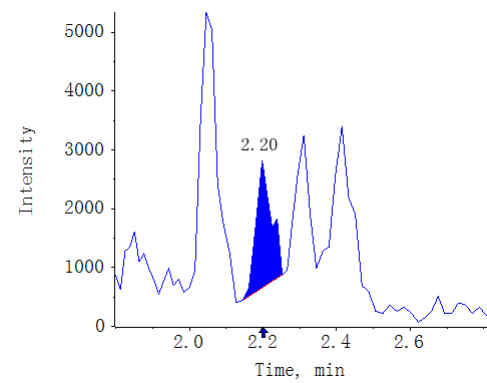

**A21233258b\_b**

(-)-Catechin AREA:6.29e3 S/N:5.1

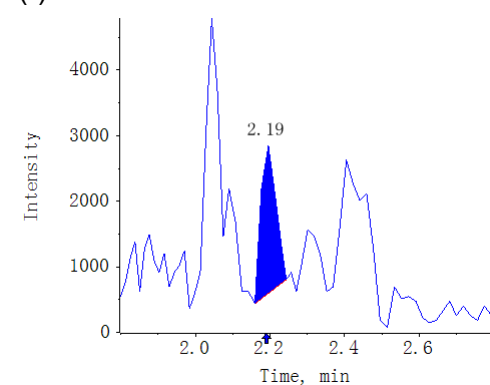

**A21233259b\_b**

(-)-Catechin AREA:9.94e3 S/N:6.2

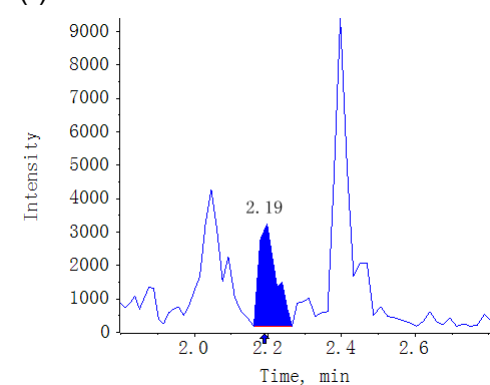

**A21233260b\_b**

(-)-Catechin AREA:1.33e4 S/N:10.6

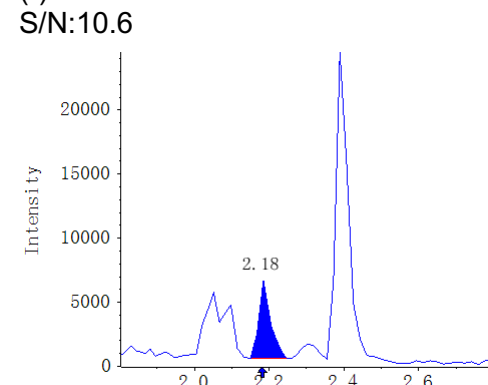

**A21233261b\_b**

(-)-Catechin AREA:9.55e4 S/N:28.7

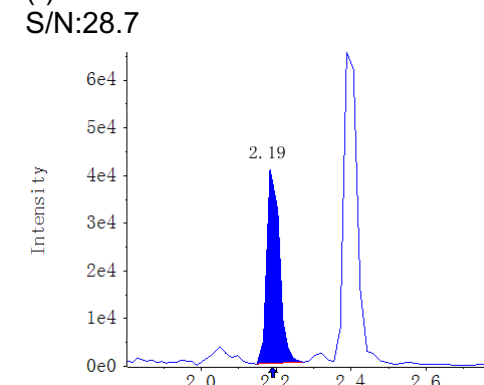

**A21233262b\_b**

(-)-Catechin AREA:1.47e4 S/N:10.0

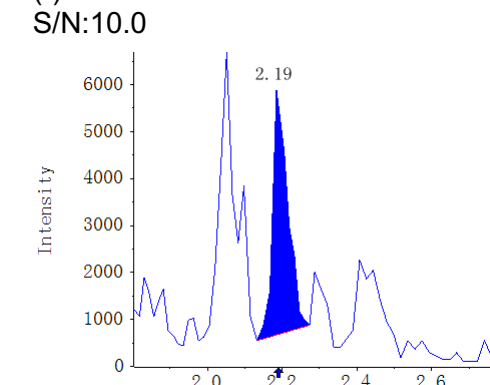

**A21233263b\_b**

(-)-Catechin AREA:1.55e4 S/N:14.6

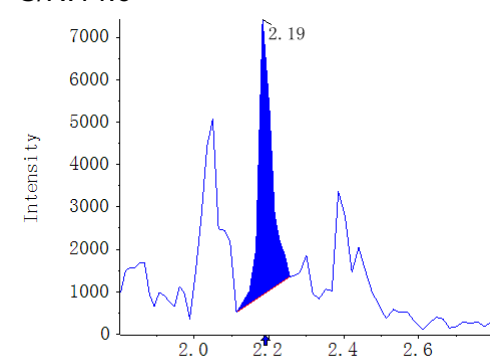

**A21233264b\_b**

(-)-Catechin AREA:2.65e4 S/N:13.6

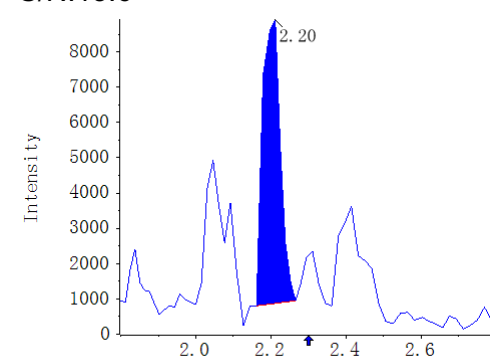

**A21233265b\_b**

(-)-Catechin AREA:9.21e3 S/N:6.2

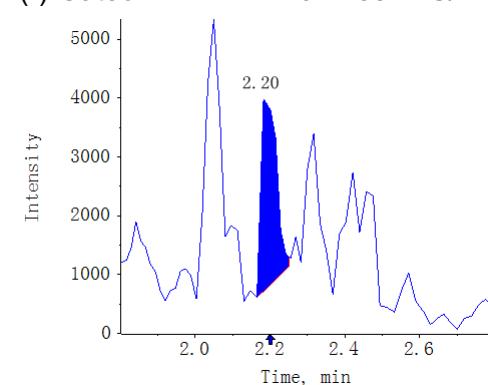

**A21233266b\_b**

(-)-Catechin AREA:1.45e4 S/N:14.2

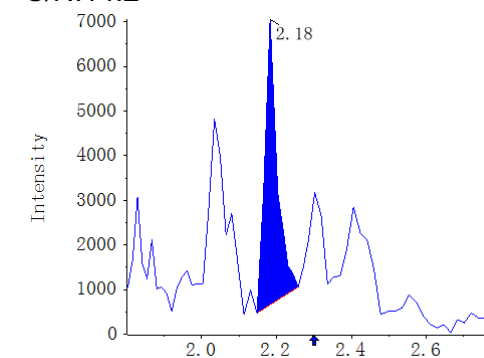

**A21233267b\_b**

(-)-Catechin AREA:1.90e4 S/N:12.0

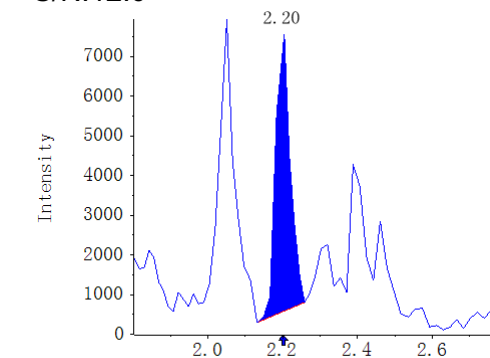

|                    |                                                    |                 |                      |
|--------------------|----------------------------------------------------|-----------------|----------------------|
| Result Table       | MWXS-21-2101D-3_18_WH6500-5_A20-3_V1.0_TY_20211028 | Algorithm Used  | MQ4                  |
| Acquisition Method | Flavonoids_V1.0_WH6500-5_LT_20211025.dam           | Instrument Name | QTRAP 6500+ Low Mass |
| Project            | N/A                                                | Analytes QTY    | 204:36               |

**Compound name: Narirutin (579.2 / 271.1)**

| Sample Name           | Sample Type     | Area (cps) | Is Area (cps) | RT (min) | S/N   | Target Conc | Calculated Conc.() |
|-----------------------|-----------------|------------|---------------|----------|-------|-------------|--------------------|
| STD_0.5nM             | Standard        | 6.24e3     | N/A           | 2.89     | 32.7  | 0.5000      | 3.996285e-1        |
| STD_1nM               | Standard        | 9.82e3     | N/A           | 2.88     | 43.5  | 1.0000      | 7.872362e-1        |
| STD_5nM               | Standard        | 6.92e4     | N/A           | 2.89     | 143.6 | 5.0000      | 7.208858e0         |
| STD_10nM              | Standard        | 9.57e4     | N/A           | 2.89     | 137.7 | 10.0000     | 1.007389e1         |
| STD_20nM              | Standard        | 1.78e5     | N/A           | 2.89     | 94.0  | 20.0000     | 1.898543e1         |
| STD_50nM              | Standard        | 4.76e5     | N/A           | 2.89     | 305.3 | 50.0000     | 5.122150e1         |
| STD_100nM             | Standard        | 9.30e5     | N/A           | 2.90     | 338.0 | 100.0000    | 1.003056e2         |
| STD_200nM             | Standard        | 1.83e6     | N/A           | 2.88     | 398.9 | 200.0000    | 1.975179e2         |
| STD_500nM             | Standard        | N/A        | N/A           | N/A      | N/A   | 500.0000    | N/A                |
| STD_1000nM            | Standard        | N/A        | N/A           | N/A      | N/A   | 1000.0000   | N/A                |
| STD_2000nM            | Standard        | N/A        | N/A           | N/A      | N/A   | 2000.0000   | N/A                |
| V1.0_MW_RQC1_20211018 | Quality Control | 2.67e4     | N/A           | 2.88     | 37.4  | 0.0000      | 2.615789e0         |
| Blank                 | Unknown         | N/A        | N/A           | N/A      | N/A   | N/A         | N/A                |
| V1.0_MWMS_20211021_1  | Unknown         | 1.57e6     | N/A           | 2.90     | 365.7 | N/A         | 1.691182e2         |
| MWXS212101D3_R1       | Quality Control | 1.60e6     | N/A           | 2.90     | 367.2 | 0.0000      | 1.724673e2         |
| MWXS212101D3_R2       | Quality Control | 1.56e6     | N/A           | 2.90     | 406.1 | 0.0000      | 1.689219e2         |
| MWXS212101D3_R3       | Quality Control | 1.58e6     | N/A           | 2.90     | 350.9 | 0.0000      | 1.709201e2         |
| A21233250b_b          | Unknown         | 2.54e3     | N/A           | 2.90     | 3.0   | N/A         | 4.664084e-5        |
| A21233251b_b          | Unknown         | N/A        | N/A           | N/A      | N/A   | N/A         | N/A                |
| A21233252b_b          | Unknown         | N/A        | N/A           | N/A      | N/A   | N/A         | N/A                |
| A21233253b_b          | Unknown         | 3.32e4     | N/A           | 2.93     | 7.9   | N/A         | 3.313381e0         |
| A21233254b_b          | Unknown         | 1.97e4     | N/A           | 2.93     | 7.0   | N/A         | 1.851450e0         |
| A21233255b_b          | Unknown         | 3.49e4     | N/A           | 2.94     | 8.5   | N/A         | 3.499138e0         |
| A21233256b_b          | Unknown         | 7.77e4     | N/A           | 2.94     | 20.8  | N/A         | 8.124785e0         |
| A21233257b_b          | Unknown         | 8.62e4     | N/A           | 2.94     | 13.3  | N/A         | 9.041739e0         |
| A21233258b_b          | Unknown         | 2.27e4     | N/A           | 2.94     | 9.5   | N/A         | 2.181428e0         |
| A21233259b_b          | Unknown         | N/A        | N/A           | N/A      | N/A   | N/A         | N/A                |
| A21233260b_b          | Unknown         | N/A        | N/A           | N/A      | N/A   | N/A         | N/A                |
| A21233261b_b          | Unknown         | N/A        | N/A           | N/A      | N/A   | N/A         | N/A                |
| A21233262b_b          | Unknown         | N/A        | N/A           | N/A      | N/A   | N/A         | N/A                |
| A21233263b_b          | Unknown         | 4.90e3     | N/A           | 2.94     | 2.1   | N/A         | 2.552990e-1        |
| A21233264b_b          | Unknown         | N/A        | N/A           | N/A      | N/A   | N/A         | N/A                |
| A21233265b_b          | Unknown         | 2.85e4     | N/A           | 2.93     | 4.6   | N/A         | 2.806609e0         |
| A21233266b_b          | Unknown         | 1.68e4     | N/A           | 2.93     | 3.4   | N/A         | 1.546727e0         |
| A21233267b_b          | Unknown         | 9.09e3     | N/A           | 2.94     | 2.4   | N/A         | 7.082204e-1        |

Compound name: Narirutin

Regression Equation:  $y = 9247.89141x + 2541.55417$  ( $r = 0.99843$ ) (weighting:  $1/x$ )

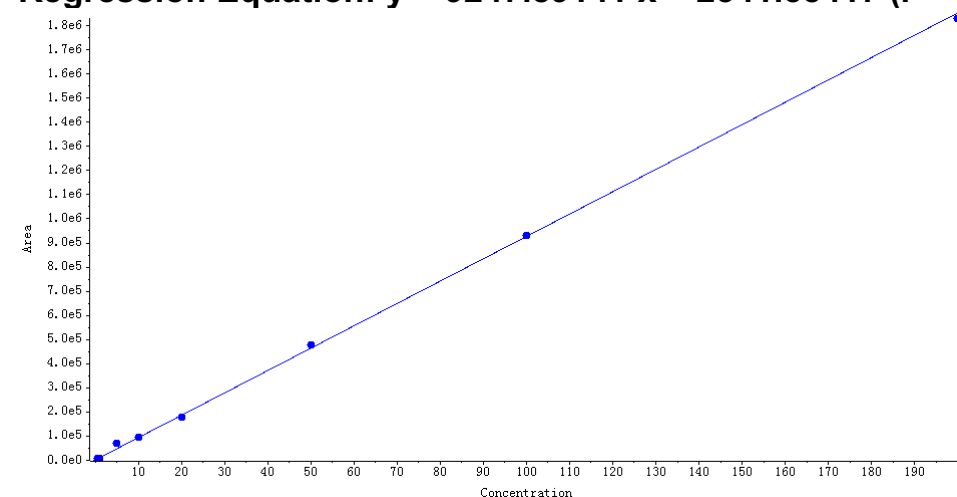

## Peak Review

Blank

Narirutin AREA:N/A S/N:N/A

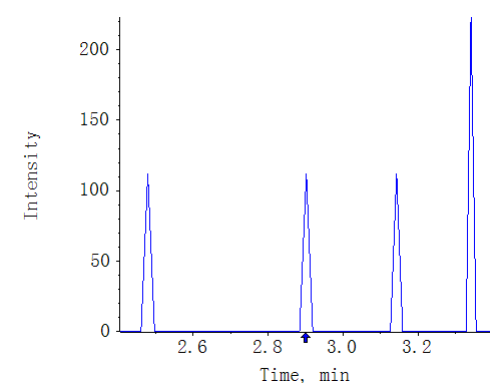

V1.0\_MWMS\_20211021\_1

Narirutin AREA:1.57e6 S/N:365.7

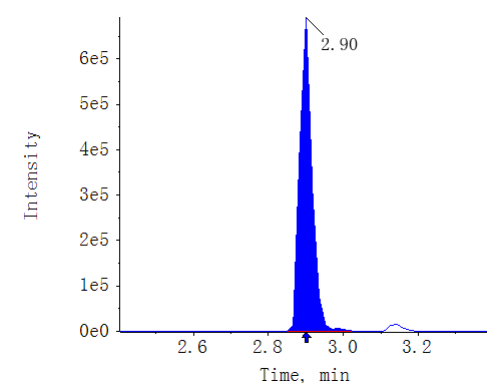

A21233250b\_b

Narirutin AREA:2.54e3 S/N:3.0

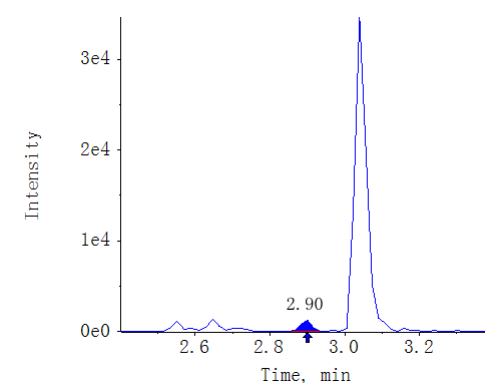

A21233251b\_b

Narirutin AREA:N/A S/N:N/A

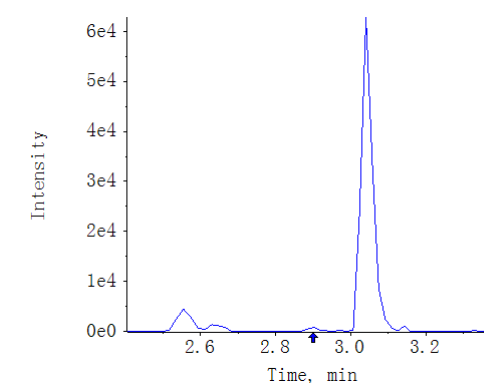

A21233252b\_b

Narirutin AREA:N/A S/N:N/A

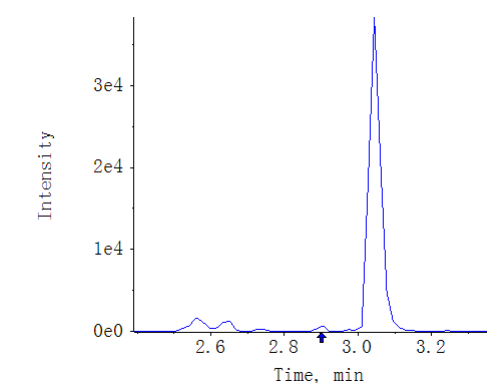

A21233253b\_b

Narirutin AREA:3.32e4 S/N:7.9

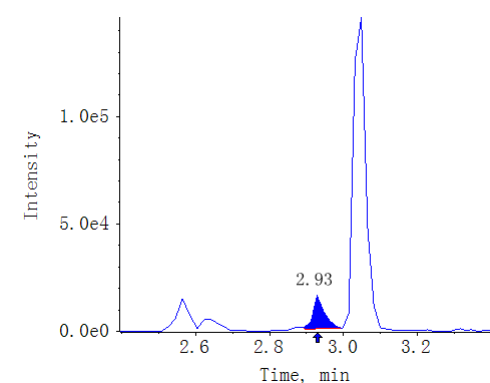

A21233254b\_b

Narirutin AREA:1.97e4 S/N:7.0

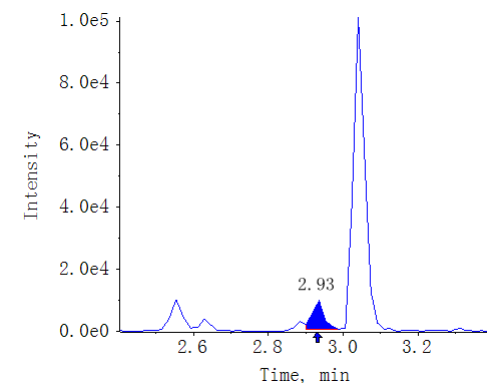

A21233255b\_b

Narirutin AREA:3.49e4 S/N:8.5

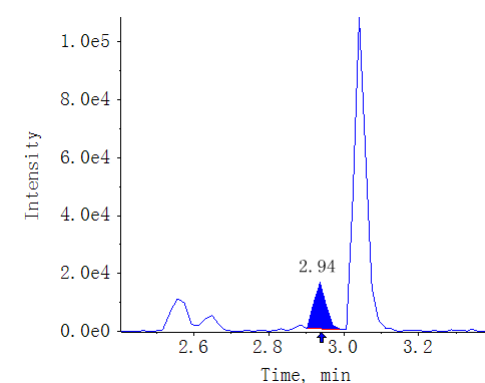

A21233256b\_b

Narirutin AREA:7.77e4 S/N:20.8

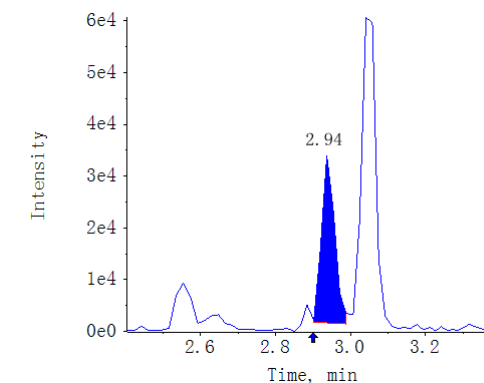

A21233257b\_b

Narirutin AREA:8.62e4 S/N:13.3

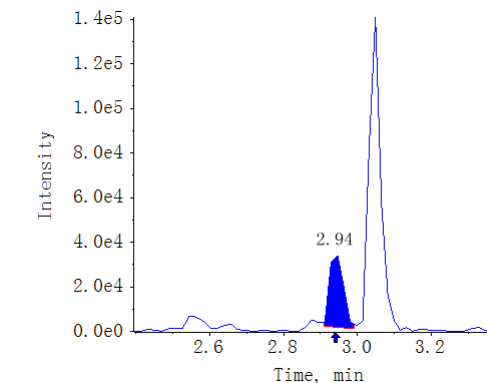

**A21233258b\_b**

Narirutin AREA:2.27e4 S/N:9.5

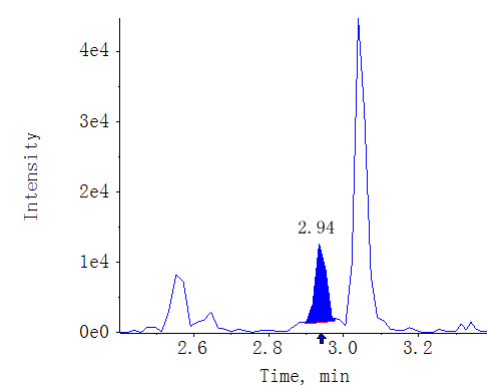

**A21233259b\_b**

Narirutin AREA:N/A S/N:N/A

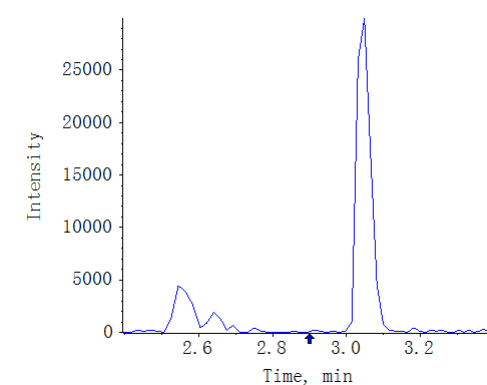

**A21233260b\_b**

Narirutin AREA:N/A S/N:N/A

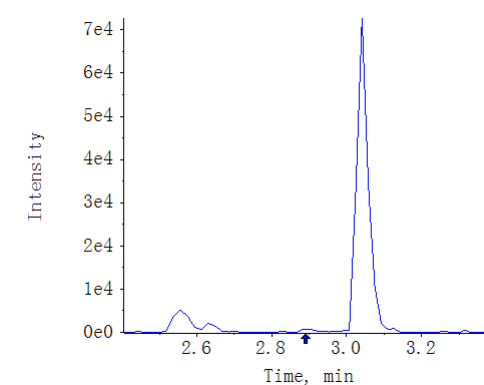

**A21233261b\_b**

Narirutin AREA:N/A S/N:N/A

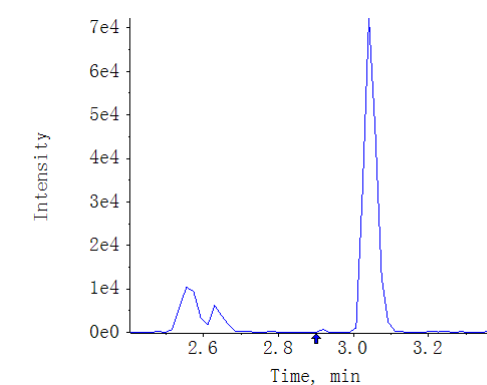

**A21233262b\_b**

Narirutin AREA:N/A S/N:N/A

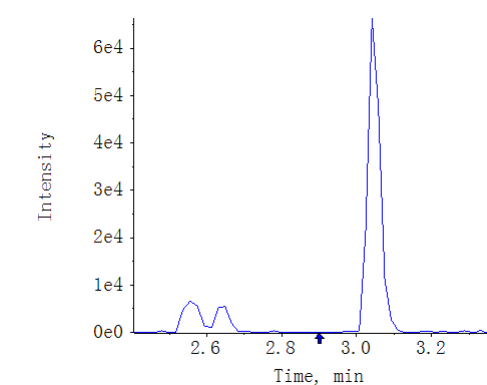

**A21233263b\_b**

Narirutin AREA:4.90e3 S/N:2.1

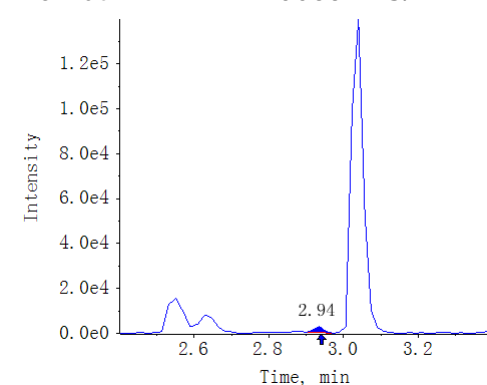

**A21233264b\_b**

Narirutin AREA:N/A S/N:N/A

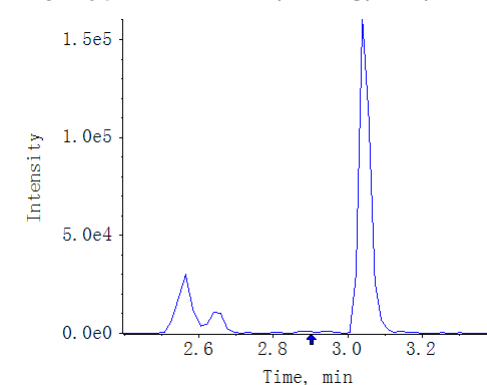

**A21233265b\_b**

Narirutin AREA:2.85e4 S/N:4.6

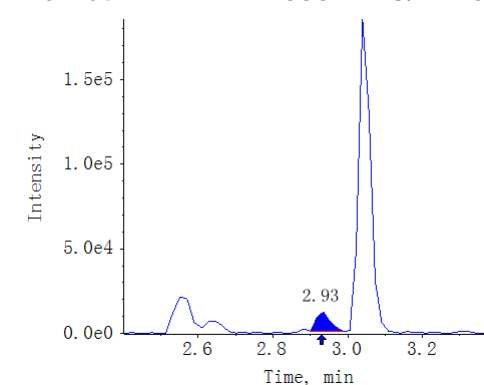

**A21233266b\_b**

Narirutin AREA:1.68e4 S/N:3.4

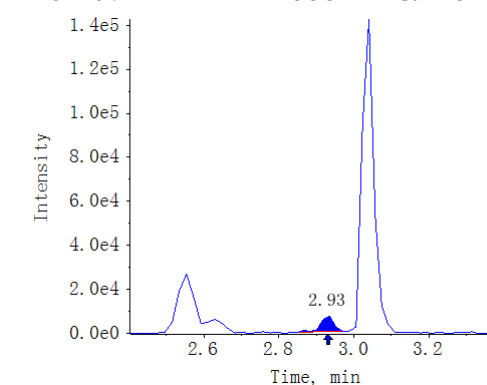

**A21233267b\_b**

Narirutin AREA:9.09e3 S/N:2.4

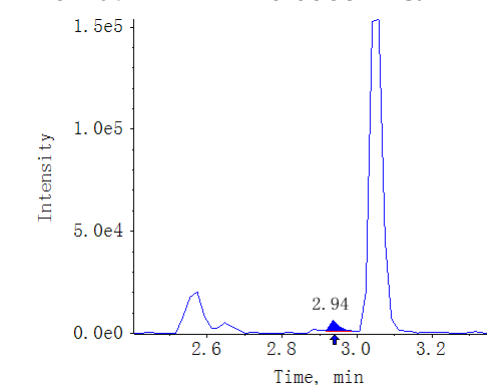

|                    |                                                    |                 |                      |
|--------------------|----------------------------------------------------|-----------------|----------------------|
| Result Table       | MWXS-21-2101D-3_18_WH6500-5_A20-3_V1.0_TY_20211028 | Algorithm Used  | MQ4                  |
| Acquisition Method | Flavonoids_V1.0_WH6500-5_LT_20211025.dam           | Instrument Name | QTRAP 6500+ Low Mass |
| Project            | N/A                                                | Analytes QTY    | 204:44               |

**Compound name: Taxifolin (303.1 / 125.0)**

| Sample Name           | Sample Type     | Area (cps) | Is Area (cps) | RT (min) | S/N   | Target Conc | Calculated Conc.() |
|-----------------------|-----------------|------------|---------------|----------|-------|-------------|--------------------|
| STD_0.5nM             | Standard        | N/A        | N/A           | N/A      | N/A   | 0.5000      | N/A                |
| STD_1nM               | Standard        | 6.50e3     | N/A           | 3.04     | 24.2  | 1.0000      | 7.982206e-1        |
| STD_5nM               | Standard        | 2.97e4     | N/A           | 3.04     | 57.0  | 5.0000      | 6.833325e0         |
| STD_10nM              | Standard        | 3.61e4     | N/A           | 3.04     | 50.1  | 10.0000     | 8.511472e0         |
| STD_20nM              | Standard        | 7.83e4     | N/A           | 3.04     | 81.0  | 20.0000     | 1.947426e1         |
| STD_50nM              | Standard        | 2.02e5     | N/A           | 3.04     | 140.9 | 50.0000     | 5.165133e1         |
| STD_100nM             | Standard        | 3.75e5     | N/A           | 3.05     | 131.4 | 100.0000    | 9.671414e1         |
| STD_200nM             | Standard        | 7.80e5     | N/A           | 3.04     | 118.1 | 200.0000    | 2.020172e2         |
| STD_500nM             | Standard        | N/A        | N/A           | N/A      | N/A   | 500.0000    | N/A                |
| STD_1000nM            | Standard        | N/A        | N/A           | N/A      | N/A   | 1000.0000   | N/A                |
| STD_2000nM            | Standard        | N/A        | N/A           | N/A      | N/A   | 2000.0000   | N/A                |
| V1.0_MW_RQC1_20211018 | Quality Control | N/A        | N/A           | N/A      | N/A   | 0.0000      | N/A                |
| Blank                 | Unknown         | N/A        | N/A           | N/A      | N/A   | N/A         | N/A                |
| V1.0_MWMS_20211021_1  | Unknown         | 6.08e5     | N/A           | 3.05     | 105.4 | N/A         | 1.573409e2         |
| MWXS212101D3_R1       | Quality Control | 6.33e5     | N/A           | 3.04     | 144.7 | 0.0000      | 1.637165e2         |
| MWXS212101D3_R2       | Quality Control | 6.32e5     | N/A           | 3.05     | 119.4 | 0.0000      | 1.634424e2         |
| MWXS212101D3_R3       | Quality Control | 6.28e5     | N/A           | 3.05     | 128.1 | 0.0000      | 1.625377e2         |
| A21233250b_b          | Unknown         | N/A        | N/A           | N/A      | N/A   | N/A         | N/A                |
| A21233251b_b          | Unknown         | N/A        | N/A           | N/A      | N/A   | N/A         | N/A                |
| A21233252b_b          | Unknown         | N/A        | N/A           | N/A      | N/A   | N/A         | N/A                |
| A21233253b_b          | Unknown         | 1.62e4     | N/A           | 3.05     | 27.0  | N/A         | 3.330992e0         |
| A21233254b_b          | Unknown         | 2.36e4     | N/A           | 3.05     | 39.5  | N/A         | 5.244302e0         |
| A21233255b_b          | Unknown         | 3.01e4     | N/A           | 3.05     | 45.1  | N/A         | 6.948939e0         |
| A21233256b_b          | Unknown         | 2.67e4     | N/A           | 3.05     | 38.1  | N/A         | 6.047158e0         |
| A21233257b_b          | Unknown         | 4.72e4     | N/A           | 3.05     | 49.9  | N/A         | 1.139216e1         |
| A21233258b_b          | Unknown         | 3.24e4     | N/A           | 3.05     | 36.0  | N/A         | 7.529071e0         |
| A21233259b_b          | Unknown         | N/A        | N/A           | N/A      | N/A   | N/A         | N/A                |
| A21233260b_b          | Unknown         | N/A        | N/A           | N/A      | N/A   | N/A         | N/A                |
| A21233261b_b          | Unknown         | N/A        | N/A           | N/A      | N/A   | N/A         | N/A                |
| A21233262b_b          | Unknown         | 1.13e4     | N/A           | 3.05     | 18.8  | N/A         | 2.045304e0         |
| A21233263b_b          | Unknown         | 4.94e4     | N/A           | 3.04     | 55.6  | N/A         | 1.196953e1         |
| A21233264b_b          | Unknown         | 2.41e4     | N/A           | 3.05     | 32.8  | N/A         | 5.386396e0         |
| A21233265b_b          | Unknown         | 5.50e4     | N/A           | 3.05     | 49.0  | N/A         | 1.342865e1         |
| A21233266b_b          | Unknown         | 4.19e4     | N/A           | 3.04     | 52.5  | N/A         | 1.000466e1         |
| A21233267b_b          | Unknown         | 4.91e4     | N/A           | 3.05     | 45.3  | N/A         | 1.189459e1         |

Compound name: Taxifolin  
Regression Equation:  $y = 3843.11116x + 3436.79163$  ( $r = 0.99839$ ) (weighting:  $1/x$ )

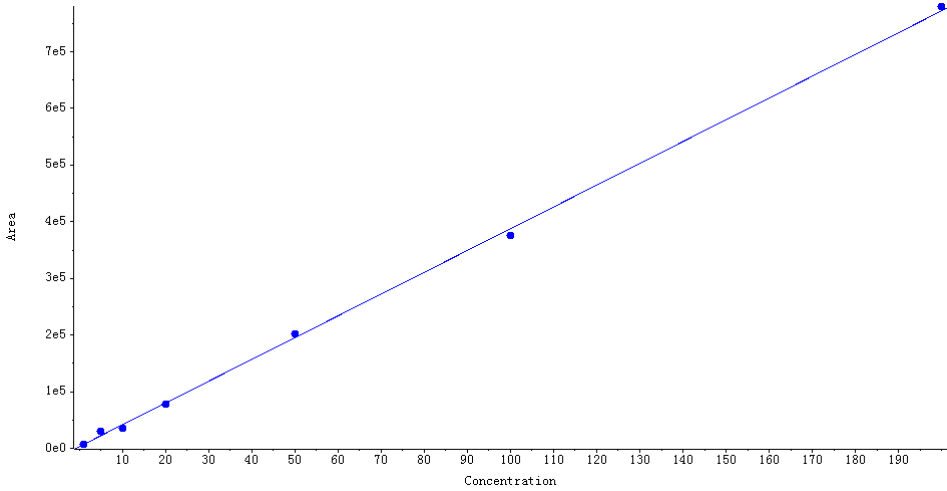

Peak Review

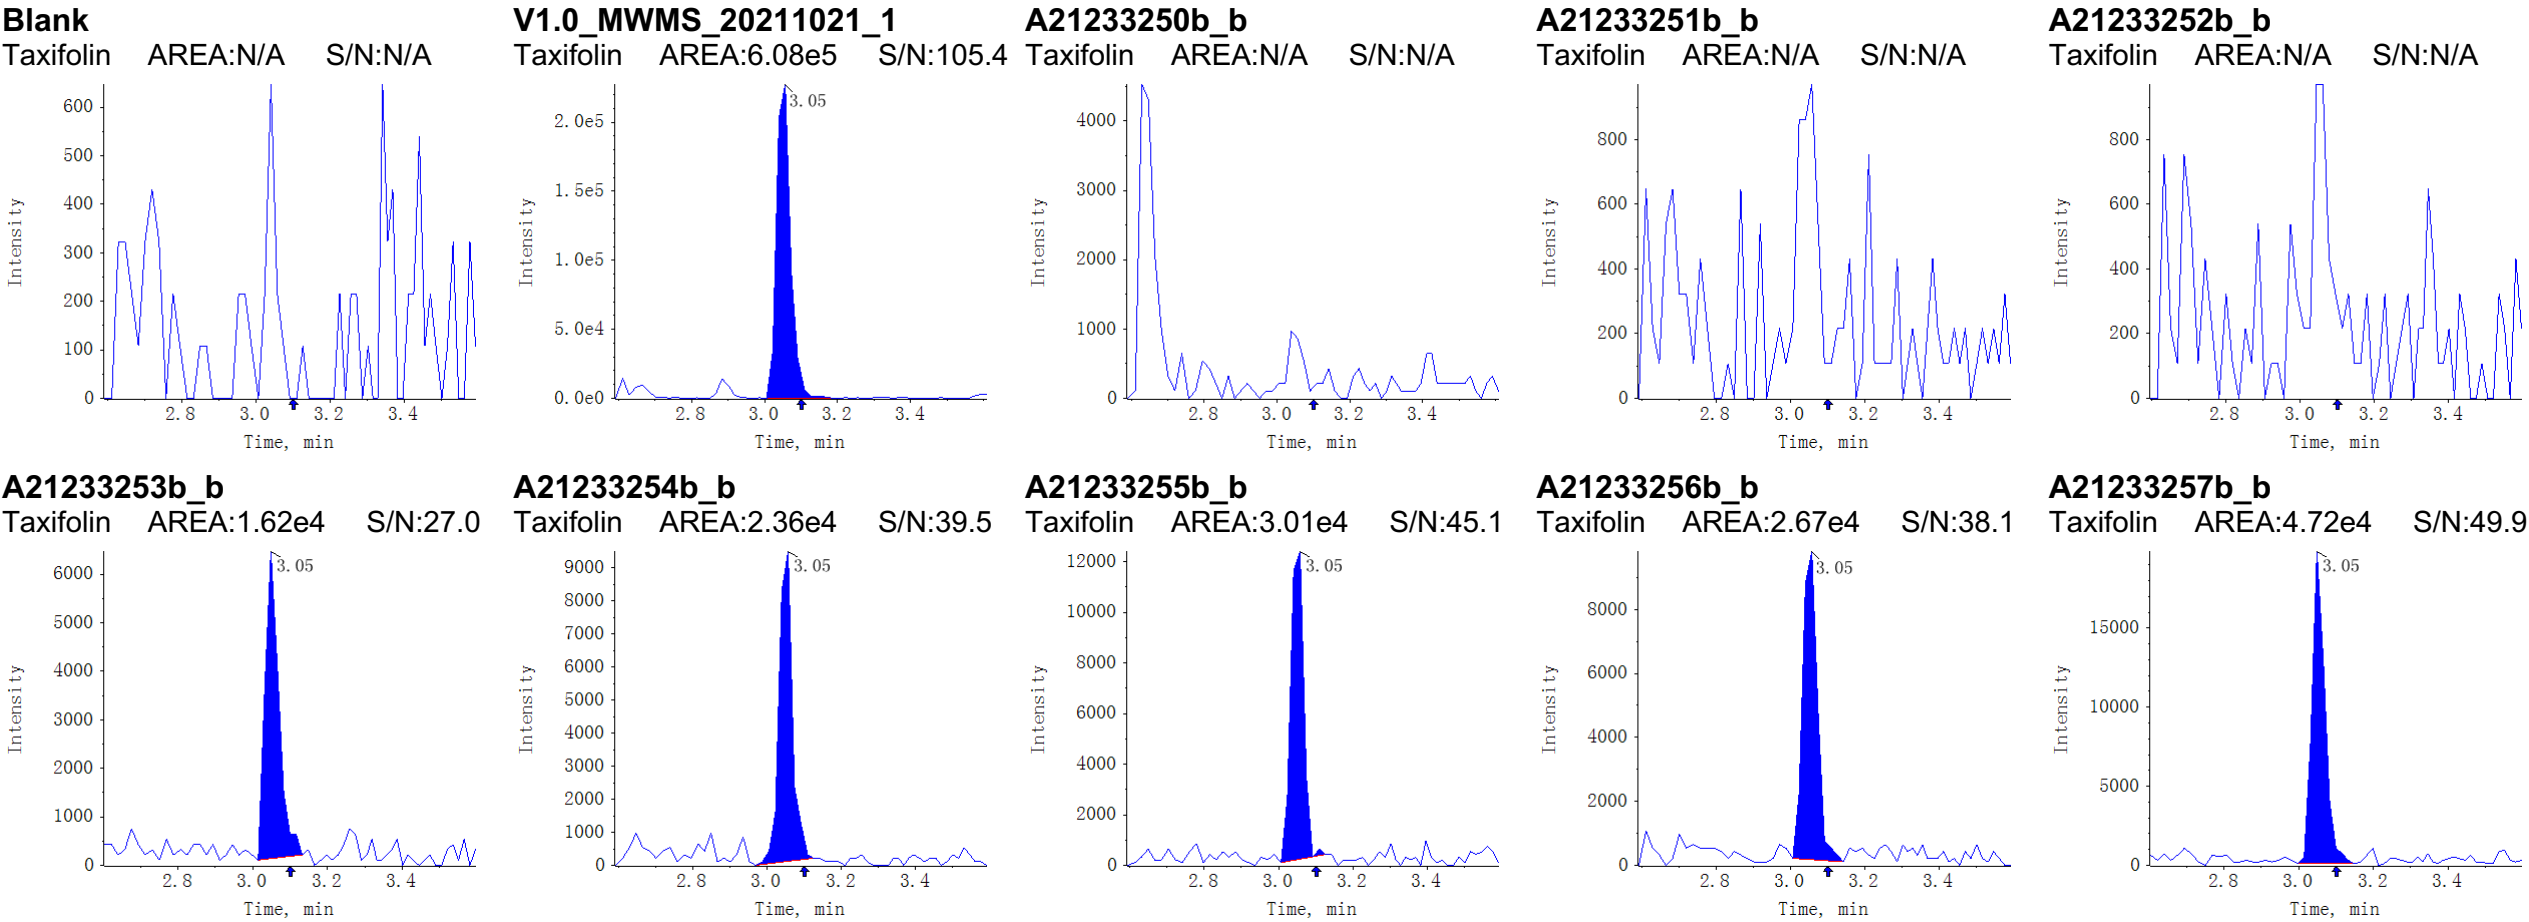

**A21233258b\_b**

Taxifolin AREA:3.24e4 S/N:36.0

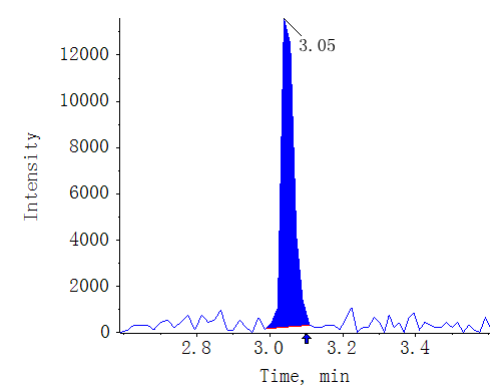

**A21233259b\_b**

Taxifolin AREA:N/A S/N:N/A

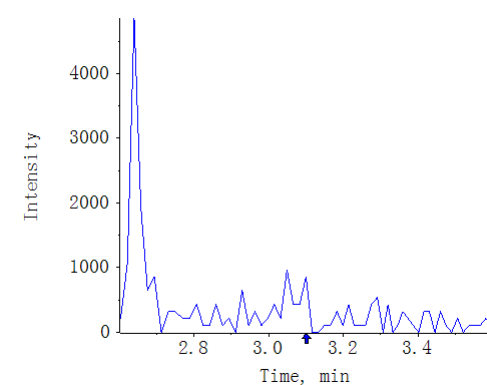

**A21233260b\_b**

Taxifolin AREA:N/A S/N:N/A

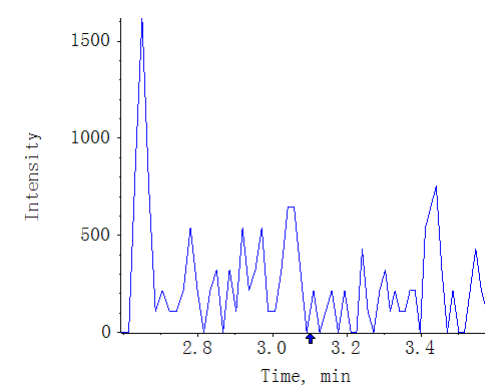

**A21233261b\_b**

Taxifolin AREA:N/A S/N:N/A

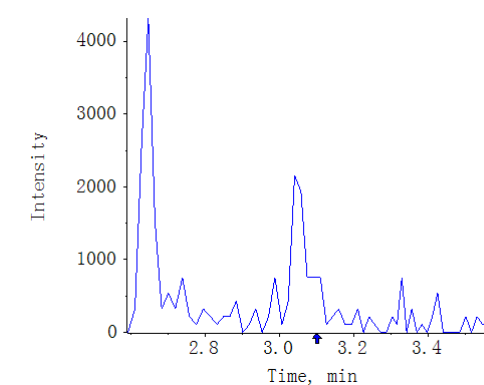

**A21233262b\_b**

Taxifolin AREA:1.13e4 S/N:18.8

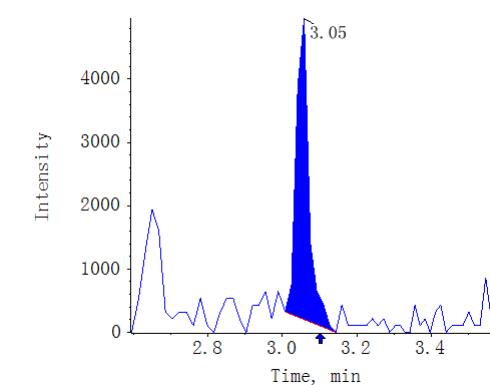

**A21233263b\_b**

Taxifolin AREA:4.94e4 S/N:55.6

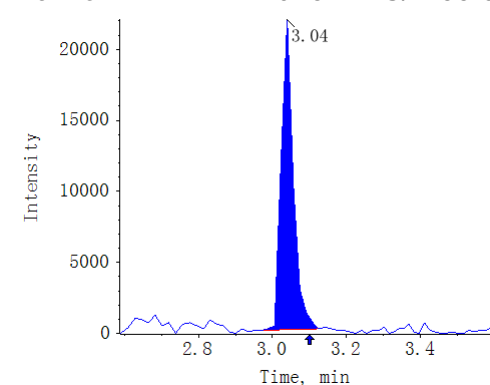

**A21233264b\_b**

Taxifolin AREA:2.41e4 S/N:32.8

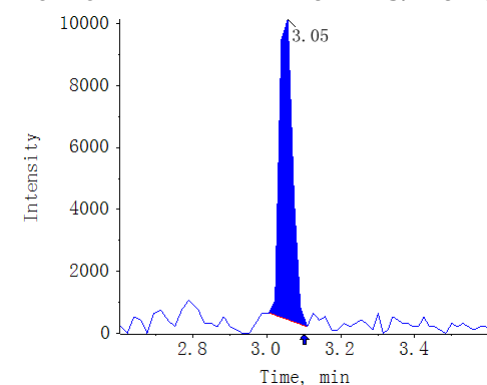

**A21233265b\_b**

Taxifolin AREA:5.50e4 S/N:49.0

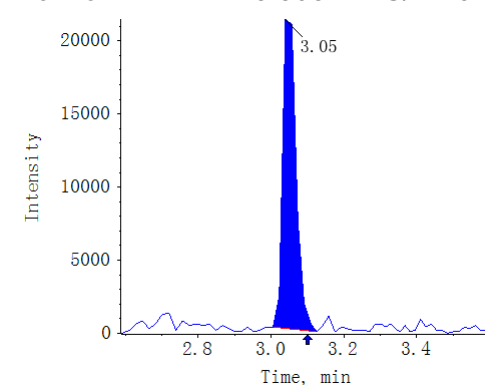

**A21233266b\_b**

Taxifolin AREA:4.19e4 S/N:52.5

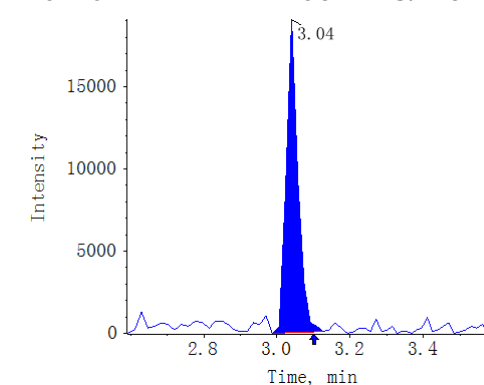

**A21233267b\_b**

Taxifolin AREA:4.91e4 S/N:45.3

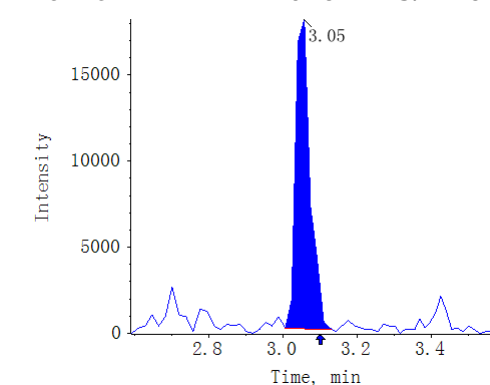

|                           |                                                    |                        |                      |
|---------------------------|----------------------------------------------------|------------------------|----------------------|
| <b>Result Table</b>       | MWXS-21-2101D-3_18_WH6500-5_A20-3_V1.0_TY_20211028 | <b>Algorithm Used</b>  | MQ4                  |
| <b>Acquisition Method</b> | Flavonoids_V1.0_WH6500-5_LT_20211025.dam           | <b>Instrument Name</b> | QTRAP 6500+ Low Mass |
| <b>Project</b>            | N/A                                                | <b>Analytes QTY</b>    | 204:8                |

**Compound name: Isoorientin (447.1 / 327.1)**

| Sample Name           | Sample Type     | Area (cps) | Is Area (cps) | RT (min) | S/N   | Target Conc | Calculated Conc.() |
|-----------------------|-----------------|------------|---------------|----------|-------|-------------|--------------------|
| STD_0.5nM             | Standard        | 4.14e3     | N/A           | 2.47     | 10.6  | 0.5000      | 3.056077e-1        |
| STD_1nM               | Standard        | 9.84e3     | N/A           | 2.45     | 18.4  | 1.0000      | 9.171458e-1        |
| STD_5nM               | Standard        | 6.26e4     | N/A           | 2.45     | 40.5  | 5.0000      | 6.580638e0         |
| STD_10nM              | Standard        | 9.79e4     | N/A           | 2.46     | 41.7  | 10.0000     | 1.036990e1         |
| STD_20nM              | Standard        | 1.90e5     | N/A           | 2.46     | 68.5  | 20.0000     | 2.027129e1         |
| STD_50nM              | Standard        | 5.24e5     | N/A           | 2.46     | 79.3  | 50.0000     | 5.611406e1         |
| STD_100nM             | Standard        | 9.76e5     | N/A           | 2.46     | 60.0  | 100.0000    | 1.045938e2         |
| STD_200nM             | Standard        | 1.75e6     | N/A           | 2.45     | 55.1  | 200.0000    | 1.873475e2         |
| STD_500nM             | Standard        | N/A        | N/A           | N/A      | N/A   | 500.0000    | N/A                |
| STD_1000nM            | Standard        | N/A        | N/A           | N/A      | N/A   | 1000.0000   | N/A                |
| STD_2000nM            | Standard        | N/A        | N/A           | N/A      | N/A   | 2000.0000   | N/A                |
| V1.0_MW_RQC1_20211018 | Quality Control | 2.01e8     | N/A           | 2.45     | 189.3 | 0.0000      | 2.152844e4         |
| Blank                 | Unknown         | N/A        | N/A           | N/A      | N/A   | N/A         | N/A                |
| V1.0_MWMS_20211021_1  | Unknown         | 1.55e6     | N/A           | 2.46     | 63.8  | N/A         | 1.660239e2         |
| MWXS212101D3_R1       | Quality Control | 1.80e6     | N/A           | 2.46     | 66.4  | 0.0000      | 1.933496e2         |
| MWXS212101D3_R2       | Quality Control | 1.73e6     | N/A           | 2.46     | 82.6  | 0.0000      | 1.853495e2         |
| MWXS212101D3_R3       | Quality Control | 1.82e6     | N/A           | 2.46     | 78.0  | 0.0000      | 1.954700e2         |
| A21233250b_b          | Unknown         | N/A        | N/A           | N/A      | N/A   | N/A         | N/A                |
| A21233251b_b          | Unknown         | N/A        | N/A           | N/A      | N/A   | N/A         | N/A                |
| A21233252b_b          | Unknown         | N/A        | N/A           | N/A      | N/A   | N/A         | N/A                |
| A21233253b_b          | Unknown         | N/A        | N/A           | N/A      | N/A   | N/A         | N/A                |
| A21233254b_b          | Unknown         | N/A        | N/A           | N/A      | N/A   | N/A         | N/A                |
| A21233255b_b          | Unknown         | N/A        | N/A           | N/A      | N/A   | N/A         | N/A                |
| A21233256b_b          | Unknown         | 1.50e4     | N/A           | 2.46     | 6.0   | N/A         | 1.470054e0         |
| A21233257b_b          | Unknown         | N/A        | N/A           | N/A      | N/A   | N/A         | N/A                |
| A21233258b_b          | Unknown         | N/A        | N/A           | N/A      | N/A   | N/A         | N/A                |
| A21233259b_b          | Unknown         | N/A        | N/A           | N/A      | N/A   | N/A         | N/A                |
| A21233260b_b          | Unknown         | N/A        | N/A           | N/A      | N/A   | N/A         | N/A                |
| A21233261b_b          | Unknown         | 2.00e4     | N/A           | 2.46     | 3.6   | N/A         | 2.003869e0         |
| A21233262b_b          | Unknown         | N/A        | N/A           | N/A      | N/A   | N/A         | N/A                |
| A21233263b_b          | Unknown         | N/A        | N/A           | N/A      | N/A   | N/A         | N/A                |
| A21233264b_b          | Unknown         | N/A        | N/A           | N/A      | N/A   | N/A         | N/A                |
| A21233265b_b          | Unknown         | 4.15e4     | N/A           | 2.47     | 6.0   | N/A         | 4.320023e0         |
| A21233266b_b          | Unknown         | 1.23e4     | N/A           | 2.47     | 3.5   | N/A         | 1.177157e0         |
| A21233267b_b          | Unknown         | 4.38e4     | N/A           | 2.50     | 7.5   | N/A         | 4.564993e0         |

Compound name: Isoorientin  
Regression Equation:  $y = 9318.16122x + 1291.79077$  ( $r = 0.99681$ ) (weighting:  $1/x$ )

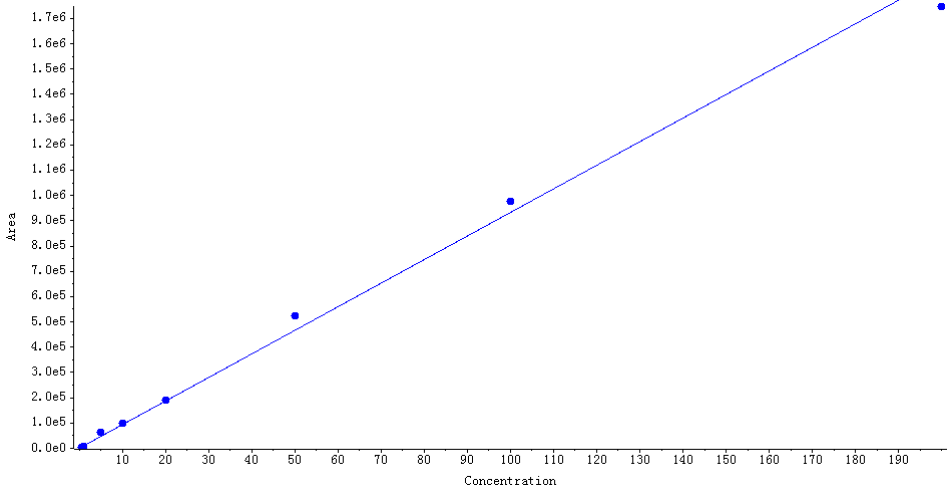

Peak Review

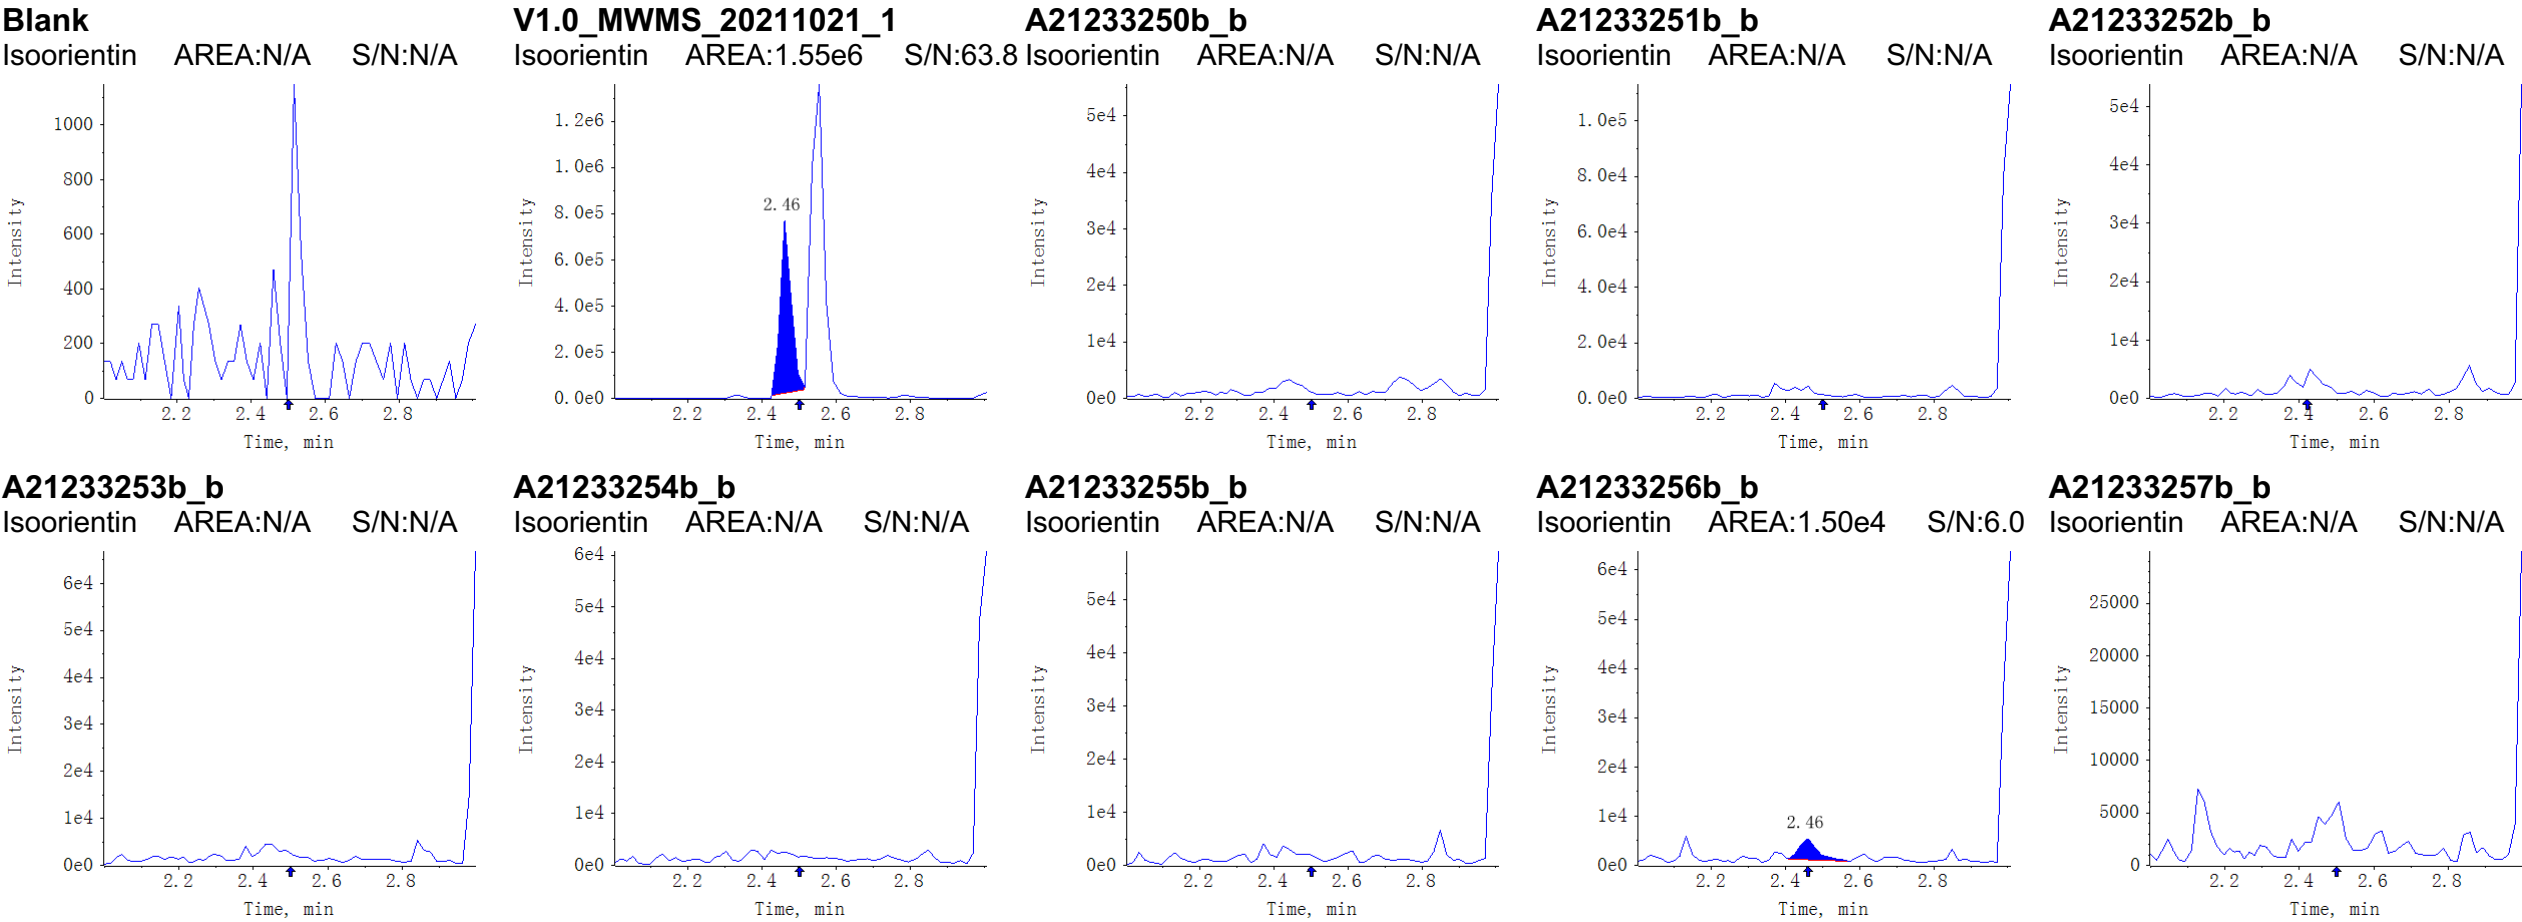

**A21233258b\_b**

Isoorientin AREA:N/A S/N:N/A

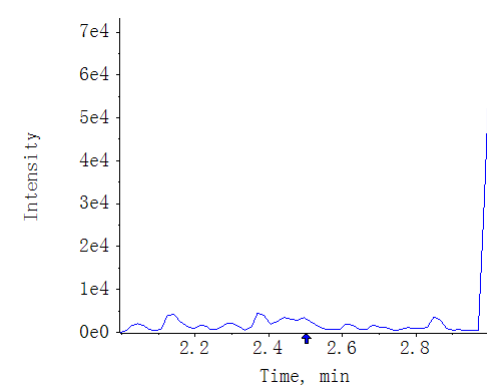

**A21233259b\_b**

Isoorientin AREA:N/A S/N:N/A

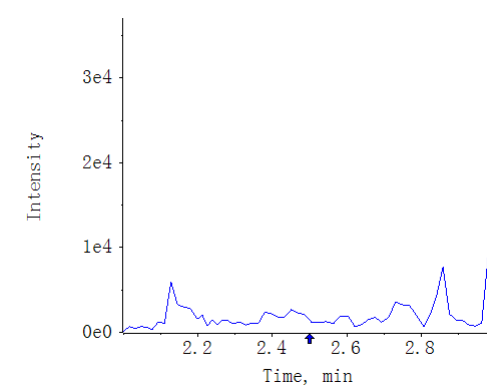

**A21233260b\_b**

Isoorientin AREA:N/A S/N:N/A

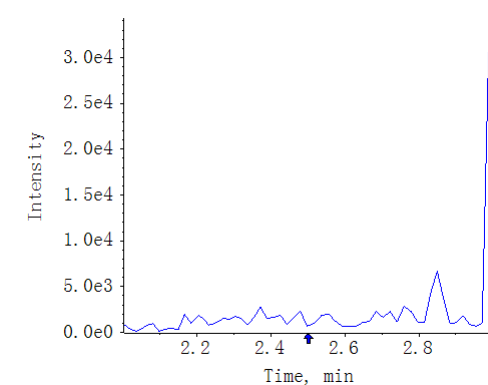

**A21233261b\_b**

Isoorientin AREA:2.00e4 S/N:3.6

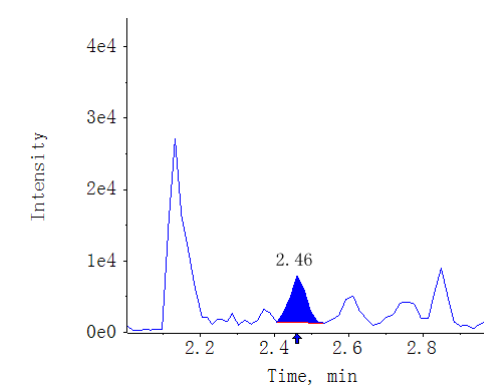

**A21233262b\_b**

Isoorientin AREA:N/A S/N:N/A

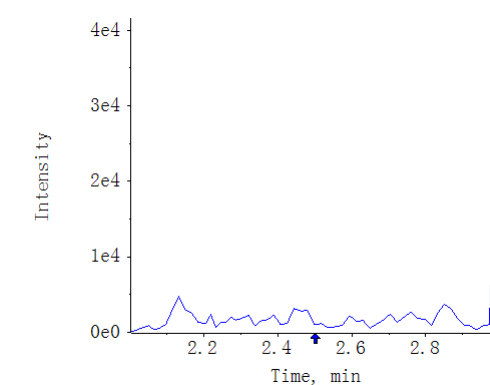

**A21233263b\_b**

Isoorientin AREA:N/A S/N:N/A

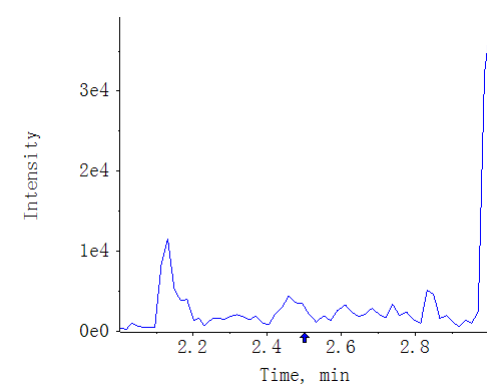

**A21233264b\_b**

Isoorientin AREA:N/A S/N:N/A

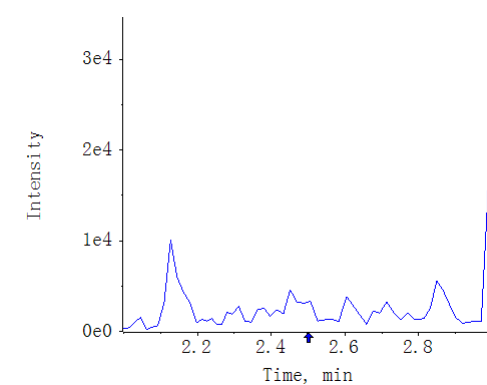

**A21233265b\_b**

Isoorientin AREA:4.15e4 S/N:6.0

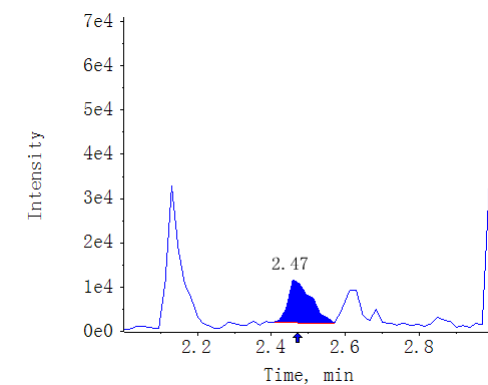

**A21233266b\_b**

Isoorientin AREA:1.23e4 S/N:3.5

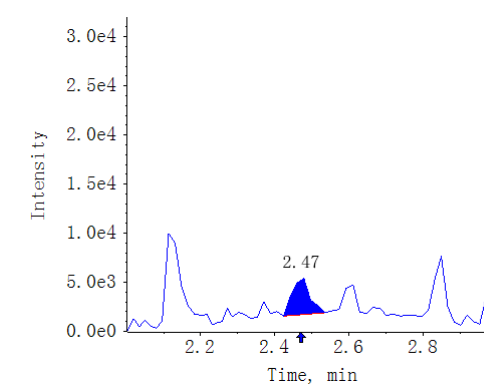

**A21233267b\_b**

Isoorientin AREA:4.38e4 S/N:7.5

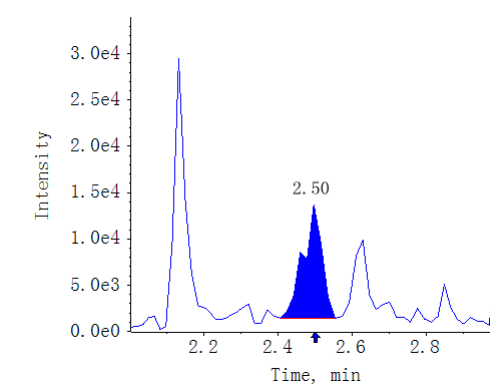

|                    |                                                    |                 |                      |
|--------------------|----------------------------------------------------|-----------------|----------------------|
| Result Table       | MWXS-21-2101D-3_18_WH6500-5_A20-3_V1.0_TY_20211028 | Algorithm Used  | MQ4                  |
| Acquisition Method | Flavonoids_V1.0_WH6500-5_LT_20211025.dam           | Instrument Name | QTRAP 6500+ Low Mass |
| Project            | N/A                                                | Analytes QTY    | 204:18               |

**Compound name: Scutellarin (461.1 / 285.1)**

| Sample Name           | Sample Type     | Area (cps) | Is Area (cps) | RT (min) | S/N   | Target Conc | Calculated Conc.() |
|-----------------------|-----------------|------------|---------------|----------|-------|-------------|--------------------|
| STD_0.5nM             | Standard        | 4.71e3     | N/A           | 2.77     | 15.4  | 0.5000      | 3.060360e-1        |
| STD_1nM               | Standard        | 1.03e4     | N/A           | 2.75     | 31.0  | 1.0000      | 1.051839e0         |
| STD_5nM               | Standard        | 5.43e4     | N/A           | 2.76     | 73.7  | 5.0000      | 6.867594e0         |
| STD_10nM              | Standard        | 8.14e4     | N/A           | 2.76     | 90.9  | 10.0000     | 1.044781e1         |
| STD_20nM              | Standard        | 1.44e5     | N/A           | 2.75     | 122.0 | 20.0000     | 1.870851e1         |
| STD_50nM              | Standard        | 3.74e5     | N/A           | 2.76     | 142.4 | 50.0000     | 4.911822e1         |
| STD_100nM             | Standard        | N/A        | N/A           | N/A      | N/A   | 100.0000    | N/A                |
| STD_200nM             | Standard        | N/A        | N/A           | N/A      | N/A   | 200.0000    | N/A                |
| STD_500nM             | Standard        | N/A        | N/A           | N/A      | N/A   | 500.0000    | N/A                |
| STD_1000nM            | Standard        | N/A        | N/A           | N/A      | N/A   | 1000.0000   | N/A                |
| STD_2000nM            | Standard        | N/A        | N/A           | N/A      | N/A   | 2000.0000   | N/A                |
| V1.0_MW_RQC1_20211018 | Quality Control | 1.34e5     | N/A           | 2.78     | 8.2   | 0.0000      | 1.740114e1         |
| Blank                 | Unknown         | N/A        | N/A           | N/A      | N/A   | N/A         | N/A                |
| V1.0_MWMS_20211021_1  | Unknown         | 1.23e6     | N/A           | 2.76     | 182.6 | N/A         | 1.625174e2         |
| MWXS212101D3_R1       | Quality Control | 1.26e6     | N/A           | 2.76     | 154.6 | 0.0000      | 1.662598e2         |
| MWXS212101D3_R2       | Quality Control | 1.24e6     | N/A           | 2.76     | 214.7 | 0.0000      | 1.635520e2         |
| MWXS212101D3_R3       | Quality Control | 1.24e6     | N/A           | 2.76     | 217.7 | 0.0000      | 1.642279e2         |
| A21233250b_b          | Unknown         | N/A        | N/A           | N/A      | N/A   | N/A         | N/A                |
| A21233251b_b          | Unknown         | N/A        | N/A           | N/A      | N/A   | N/A         | N/A                |
| A21233252b_b          | Unknown         | N/A        | N/A           | N/A      | N/A   | N/A         | N/A                |
| A21233253b_b          | Unknown         | N/A        | N/A           | N/A      | N/A   | N/A         | N/A                |
| A21233254b_b          | Unknown         | N/A        | N/A           | N/A      | N/A   | N/A         | N/A                |
| A21233255b_b          | Unknown         | N/A        | N/A           | N/A      | N/A   | N/A         | N/A                |
| A21233256b_b          | Unknown         | N/A        | N/A           | N/A      | N/A   | N/A         | N/A                |
| A21233257b_b          | Unknown         | N/A        | N/A           | N/A      | N/A   | N/A         | N/A                |
| A21233258b_b          | Unknown         | N/A        | N/A           | N/A      | N/A   | N/A         | N/A                |
| A21233259b_b          | Unknown         | N/A        | N/A           | N/A      | N/A   | N/A         | N/A                |
| A21233260b_b          | Unknown         | 3.94e4     | N/A           | 2.77     | 55.5  | N/A         | 4.889510e0         |
| A21233261b_b          | Unknown         | N/A        | N/A           | N/A      | N/A   | N/A         | N/A                |
| A21233262b_b          | Unknown         | N/A        | N/A           | N/A      | N/A   | N/A         | N/A                |
| A21233263b_b          | Unknown         | N/A        | N/A           | N/A      | N/A   | N/A         | N/A                |
| A21233264b_b          | Unknown         | N/A        | N/A           | N/A      | N/A   | N/A         | N/A                |
| A21233265b_b          | Unknown         | N/A        | N/A           | N/A      | N/A   | N/A         | N/A                |
| A21233266b_b          | Unknown         | 1.23e4     | N/A           | 2.77     | 15.2  | N/A         | 1.306075e0         |
| A21233267b_b          | Unknown         | N/A        | N/A           | N/A      | N/A   | N/A         | N/A                |

Compound name: Scutellarin  
Regression Equation:  $y = 7559.63455x + 2397.74094$  ( $r = 0.99415$ ) (weighting:  $1/x$ )

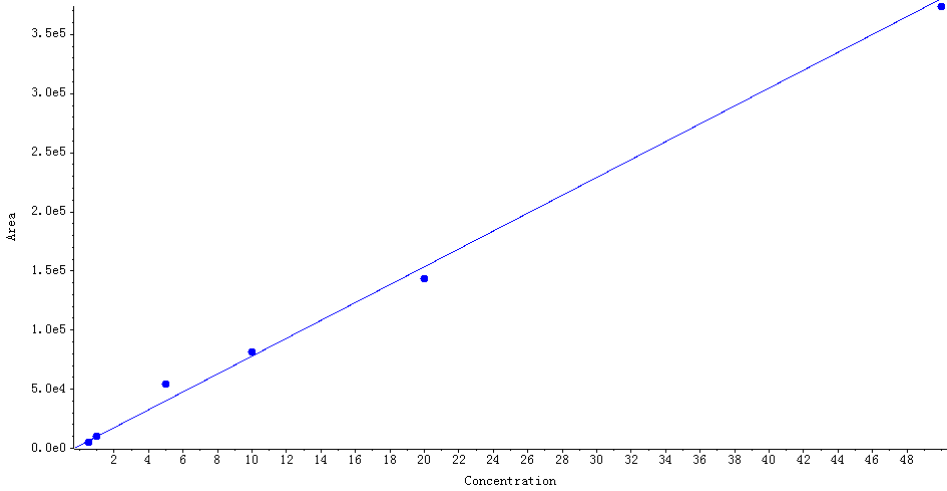

Peak Review

Blank  
Scutellarin AREA:N/A S/N:N/A

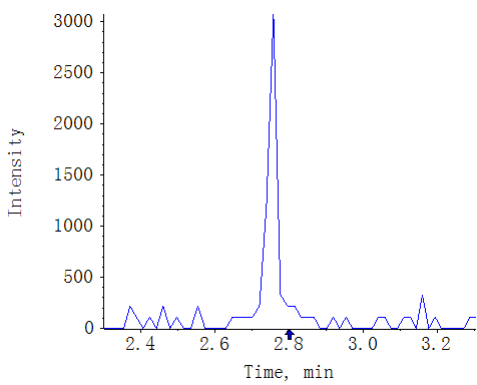

V1.0\_MWMS\_20211021\_1  
Scutellarin AREA:1.23e6 S/N:182.6

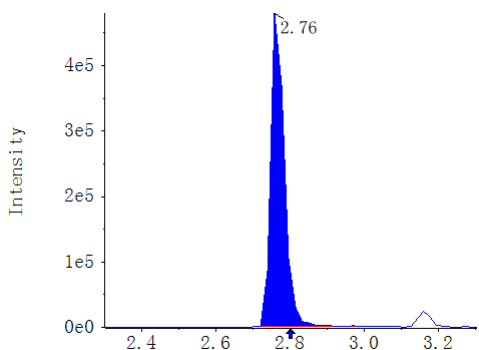

A21233250b\_b  
Scutellarin AREA:N/A S/N:N/A

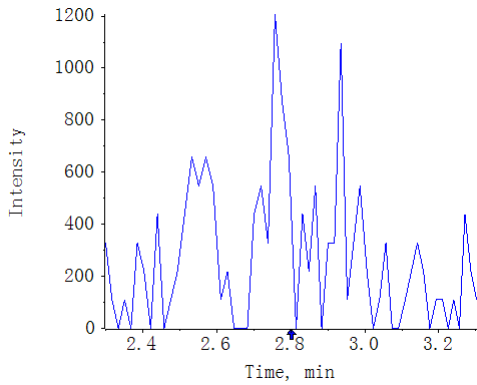

A21233251b\_b  
Scutellarin AREA:N/A S/N:N/A

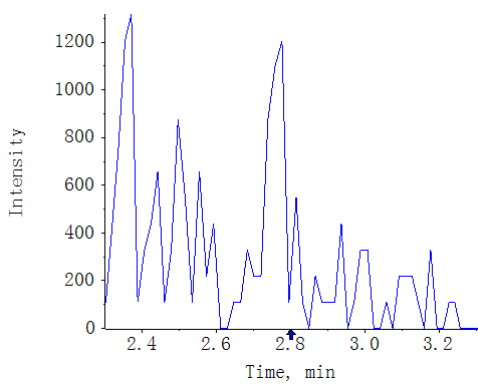

A21233252b\_b  
Scutellarin AREA:N/A S/N:N/A

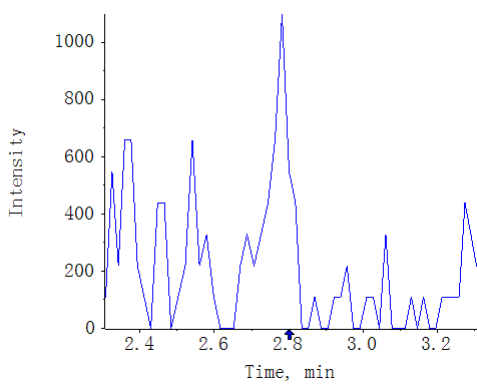

A21233253b\_b  
Scutellarin AREA:N/A S/N:N/A

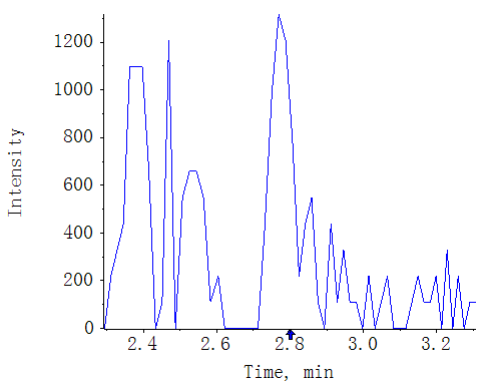

A21233254b\_b  
Scutellarin AREA:N/A S/N:N/A

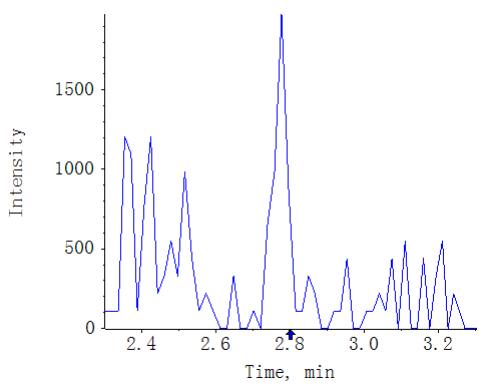

A21233255b\_b  
Scutellarin AREA:N/A S/N:N/A

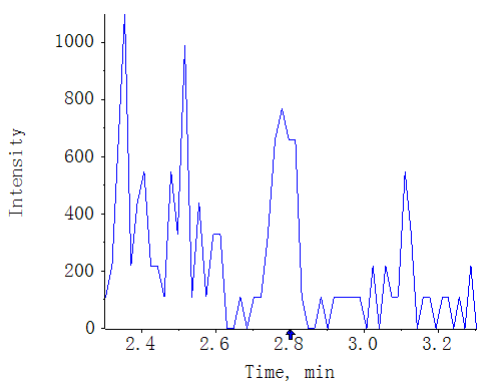

A21233256b\_b  
Scutellarin AREA:N/A S/N:N/A

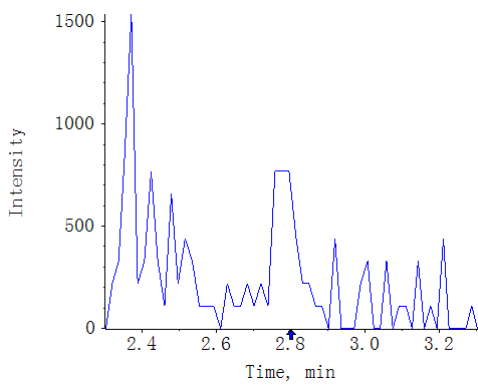

A21233257b\_b  
Scutellarin AREA:N/A S/N:N/A

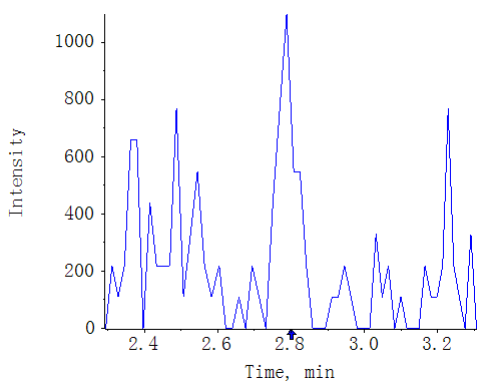

**A21233258b\_b**  
Scutellarin AREA:N/A S/N:N/A

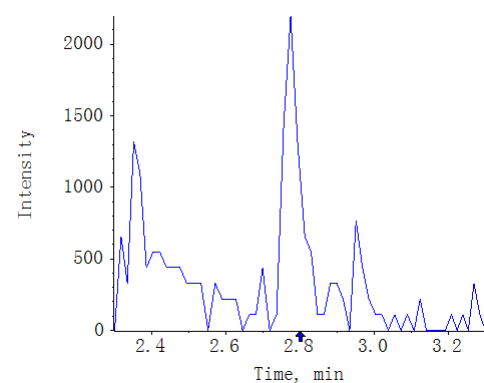

**A21233259b\_b**  
Scutellarin AREA:N/A S/N:N/A

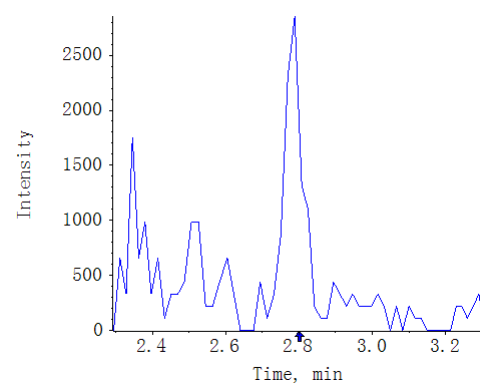

**A21233260b\_b**  
Scutellarin AREA:3.94e4 S/N:55.5

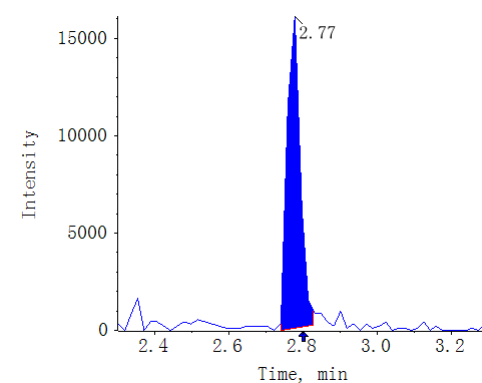

**A21233261b\_b**  
Scutellarin AREA:N/A S/N:N/A

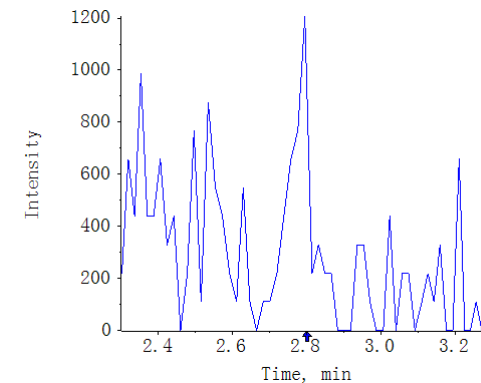

**A21233262b\_b**  
Scutellarin AREA:N/A S/N:N/A

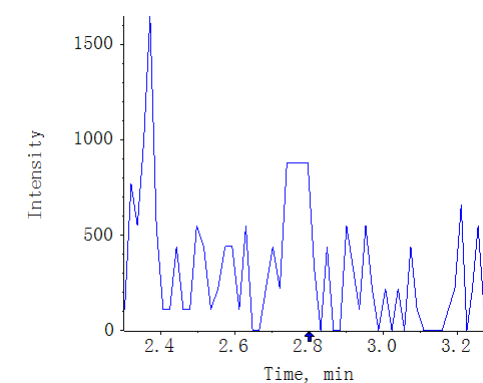

**A21233263b\_b**  
Scutellarin AREA:N/A S/N:N/A

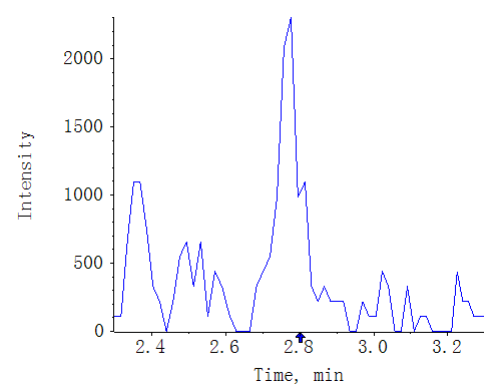

**A21233264b\_b**  
Scutellarin AREA:N/A S/N:N/A

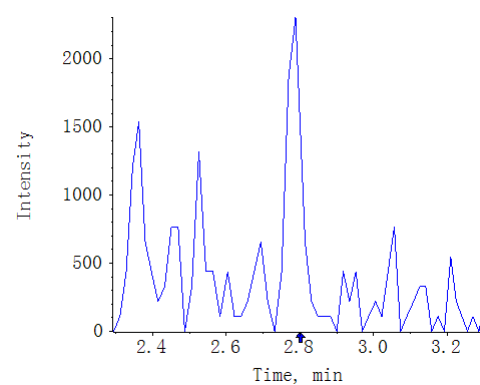

**A21233265b\_b**  
Scutellarin AREA:N/A S/N:N/A

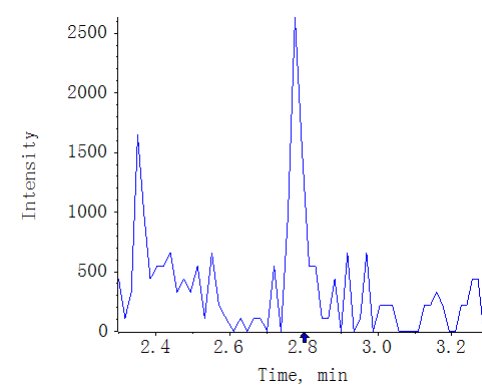

**A21233266b\_b**  
Scutellarin AREA:1.23e4 S/N:15.2

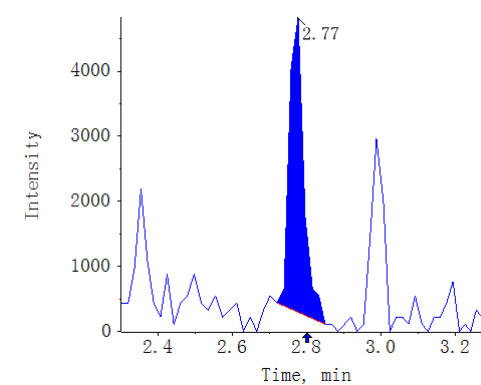

**A21233267b\_b**  
Scutellarin AREA:N/A S/N:N/A

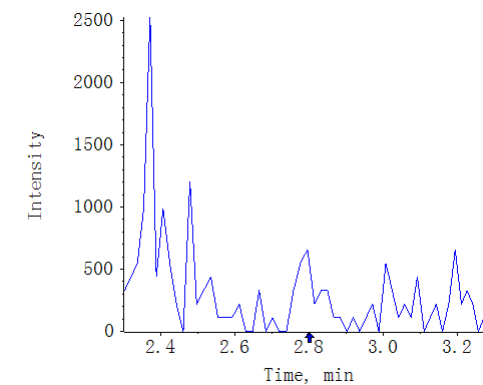

|                    |                                                    |                 |                      |
|--------------------|----------------------------------------------------|-----------------|----------------------|
| Result Table       | MWXS-21-2101D-3_18_WH6500-5_A20-3_V1.0_TY_20211028 | Algorithm Used  | MQ4                  |
| Acquisition Method | Flavonoids_V1.0_WH6500-5_LT_20211025.dam           | Instrument Name | QTRAP 6500+ Low Mass |
| Project            | N/A                                                | Analytes QTY    | 204:16               |

**Compound name: Apigenin-7-glucuronide (445.1 / 269.1)**

| Sample Name           | Sample Type     | Area (cps) | Is Area (cps) | RT (min) | S/N  | Target Conc | Calculated Conc.() |
|-----------------------|-----------------|------------|---------------|----------|------|-------------|--------------------|
| STD_0.5nM             | Standard        | 4.89e3     | N/A           | 3.09     | 10.4 | 0.5000      | 3.990195e-1        |
| STD_1nM               | Standard        | 8.45e3     | N/A           | 3.09     | 19.8 | 1.0000      | 8.320382e-1        |
| STD_5nM               | Standard        | 6.15e4     | N/A           | 3.09     | 46.0 | 5.0000      | 7.282781e0         |
| STD_10nM              | Standard        | 7.94e4     | N/A           | 3.09     | 47.9 | 10.0000     | 9.453568e0         |
| STD_20nM              | Standard        | 1.59e5     | N/A           | 3.08     | 56.8 | 20.0000     | 1.911185e1         |
| STD_50nM              | Standard        | 4.37e5     | N/A           | 3.09     | 67.1 | 50.0000     | 5.291135e1         |
| STD_100nM             | Standard        | 7.77e5     | N/A           | 3.09     | 68.7 | 100.0000    | 9.432869e1         |
| STD_200nM             | Standard        | 1.66e6     | N/A           | 3.09     | 57.8 | 200.0000    | 2.021807e2         |
| STD_500nM             | Standard        | N/A        | N/A           | N/A      | N/A  | 500.0000    | N/A                |
| STD_1000nM            | Standard        | N/A        | N/A           | N/A      | N/A  | 1000.0000   | N/A                |
| STD_2000nM            | Standard        | N/A        | N/A           | N/A      | N/A  | 2000.0000   | N/A                |
| V1.0_MW_RQC1_20211018 | Quality Control | N/A        | N/A           | N/A      | N/A  | 0.0000      | N/A                |
| Blank                 | Unknown         | N/A        | N/A           | N/A      | N/A  | N/A         | N/A                |
| V1.0_MWMS_20211021_1  | Unknown         | 1.40e6     | N/A           | 3.10     | 68.7 | N/A         | 1.705808e2         |
| MWXS212101D3_R1       | Quality Control | 1.43e6     | N/A           | 3.09     | 69.1 | 0.0000      | 1.732445e2         |
| MWXS212101D3_R2       | Quality Control | 1.42e6     | N/A           | 3.10     | 70.9 | 0.0000      | 1.727081e2         |
| MWXS212101D3_R3       | Quality Control | 1.37e6     | N/A           | 3.10     | 66.4 | 0.0000      | 1.669639e2         |
| A21233250b_b          | Unknown         | N/A        | N/A           | N/A      | N/A  | N/A         | N/A                |
| A21233251b_b          | Unknown         | N/A        | N/A           | N/A      | N/A  | N/A         | N/A                |
| A21233252b_b          | Unknown         | N/A        | N/A           | N/A      | N/A  | N/A         | N/A                |
| A21233253b_b          | Unknown         | N/A        | N/A           | N/A      | N/A  | N/A         | N/A                |
| A21233254b_b          | Unknown         | N/A        | N/A           | N/A      | N/A  | N/A         | N/A                |
| A21233255b_b          | Unknown         | N/A        | N/A           | N/A      | N/A  | N/A         | N/A                |
| A21233256b_b          | Unknown         | N/A        | N/A           | N/A      | N/A  | N/A         | N/A                |
| A21233257b_b          | Unknown         | N/A        | N/A           | N/A      | N/A  | N/A         | N/A                |
| A21233258b_b          | Unknown         | N/A        | N/A           | N/A      | N/A  | N/A         | N/A                |
| A21233259b_b          | Unknown         | N/A        | N/A           | N/A      | N/A  | N/A         | N/A                |
| A21233260b_b          | Unknown         | 4.32e3     | N/A           | 3.12     | 9.9  | N/A         | 3.289928e-1        |
| A21233261b_b          | Unknown         | 4.06e3     | N/A           | 3.12     | 9.3  | N/A         | 2.979213e-1        |
| A21233262b_b          | Unknown         | 5.27e3     | N/A           | 3.12     | 6.4  | N/A         | 4.445803e-1        |
| A21233263b_b          | Unknown         | 5.96e3     | N/A           | 3.11     | 9.7  | N/A         | 5.282190e-1        |
| A21233264b_b          | Unknown         | 8.87e3     | N/A           | 3.13     | 12.2 | N/A         | 8.831108e-1        |
| A21233265b_b          | Unknown         | 4.26e3     | N/A           | 3.12     | 10.9 | N/A         | 3.223444e-1        |
| A21233266b_b          | Unknown         | 4.94e3     | N/A           | 3.12     | 11.3 | N/A         | 4.041865e-1        |
| A21233267b_b          | Unknown         | N/A        | N/A           | N/A      | N/A  | N/A         | N/A                |

Compound name: Apigenin-7-glucuronide  
Regression Equation:  $y = 8223.25711x + 1611.52973$  ( $r = 0.99773$ ) (weighting:  $1/x$ )

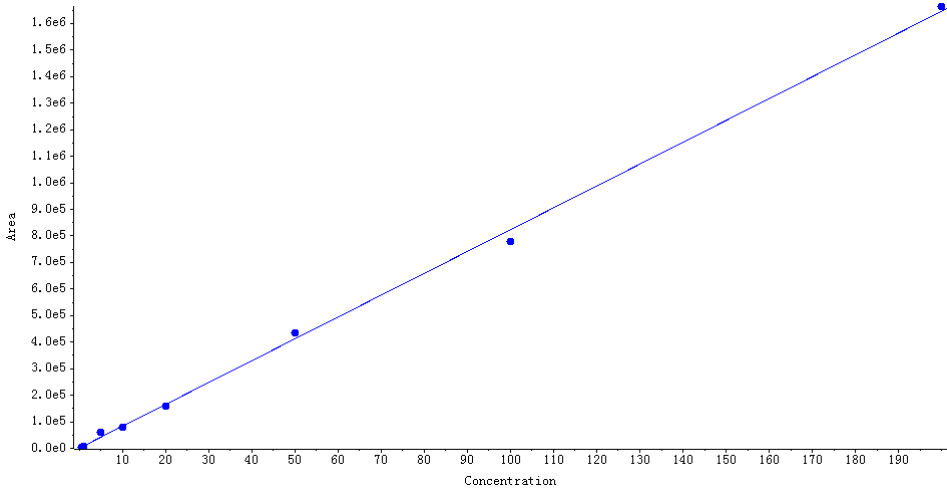

Peak Review

|                        |          |                        |             |                        |          |                        |          |                        |          |
|------------------------|----------|------------------------|-------------|------------------------|----------|------------------------|----------|------------------------|----------|
| Blank                  |          | V1.0_MWMS_20211021_1   |             | A21233250b_b           |          | A21233251b_b           |          | A21233252b_b           |          |
| Apigenin-7-glucuronide | AREA:N/A | Apigenin-7-glucuronide | AREA:1.40e6 | Apigenin-7-glucuronide | AREA:N/A | Apigenin-7-glucuronide | AREA:N/A | Apigenin-7-glucuronide | AREA:N/A |
| S/N:N/A                |          | S/N:68.7               |             | S/N:N/A                |          | S/N:N/A                |          | S/N:N/A                |          |

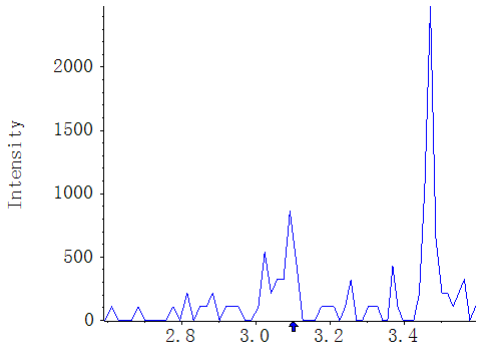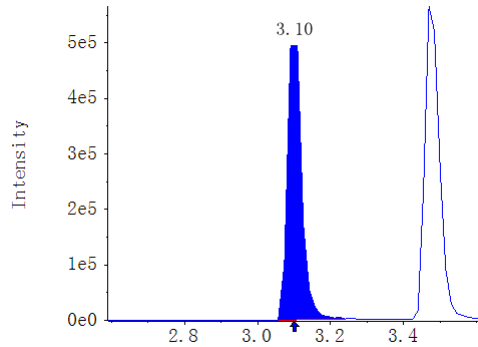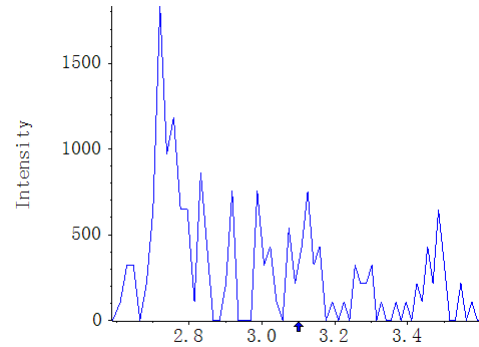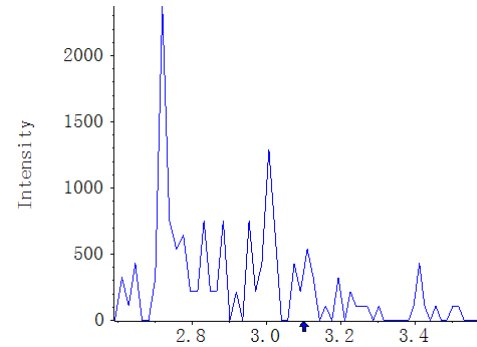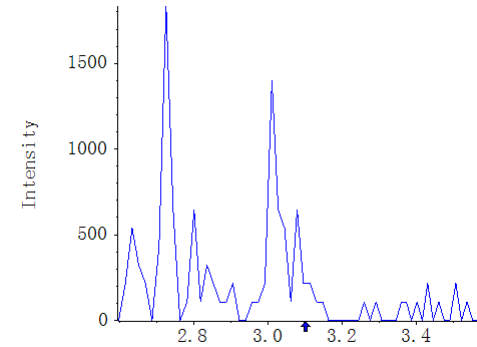

|                        |          |
|------------------------|----------|
| A21233253b_b           |          |
| Apigenin-7-glucuronide | AREA:N/A |
| S/N:N/A                |          |

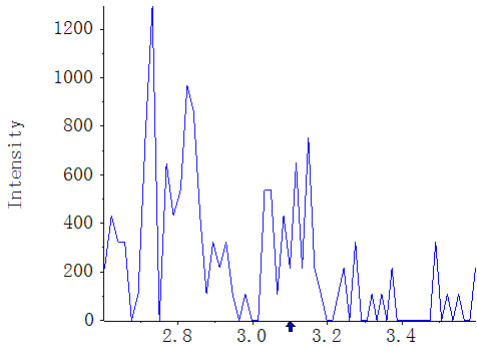

|                        |          |
|------------------------|----------|
| A21233254b_b           |          |
| Apigenin-7-glucuronide | AREA:N/A |
| S/N:N/A                |          |

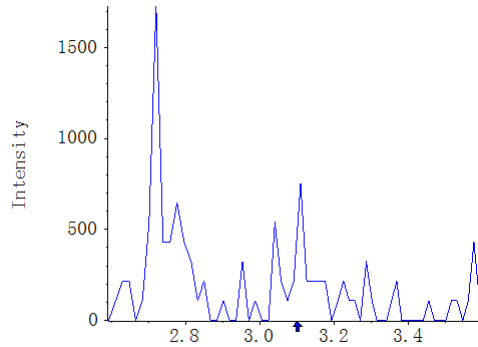

|                        |          |
|------------------------|----------|
| A21233255b_b           |          |
| Apigenin-7-glucuronide | AREA:N/A |
| S/N:N/A                |          |

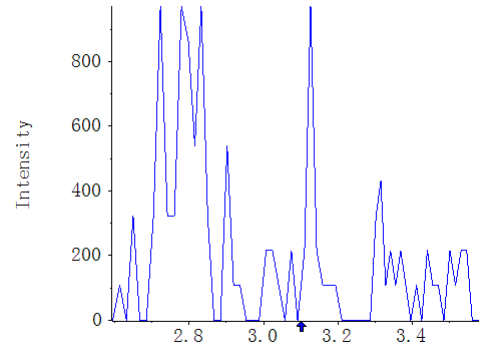

|                        |          |
|------------------------|----------|
| A21233256b_b           |          |
| Apigenin-7-glucuronide | AREA:N/A |
| S/N:N/A                |          |

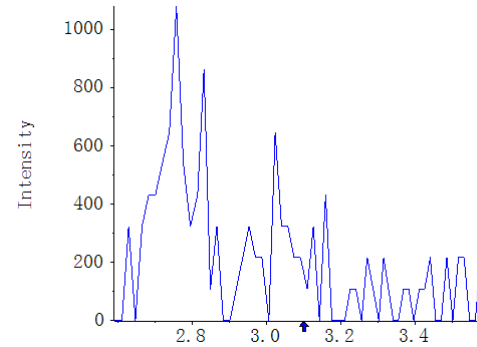

|                        |          |
|------------------------|----------|
| A21233257b_b           |          |
| Apigenin-7-glucuronide | AREA:N/A |
| S/N:N/A                |          |

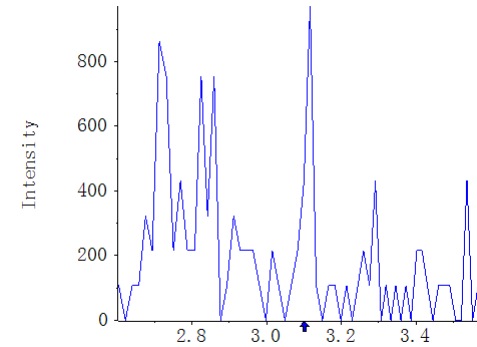

**A21233258b\_b**

Apigenin-7-glucuronide AREA:N/A  
S/N:N/A

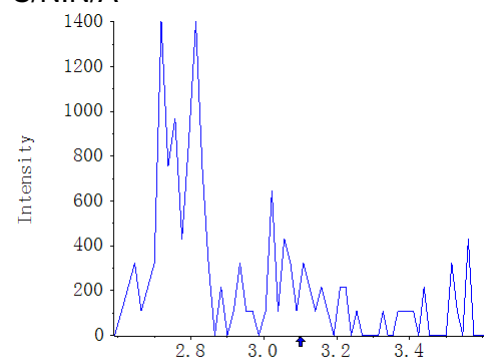

**A21233259b\_b**

Apigenin-7-glucuronide AREA:N/A  
S/N:N/A

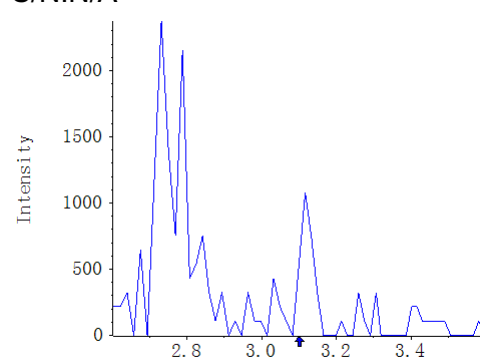

**A21233260b\_b**

Apigenin-7-glucuronide AREA:4.32e3 S/N:9.9

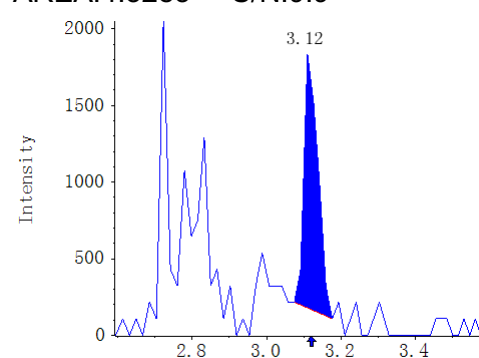

**A21233261b\_b**

Apigenin-7-glucuronide AREA:4.06e3 S/N:9.3

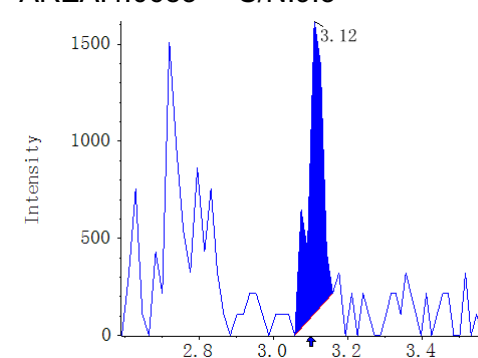

**A21233262b\_b**

Apigenin-7-glucuronide AREA:5.27e3 S/N:6.4

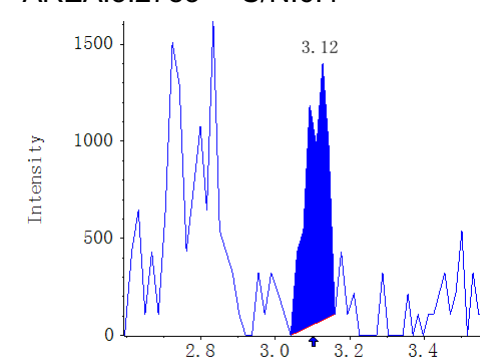

**A21233263b\_b**

Apigenin-7-glucuronide AREA:5.96e3 S/N:9.7

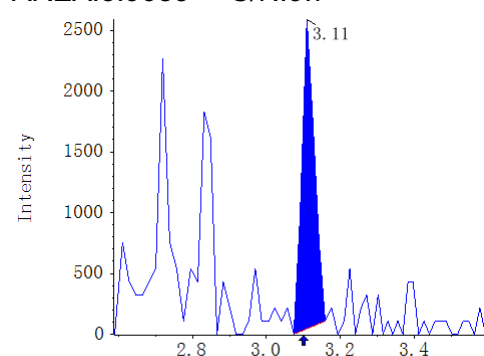

**A21233264b\_b**

Apigenin-7-glucuronide AREA:8.87e3 S/N:12.2

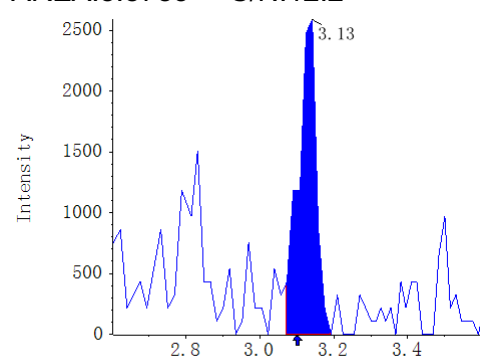

**A21233265b\_b**

Apigenin-7-glucuronide AREA:4.26e3 S/N:10.9

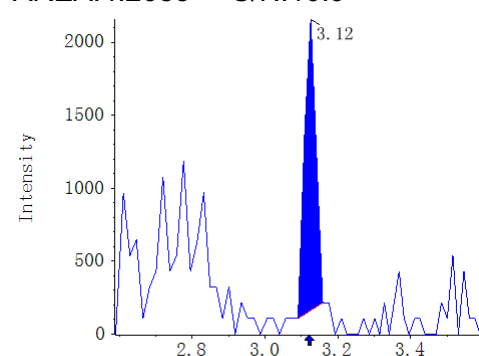

**A21233266b\_b**

Apigenin-7-glucuronide AREA:4.94e3 S/N:11.3

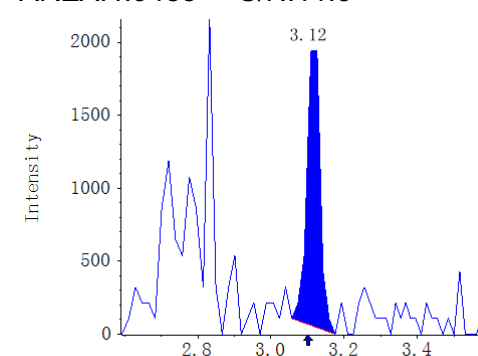

**A21233267b\_b**

Apigenin-7-glucuronide AREA:N/A  
S/N:N/A

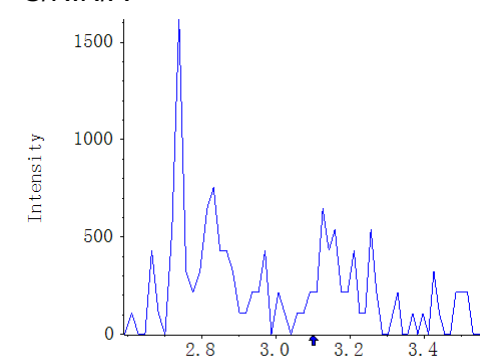

|                    |                                                    |                 |                      |
|--------------------|----------------------------------------------------|-----------------|----------------------|
| Result Table       | MWXS-21-2101D-3_18_WH6500-5_A20-3_V1.0_TY_20211028 | Algorithm Used  | MQ4                  |
| Acquisition Method | Flavonoids_V1.0_WH6500-5_LT_20211025.dam           | Instrument Name | QTRAP 6500+ Low Mass |
| Project            | N/A                                                | Analytes QTY    | 204:38               |

**Compound name: Luteolin (285.0 / 133.0)**

| Sample Name           | Sample Type     | Area (cps) | Is Area (cps) | RT (min) | S/N   | Target Conc | Calculated Conc.() |
|-----------------------|-----------------|------------|---------------|----------|-------|-------------|--------------------|
| STD_0.5nM             | Standard        | 7.32e3     | N/A           | 4.11     | 16.8  | 0.5000      | 5.061871e-1        |
| STD_1nM               | Standard        | 1.11e4     | N/A           | 4.10     | 19.9  | 1.0000      | 8.938487e-1        |
| STD_5nM               | Standard        | 7.09e4     | N/A           | 4.10     | 51.1  | 5.0000      | 7.087917e0         |
| STD_10nM              | Standard        | 9.70e4     | N/A           | 4.10     | 56.7  | 10.0000     | 9.798572e0         |
| STD_20nM              | Standard        | 1.87e5     | N/A           | 4.10     | 58.1  | 20.0000     | 1.914406e1         |
| STD_50nM              | Standard        | 4.79e5     | N/A           | 4.10     | 67.4  | 50.0000     | 4.934395e1         |
| STD_100nM             | Standard        | 9.59e5     | N/A           | 4.11     | 79.1  | 100.0000    | 9.903494e1         |
| STD_200nM             | Standard        | 1.94e6     | N/A           | 4.10     | 79.2  | 200.0000    | 2.006905e2         |
| STD_500nM             | Standard        | N/A        | N/A           | N/A      | N/A   | 500.0000    | N/A                |
| STD_1000nM            | Standard        | N/A        | N/A           | N/A      | N/A   | 1000.0000   | N/A                |
| STD_2000nM            | Standard        | N/A        | N/A           | N/A      | N/A   | 2000.0000   | N/A                |
| V1.0_MW_RQC1_20211018 | Quality Control | 4.09e5     | N/A           | 4.09     | 125.8 | 0.0000      | 4.207151e1         |
| Blank                 | Unknown         | N/A        | N/A           | N/A      | N/A   | N/A         | N/A                |
| V1.0_MWMS_20211021_1  | Unknown         | 1.47e6     | N/A           | 4.11     | 76.4  | N/A         | 1.517010e2         |
| MWXS212101D3_R1       | Quality Control | 1.45e6     | N/A           | 4.11     | 80.3  | 0.0000      | 1.497892e2         |
| MWXS212101D3_R2       | Quality Control | 1.48e6     | N/A           | 4.11     | 77.3  | 0.0000      | 1.527118e2         |
| MWXS212101D3_R3       | Quality Control | 1.46e6     | N/A           | 4.11     | 69.6  | 0.0000      | 1.514360e2         |
| A21233250b_b          | Unknown         | N/A        | N/A           | N/A      | N/A   | N/A         | N/A                |
| A21233251b_b          | Unknown         | N/A        | N/A           | N/A      | N/A   | N/A         | N/A                |
| A21233252b_b          | Unknown         | N/A        | N/A           | N/A      | N/A   | N/A         | N/A                |
| A21233253b_b          | Unknown         | 1.58e4     | N/A           | 4.09     | 11.4  | N/A         | 1.383480e0         |
| A21233254b_b          | Unknown         | 1.06e4     | N/A           | 4.11     | 12.8  | N/A         | 8.458341e-1        |
| A21233255b_b          | Unknown         | 1.80e4     | N/A           | 4.10     | 17.6  | N/A         | 1.609640e0         |
| A21233256b_b          | Unknown         | 2.49e4     | N/A           | 4.11     | 27.9  | N/A         | 2.332485e0         |
| A21233257b_b          | Unknown         | 3.11e4     | N/A           | 4.12     | 37.3  | N/A         | 2.965846e0         |
| A21233258b_b          | Unknown         | 4.57e3     | N/A           | 4.11     | 8.7   | N/A         | 2.221947e-1        |
| A21233259b_b          | Unknown         | N/A        | N/A           | N/A      | N/A   | N/A         | N/A                |
| A21233260b_b          | Unknown         | N/A        | N/A           | N/A      | N/A   | N/A         | N/A                |
| A21233261b_b          | Unknown         | N/A        | N/A           | N/A      | N/A   | N/A         | N/A                |
| A21233262b_b          | Unknown         | N/A        | N/A           | N/A      | N/A   | N/A         | N/A                |
| A21233263b_b          | Unknown         | 3.24e4     | N/A           | 4.10     | 27.5  | N/A         | 3.104900e0         |
| A21233264b_b          | Unknown         | 3.19e4     | N/A           | 4.11     | 22.2  | N/A         | 3.049338e0         |
| A21233265b_b          | Unknown         | 5.70e4     | N/A           | 4.11     | 37.2  | N/A         | 5.653376e0         |
| A21233266b_b          | Unknown         | 2.44e4     | N/A           | 4.10     | 29.5  | N/A         | 2.280720e0         |
| A21233267b_b          | Unknown         | 5.92e4     | N/A           | 4.12     | 46.0  | N/A         | 5.880323e0         |

Compound name: Luteolin  
Regression Equation:  $y = 9654.82488x + 2428.72465$  ( $r = 0.99990$ ) (weighting: None)

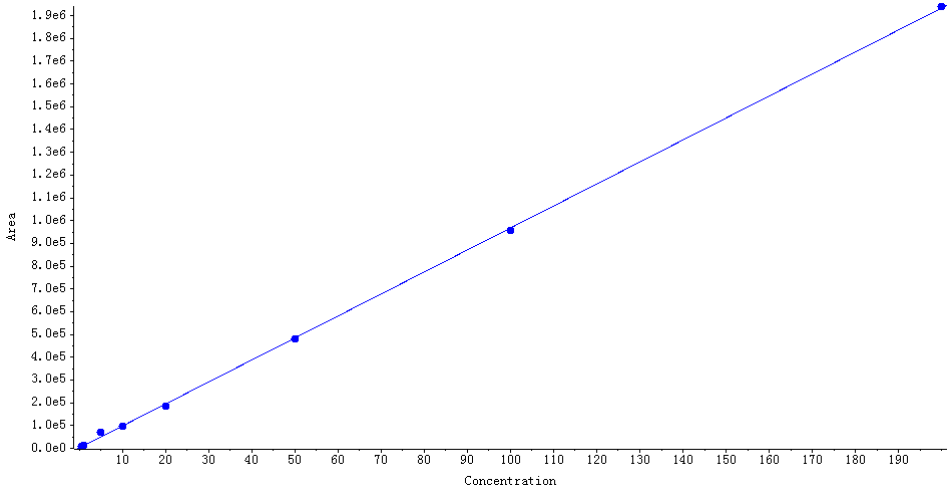

Peak Review

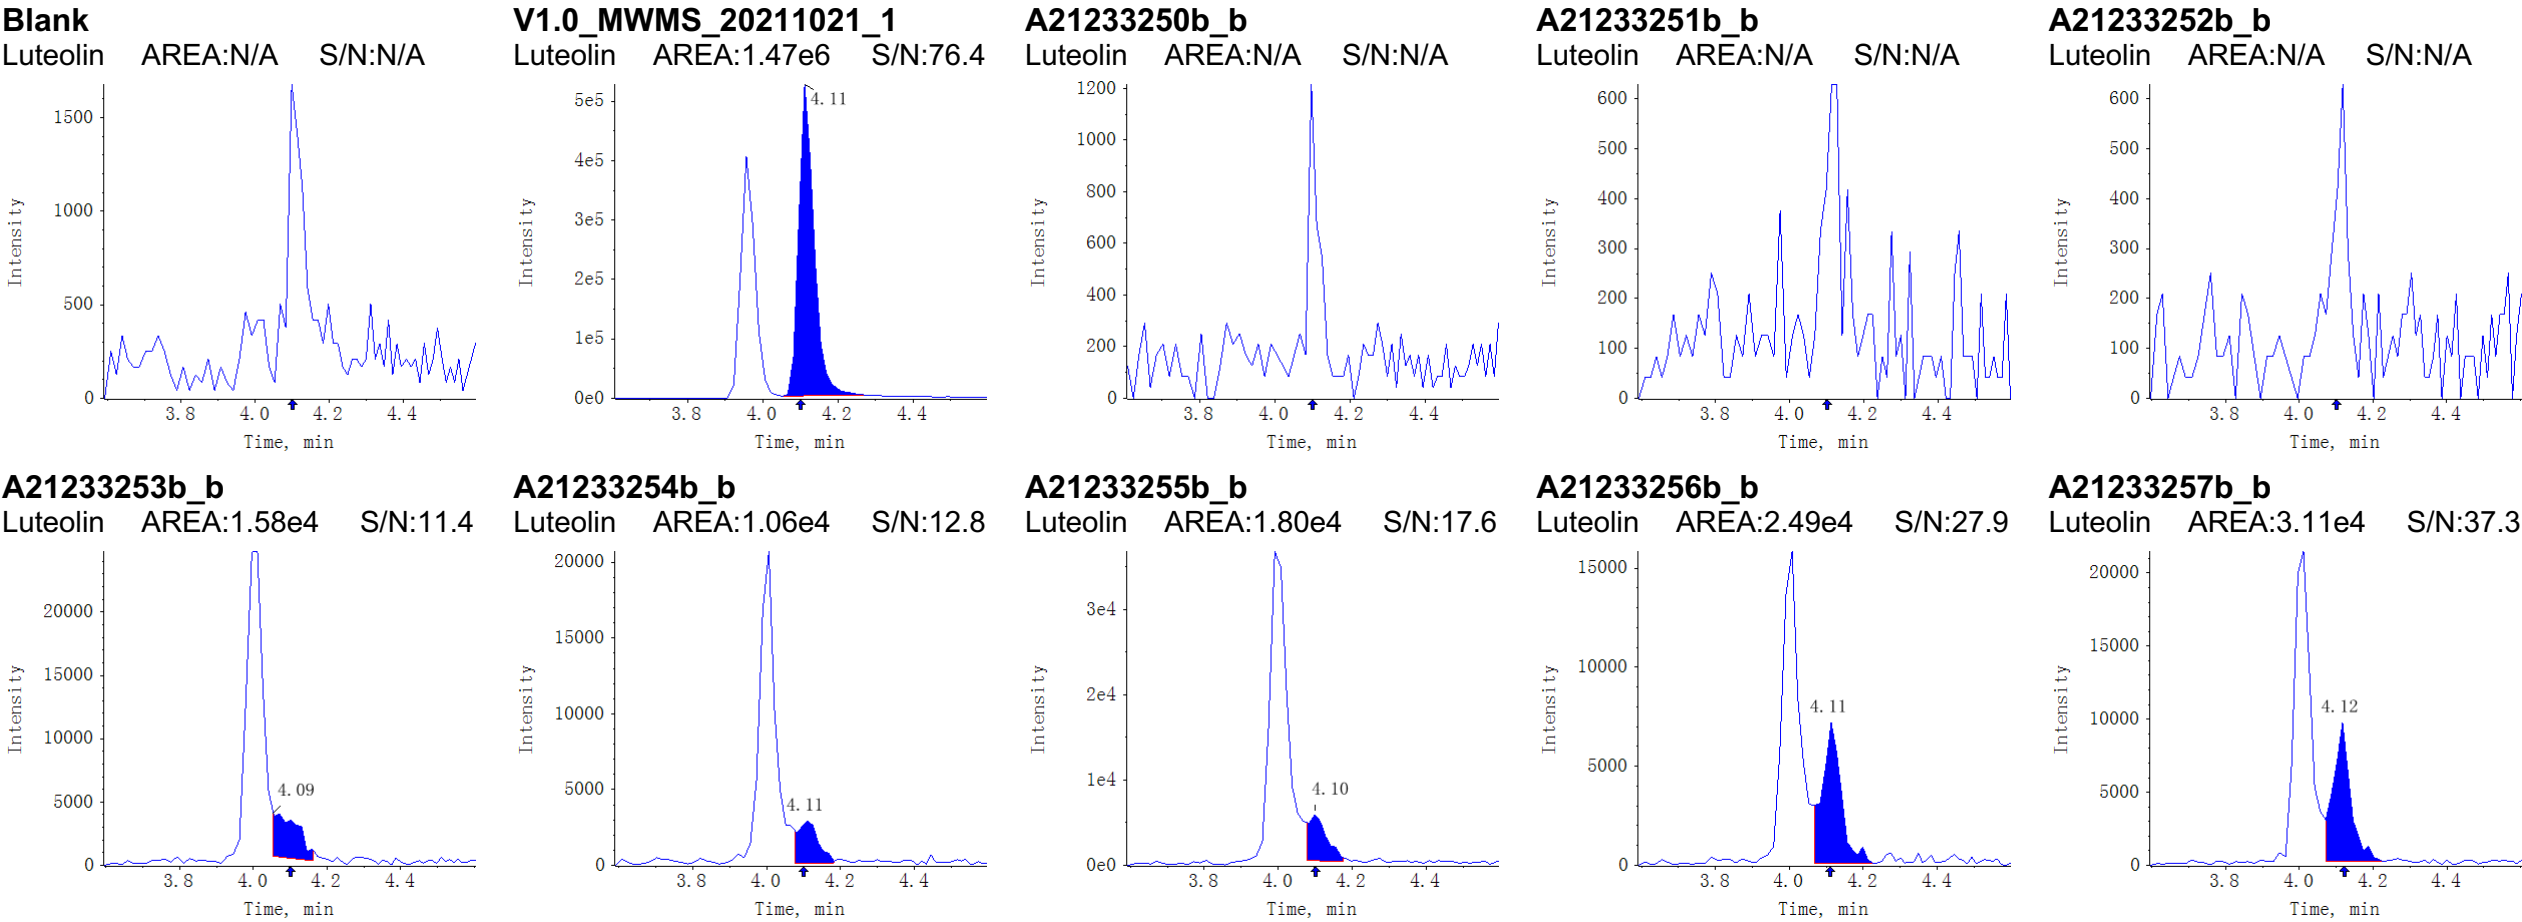

**A21233258b\_b**

Luteolin AREA:4.57e3 S/N:8.7

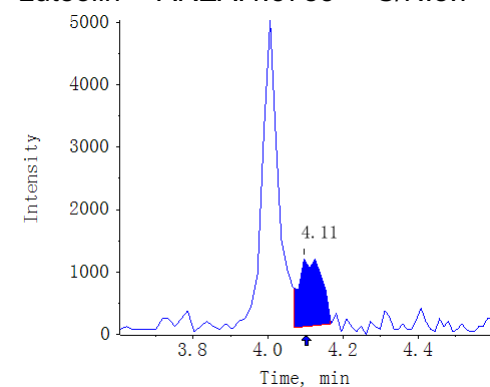

**A21233259b\_b**

Luteolin AREA:N/A S/N:N/A

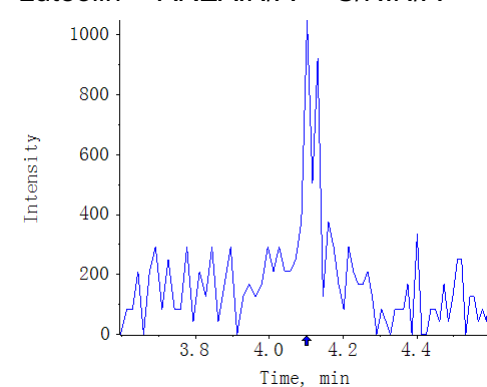

**A21233260b\_b**

Luteolin AREA:N/A S/N:N/A

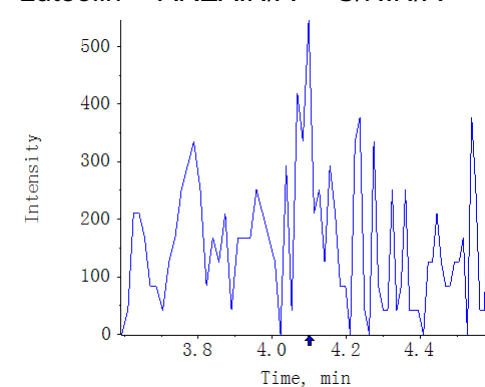

**A21233261b\_b**

Luteolin AREA:N/A S/N:N/A

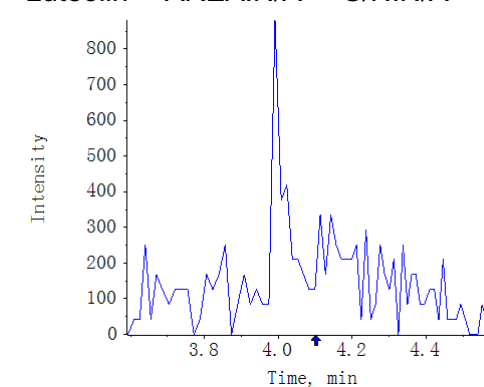

**A21233262b\_b**

Luteolin AREA:N/A S/N:N/A

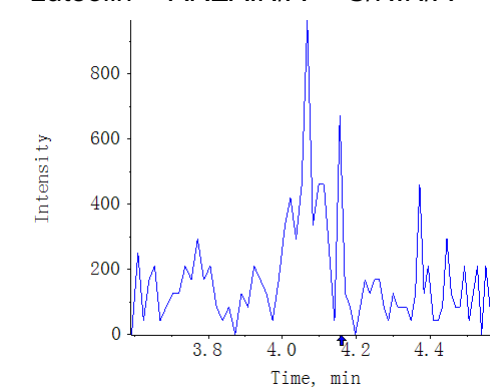

**A21233263b\_b**

Luteolin AREA:3.24e4 S/N:27.5

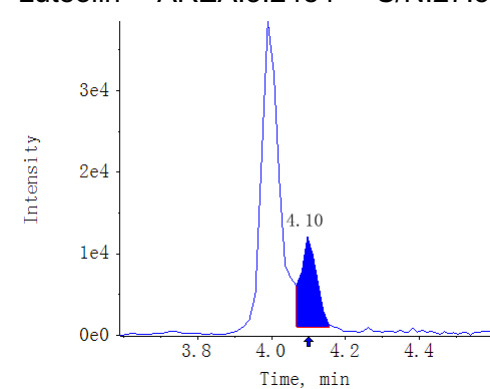

**A21233264b\_b**

Luteolin AREA:3.19e4 S/N:22.2

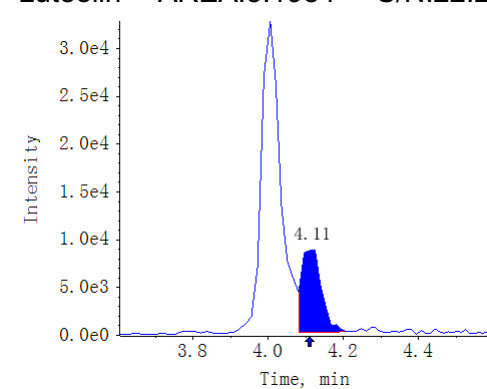

**A21233265b\_b**

Luteolin AREA:5.70e4 S/N:37.2

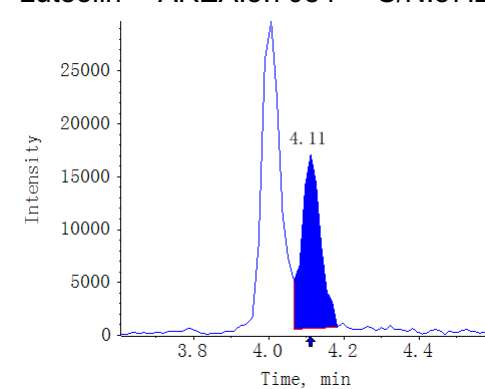

**A21233266b\_b**

Luteolin AREA:2.44e4 S/N:29.5

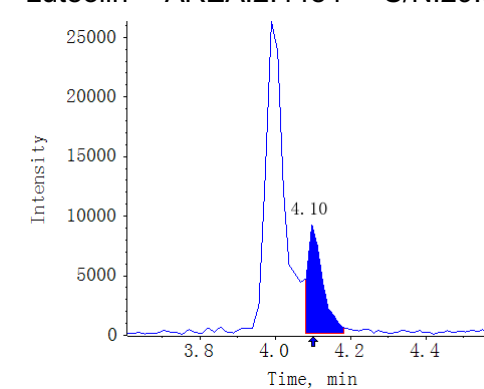

**A21233267b\_b**

Luteolin AREA:5.92e4 S/N:46.0

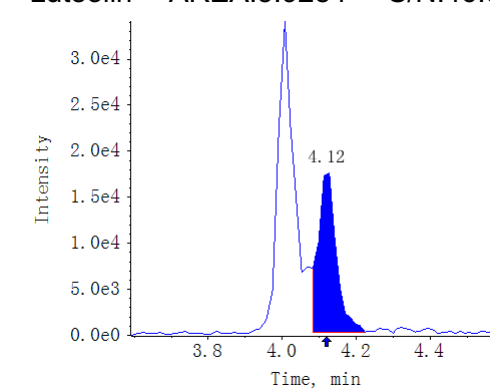

|                    |                                                    |                 |                      |
|--------------------|----------------------------------------------------|-----------------|----------------------|
| Result Table       | MWXS-21-2101D-3_18_WH6500-5_A20-3_V1.0_TY_20211028 | Algorithm Used  | MQ4                  |
| Acquisition Method | Flavonoids_V1.0_WH6500-5_LT_20211025.dam           | Instrument Name | QTRAP 6500+ Low Mass |
| Project            | N/A                                                | Analytes QTY    | 204:14               |

**Compound name: Quercetin (301.1 / 151.0)**

| Sample Name           | Sample Type     | Area (cps) | Is Area (cps) | RT (min) | S/N   | Target Conc | Calculated Conc.() |
|-----------------------|-----------------|------------|---------------|----------|-------|-------------|--------------------|
| STD_0.5nM             | Standard        | 6.09e3     | N/A           | 4.14     | 17.8  | 0.5000      | 4.936760e-1        |
| STD_1nM               | Standard        | 8.65e3     | N/A           | 4.13     | 23.6  | 1.0000      | 7.674545e-1        |
| STD_5nM               | Standard        | 6.19e4     | N/A           | 4.14     | 86.7  | 5.0000      | 6.450162e0         |
| STD_10nM              | Standard        | 9.64e4     | N/A           | 4.14     | 121.7 | 10.0000     | 1.013579e1         |
| STD_20nM              | Standard        | 1.79e5     | N/A           | 4.13     | 141.6 | 20.0000     | 1.896701e1         |
| STD_50nM              | Standard        | 4.68e5     | N/A           | 4.14     | 177.9 | 50.0000     | 4.980782e1         |
| STD_100nM             | Standard        | 9.33e5     | N/A           | 4.15     | 167.9 | 100.0000    | 9.953699e1         |
| STD_200nM             | Standard        | 1.88e6     | N/A           | 4.13     | 209.6 | 200.0000    | 2.003411e2         |
| STD_500nM             | Standard        | N/A        | N/A           | N/A      | N/A   | 500.0000    | N/A                |
| STD_1000nM            | Standard        | N/A        | N/A           | N/A      | N/A   | 1000.0000   | N/A                |
| STD_2000nM            | Standard        | N/A        | N/A           | N/A      | N/A   | 2000.0000   | N/A                |
| V1.0_MW_RQC1_20211018 | Quality Control | 1.21e4     | N/A           | 4.13     | 19.5  | 0.0000      | 1.140130e0         |
| Blank                 | Unknown         | N/A        | N/A           | N/A      | N/A   | N/A         | N/A                |
| V1.0_MWMS_20211021_1  | Unknown         | 1.76e6     | N/A           | 4.15     | 189.8 | N/A         | 1.872914e2         |
| MWXS212101D3_R1       | Quality Control | 1.71e6     | N/A           | 4.15     | 192.9 | 0.0000      | 1.826029e2         |
| MWXS212101D3_R2       | Quality Control | 1.73e6     | N/A           | 4.15     | 171.1 | 0.0000      | 1.844329e2         |
| MWXS212101D3_R3       | Quality Control | 1.71e6     | N/A           | 4.15     | 187.3 | 0.0000      | 1.827556e2         |
| A21233250b_b          | Unknown         | N/A        | N/A           | N/A      | N/A   | N/A         | N/A                |
| A21233251b_b          | Unknown         | N/A        | N/A           | N/A      | N/A   | N/A         | N/A                |
| A21233252b_b          | Unknown         | N/A        | N/A           | N/A      | N/A   | N/A         | N/A                |
| A21233253b_b          | Unknown         | 1.48e5     | N/A           | 4.16     | 116.6 | N/A         | 1.569020e1         |
| A21233254b_b          | Unknown         | 1.25e5     | N/A           | 4.15     | 109.1 | N/A         | 1.315622e1         |
| A21233255b_b          | Unknown         | 2.17e5     | N/A           | 4.15     | 118.8 | N/A         | 2.304047e1         |
| A21233256b_b          | Unknown         | 1.25e5     | N/A           | 4.15     | 112.6 | N/A         | 1.317362e1         |
| A21233257b_b          | Unknown         | 1.67e5     | N/A           | 4.16     | 111.5 | N/A         | 1.770215e1         |
| A21233258b_b          | Unknown         | 4.49e4     | N/A           | 4.16     | 72.6  | N/A         | 4.643420e0         |
| A21233259b_b          | Unknown         | N/A        | N/A           | N/A      | N/A   | N/A         | N/A                |
| A21233260b_b          | Unknown         | N/A        | N/A           | N/A      | N/A   | N/A         | N/A                |
| A21233261b_b          | Unknown         | N/A        | N/A           | N/A      | N/A   | N/A         | N/A                |
| A21233262b_b          | Unknown         | N/A        | N/A           | N/A      | N/A   | N/A         | N/A                |
| A21233263b_b          | Unknown         | 1.46e5     | N/A           | 4.14     | 129.5 | N/A         | 1.545775e1         |
| A21233264b_b          | Unknown         | 1.80e5     | N/A           | 4.16     | 106.5 | N/A         | 1.902245e1         |
| A21233265b_b          | Unknown         | 1.56e5     | N/A           | 4.15     | 120.7 | N/A         | 1.655200e1         |
| A21233266b_b          | Unknown         | 1.15e5     | N/A           | 4.15     | 115.5 | N/A         | 1.215282e1         |
| A21233267b_b          | Unknown         | 7.51e4     | N/A           | 4.16     | 79.4  | N/A         | 7.860888e0         |

Compound name: Quercetin

Regression Equation:  $y = 9363.61356x + 1467.92020$  ( $r = 0.99928$ ) (weighting:  $1/x$ )

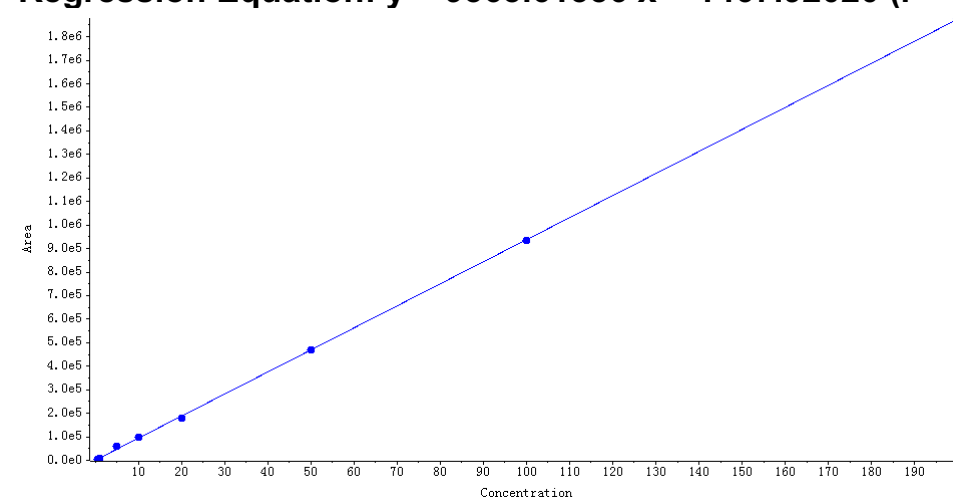

### Peak Review

Blank

Quercetin AREA:N/A S/N:N/A

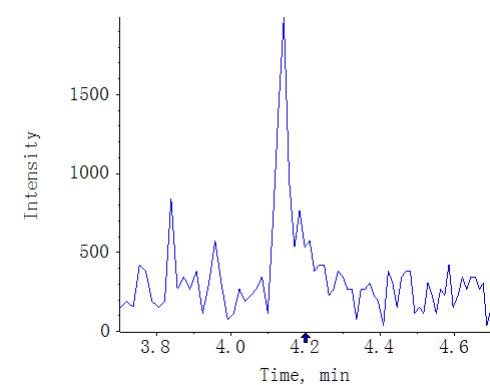

V1.0\_MWMS\_20211021\_1

Quercetin AREA:1.76e6  
S/N:189.8

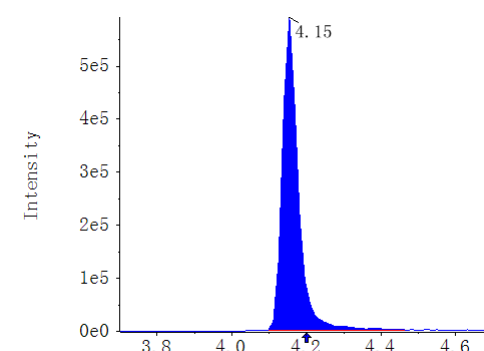

A21233250b\_b

Quercetin AREA:N/A S/N:N/A

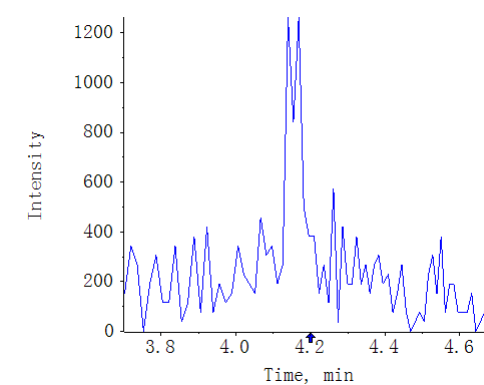

A21233251b\_b

Quercetin AREA:N/A S/N:N/A

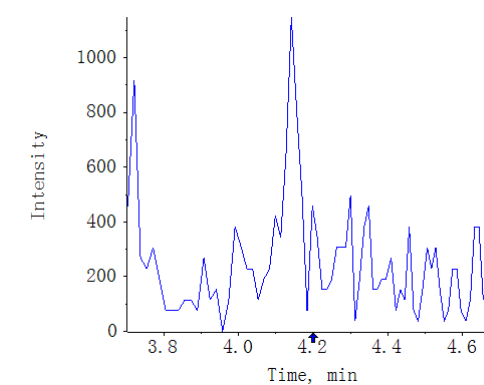

A21233252b\_b

Quercetin AREA:N/A S/N:N/A

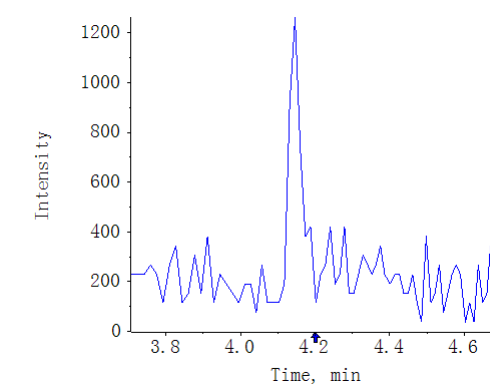

A21233253b\_b

Quercetin AREA:1.48e5  
S/N:116.6

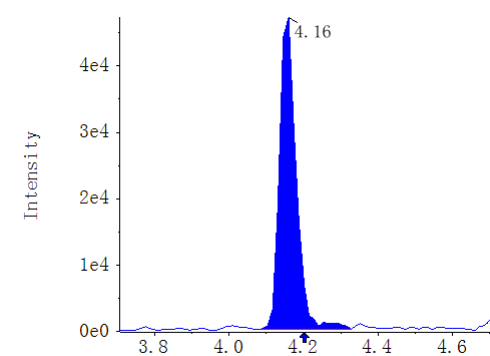

A21233254b\_b

Quercetin AREA:1.25e5  
S/N:109.1

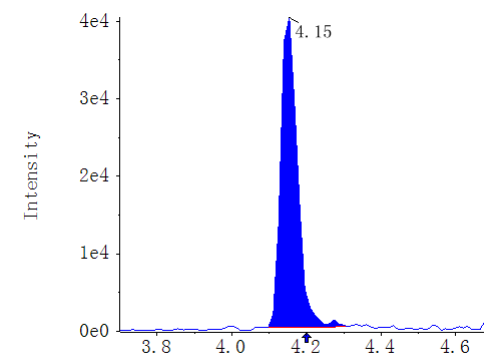

A21233255b\_b

Quercetin AREA:2.17e5  
S/N:118.8

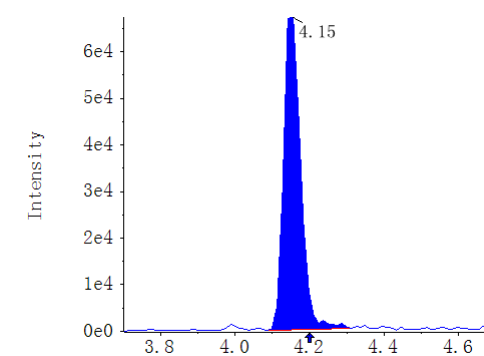

A21233256b\_b

Quercetin AREA:1.25e5  
S/N:112.6

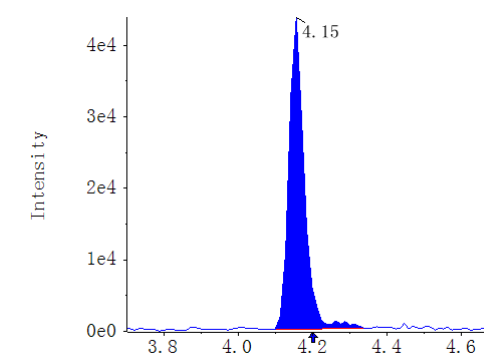

A21233257b\_b

Quercetin AREA:1.67e5  
S/N:111.5

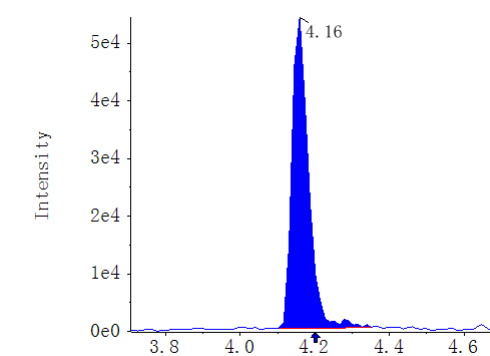

**A21233258b\_b**

Quercetin AREA:4.49e4 S/N:72.6

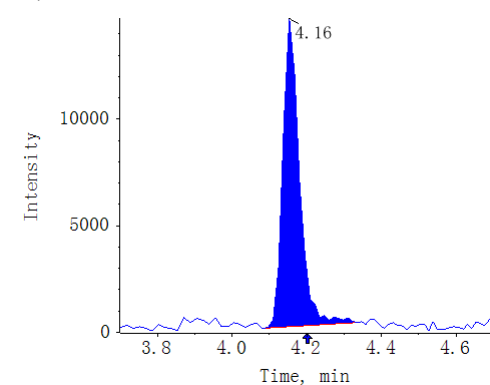

**A21233259b\_b**

Quercetin AREA:N/A S/N:N/A

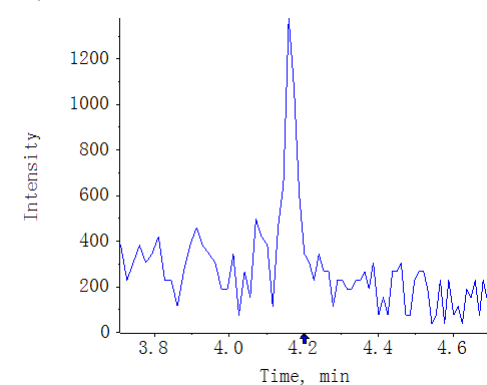

**A21233260b\_b**

Quercetin AREA:N/A S/N:N/A

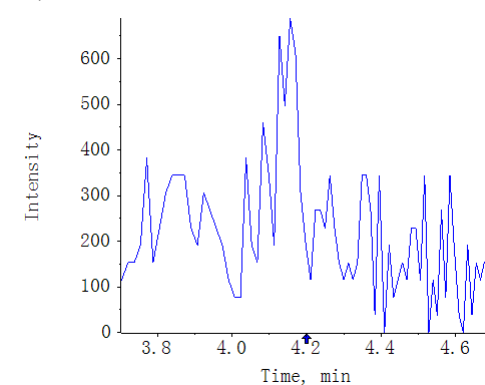

**A21233261b\_b**

Quercetin AREA:N/A S/N:N/A

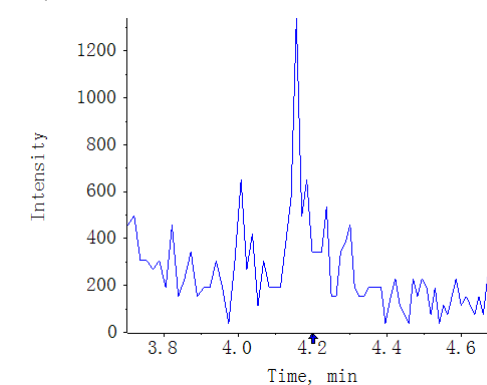

**A21233262b\_b**

Quercetin AREA:N/A S/N:N/A

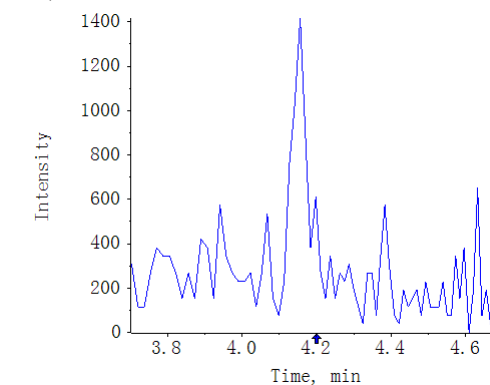

**A21233263b\_b**

Quercetin AREA:1.46e5 S/N:129.5

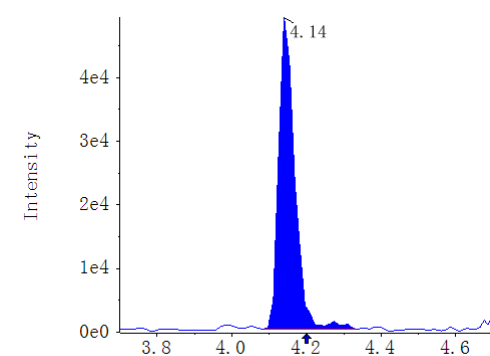

**A21233264b\_b**

Quercetin AREA:1.80e5 S/N:106.5

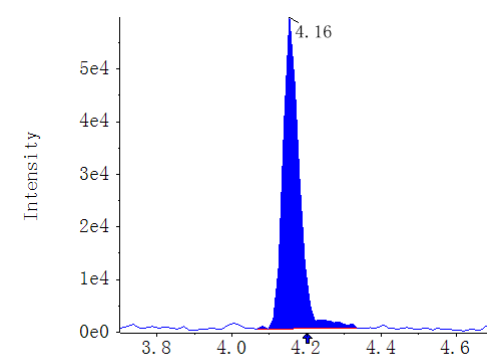

**A21233265b\_b**

Quercetin AREA:1.56e5 S/N:120.7

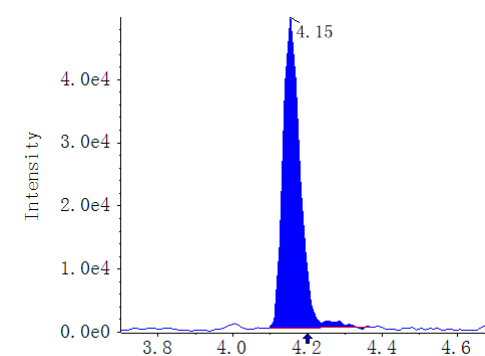

**A21233266b\_b**

Quercetin AREA:1.15e5 S/N:115.5

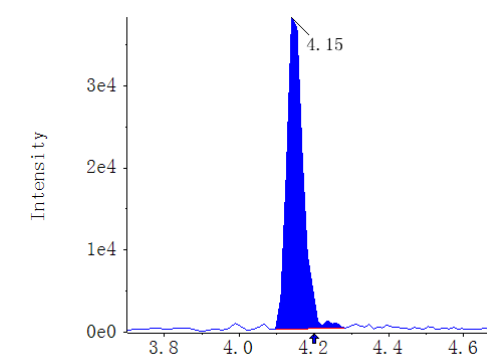

**A21233267b\_b**

Quercetin AREA:7.51e4 S/N:79.4

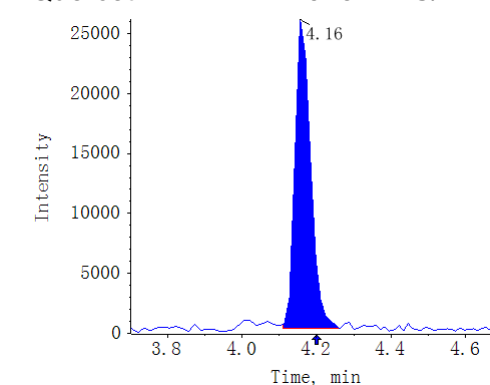

|                    |                                                    |                 |                      |
|--------------------|----------------------------------------------------|-----------------|----------------------|
| Result Table       | MWXS-21-2101D-3_18_WH6500-5_A20-3_V1.0_TY_20211028 | Algorithm Used  | MQ4                  |
| Acquisition Method | Flavonoids_V1.0_WH6500-5_LT_20211025.dam           | Instrument Name | QTRAP 6500+ Low Mass |
| Project            | N/A                                                | Analytes QTY    | 204:1                |

**Compound name: Miquelianin (477.1 / 301.0)**

| Sample Name           | Sample Type     | Area (cps) | Is Area (cps) | RT (min) | S/N   | Target Conc | Calculated Conc.() |
|-----------------------|-----------------|------------|---------------|----------|-------|-------------|--------------------|
| STD_0.5nM             | Standard        | 7.18e3     | N/A           | 2.76     | 28.6  | 0.5000      | 6.226589e-1        |
| STD_1nM               | Standard        | 8.44e3     | N/A           | 2.75     | 22.3  | 1.0000      | 7.504903e-1        |
| STD_5nM               | Standard        | 5.86e4     | N/A           | 2.75     | 135.6 | 5.0000      | 5.846787e0         |
| STD_10nM              | Standard        | 9.39e4     | N/A           | 2.75     | 180.0 | 10.0000     | 9.428521e0         |
| STD_20nM              | Standard        | 1.78e5     | N/A           | 2.75     | 184.4 | 20.0000     | 1.796654e1         |
| STD_50nM              | Standard        | 4.94e5     | N/A           | 2.76     | 184.7 | 50.0000     | 5.009470e1         |
| STD_100nM             | Standard        | 9.52e5     | N/A           | 2.76     | 195.8 | 100.0000    | 9.656202e1         |
| STD_200nM             | Standard        | 2.02e6     | N/A           | 2.75     | 222.5 | 200.0000    | 2.052283e2         |
| STD_500nM             | Standard        | N/A        | N/A           | N/A      | N/A   | 500.0000    | N/A                |
| STD_1000nM            | Standard        | N/A        | N/A           | N/A      | N/A   | 1000.0000   | N/A                |
| STD_2000nM            | Standard        | N/A        | N/A           | N/A      | N/A   | 2000.0000   | N/A                |
| V1.0_MW_RQC1_20211018 | Quality Control | N/A        | N/A           | N/A      | N/A   | 0.0000      | N/A                |
| Blank                 | Unknown         | N/A        | N/A           | N/A      | N/A   | N/A         | N/A                |
| V1.0_MWMS_20211021_1  | Unknown         | 1.67e6     | N/A           | 2.76     | 223.5 | N/A         | 1.690883e2         |
| MWXS212101D3_R1       | Quality Control | 1.74e6     | N/A           | 2.76     | 255.1 | 0.0000      | 1.768292e2         |
| MWXS212101D3_R2       | Quality Control | 1.67e6     | N/A           | 2.76     | 234.1 | 0.0000      | 1.693909e2         |
| MWXS212101D3_R3       | Quality Control | 1.66e6     | N/A           | 2.76     | 245.1 | 0.0000      | 1.684236e2         |
| A21233250b_b          | Unknown         | 9.48e3     | N/A           | 2.75     | 8.3   | N/A         | 8.560279e-1        |
| A21233251b_b          | Unknown         | 1.06e4     | N/A           | 2.75     | 14.9  | N/A         | 9.714955e-1        |
| A21233252b_b          | Unknown         | 1.16e4     | N/A           | 2.75     | 12.7  | N/A         | 1.071944e0         |
| A21233253b_b          | Unknown         | 1.64e4     | N/A           | 2.76     | 16.8  | N/A         | 1.564147e0         |
| A21233254b_b          | Unknown         | 1.26e4     | N/A           | 2.75     | 17.8  | N/A         | 1.171416e0         |
| A21233255b_b          | Unknown         | 1.73e4     | N/A           | 2.76     | 16.3  | N/A         | 1.650977e0         |
| A21233256b_b          | Unknown         | 1.70e4     | N/A           | 2.76     | 25.6  | N/A         | 1.614991e0         |
| A21233257b_b          | Unknown         | 1.48e4     | N/A           | 2.76     | 14.7  | N/A         | 1.399024e0         |
| A21233258b_b          | Unknown         | 2.35e4     | N/A           | 2.76     | 25.2  | N/A         | 2.278555e0         |
| A21233259b_b          | Unknown         | 8.97e3     | N/A           | 2.76     | 13.5  | N/A         | 8.044643e-1        |
| A21233260b_b          | Unknown         | 1.53e4     | N/A           | 2.76     | 18.9  | N/A         | 1.451240e0         |
| A21233261b_b          | Unknown         | 1.15e4     | N/A           | 2.76     | 14.3  | N/A         | 1.057247e0         |
| A21233262b_b          | Unknown         | 1.14e4     | N/A           | 2.76     | 12.0  | N/A         | 1.052575e0         |
| A21233263b_b          | Unknown         | 1.31e4     | N/A           | 2.75     | 13.8  | N/A         | 1.219934e0         |
| A21233264b_b          | Unknown         | 1.37e4     | N/A           | 2.75     | 15.4  | N/A         | 1.285843e0         |
| A21233265b_b          | Unknown         | 7.78e3     | N/A           | 2.76     | 14.5  | N/A         | 6.841462e-1        |
| A21233266b_b          | Unknown         | 1.33e5     | N/A           | 2.75     | 81.3  | N/A         | 1.338100e1         |
| A21233267b_b          | Unknown         | 8.58e3     | N/A           | 2.76     | 12.3  | N/A         | 7.647283e-1        |

Compound name: Miquelianin

Regression Equation:  $y = 9846.71313x + 1047.96191$  ( $r = 0.99901$ ) (weighting:  $1/x$ )

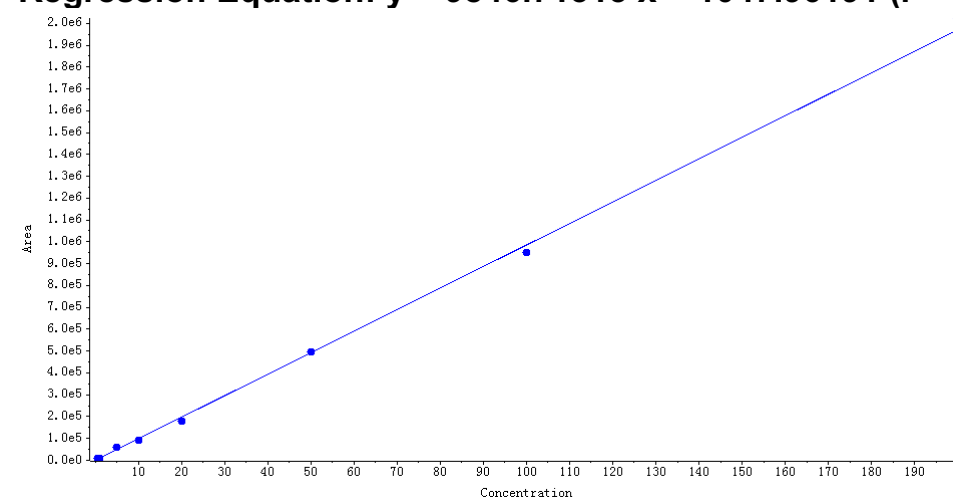

## Peak Review

Blank

Miquelianin AREA:N/A S/N:N/A

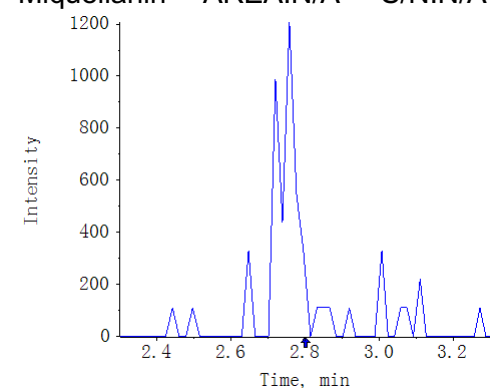

V1.0\_MWMS\_20211021\_1

Miquelianin AREA:1.67e6  
S/N:223.5

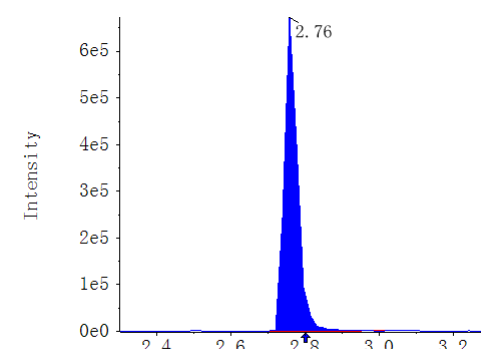

A21233250b\_b

Miquelianin AREA:9.48e3 S/N:8.3  
Miquelianin AREA:1.06e4 S/N:14.9

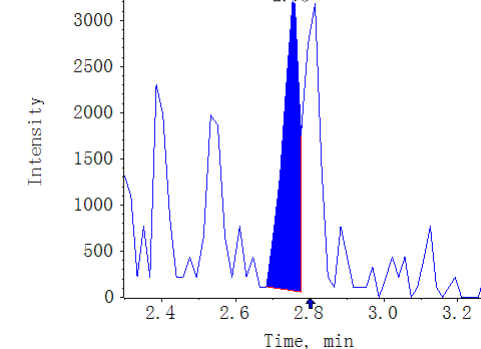

A21233251b\_b

Miquelianin AREA:1.06e4 S/N:14.9

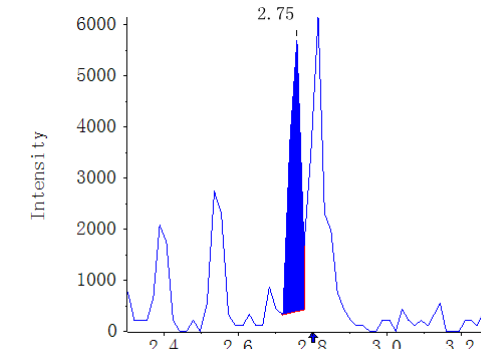

A21233252b\_b

Miquelianin AREA:1.16e4 S/N:12.7

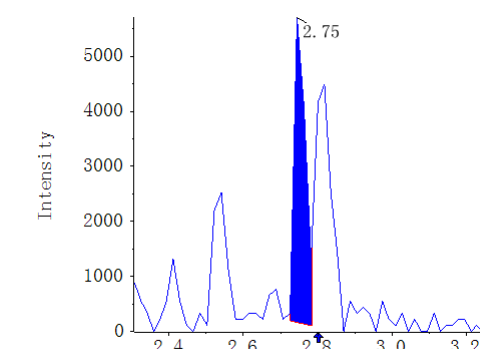

A21233253b\_b

Miquelianin AREA:1.64e4 S/N:16.8

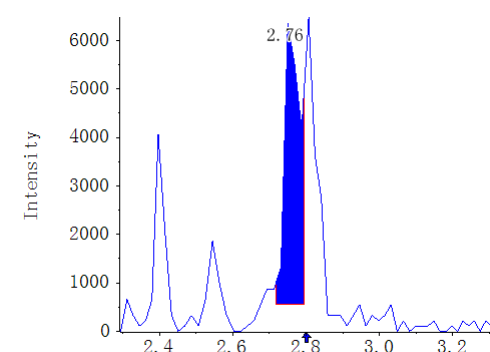

A21233254b\_b

Miquelianin AREA:1.26e4 S/N:17.8

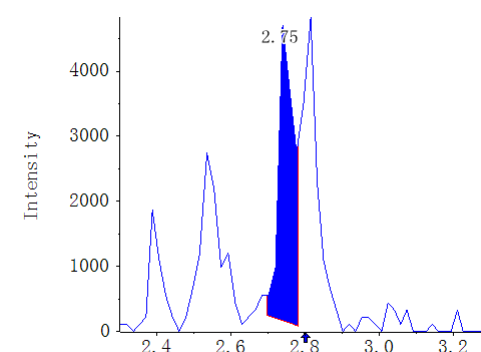

A21233255b\_b

Miquelianin AREA:1.73e4 S/N:16.3

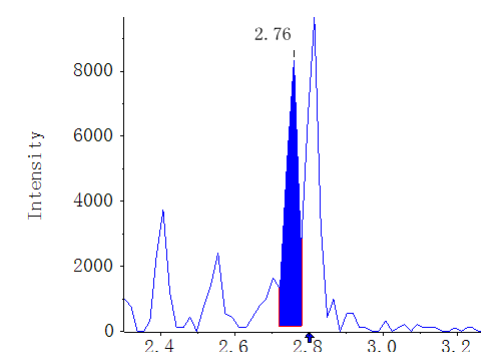

A21233256b\_b

Miquelianin AREA:1.70e4 S/N:25.6

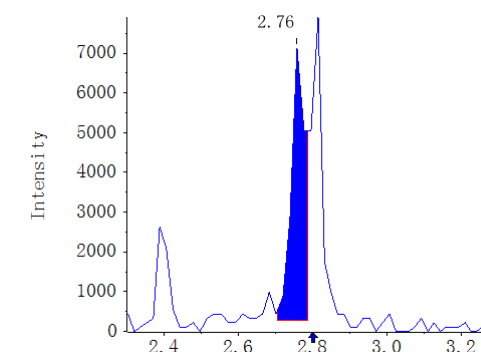

A21233257b\_b

Miquelianin AREA:1.48e4 S/N:14.7

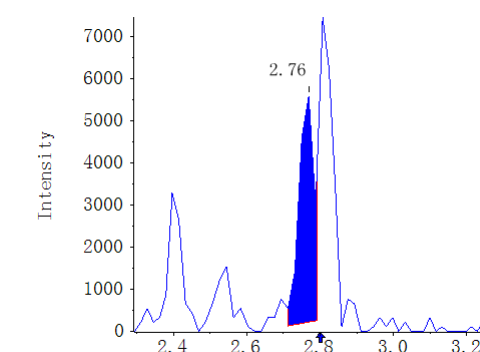

**A21233258b\_b**  
Miquelianin AREA:2.35e4  
S/N:25.2

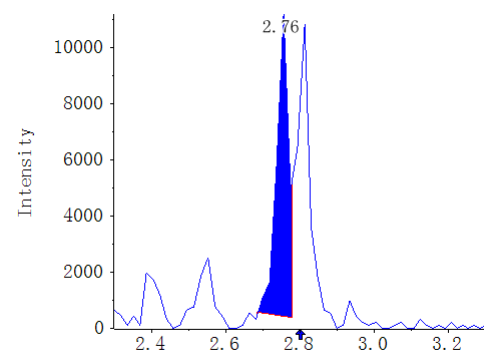

**A21233259b\_b**  
Miquelianin AREA:8.97e3  
S/N:13.5

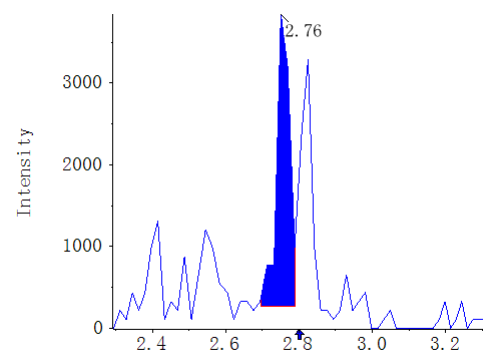

**A21233260b\_b**  
Miquelianin AREA:1.53e4  
S/N:18.9

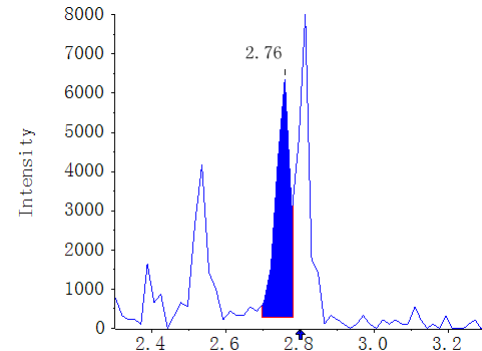

**A21233261b\_b**  
Miquelianin AREA:1.15e4  
S/N:14.3

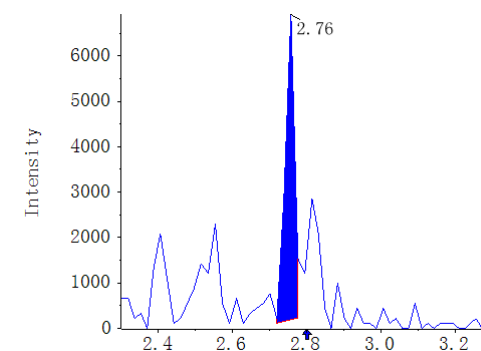

**A21233262b\_b**  
Miquelianin AREA:1.14e4  
S/N:12.0

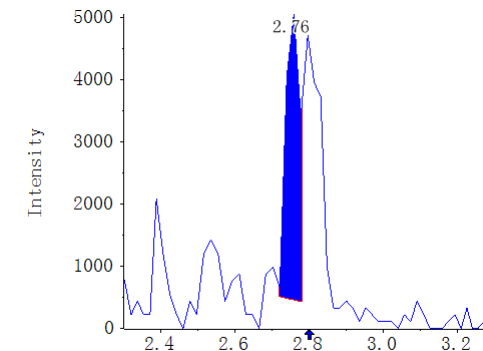

**A21233263b\_b**  
Miquelianin AREA:1.31e4  
S/N:13.8

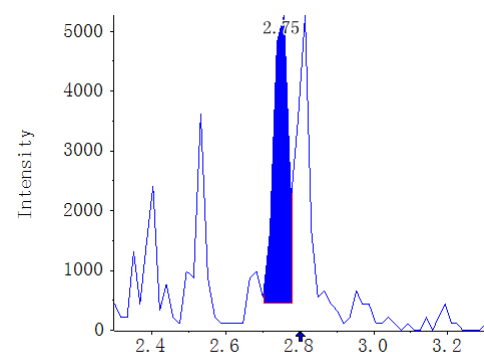

**A21233264b\_b**  
Miquelianin AREA:1.37e4  
S/N:15.4

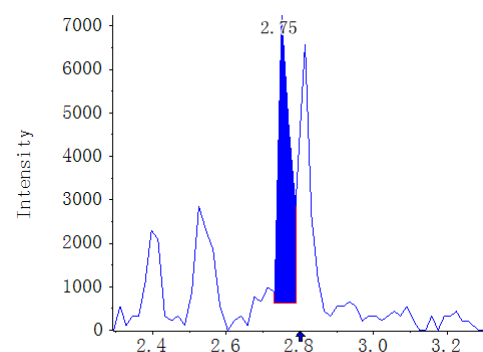

**A21233265b\_b**  
Miquelianin AREA:7.78e3  
S/N:14.5

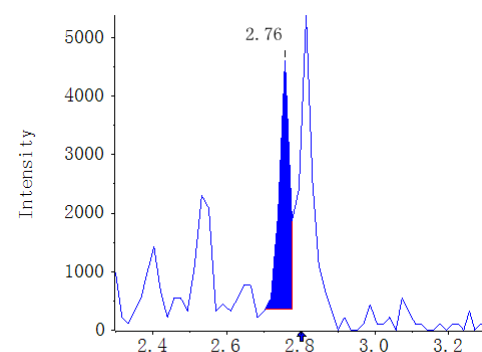

**A21233266b\_b**  
Miquelianin AREA:1.33e5  
S/N:81.3

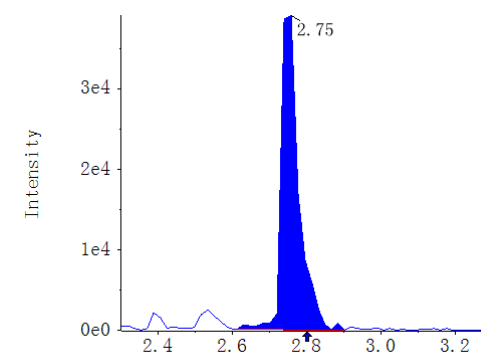

**A21233267b\_b**  
Miquelianin AREA:8.58e3  
S/N:12.3

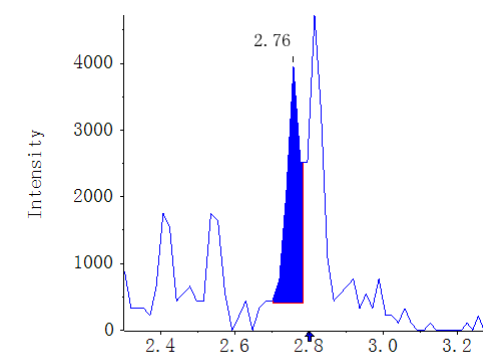

|                    |                                                    |                 |                      |
|--------------------|----------------------------------------------------|-----------------|----------------------|
| Result Table       | MWXS-21-2101D-3_18_WH6500-5_A20-3_V1.0_TY_20211028 | Algorithm Used  | MQ4                  |
| Acquisition Method | Flavonoids_V1.0_WH6500-5_LT_20211025.dam           | Instrument Name | QTRAP 6500+ Low Mass |
| Project            | N/A                                                | Analytes QTY    | 204:46               |

**Compound name: Isorhamnetin (315.1 / 300.0)**

| Sample Name           | Sample Type     | Area (cps) | Is Area (cps) | RT (min) | S/N   | Target Conc | Calculated Conc.() |
|-----------------------|-----------------|------------|---------------|----------|-------|-------------|--------------------|
| STD_0.5nM             | Standard        | 5.25e3     | N/A           | 5.18     | 25.4  | 0.5000      | 4.166319e-1        |
| STD_1nM               | Standard        | 1.04e4     | N/A           | 5.17     | 47.1  | 1.0000      | 8.931799e-1        |
| STD_5nM               | Standard        | 7.49e4     | N/A           | 5.18     | 122.5 | 5.0000      | 6.866663e0         |
| STD_10nM              | Standard        | 1.07e5     | N/A           | 5.18     | 159.4 | 10.0000     | 9.892007e0         |
| STD_20nM              | Standard        | 1.97e5     | N/A           | 5.17     | 160.5 | 20.0000     | 1.820341e1         |
| STD_50nM              | Standard        | 5.43e5     | N/A           | 5.18     | 210.0 | 50.0000     | 5.023156e1         |
| STD_100nM             | Standard        | 1.07e6     | N/A           | 5.18     | 180.8 | 100.0000    | 9.924769e1         |
| STD_200nM             | Standard        | 2.17e6     | N/A           | 5.17     | 199.8 | 200.0000    | 2.007489e2         |
| STD_500nM             | Standard        | N/A        | N/A           | N/A      | N/A   | 500.0000    | N/A                |
| STD_1000nM            | Standard        | N/A        | N/A           | N/A      | N/A   | 1000.0000   | N/A                |
| STD_2000nM            | Standard        | N/A        | N/A           | N/A      | N/A   | 2000.0000   | N/A                |
| V1.0_MW_RQC1_20211018 | Quality Control | N/A        | N/A           | N/A      | N/A   | 0.0000      | N/A                |
| Blank                 | Unknown         | N/A        | N/A           | N/A      | N/A   | N/A         | N/A                |
| V1.0_MWMS_20211021_1  | Unknown         | 1.85e6     | N/A           | 5.19     | 207.0 | N/A         | 1.713893e2         |
| MWXS212101D3_R1       | Quality Control | 1.84e6     | N/A           | 5.19     | 227.8 | 0.0000      | 1.700508e2         |
| MWXS212101D3_R2       | Quality Control | 1.85e6     | N/A           | 5.19     | 199.9 | 0.0000      | 1.713553e2         |
| MWXS212101D3_R3       | Quality Control | 1.85e6     | N/A           | 5.19     | 224.7 | 0.0000      | 1.713858e2         |
| A21233250b_b          | Unknown         | N/A        | N/A           | N/A      | N/A   | N/A         | N/A                |
| A21233251b_b          | Unknown         | N/A        | N/A           | N/A      | N/A   | N/A         | N/A                |
| A21233252b_b          | Unknown         | N/A        | N/A           | N/A      | N/A   | N/A         | N/A                |
| A21233253b_b          | Unknown         | 1.62e4     | N/A           | 5.19     | 53.5  | N/A         | 1.432749e0         |
| A21233254b_b          | Unknown         | N/A        | N/A           | N/A      | N/A   | N/A         | N/A                |
| A21233255b_b          | Unknown         | N/A        | N/A           | N/A      | N/A   | N/A         | N/A                |
| A21233256b_b          | Unknown         | N/A        | N/A           | N/A      | N/A   | N/A         | N/A                |
| A21233257b_b          | Unknown         | N/A        | N/A           | N/A      | N/A   | N/A         | N/A                |
| A21233258b_b          | Unknown         | N/A        | N/A           | N/A      | N/A   | N/A         | N/A                |
| A21233259b_b          | Unknown         | N/A        | N/A           | N/A      | N/A   | N/A         | N/A                |
| A21233260b_b          | Unknown         | N/A        | N/A           | N/A      | N/A   | N/A         | N/A                |
| A21233261b_b          | Unknown         | N/A        | N/A           | N/A      | N/A   | N/A         | N/A                |
| A21233262b_b          | Unknown         | N/A        | N/A           | N/A      | N/A   | N/A         | N/A                |
| A21233263b_b          | Unknown         | N/A        | N/A           | N/A      | N/A   | N/A         | N/A                |
| A21233264b_b          | Unknown         | N/A        | N/A           | N/A      | N/A   | N/A         | N/A                |
| A21233265b_b          | Unknown         | N/A        | N/A           | N/A      | N/A   | N/A         | N/A                |
| A21233266b_b          | Unknown         | N/A        | N/A           | N/A      | N/A   | N/A         | N/A                |
| A21233267b_b          | Unknown         | N/A        | N/A           | N/A      | N/A   | N/A         | N/A                |

Compound name: Isorhamnetin  
Regression Equation:  $y = 10791.05651x + 752.84498$  ( $r = 0.99879$ ) (weighting:  $1/x$ )

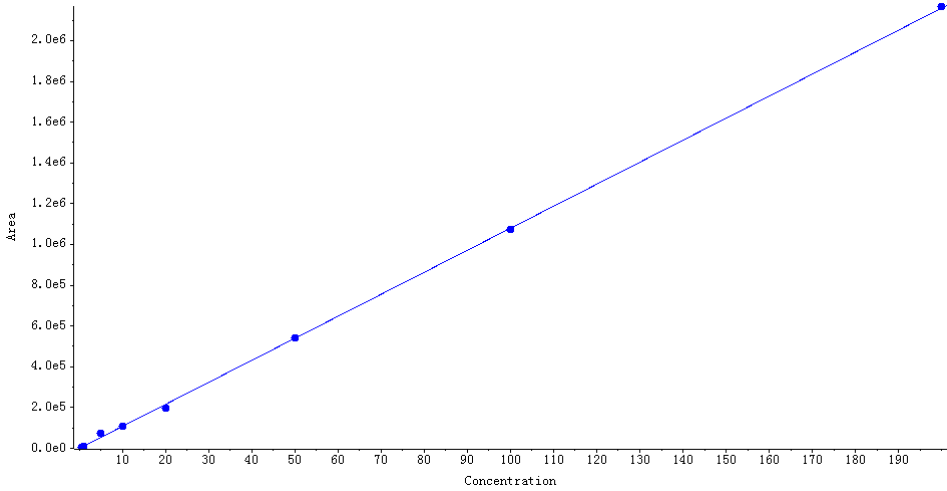

Peak Review

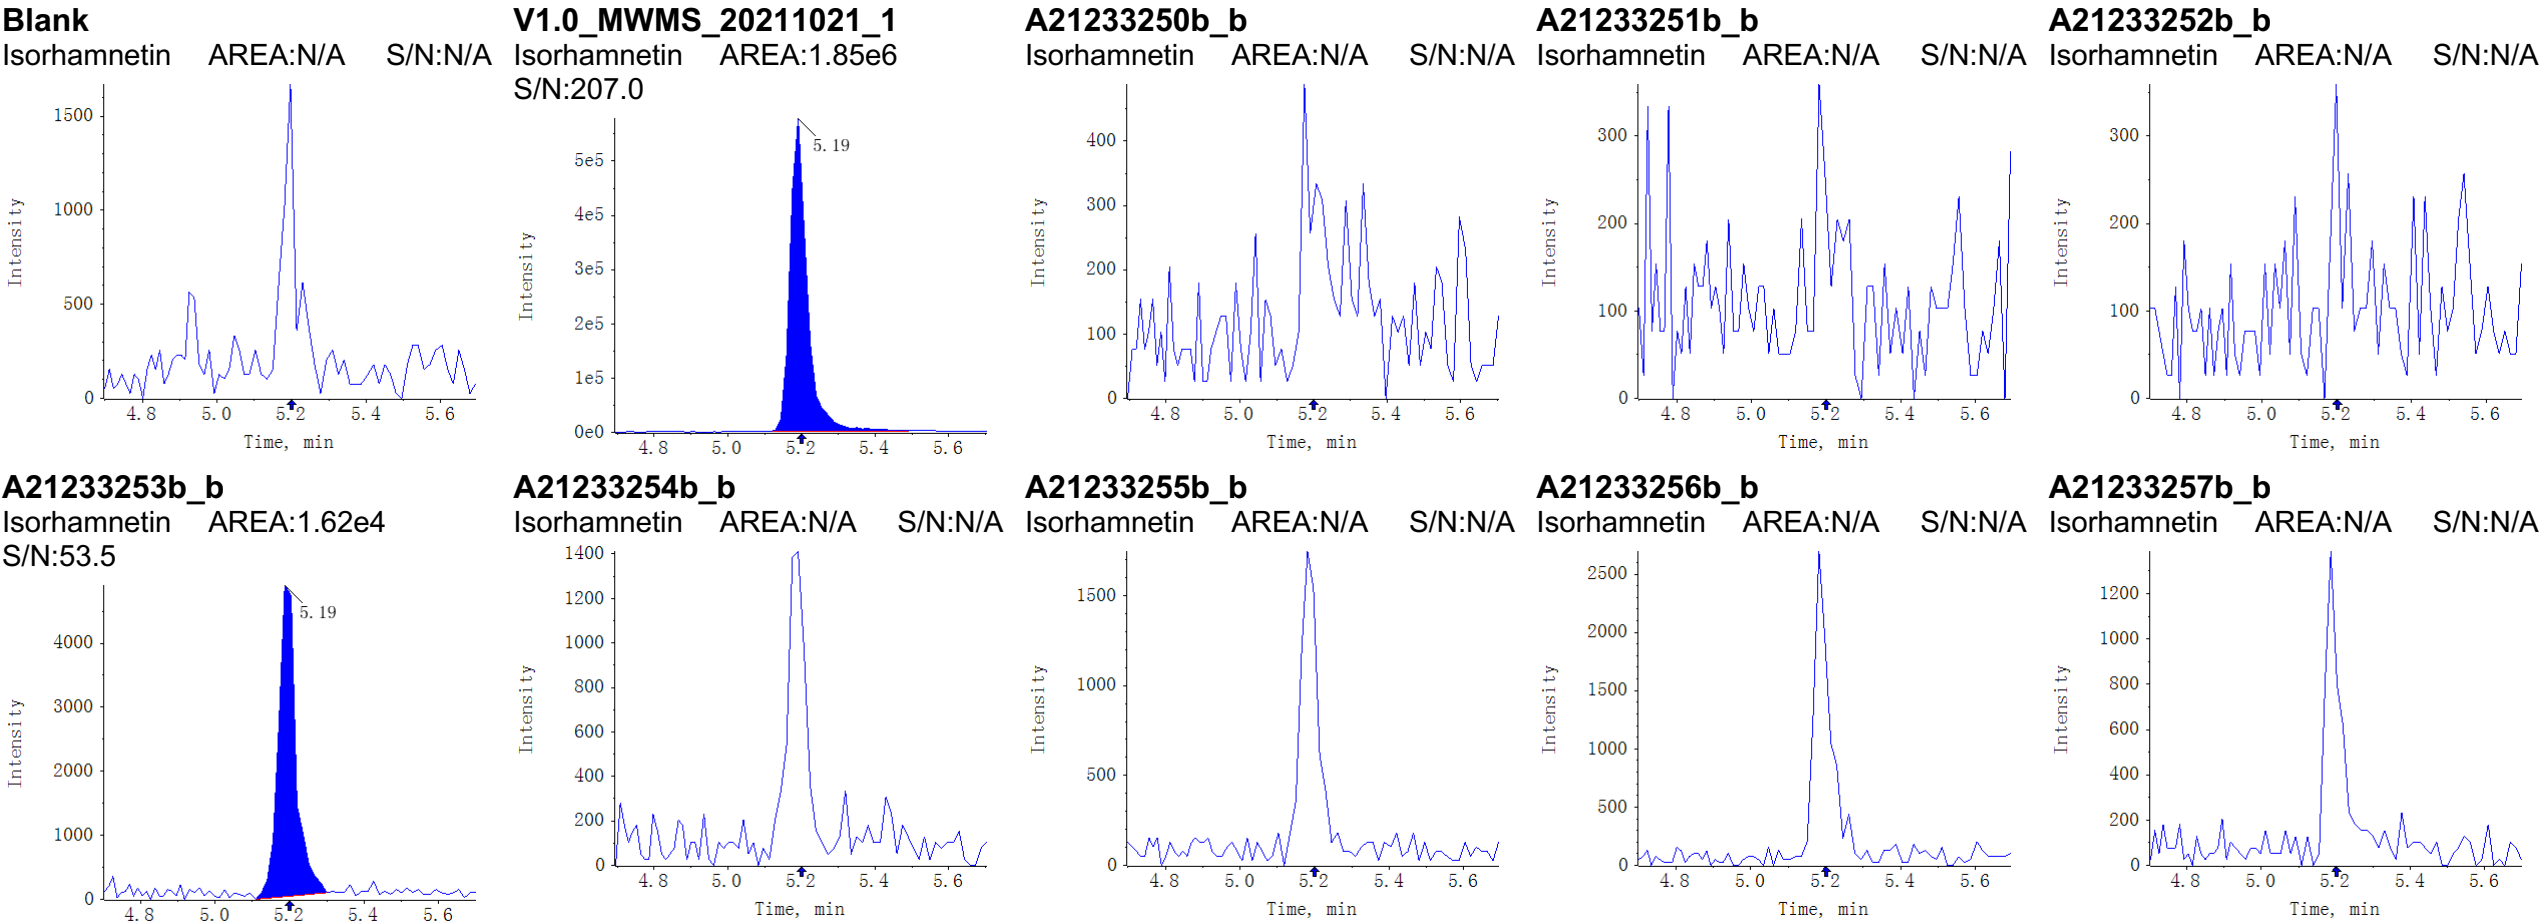

**A21233258b\_b**

Isorhamnetin AREA:N/A S/N:N/A

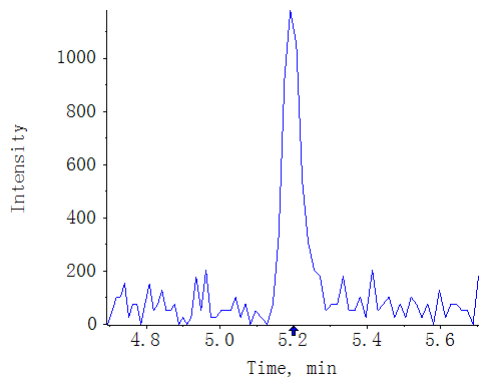

**A21233259b\_b**

Isorhamnetin AREA:N/A S/N:N/A

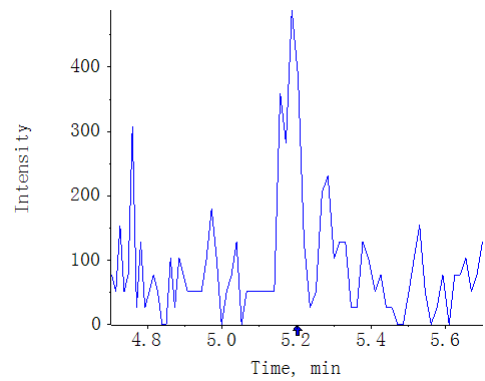

**A21233260b\_b**

Isorhamnetin AREA:N/A S/N:N/A

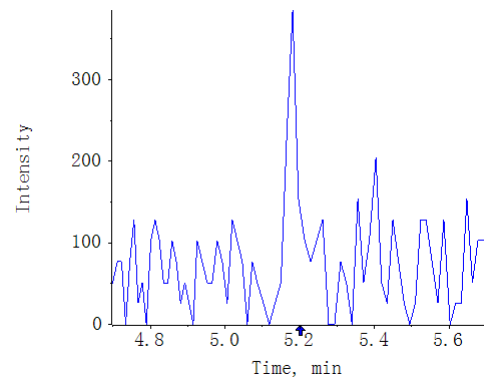

**A21233261b\_b**

Isorhamnetin AREA:N/A S/N:N/A

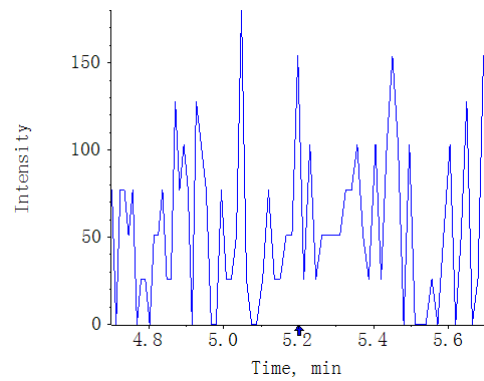

**A21233262b\_b**

Isorhamnetin AREA:N/A S/N:N/A

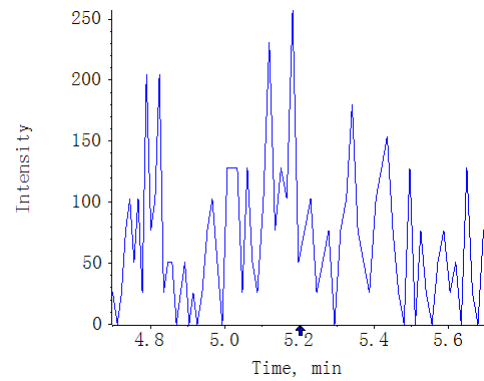

**A21233263b\_b**

Isorhamnetin AREA:N/A S/N:N/A

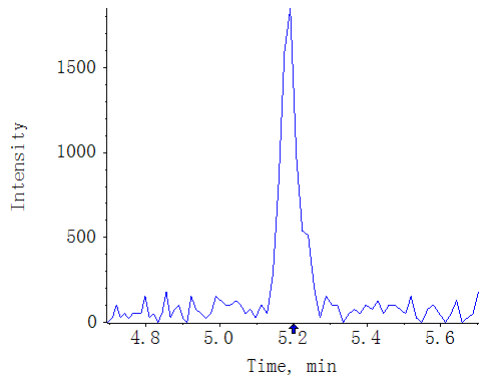

**A21233264b\_b**

Isorhamnetin AREA:N/A S/N:N/A

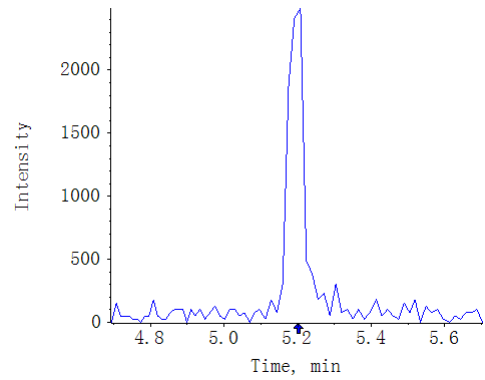

**A21233265b\_b**

Isorhamnetin AREA:N/A S/N:N/A

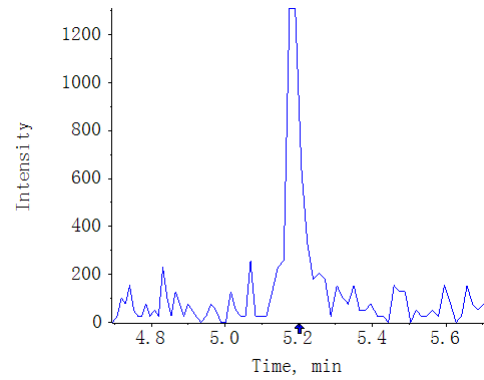

**A21233266b\_b**

Isorhamnetin AREA:N/A S/N:N/A

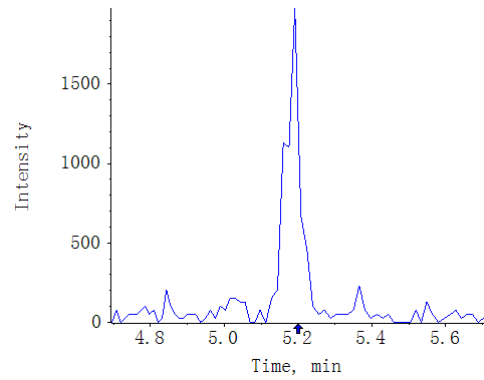

**A21233267b\_b**

Isorhamnetin AREA:N/A S/N:N/A

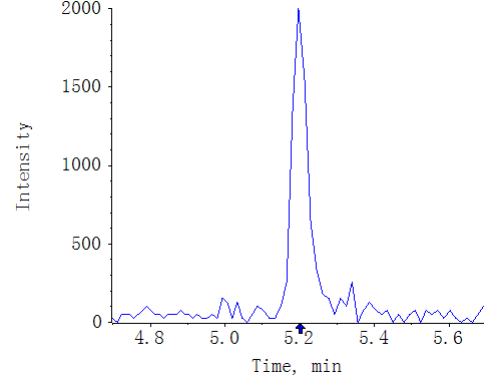

|                    |                                                    |                 |                      |
|--------------------|----------------------------------------------------|-----------------|----------------------|
| Result Table       | MWXS-21-2101D-3_18_WH6500-5_A20-3_V1.0_TY_20211028 | Algorithm Used  | MQ4                  |
| Acquisition Method | Flavonoids_V1.0_WH6500-5_LT_20211025.dam           | Instrument Name | QTRAP 6500+ Low Mass |
| Project            | N/A                                                | Analytes QTY    | 204:4                |

**Compound name: Genistein (269.0 / 133.0)**

| Sample Name           | Sample Type     | Area (cps) | Is Area (cps) | RT (min) | S/N   | Target Conc | Calculated Conc.() |
|-----------------------|-----------------|------------|---------------|----------|-------|-------------|--------------------|
| STD_0.5nM             | Standard        | 2.80e3     | N/A           | 4.89     | 10.4  | 0.5000      | 5.937335e-1        |
| STD_1nM               | Standard        | 4.94e3     | N/A           | 4.89     | 16.0  | 1.0000      | 9.820227e-1        |
| STD_5nM               | Standard        | 3.40e4     | N/A           | 4.89     | 55.1  | 5.0000      | 6.247274e0         |
| STD_10nM              | Standard        | 5.16e4     | N/A           | 4.89     | 63.2  | 10.0000     | 9.451783e0         |
| STD_20nM              | Standard        | 9.99e4     | N/A           | 4.88     | 105.0 | 20.0000     | 1.821503e1         |
| STD_50nM              | Standard        | 2.47e5     | N/A           | 4.89     | 122.6 | 50.0000     | 4.488963e1         |
| STD_100nM             | Standard        | 4.97e5     | N/A           | 4.90     | 85.3  | 100.0000    | 9.022747e1         |
| STD_200nM             | Standard        | 9.06e5     | N/A           | 4.89     | 100.5 | 200.0000    | 1.644241e2         |
| STD_500nM             | Standard        | 3.04e6     | N/A           | 4.89     | 105.3 | 500.0000    | 5.514690e2         |
| STD_1000nM            | Standard        | N/A        | N/A           | N/A      | N/A   | 1000.0000   | N/A                |
| STD_2000nM            | Standard        | N/A        | N/A           | N/A      | N/A   | 2000.0000   | N/A                |
| V1.0_MW_RQC1_20211018 | Quality Control | N/A        | N/A           | N/A      | N/A   | 0.0000      | N/A                |
| Blank                 | Unknown         | N/A        | N/A           | N/A      | N/A   | N/A         | N/A                |
| V1.0_MWMS_20211021_1  | Unknown         | 7.34e5     | N/A           | 4.90     | 105.3 | N/A         | 1.331472e2         |
| MWXS212101D3_R1       | Quality Control | 7.34e5     | N/A           | 4.90     | 111.1 | 0.0000      | 1.331452e2         |
| MWXS212101D3_R2       | Quality Control | 7.23e5     | N/A           | 4.90     | 106.6 | 0.0000      | 1.312784e2         |
| MWXS212101D3_R3       | Quality Control | 7.06e5     | N/A           | 4.90     | 113.2 | 0.0000      | 1.282239e2         |
| A21233250b_b          | Unknown         | N/A        | N/A           | N/A      | N/A   | N/A         | N/A                |
| A21233251b_b          | Unknown         | N/A        | N/A           | N/A      | N/A   | N/A         | N/A                |
| A21233252b_b          | Unknown         | N/A        | N/A           | N/A      | N/A   | N/A         | N/A                |
| A21233253b_b          | Unknown         | 6.94e3     | N/A           | 4.91     | 19.7  | N/A         | 1.344007e0         |
| A21233254b_b          | Unknown         | 1.02e4     | N/A           | 4.90     | 30.4  | N/A         | 1.939017e0         |
| A21233255b_b          | Unknown         | 1.27e4     | N/A           | 4.90     | 38.0  | N/A         | 2.390874e0         |
| A21233256b_b          | Unknown         | 1.42e4     | N/A           | 4.91     | 37.5  | N/A         | 2.664184e0         |
| A21233257b_b          | Unknown         | 1.12e4     | N/A           | 4.91     | 39.1  | N/A         | 2.110189e0         |
| A21233258b_b          | Unknown         | 1.80e4     | N/A           | 4.91     | 64.7  | N/A         | 3.351584e0         |
| A21233259b_b          | Unknown         | N/A        | N/A           | N/A      | N/A   | N/A         | N/A                |
| A21233260b_b          | Unknown         | N/A        | N/A           | N/A      | N/A   | N/A         | N/A                |
| A21233261b_b          | Unknown         | N/A        | N/A           | N/A      | N/A   | N/A         | N/A                |
| A21233262b_b          | Unknown         | 3.01e3     | N/A           | 4.90     | 16.7  | N/A         | 6.314724e-1        |
| A21233263b_b          | Unknown         | 1.33e4     | N/A           | 4.90     | 31.0  | N/A         | 2.498074e0         |
| A21233264b_b          | Unknown         | 1.03e4     | N/A           | 4.91     | 28.5  | N/A         | 1.947256e0         |
| A21233265b_b          | Unknown         | 3.27e4     | N/A           | 4.91     | 63.8  | N/A         | 6.014907e0         |
| A21233266b_b          | Unknown         | 1.58e4     | N/A           | 4.90     | 43.2  | N/A         | 2.948056e0         |
| A21233267b_b          | Unknown         | 2.12e4     | N/A           | 4.91     | 55.5  | N/A         | 3.932252e0         |

Compound name: Genistein  
Regression Equation:  $y = 5513.24728x + -474.44388$  ( $r = 0.99220$ ) (weighting:  $1/x$ )

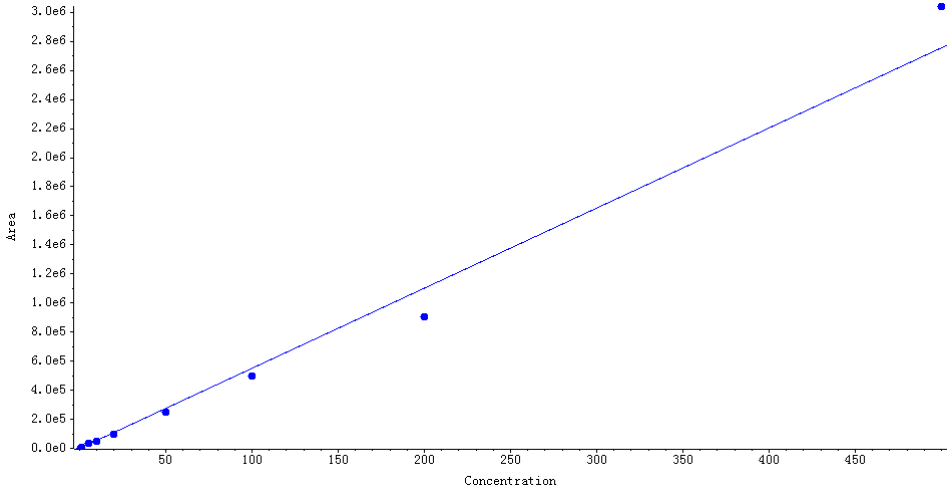

Peak Review

Blank

Genistein AREA:N/A S/N:N/A

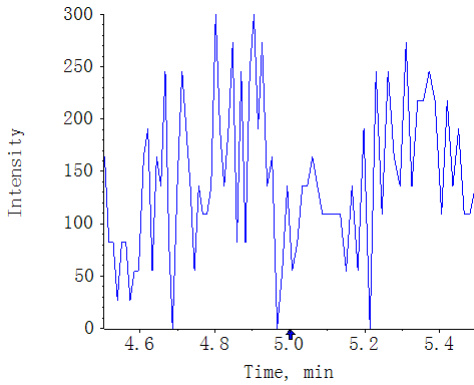

V1.0\_MWMS\_20211021\_1

Genistein AREA:7.34e5 S/N:105.3

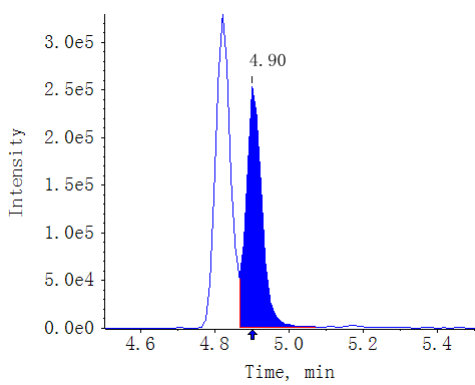

A21233250b\_b

Genistein AREA:N/A S/N:N/A

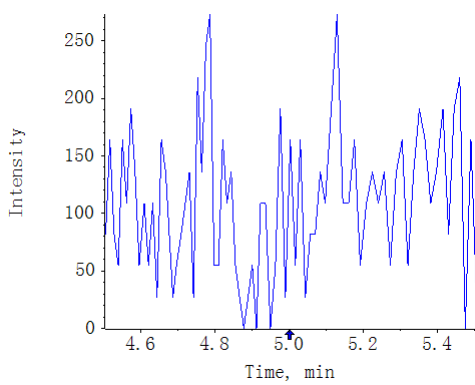

A21233251b\_b

Genistein AREA:N/A S/N:N/A

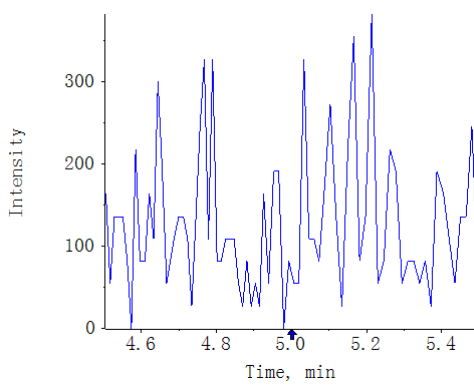

A21233252b\_b

Genistein AREA:N/A S/N:N/A

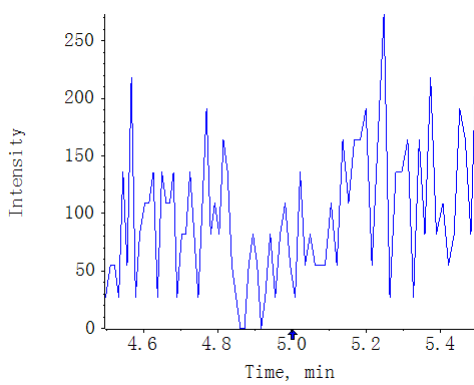

A21233253b\_b

Genistein AREA:6.94e3 S/N:19.7

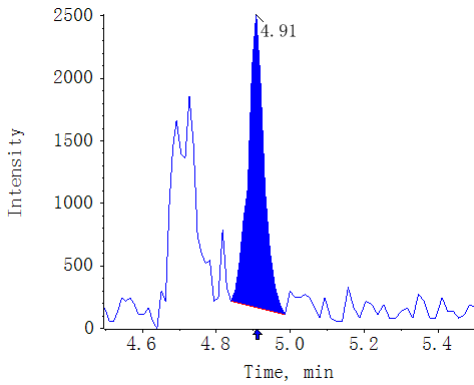

A21233254b\_b

Genistein AREA:1.02e4 S/N:30.4

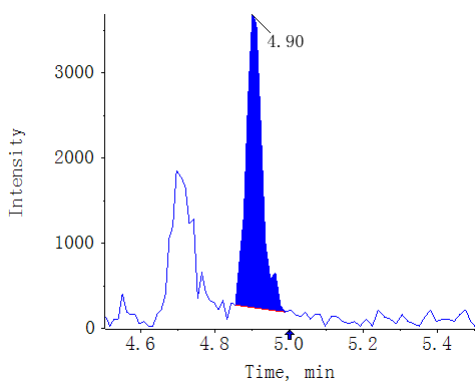

A21233255b\_b

Genistein AREA:1.27e4 S/N:38.0

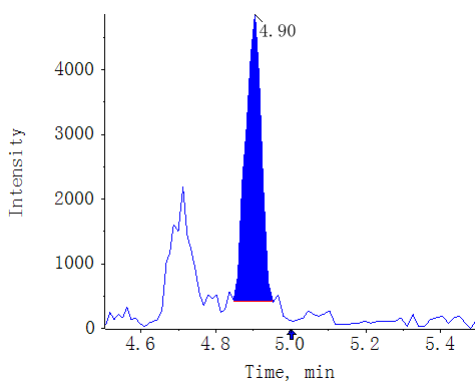

A21233256b\_b

Genistein AREA:1.42e4 S/N:37.5

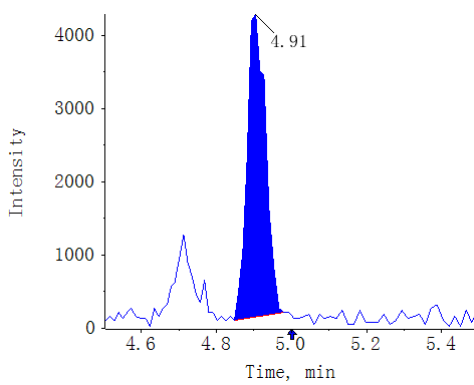

A21233257b\_b

Genistein AREA:1.12e4 S/N:39.1

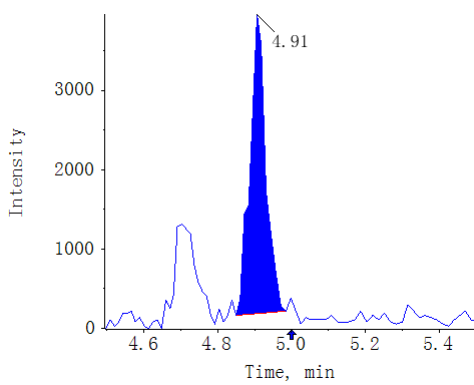

**A21233258b\_b**

Genistein AREA:1.80e4 S/N:64.7

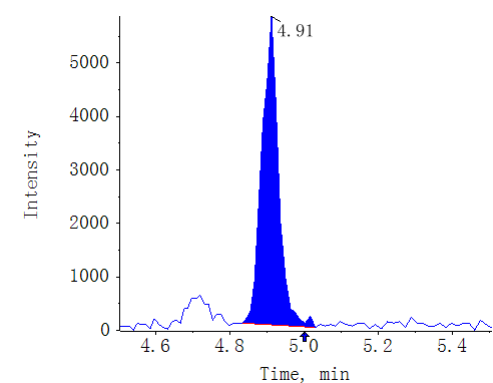

**A21233259b\_b**

Genistein AREA:N/A S/N:N/A

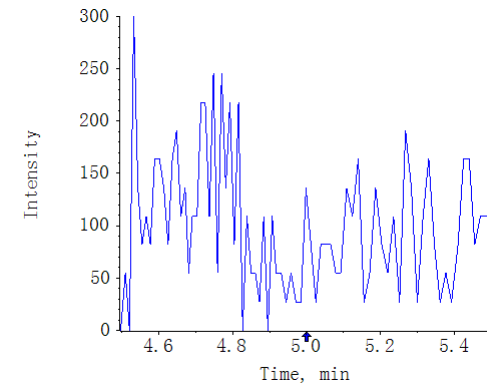

**A21233260b\_b**

Genistein AREA:N/A S/N:N/A

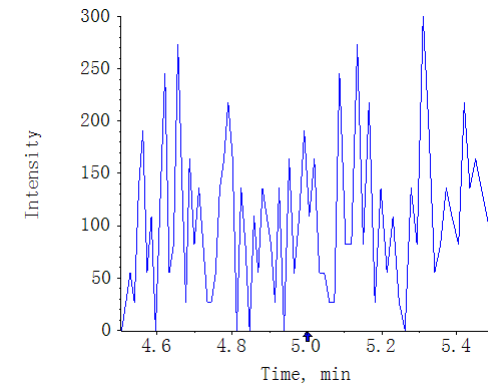

**A21233261b\_b**

Genistein AREA:N/A S/N:N/A

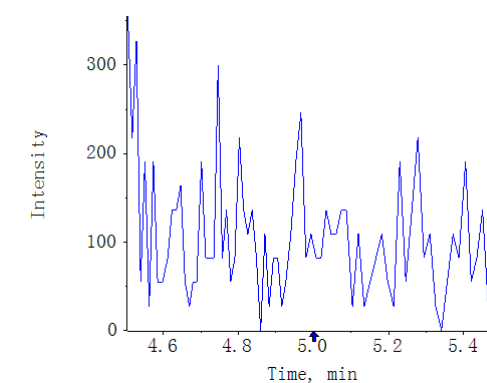

**A21233262b\_b**

Genistein AREA:3.01e3 S/N:16.7

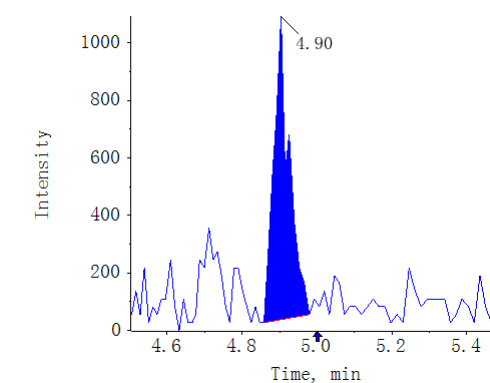

**A21233263b\_b**

Genistein AREA:1.33e4 S/N:31.0

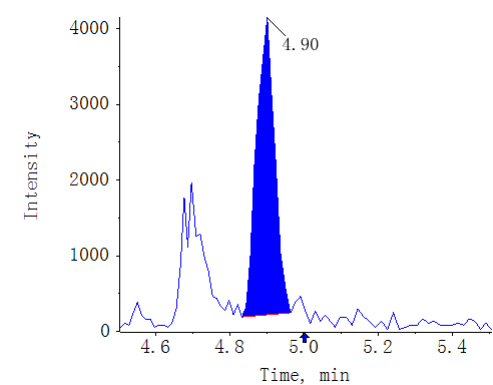

**A21233264b\_b**

Genistein AREA:1.03e4 S/N:28.5

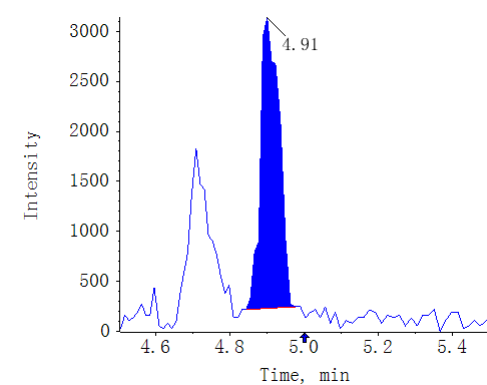

**A21233265b\_b**

Genistein AREA:3.27e4 S/N:63.8

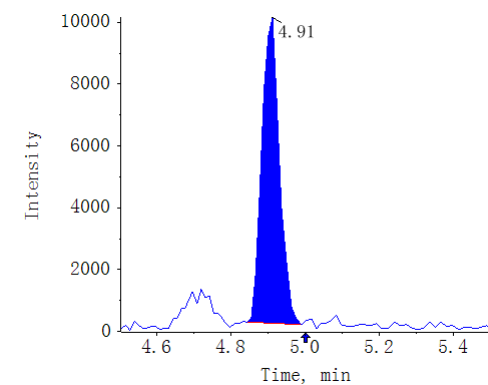

**A21233266b\_b**

Genistein AREA:1.58e4 S/N:43.2

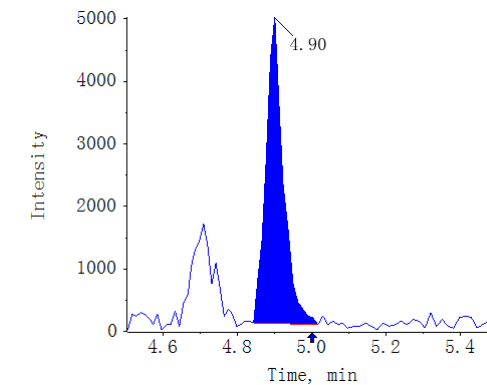

**A21233267b\_b**

Genistein AREA:2.12e4 S/N:55.5

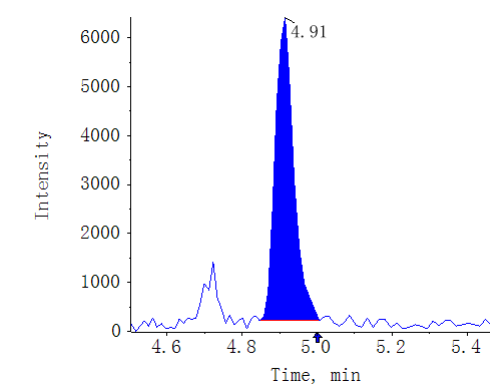

|                    |                                                    |                 |                      |
|--------------------|----------------------------------------------------|-----------------|----------------------|
| Result Table       | MWXS-21-2101D-3_18_WH6500-5_A20-3_V1.0_TY_20211028 | Algorithm Used  | MQ4                  |
| Acquisition Method | Flavonoids_V1.0_WH6500-5_LT_20211025.dam           | Instrument Name | QTRAP 6500+ Low Mass |
| Project            | N/A                                                | Analytes QTY    | 204:123              |

**Compound name: Ononin (475.1 / 267.1)**

| Sample Name           | Sample Type     | Area (cps) | Is Area (cps) | RT (min) | S/N   | Target Conc | Calculated Conc.() |
|-----------------------|-----------------|------------|---------------|----------|-------|-------------|--------------------|
| STD_0.5nM             | Standard        | 2.58e3     | N/A           | 3.57     | 25.8  | 0.5000      | 5.022633e-1        |
| STD_1nM               | Standard        | 4.13e3     | N/A           | 3.55     | 39.1  | 1.0000      | 7.521542e-1        |
| STD_5nM               | Standard        | 4.34e4     | N/A           | 3.56     | 128.9 | 5.0000      | 7.088093e0         |
| STD_10nM              | Standard        | 5.81e4     | N/A           | 3.56     | 205.0 | 10.0000     | 9.450087e0         |
| STD_20nM              | Standard        | 1.16e5     | N/A           | 3.55     | 298.1 | 20.0000     | 1.882459e1         |
| STD_50nM              | Standard        | 2.93e5     | N/A           | 3.56     | 440.3 | 50.0000     | 4.731097e1         |
| STD_100nM             | Standard        | 5.95e5     | N/A           | 3.56     | 467.1 | 100.0000    | 9.607673e1         |
| STD_200nM             | Standard        | 1.28e6     | N/A           | 3.55     | 630.4 | 200.0000    | 2.064951e2         |
| STD_500nM             | Standard        | N/A        | N/A           | N/A      | N/A   | 500.0000    | N/A                |
| STD_1000nM            | Standard        | N/A        | N/A           | N/A      | N/A   | 1000.0000   | N/A                |
| STD_2000nM            | Standard        | N/A        | N/A           | N/A      | N/A   | 2000.0000   | N/A                |
| V1.0_MW_RQC1_20211018 | Quality Control | N/A        | N/A           | N/A      | N/A   | 0.0000      | N/A                |
| Blank                 | Unknown         | N/A        | N/A           | N/A      | N/A   | N/A         | N/A                |
| V1.0_MWMS_20211021_1  | Unknown         | 9.31e5     | N/A           | 3.57     | 544.6 | N/A         | 1.503145e2         |
| MWXS212101D3_R1       | Quality Control | 9.78e5     | N/A           | 3.56     | 608.3 | 0.0000      | 1.578493e2         |
| MWXS212101D3_R2       | Quality Control | 9.96e5     | N/A           | 3.57     | 750.5 | 0.0000      | 1.607358e2         |
| MWXS212101D3_R3       | Quality Control | 9.33e5     | N/A           | 3.57     | 703.6 | 0.0000      | 1.505144e2         |
| A21233250b_b          | Unknown         | 5.29e4     | N/A           | 3.51     | 16.1  | N/A         | 8.613193e0         |
| A21233251b_b          | Unknown         | 1.12e4     | N/A           | 3.51     | 8.6   | N/A         | 1.900289e0         |
| A21233252b_b          | Unknown         | N/A        | N/A           | N/A      | N/A   | N/A         | N/A                |
| A21233253b_b          | Unknown         | N/A        | N/A           | N/A      | N/A   | N/A         | N/A                |
| A21233254b_b          | Unknown         | N/A        | N/A           | N/A      | N/A   | N/A         | N/A                |
| A21233255b_b          | Unknown         | N/A        | N/A           | N/A      | N/A   | N/A         | N/A                |
| A21233256b_b          | Unknown         | N/A        | N/A           | N/A      | N/A   | N/A         | N/A                |
| A21233257b_b          | Unknown         | N/A        | N/A           | N/A      | N/A   | N/A         | N/A                |
| A21233258b_b          | Unknown         | N/A        | N/A           | N/A      | N/A   | N/A         | N/A                |
| A21233259b_b          | Unknown         | N/A        | N/A           | N/A      | N/A   | N/A         | N/A                |
| A21233260b_b          | Unknown         | N/A        | N/A           | N/A      | N/A   | N/A         | N/A                |
| A21233261b_b          | Unknown         | N/A        | N/A           | N/A      | N/A   | N/A         | N/A                |
| A21233262b_b          | Unknown         | N/A        | N/A           | N/A      | N/A   | N/A         | N/A                |
| A21233263b_b          | Unknown         | N/A        | N/A           | N/A      | N/A   | N/A         | N/A                |
| A21233264b_b          | Unknown         | N/A        | N/A           | N/A      | N/A   | N/A         | N/A                |
| A21233265b_b          | Unknown         | N/A        | N/A           | N/A      | N/A   | N/A         | N/A                |
| A21233266b_b          | Unknown         | N/A        | N/A           | N/A      | N/A   | N/A         | N/A                |
| A21233267b_b          | Unknown         | N/A        | N/A           | N/A      | N/A   | N/A         | N/A                |

Compound name: Ononin  
Regression Equation:  $y = 6199.63508x - 533.36248$  ( $r = 0.99791$ ) (weighting:  $1/x$ )

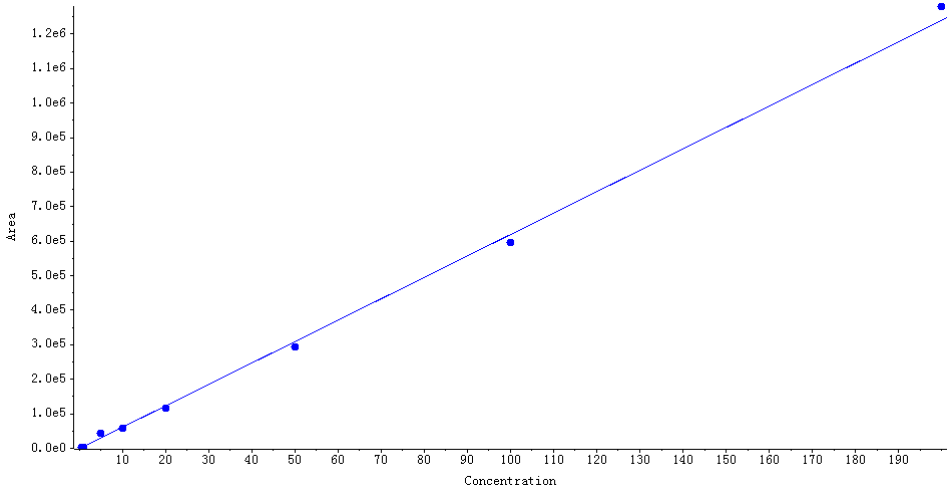

Peak Review

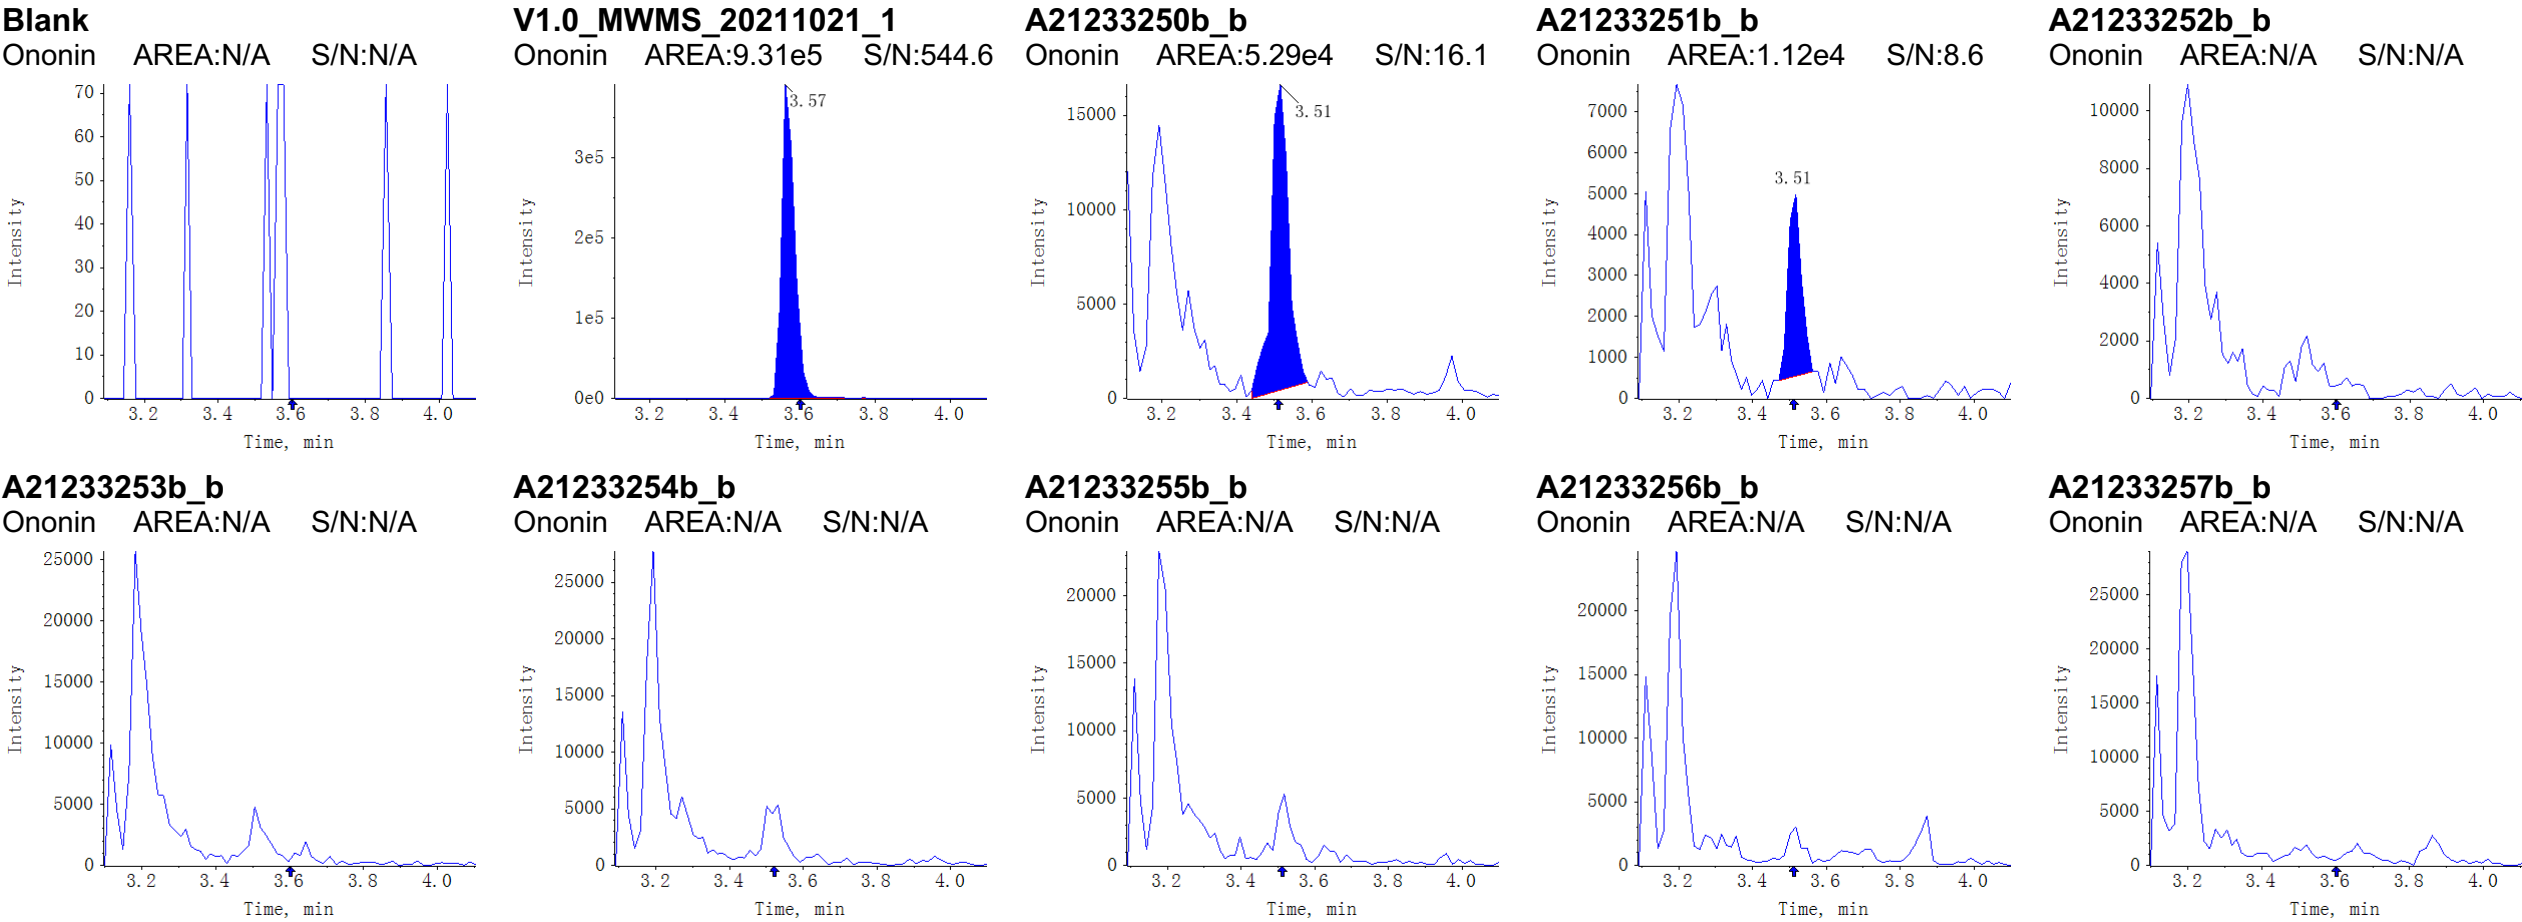

**A21233258b\_b**

Ononin AREA:N/A S/N:N/A

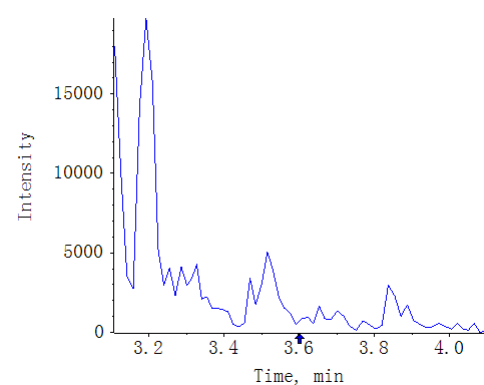

**A21233259b\_b**

Ononin AREA:N/A S/N:N/A

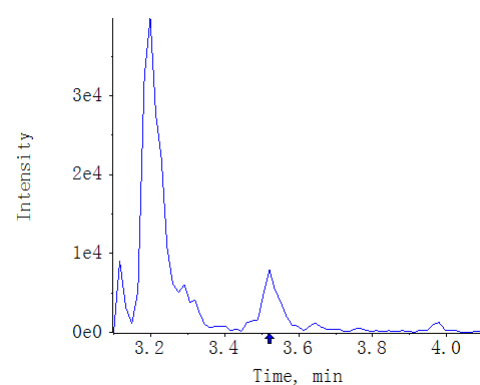

**A21233260b\_b**

Ononin AREA:N/A S/N:N/A

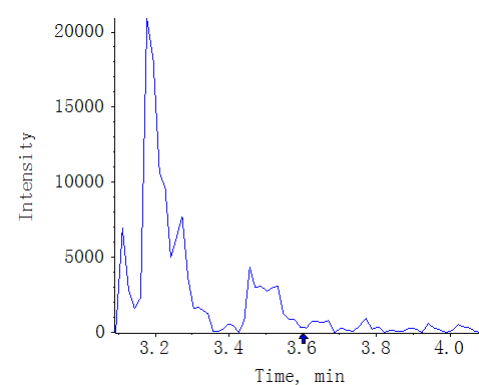

**A21233261b\_b**

Ononin AREA:N/A S/N:N/A

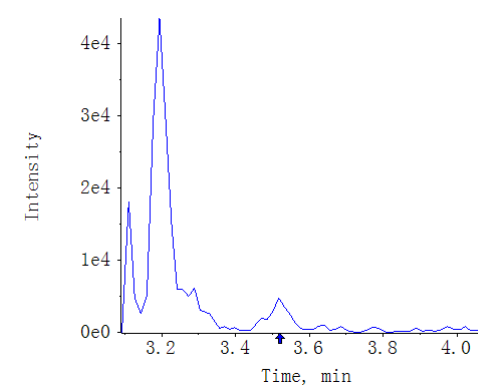

**A21233262b\_b**

Ononin AREA:N/A S/N:N/A

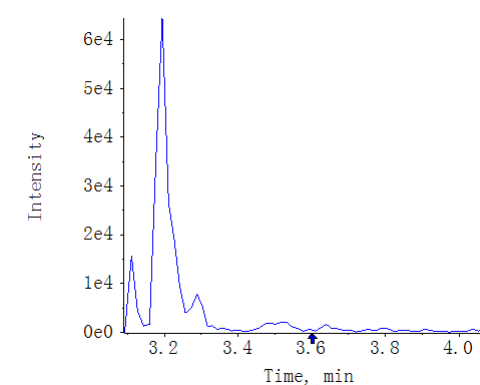

**A21233263b\_b**

Ononin AREA:N/A S/N:N/A

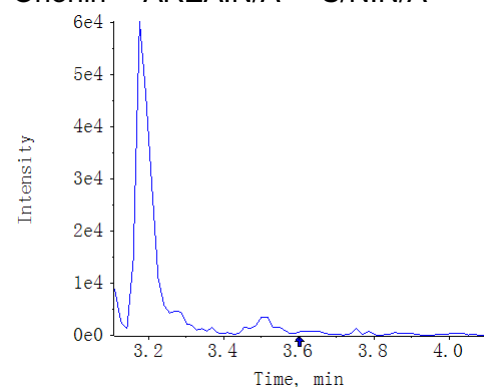

**A21233264b\_b**

Ononin AREA:N/A S/N:N/A

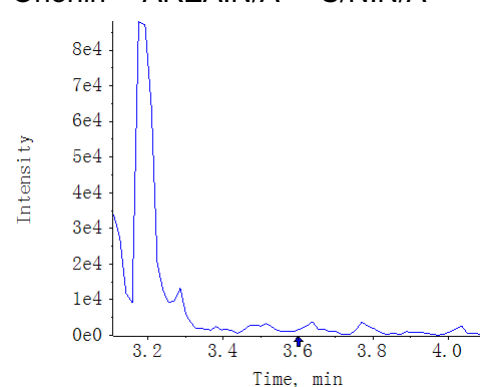

**A21233265b\_b**

Ononin AREA:N/A S/N:N/A

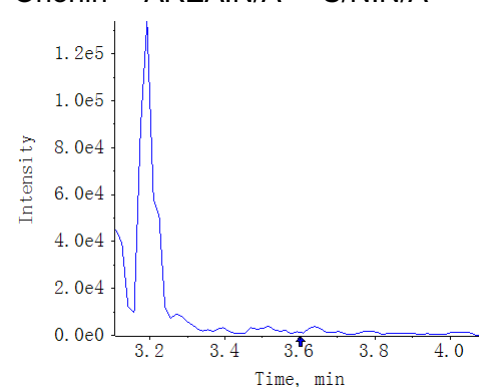

**A21233266b\_b**

Ononin AREA:N/A S/N:N/A

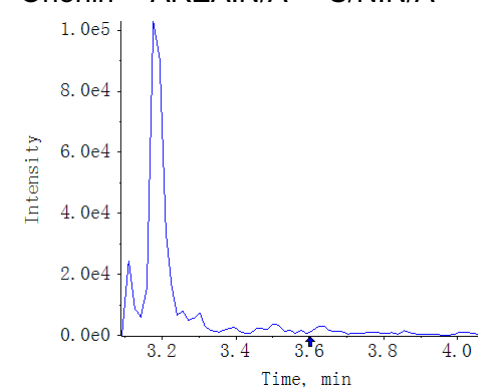

**A21233267b\_b**

Ononin AREA:N/A S/N:N/A

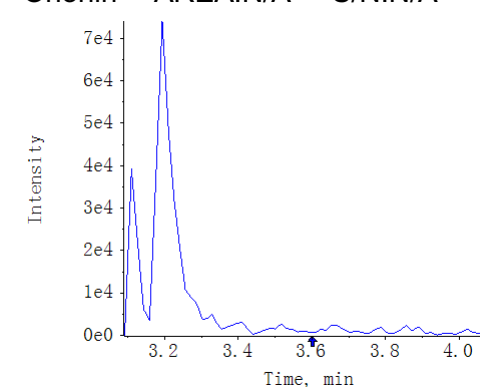

Supplement: s1 [file s1]
